# Supplementary material
Source: publisher figshare collection journal article supplement (https://karger.figshare.com/ndownloader/files/30750346)
Supplement: Supplementary file 1 [file 30750346]

**Table S4. Number of OUTs identified in this study.**

| OTU_325 | k__Bacteria;p__Proteobacteria;c__Gammaproteobacteria;o__Xanthomonadales;f__Xanthomonadaceae;g__Luteimonas | 1 |
| --- | --- | --- |
| OTU_324 | k__Bacteria;p__Acidobacteria;c__Acidobacteriia | 1 |
| OTU_327 | k__Bacteria;p__Firmicutes;c__Clostridia;o__Clostridiales;f__Ruminococcaceae;g__unidentified_Ruminococcaceae;s__Oscillibacter_sp_ER4 | 1 |
| OTU_326 | k__Bacteria;p__Proteobacteria;c__Gammaproteobacteria;o__unidentified_Gammaproteobacteria;f__unidentified_Gammaproteobacteria;g__SUP05_cluster;s__ | 0.99 |
| OTU_321 | k__Bacteria | 0.95 |
| OTU_320 | k__Bacteria;p__Actinobacteria;c__Acidimicrobiia | 1 |
| OTU_323 | k__Bacteria;p__Firmicutes;c__Clostridia;o__Clostridiales;f__Lachnospiraceae;g__Blautia | 0.97 |
| OTU_322 | k__Bacteria;p__Bacteroidetes;c__Bacteroidia;o__Flavobacteriales;f__Crocinitomicaceae | 1 |
| OTU_899 | k__Bacteria;p__Chloroflexi;c__Ktedonobacteria;o__Ktedonobacterales;f__;g__;s__ | 1 |
| OTU_898 | k__Bacteria;p__Proteobacteria;c__Deltaproteobacteria;o__Myxococcales;f__Haliangiaceae;g__Haliangium;s__ | 0.99 |
| OTU_2829 | k__Bacteria;p__Actinobacteria;c__Acidimicrobiia;o__;f__;g__;s__ | 0.83 |
| OTU_328 | k__Bacteria;p__Acidobacteria;c__unidentified_Acidobacteria;o__unidentified_Acidobacteria;f__unidentified_Acidobacteria;g__unidentified_Acidobacteria;s__Acidobacteria_bacterium_CB_286306 | 1 |
| OTU_890 | k__Bacteria;p__Proteobacteria;c__Gammaproteobacteria;o__Legionellales;f__Legionellaceae;g__Legionella | 1 |
| OTU_897 | k__Bacteria;p__Bacteroidetes;c__Bacteroidia;o__Bacteroidales;f__Rikenellaceae;g__;s__ | 1 |
| OTU_896 | k__Bacteria;p__Proteobacteria;c__Alphaproteobacteria;o__unidentified_Alphaproteobacteria;f__unidentified_Alphaproteobacteria;g__Acuticoccus;s__ | 0.95 |
| OTU_895 | k__Bacteria;p__Bacteroidetes;c__Bacteroidia;o__Bacteroidales;f__Muribaculaceae;g__;s__ | 1 |
| OTU_894 | k__Bacteria;p__Proteobacteria;c__Gammaproteobacteria;o__unidentified_Gammaproteobacteria;f__Woeseiaceae;g__Woeseia;s__ | 1 |
| OTU_1680 | k__Bacteria;p__Firmicutes;c__Clostridia;o__Clostridiales;f__Lachnospiraceae | 1 |
| OTU_2919 | k__Bacteria;p__Chloroflexi;c__Ktedonobacteria;o__Ktedonobacterales;f__Ktedonobacteraceae;g__;s__ | 0.94 |
| OTU_2918 | k__Bacteria;p__unidentified_Bacteria;c__unidentified_Bacteria;o__unidentified_Bacteria;f__unidentified_Bacteria;g__unidentified_Bacteria | 1 |
| OTU_2911 | k__Bacteria;p__Verrucomicrobia;c__Verrucomicrobiae;o__Chthoniobacterales;f__Chthoniobacteraceae;g__;s__ | 1 |
| OTU_329 | k__Bacteria;p__Proteobacteria;c__Gammaproteobacteria;o__Pasteurellales;f__Pasteurellaceae;g__Muribacter;s__Muribacter_muris | 0.84 |
| OTU_2913 | k__Bacteria;p__Armatimonadetes;c__;o__;f__;g__;s__ | 0.98 |
| OTU_2912 | k__Bacteria | 1 |
| OTU_2915 | k__Bacteria;p__Proteobacteria;c__Gammaproteobacteria;o__unidentified_Gammaproteobacteria;f__unidentified_Gammaproteobacteria;g__unidentified_Gammaproteobacteria;s__beta_proteobacterium_WF17 | 0.9 |
| OTU_2914 | k__Bacteria;p__Firmicutes;c__Clostridia;o__Clostridiales;f__Ruminococcaceae | 0.87 |
| OTU_2917 | k__Bacteria;p__Proteobacteria;c__Alphaproteobacteria;o__Rhodobacterales;f__Rhodobacteraceae | 0.97 |
| OTU_2828 | k__Bacteria;p__Acidobacteria;c__Acidobacteriia;o__Acidobacteriales;f__unidentified_Acidobacteriales | 1 |
| OTU_431 | k__Bacteria;p__Bacteroidetes;c__Bacteroidia;o__Cytophagales;f__Microscillaceae;g__Chryseolinea;s__ | 0.99 |
| OTU_430 | k__Bacteria;p__Chloroflexi;c__Ktedonobacteria;o__Ktedonobacterales;f__;g__;s__ | 0.88 |
| OTU_433 | k__Bacteria;p__Chloroflexi;c__Ktedonobacteria;o__Ktedonobacterales;f__Ktedonobacteraceae;g__;s__ | 0.96 |
| OTU_432 | k__Bacteria;p__Actinobacteria;c__unidentified_Actinobacteria;o__Micrococcales;f__Bogoriellaceae;g__Georgenia;s__ | 0.87 |
| OTU_435 | k__Bacteria;p__Proteobacteria;c__Gammaproteobacteria;o__Xanthomonadales;f__Xanthomonadaceae | 1 |
| OTU_434 | k__Bacteria;p__Firmicutes;c__Clostridia;o__Clostridiales;f__Ruminococcaceae;g__;s__ | 1 |
| OTU_437 | k__Bacteria;p__Bacteroidetes;c__Bacteroidia;o__Chitinophagales;f__Chitinophagaceae;g__Niastella;s__ | 1 |
| OTU_436 | k__Bacteria;p__Actinobacteria;c__unidentified_Actinobacteria;o__Frankiales;f__Cryptosporangiaceae;g__Cryptosporangium;s__Cryptosporangium_japonicum | 1 |
| OTU_439 | k__Bacteria;p__Proteobacteria;c__Gammaproteobacteria;o__unidentified_Gammaproteobacteria;f__Burkholderiaceae;g__Sutterella | 1 |
| OTU_438 | k__Bacteria;p__Proteobacteria;c__Gammaproteobacteria;o__unidentified_Gammaproteobacteria;f__Burkholderiaceae;g__unidentified_Burkholderiaceae | 1 |
| OTU_237 | k__Bacteria;p__Proteobacteria;c__Alphaproteobacteria;o__Rhodobacterales;f__Rhodobacteraceae;g__Marivita;s__ | 0.95 |
| OTU_1488 | k__Bacteria;p__unidentified_Bacteria;c__unidentified_Bacteria;o__unidentified_Bacteria;f__unidentified_Bacteria;g__unidentified_Bacteria;s__soil_bacterium_WWH121 | 0.89 |
| OTU_1489 | k__Bacteria;p__Bacteroidetes;c__Bacteroidia;o__Bacteroidales;f__Muribaculaceae;g__;s__ | 0.98 |
| OTU_1486 | k__Bacteria;p__Proteobacteria;c__Gammaproteobacteria | 0.94 |
| OTU_1487 | k__Bacteria;p__Actinobacteria;c__unidentified_Actinobacteria;o__Frankiales;f__Geodermatophilaceae;g__Geodermatophilus | 1 |
| OTU_1484 | k__Bacteria;p__unidentified_Bacteria;c__unidentified_Bacteria;o__Campylobacterales;f__Campylobacteraceae;g__Campylobacter | 1 |
| OTU_1485 | k__Bacteria;p__Chloroflexi;c__;o__;f__;g__;s__ | 0.9 |
| OTU_1482 | k__Bacteria;p__Bacteroidetes;c__Bacteroidia;o__Cytophagales;f__Spirosomaceae;g__Spirosoma;s__ | 0.92 |
| OTU_1483 | k__Bacteria;p__Gemmatimonadetes;c__unidentified_Gemmatimonadetes;o__Gemmatimonadales;f__Gemmatimonadaceae;g__;s__ | 0.99 |
| OTU_1480 | k__Bacteria;p__Spirochaetes;c__Spirochaetia;o__Spirochaetales;f__Spirochaetaceae;g__unidentified_Spirochaetaceae;s__Spirochaetaceae_bacterium_SURF-1 | 1 |
| OTU_1481 | k__Bacteria;p__Proteobacteria;c__Deltaproteobacteria;o__Desulfovibrionales | 0.88 |
| OTU_718 | k__Bacteria;p__Verrucomicrobia;c__Verrucomicrobiae;o__Chthoniobacterales;f__Chthoniobacteraceae;g__Candidatus_Udaeobacter;s__ | 1 |
| OTU_236 | k__Bacteria;p__Firmicutes;c__Bacilli;o__Bacillales;f__Bacillaceae;g__Virgibacillus;s__ | 0.96 |
| OTU_719 | k__Bacteria;p__Armatimonadetes;c__;o__;f__;g__;s__ | 0.91 |
| OTU_248 | k__Bacteria;p__Acidobacteria;c__Acidobacteriia;o__Acidobacteriales | 1 |
| OTU_249 | k__Bacteria;p__Actinobacteria;c__unidentified_Actinobacteria;o__Pseudonocardiales;f__Pseudonocardiaceae;g__Amycolatopsis | 0.98 |
| OTU_246 | k__Bacteria;p__Proteobacteria;c__Gammaproteobacteria;o__Pseudomonadales;f__Pseudomonadaceae;g__Pseudomonas;s__Pseudomonas_aeruginosa | 0.85 |
| OTU_247 | k__Bacteria;p__Bacteroidetes;c__Bacteroidia;o__Flavobacteriales;f__Flavobacteriaceae;g__;s__ | 1 |
| OTU_235 | k__Bacteria;p__Proteobacteria;c__Alphaproteobacteria;o__unidentified_Alphaproteobacteria;f__Acetobacteraceae;g__Acidicaldus;s__ | 0.9 |
| OTU_244 | k__Bacteria;p__Actinobacteria;c__unidentified_Actinobacteria;o__Micrococcales;f__Intrasporangiaceae;g__;s__ | 0.93 |
| OTU_1154 | k__Bacteria;p__Firmicutes;c__Clostridia;o__Clostridiales;f__Ruminococcaceae;g__Ethanoligenens;s__ | 1 |
| OTU_1155 | k__Archaea;p__Thaumarchaeota;c__Nitrososphaeria;o__Nitrososphaerales;f__Nitrososphaeraceae;g__;s__ | 0.93 |
| OTU_1156 | k__Bacteria;p__unidentified_Bacteria;c__unidentified_Bacteria;o__unidentified_Bacteria;f__unidentified_Bacteria;g__unidentified_Bacteria | 0.81 |
| OTU_1157 | k__Bacteria;p__Actinobacteria;c__Acidimicrobiia;o__;f__;g__;s__ | 0.99 |
| OTU_1150 | k__Bacteria;p__Firmicutes;c__Clostridia;o__Clostridiales;f__Ruminococcaceae | 0.88 |
| OTU_1151 | k__Bacteria;p__Chloroflexi;c__Ktedonobacteria;o__Ktedonobacterales;f__;g__;s__ | 0.96 |
| OTU_1152 | k__Bacteria;p__Proteobacteria;c__Gammaproteobacteria;o__Cellvibrionales;f__Porticoccaceae;g__;s__ | 0.94 |
| OTU_1153 | k__Bacteria;p__Chloroflexi;c__Ktedonobacteria;o__Ktedonobacterales;f__;g__;s__ | 0.98 |
| OTU_242 | k__Bacteria;p__Firmicutes;c__Erysipelotrichia;o__Erysipelotrichales;f__Erysipelotrichaceae;g__unidentified_Erysipelotrichaceae;s__[Clostridium]_innocuum | 1 |
| OTU_1158 | k__Bacteria;p__Acidobacteria;c__unidentified_Acidobacteria;o__unidentified_Acidobacteria;f__unidentified_Acidobacteria;g__unidentified_Acidobacteria | 1 |
| OTU_1159 | k__Bacteria;p__Proteobacteria;c__Alphaproteobacteria;o__unidentified_Alphaproteobacteria;f__unidentified_Alphaproteobacteria;g__unidentified_Alphaproteobacteria | 0.92 |
| OTU_243 | k__Bacteria;p__Actinobacteria;c__unidentified_Actinobacteria;o__Pseudonocardiales;f__Pseudonocardiaceae;g__Saccharopolyspora | 0.97 |
| OTU_240 | k__Bacteria;p__Cyanobacteria;c__unidentified_Cyanobacteria;o__unidentified_Cyanobacteria;f__unidentified_Cyanobacteria;g__unidentified_Cyanobacteria | 1 |
| OTU_234 | k__Bacteria;p__Acidobacteria;c__Acidobacteriia;o__;f__;g__;s__ | 0.98 |
| OTU_241 | k__Bacteria;p__Proteobacteria;c__Gammaproteobacteria;o__Salinisphaerales;f__Solimonadaceae;g__Fontimonas;s__ | 0.99 |
| OTU_1039 | k__Bacteria;p__Bacteroidetes;c__Bacteroidia;o__Bacteroidales;f__Tannerellaceae;g__Parabacteroides;s__ | 0.81 |
| OTU_1038 | k__Bacteria;p__Firmicutes;c__Bacilli;o__Lactobacillales;f__Aerococcaceae;g__Aerococcus;s__Aerococcus_viridans | 0.99 |
| OTU_1037 | k__Bacteria;p__Acidobacteria;c__Acidobacteriia;o__Solibacterales;f__unidentified_Solibacterales;g__Candidatus_Solibacter;s__ | 0.94 |
| OTU_1036 | k__Bacteria;p__Proteobacteria;c__Alphaproteobacteria;o__Sphingomonadales;f__Sphingomonadaceae;g__Novosphingobium | 0.89 |
| OTU_1035 | k__Bacteria;p__Verrucomicrobia;c__Verrucomicrobiae;o__Verrucomicrobiales;f__Akkermansiaceae;g__Akkermansia;s__ | 0.95 |
| OTU_1034 | k__Bacteria | 0.97 |
| OTU_1033 | k__Bacteria;p__Proteobacteria;c__Deltaproteobacteria;o__Myxococcales;f__Sandaracinaceae;g__;s__ | 1 |
| OTU_1032 | k__Bacteria;p__Proteobacteria;c__Alphaproteobacteria;o__unidentified_Alphaproteobacteria;f__unidentified_Alphaproteobacteria | 0.93 |
| OTU_1031 | k__Bacteria | 1 |
| OTU_1030 | k__Bacteria;p__Firmicutes;c__Clostridia;o__Clostridiales;f__unidentified_Clostridiales;g__unidentified_Clostridiales;s__Clostridium_sporogenes | 1 |
| OTU_1507 | k__Bacteria;p__Proteobacteria;c__Deltaproteobacteria;o__Oligoflexales;f__;g__;s__ | 0.95 |
| OTU_1779 | k__Bacteria;p__Firmicutes;c__Clostridia;o__Clostridiales;f__Ruminococcaceae;g__unidentified_Ruminococcaceae;s__Clostridium_sp_MC_40 | 0.85 |
| OTU_1506 | k__Bacteria;p__Gemmatimonadetes;c__unidentified_Gemmatimonadetes;o__Gemmatimonadales;f__Gemmatimonadaceae;g__Gemmatimonas;s__ | 1 |
| OTU_1323 | k__Bacteria;p__Proteobacteria;c__Gammaproteobacteria;o__unidentified_Gammaproteobacteria | 1 |
| OTU_1322 | k__Bacteria;p__Verrucomicrobia;c__Verrucomicrobiae;o__;f__;g__;s__ | 0.97 |
| OTU_1321 | k__Bacteria;p__Cyanobacteria;c__unidentified_Cyanobacteria;o__unidentified_Cyanobacteria;f__unidentified_Cyanobacteria;g__unidentified_Cyanobacteria | 0.83 |
| OTU_1320 | k__Bacteria;p__Actinobacteria;c__Acidimicrobiia | 1 |
| OTU_1327 | k__Bacteria;p__Bacteroidetes;c__Bacteroidia;o__Chitinophagales;f__Saprospiraceae;g__unidentified_Saprospiraceae;s__Bacteroidetes_bacterium_OLB8 | 1 |
| OTU_1326 | k__Bacteria | 1 |
| OTU_1325 | k__Archaea;p__Euryarchaeota;c__Methanobacteria;o__Methanobacteriales;f__Methanobacteriaceae | 1 |
| OTU_1324 | k__Bacteria;p__Chloroflexi;c__;o__;f__;g__;s__ | 0.93 |
| OTU_1329 | k__Bacteria;p__Proteobacteria;c__Alphaproteobacteria;o__unidentified_Alphaproteobacteria;f__Acetobacteraceae | 1 |
| OTU_1328 | k__Bacteria;p__Proteobacteria;c__Gammaproteobacteria;o__unidentified_Gammaproteobacteria;f__unidentified_Gammaproteobacteria;g__unidentified_Gammaproteobacteria;s__beta_proteobacterium_JGI_0001003-N18 | 0.99 |
| OTU_1759 | k__Bacteria;p__Firmicutes;c__Clostridia;o__Clostridiales;f__Lachnospiraceae | 1 |
| OTU_1646 | k__Bacteria;p__Firmicutes;c__Clostridia;o__Clostridiales;f__unidentified_Clostridiales;g__unidentified_Clostridiales | 1 |
| OTU_2212 | k__Bacteria;p__Actinobacteria;c__Acidimicrobiia | 0.99 |
| OTU_2213 | k__Bacteria;p__Proteobacteria;c__Alphaproteobacteria;o__Rickettsiales;f__unidentified_Rickettsiales;g__unidentified_Rickettsiales;s__ | 0.99 |
| OTU_2210 | k__Bacteria | 1 |
| OTU_2211 | k__Bacteria | 0.98 |
| OTU_2216 | k__Bacteria;p__Acidobacteria;c__Acidobacteriia;o__Acidobacteriales;f__unidentified_Acidobacteriales;g__Candidatus_Koribacter;s__ | 1 |
| OTU_2217 | k__Bacteria | 1 |
| OTU_2214 | k__Bacteria;p__Proteobacteria;c__Gammaproteobacteria;o__unidentified_Gammaproteobacteria;f__Rhodocyclaceae | 0.99 |
| OTU_2215 | k__Bacteria;p__Firmicutes;c__Clostridia;o__Clostridiales;f__Ruminococcaceae;g__unidentified_Ruminococcaceae | 0.83 |
| OTU_1921 | k__Bacteria;p__Chloroflexi;c__Dehalococcoidia;o__;f__;g__;s__ | 0.82 |
| OTU_1920 | k__Bacteria;p__Actinobacteria;c__Coriobacteriia;o__Coriobacteriales;f__Coriobacteriaceae;g__Collinsella;s__Collinsella_stercoris | 0.89 |
| OTU_2218 | k__Bacteria;p__Acidobacteria;c__Acidobacteriia;o__Solibacterales;f__unidentified_Solibacterales;g__Bryobacter;s__ | 0.9 |
| OTU_1922 | k__Bacteria;p__Firmicutes;c__Erysipelotrichia;o__Erysipelotrichales;f__Erysipelotrichaceae | 0.99 |
| OTU_1925 | k__Bacteria;p__Firmicutes;c__Clostridia;o__Clostridiales;f__Ruminococcaceae | 0.93 |
| OTU_1924 | k__Bacteria;p__unidentified_Bacteria;c__unidentified_Bacteria;o__unidentified_Bacteria;f__unidentified_Bacteria | 0.8 |
| OTU_1927 | k__Bacteria;p__Planctomycetes;c__Phycisphaerae;o__Phycisphaerales;f__Phycisphaeraceae;g__;s__ | 0.94 |
| OTU_1926 | k__Bacteria;p__Candidatus_Yanofskybacteria;c__;o__;f__;g__;s__ | 0.99 |
| OTU_2024 | k__Bacteria;p__Planctomycetes;c__Phycisphaerae;o__Tepidisphaerales;f__;g__;s__ | 1 |
| OTU_2022 | k__Bacteria;p__Bacteroidetes;c__Bacteroidia;o__Bacteroidales;f__Muribaculaceae;g__;s__ | 1 |
| OTU_2366 | k__Bacteria;p__Planctomycetes;c__Phycisphaerae;o__Phycisphaerales;f__Phycisphaeraceae;g__;s__ | 0.98 |
| OTU_2367 | k__Bacteria;p__Firmicutes;c__Clostridia;o__Clostridiales;f__unidentified_Clostridiales;g__Tissierella;s__ | 1 |
| OTU_2364 | k__Bacteria;p__Firmicutes;c__Clostridia;o__Clostridiales;f__Lachnospiraceae | 1 |
| OTU_2365 | k__Bacteria;p__Planctomycetes;c__Planctomycetacia;o__unidentified_Planctomycetacia;f__Gemmataceae;g__;s__ | 0.99 |
| OTU_2362 | k__Bacteria;p__Proteobacteria;c__Alphaproteobacteria;o__unidentified_Alphaproteobacteria;f__unidentified_Alphaproteobacteria;g__Inquilinus | 1 |
| OTU_1818 | k__Bacteria;p__Proteobacteria;c__Alphaproteobacteria;o__Rickettsiales;f__;g__;s__ | 0.92 |
| OTU_2360 | k__Bacteria;p__Chloroflexi;c__Dehalococcoidia;o__;f__;g__;s__ | 0.82 |
| OTU_2361 | k__Bacteria;p__Proteobacteria;c__Gammaproteobacteria;o__Cellvibrionales;f__Cellvibrionaceae;g__Cellvibrio;s__ | 0.95 |
| OTU_1815 | k__Bacteria;p__Proteobacteria;c__Alphaproteobacteria;o__unidentified_Alphaproteobacteria;f__unidentified_Alphaproteobacteria;g__Reyranella | 1 |
| OTU_1814 | k__Bacteria;p__Proteobacteria;c__Alphaproteobacteria;o__Rhizobiales;f__Hyphomicrobiaceae;g__Hyphomicrobium;s__ | 0.99 |
| OTU_1817 | k__Bacteria;p__Proteobacteria;c__Alphaproteobacteria;o__Rhizobiales | 0.83 |
| OTU_1816 | k__Bacteria;p__Armatimonadetes;c__Armatimonadia;o__Armatimonadales;f__;g__;s__ | 1 |
| OTU_1811 | k__Bacteria;p__Firmicutes;c__Clostridia;o__Clostridiales;f__Lachnospiraceae | 1 |
| OTU_1810 | k__Bacteria;p__Actinobacteria;c__Acidimicrobiia;o__;f__;g__;s__ | 0.98 |
| OTU_1813 | k__Bacteria;p__Proteobacteria;c__Deltaproteobacteria | 0.84 |
| OTU_1812 | k__Bacteria;p__Firmicutes;c__Clostridia;o__Clostridiales;f__Lachnospiraceae;g__Anaerosporobacter;s__Clostridiales_bacterium_77-5d | 1 |
| OTU_2548 | k__Bacteria;p__Chloroflexi;c__Chloroflexia;o__Thermomicrobiales;f__;g__;s__ | 0.95 |
| OTU_2549 | k__Bacteria;p__Actinobacteria;c__Coriobacteriia;o__Coriobacteriales;f__Coriobacteriaceae;g__Collinsella | 0.94 |
| OTU_2546 | k__Bacteria | 1 |
| OTU_2547 | k__Bacteria;p__Proteobacteria;c__Alphaproteobacteria;o__unidentified_Alphaproteobacteria;f__Kiloniellaceae | 0.92 |
| OTU_2544 | k__Bacteria;p__Gemmatimonadetes;c__;o__;f__;g__;s__ | 0.98 |
| OTU_2545 | k__Bacteria;p__Fibrobacteres;c__Fibrobacteria;o__Fibrobacterales;f__Fibrobacteraceae;g__unidentified_Fibrobacteraceae;s__Juncus_effusus | 0.91 |
| OTU_2542 | k__Bacteria;p__Proteobacteria;c__Deltaproteobacteria;o__Myxococcales | 0.99 |
| OTU_2543 | k__Bacteria;p__Proteobacteria;c__Gammaproteobacteria;o__unidentified_Gammaproteobacteria;f__unidentified_Gammaproteobacteria;g__Acidibacter | 1 |
| OTU_2540 | k__Bacteria;p__Firmicutes;c__Bacilli;o__Lactobacillales;f__Enterococcaceae;g__Enterococcus;s__Enterococcus_aquimarinus | 0.83 |
| OTU_2541 | k__Bacteria;p__Actinobacteria;c__Coriobacteriia;o__Coriobacteriales;f__Eggerthellaceae;g__Eggerthella;s__ | 1 |
| OTU_2916 | k__Bacteria;p__Bacteroidetes;c__Bacteroidia;o__Flavobacteriales;f__Flavobacteriaceae | 1 |
| OTU_656 | k__Bacteria;p__Actinobacteria;c__Thermoleophilia;o__Gaiellales;f__Gaiellaceae;g__Gaiella;s__ | 0.92 |
| OTU_2148 | k__Bacteria;p__Acidobacteria;c__Acidobacteriia;o__Acidobacteriales | 1 |
| OTU_2149 | k__Bacteria;p__Armatimonadetes;c__;o__;f__;g__;s__ | 0.99 |
| OTU_2142 | k__Bacteria;p__unidentified_Bacteria;c__unidentified_Bacteria;o__unidentified_Bacteria;f__unidentified_Bacteria;g__unidentified_Bacteria | 0.85 |
| OTU_2143 | k__Bacteria;p__Proteobacteria;c__Deltaproteobacteria;o__Desulfovibrionales;f__Desulfovibrionaceae | 1 |
| OTU_2140 | k__Bacteria;p__Bacteroidetes;c__Bacteroidia;o__Chitinophagales;f__Saprospiraceae | 1 |
| OTU_2141 | k__Bacteria;p__Firmicutes;c__Bacilli;o__Bacillales;f__Bacillaceae;g__Terribacillus | 0.98 |
| OTU_2146 | k__Bacteria;p__Actinobacteria;c__Thermoleophilia;o__Gaiellales;f__;g__;s__ | 1 |
| OTU_2147 | k__Bacteria;p__Bacteroidetes;c__Bacteroidia;o__Flavobacteriales;f__Flavobacteriaceae;g__Flavobacterium | 1 |
| OTU_2144 | k__Bacteria;p__Bacteroidetes;c__Bacteroidia;o__Chitinophagales;f__Chitinophagaceae | 1 |
| OTU_2145 | k__Bacteria;p__Firmicutes;c__Clostridia;o__Clostridiales;f__Lachnospiraceae;g__unidentified_Lachnospiraceae | 0.88 |
| OTU_556 | k__Bacteria;p__Actinobacteria;c__unidentified_Actinobacteria;o__Corynebacteriales;f__Nocardiaceae;g__Rhodococcus;s__Rhodococcus_fascians | 1 |
| OTU_557 | k__Bacteria;p__Proteobacteria;c__Gammaproteobacteria;o__unidentified_Gammaproteobacteria | 0.88 |
| OTU_554 | k__Bacteria;p__Firmicutes;c__Bacilli;o__Bacillales;f__Staphylococcaceae;g__Nosocomiicoccus;s__ | 1 |
| OTU_555 | k__Bacteria;p__Proteobacteria;c__Gammaproteobacteria;o__Pseudomonadales;f__Pseudomonadaceae | 0.93 |
| OTU_552 | k__Bacteria;p__Firmicutes;c__Clostridia;o__Clostridiales;f__Ruminococcaceae | 0.99 |
| OTU_553 | k__Bacteria;p__Fibrobacteres;c__Fibrobacteria;o__Fibrobacterales;f__Fibrobacteraceae;g__unidentified_Fibrobacteraceae;s__Juncus_effusus | 1 |
| OTU_550 | k__Bacteria;p__Firmicutes;c__Bacilli;o__Bacillales;f__Paenibacillaceae;g__Ammoniphilus;s__ | 0.87 |
| OTU_551 | k__Bacteria;p__Chloroflexi | 0.9 |
| OTU_558 | k__Bacteria;p__Bacteroidetes;c__Bacteroidia;o__Bacteroidales;f__;g__;s__ | 1 |
| OTU_559 | k__Bacteria;p__Proteobacteria;c__Alphaproteobacteria;o__unidentified_Alphaproteobacteria;f__Acetobacteraceae | 1 |
| OTU_1465 | k__Bacteria;p__Firmicutes;c__Negativicutes;o__Selenomonadales;f__Acidaminococcaceae;g__Acidaminococcus;s__ | 0.95 |
| OTU_2780 | k__Bacteria;p__Firmicutes;c__Clostridia;o__Clostridiales;f__Peptostreptococcaceae;g__Romboutsia;s__ | 0.95 |
| OTU_2616 | k__Bacteria;p__Cyanobacteria;c__unidentified_Cyanobacteria;o__unidentified_Cyanobacteria;f__unidentified_Cyanobacteria;g__unidentified_Cyanobacteria | 1 |
| OTU_158 | k__Bacteria;p__Spirochaetes;c__Spirochaetia;o__Brevinematales;f__Brevinemataceae;g__Brevinema;s__Brevinema_andersonii | 0.94 |
| OTU_159 | k__Bacteria;p__Actinobacteria;c__unidentified_Actinobacteria;o__Actinomycetales;f__Actinomycetaceae;g__Actinomyces;s__Actinomyces_naeslundii | 0.91 |
| OTU_69 | k__Bacteria;p__Bacteroidetes;c__Bacteroidia;o__Bacteroidales | 0.99 |
| OTU_68 | k__Bacteria;p__Firmicutes;c__Clostridia;o__Clostridiales;f__Lachnospiraceae;g__Roseburia | 0.98 |
| OTU_2786 | k__Bacteria;p__Proteobacteria;c__Alphaproteobacteria;o__Caulobacterales;f__Hyphomonadaceae | 1 |
| OTU_2617 | k__Bacteria;p__Proteobacteria;c__Gammaproteobacteria;o__Pseudomonadales;f__Pseudomonadaceae;g__Pseudomonas | 1 |
| OTU_65 | k__Bacteria;p__Fusobacteria;c__Fusobacteriia;o__Fusobacteriales;f__Fusobacteriaceae;g__Fusobacterium | 0.99 |
| OTU_153 | k__Bacteria;p__Proteobacteria;c__Alphaproteobacteria;o__Sphingomonadales;f__Sphingomonadaceae;g__Qipengyuania;s__ | 1 |
| OTU_67 | k__Bacteria;p__Firmicutes;c__Bacilli;o__Lactobacillales;f__Streptococcaceae;g__Lactococcus;s__ | 0.82 |
| OTU_66 | k__Bacteria;p__Bacteroidetes;c__Bacteroidia;o__Flavobacteriales;f__Flavobacteriaceae;g__unidentified_Flavobacteriaceae;s__bacterium_WHC3-2 | 0.99 |
| OTU_156 | k__Bacteria;p__Firmicutes;c__Erysipelotrichia;o__Erysipelotrichales;f__Erysipelotrichaceae;g__Dubosiella;s__ | 1 |
| OTU_60 | k__Bacteria;p__Proteobacteria;c__Gammaproteobacteria;o__unidentified_Gammaproteobacteria;f__Burkholderiaceae;g__Ralstonia | 0.99 |
| OTU_63 | k__Bacteria;p__Firmicutes;c__Bacilli;o__Bacillales;f__Staphylococcaceae;g__Staphylococcus;s__Staphylococcus_warneri | 1 |
| OTU_62 | k__Bacteria;p__Proteobacteria;c__Gammaproteobacteria;o__Enterobacteriales;f__Enterobacteriaceae;g__Edwardsiella;s__ | 1 |
| OTU_880 | k__Bacteria;p__Acidobacteria;c__unidentified_Acidobacteria;o__unidentified_Acidobacteria;f__unidentified_Acidobacteria;g__unidentified_Acidobacteria | 0.89 |
| OTU_881 | k__Bacteria | 1 |
| OTU_882 | k__Bacteria;p__Proteobacteria;c__Alphaproteobacteria;o__Sphingomonadales;f__Sphingomonadaceae;g__Sphingomonas;s__Sphingomonas_koreensis | 0.96 |
| OTU_883 | k__Bacteria;p__Firmicutes;c__Clostridia;o__Clostridiales;f__Peptostreptococcaceae;g__Peptostreptococcus | 1 |
| OTU_884 | k__Bacteria;p__Acidobacteria | 1 |
| OTU_885 | k__Bacteria;p__Rokubacteria;c__;o__;f__;g__;s__ | 1 |
| OTU_334 | k__Bacteria;p__Chloroflexi;c__Ktedonobacteria;o__Ktedonobacterales;f__;g__;s__ | 0.92 |
| OTU_335 | k__Bacteria;p__Actinobacteria;c__unidentified_Actinobacteria;o__Micromonosporales;f__Micromonosporaceae;g__Actinoplanes | 0.94 |
| OTU_888 | k__Bacteria;p__Firmicutes;c__Bacilli;o__Lactobacillales;f__Streptococcaceae;g__Lactococcus | 0.99 |
| OTU_889 | k__Bacteria;p__Proteobacteria;c__Deltaproteobacteria;o__Myxococcales;f__Haliangiaceae;g__Haliangium;s__ | 1 |
| OTU_338 | k__Bacteria;p__Proteobacteria;c__Gammaproteobacteria;o__unidentified_Gammaproteobacteria | 0.81 |
| OTU_339 | k__Bacteria;p__Firmicutes;c__Clostridia;o__Clostridiales;f__Ruminococcaceae | 1 |
| OTU_2613 | k__Bacteria;p__Proteobacteria;c__Gammaproteobacteria;o__unidentified_Gammaproteobacteria;f__Burkholderiaceae;g__Lautropia;s__ | 0.91 |
| OTU_2610 | k__Bacteria;p__Firmicutes;c__Clostridia;o__Clostridiales | 0.96 |
| OTU_2611 | k__Bacteria;p__Firmicutes;c__Negativicutes;o__Selenomonadales;f__Veillonellaceae;g__Megamonas;s__ | 0.85 |
| OTU_2968 | k__Bacteria;p__Proteobacteria;c__Gammaproteobacteria;o__Enterobacteriales;f__Enterobacteriaceae;g__Buchnera;s__ | 1 |
| OTU_2969 | k__Bacteria;p__Armatimonadetes;c__Chthonomonadetes;o__Chthonomonadales;f__Chthonomonadaceae;g__Chthonomonas;s__ | 1 |
| OTU_2964 | k__Bacteria;p__Chlamydiae;c__unidentified_Chlamydiae;o__Chlamydiales;f__Parachlamydiaceae | 0.98 |
| OTU_2965 | k__Bacteria;p__Actinobacteria;c__unidentified_Actinobacteria;o__Corynebacteriales;f__Tsukamurellaceae;g__Tsukamurella | 1 |
| OTU_2966 | k__Bacteria;p__Bacteroidetes;c__Bacteroidia;o__Bacteroidales;f__Paludibacteraceae;g__Paludibacter;s__ | 0.98 |
| OTU_2967 | k__Bacteria;p__Firmicutes;c__Clostridia;o__Clostridiales;f__Ruminococcaceae;g__unidentified_Ruminococcaceae | 1 |
| OTU_2960 | k__Bacteria | 1 |
| OTU_2961 | k__Bacteria;p__Verrucomicrobia;c__Verrucomicrobiae;o__Verrucomicrobiales | 0.97 |
| OTU_2962 | k__Bacteria | 1 |
| OTU_2963 | k__Bacteria;p__Proteobacteria;c__Gammaproteobacteria;o__Xanthomonadales;f__Xanthomonadaceae;g__Luteimonas | 0.95 |
| OTU_806 | k__Bacteria;p__Bacteroidetes;c__Bacteroidia;o__Bacteroidales;f__Prevotellaceae;g__unidentified_Prevotellaceae;s__Prevotella_dentalis | 1 |
| OTU_428 | k__Bacteria;p__Fusobacteria;c__Fusobacteriia;o__Fusobacteriales;f__Fusobacteriaceae | 1 |
| OTU_429 | k__Bacteria;p__Proteobacteria;c__Deltaproteobacteria;o__Myxococcales | 1 |
| OTU_426 | k__Bacteria;p__Acidobacteria;c__Acidobacteriia;o__Acidobacteriales;f__unidentified_Acidobacteriales;g__Candidatus_Koribacter;s__ | 1 |
| OTU_427 | k__Bacteria;p__Chloroflexi;c__Anaerolineae;o__Anaerolineales;f__Anaerolineaceae | 1 |
| OTU_424 | k__Bacteria;p__Verrucomicrobia;c__Verrucomicrobiae | 1 |
| OTU_425 | k__Bacteria;p__Chloroflexi;c__Ktedonobacteria;o__Ktedonobacterales;f__;g__;s__ | 0.91 |
| OTU_422 | k__Bacteria;p__Proteobacteria;c__Alphaproteobacteria;o__Rhizobiales;f__Rhizobiaceae;g__unidentified_Rhizobiaceae | 0.99 |
| OTU_423 | k__Bacteria;p__Bacteroidetes;c__Bacteroidia;o__Sphingobacteriales;f__Sphingobacteriaceae;g__Mucilaginibacter;s__ | 0.91 |
| OTU_420 | k__Bacteria;p__Firmicutes;c__Bacilli;o__Bacillales;f__Bacillaceae;g__Sinibacillus;s__ | 0.99 |
| OTU_421 | k__Bacteria;p__Proteobacteria;c__Alphaproteobacteria;o__unidentified_Alphaproteobacteria;f__unidentified_Alphaproteobacteria | 0.98 |
| OTU_1491 | k__Bacteria;p__Bacteroidetes;c__Bacteroidia;o__Bacteroidales;f__Rikenellaceae;g__Alistipes;s__ | 1 |
| OTU_1490 | k__Bacteria;p__Proteobacteria;c__Gammaproteobacteria;o__unidentified_Gammaproteobacteria;f__Burkholderiaceae;g__Parasutterella;s__ | 1 |
| OTU_1493 | k__Bacteria;p__Chloroflexi;c__Anaerolineae;o__Anaerolineales;f__Anaerolineaceae;g__;s__ | 0.9 |
| OTU_1492 | k__Bacteria;p__Proteobacteria;c__Deltaproteobacteria;o__Myxococcales;f__Archangiaceae;g__Anaeromyxobacter;s__Anaeromyxobacter_sp_Fw109-5 | 0.92 |
| OTU_1495 | k__Bacteria;p__Proteobacteria;c__Alphaproteobacteria | 0.84 |
| OTU_1494 | k__Bacteria;p__unidentified_Bacteria;c__unidentified_Bacteria;o__unidentified_Bacteria;f__unidentified_Bacteria;g__unidentified_Bacteria | 1 |
| OTU_1497 | k__Bacteria;p__Firmicutes;c__Negativicutes;o__Selenomonadales;f__Veillonellaceae;g__Dialister;s__Dialister_pneumosintes | 0.98 |
| OTU_1496 | k__Bacteria;p__Firmicutes;c__Clostridia;o__Clostridiales;f__Lachnospiraceae | 0.91 |
| OTU_1499 | k__Bacteria;p__Chloroflexi;c__Anaerolineae;o__Anaerolineales;f__Anaerolineaceae | 0.99 |
| OTU_1498 | k__Bacteria | 1 |
| OTU_245 | k__Bacteria;p__Firmicutes;c__Clostridia;o__Clostridiales;f__unidentified_Clostridiales;g__Candidatus_Arthromitus | 1 |
| OTU_759 | k__Bacteria;p__Acidobacteria;c__Acidobacteriia;o__;f__;g__;s__ | 0.99 |
| OTU_1147 | k__Bacteria;p__Gemmatimonadetes;c__unidentified_Gemmatimonadetes;o__Gemmatimonadales;f__Gemmatimonadaceae;g__;s__ | 1 |
| OTU_1146 | k__Bacteria;p__Proteobacteria;c__Gammaproteobacteria;o__Cellvibrionales;f__Halieaceae | 0.95 |
| OTU_1145 | k__Archaea;p__Thaumarchaeota;c__Nitrososphaeria;o__unidentified_Nitrososphaeria;f__unidentified_Nitrososphaeria;g__Candidatus_Nitrosotalea;s__ | 1 |
| OTU_1144 | k__Bacteria;p__Proteobacteria;c__Deltaproteobacteria | 0.97 |
| OTU_1143 | k__Bacteria;p__Proteobacteria;c__Alphaproteobacteria;o__Rhizobiales;f__Hyphomicrobiaceae;g__Pedomicrobium;s__ | 0.97 |
| OTU_1142 | k__Bacteria;p__Proteobacteria;c__Gammaproteobacteria;o__Pseudomonadales;f__Pseudomonadaceae;g__Pseudomonas | 1 |
| OTU_1141 | k__Bacteria;p__Proteobacteria;c__Gammaproteobacteria;o__Pseudomonadales;f__Pseudomonadaceae;g__Pseudomonas;s__Pseudomonas_xinjiangensis | 0.97 |
| OTU_1140 | k__Bacteria;p__Actinobacteria;c__unidentified_Actinobacteria;o__Streptomycetales;f__Streptomycetaceae;g__Streptomyces | 0.97 |
| OTU_1149 | k__Bacteria;p__Firmicutes;c__Negativicutes;o__Selenomonadales;f__Veillonellaceae | 1 |
| OTU_1148 | k__Bacteria | 0.99 |
| OTU_893 | k__Archaea;p__Euryarchaeota;c__Methanobacteria;o__Methanobacteriales;f__Methanobacteriaceae;g__Methanobrevibacter;s__ | 0.99 |
| OTU_1002 | k__Bacteria;p__Spirochaetes;c__unidentified_Spirochaetes;o__unidentified_Spirochaetes;f__Leptospiraceae;g__Leptonema;s__ | 1 |
| OTU_1003 | k__Bacteria;p__Planctomycetes;c__Planctomycetacia;o__unidentified_Planctomycetacia;f__Gemmataceae;g__;s__ | 0.95 |
| OTU_1000 | k__Bacteria;p__Proteobacteria;c__Gammaproteobacteria;o__unidentified_Gammaproteobacteria;f__unidentified_Gammaproteobacteria;g__Acidibacter;s__ | 1 |
| OTU_1001 | k__Bacteria;p__Proteobacteria;c__Alphaproteobacteria;o__Caulobacterales;f__Caulobacteraceae;g__Phenylobacterium;s__Phenylobacterium_sp | 0.88 |
| OTU_1006 | k__Bacteria;p__Proteobacteria;c__Gammaproteobacteria;o__Pseudomonadales;f__Pseudomonadaceae;g__Pseudomonas | 1 |
| OTU_1007 | k__Bacteria;p__Actinobacteria;c__unidentified_Actinobacteria;o__Frankiales;f__Acidothermaceae;g__Acidothermus | 1 |
| OTU_1004 | k__Bacteria;p__Bacteroidetes;c__Bacteroidia;o__Chitinophagales;f__Chitinophagaceae;g__Ferruginibacter;s__ | 0.98 |
| OTU_1005 | k__Bacteria;p__Verrucomicrobia;c__Verrucomicrobiae;o__Chthoniobacterales;f__unidentified_Chthoniobacterales;g__Candidatus_Xiphinematobacter;s__ | 1 |
| OTU_1008 | k__Bacteria;p__Proteobacteria;c__Alphaproteobacteria;o__unidentified_Alphaproteobacteria;f__Acetobacteraceae | 1 |
| OTU_1009 | k__Bacteria;p__Verrucomicrobia;c__Verrucomicrobiae;o__Verrucomicrobiales;f__Verrucomicrobiaceae;g__Roseimicrobium;s__Roseimicrobium_gellanilyticum | 0.86 |
| OTU_2058 | k__Bacteria;p__Cyanobacteria;c__unidentified_Cyanobacteria;o__unidentified_Cyanobacteria;f__unidentified_Cyanobacteria;g__unidentified_Cyanobacteria;s__bacterium_WHC4-8 | 0.99 |
| OTU_892 | k__Bacteria;p__Chloroflexi;c__Ktedonobacteria;o__Ktedonobacterales;f__Ktedonobacteraceae;g__;s__ | 0.96 |
| OTU_2059 | k__Bacteria;p__Proteobacteria;c__Alphaproteobacteria;o__Rhodospirillales;f__unidentified_Rhodospirillales;g__unidentified_Rhodospirillales;s__Pelagibacteraceae_bacterium_ETNP-OMZ-SAG-A7 | 0.88 |
| OTU_2508 | k__Bacteria;p__Verrucomicrobia;c__Verrucomicrobiae;o__;f__;g__;s__ | 0.89 |
| OTU_790 | k__Bacteria;p__Proteobacteria;c__Gammaproteobacteria;o__unidentified_Gammaproteobacteria;f__Burkholderiaceae;g__Alcaligenes;s__ | 0.91 |
| OTU_2509 | k__Bacteria;p__Chloroflexi;c__Chloroflexia;o__Thermomicrobiales;f__;g__;s__ | 1 |
| OTU_891 | k__Bacteria;p__Bacteroidetes;c__Bacteroidia;o__Bacteroidales;f__Prevotellaceae | 1 |
| OTU_2502 | k__Bacteria;p__Firmicutes;c__Clostridia;o__Clostridiales;f__Lachnospiraceae;g__unidentified_Lachnospiraceae;s__Clostridiales_bacterium_CIEAF_020 | 0.96 |
| OTU_2051 | k__Bacteria;p__Verrucomicrobia;c__Verrucomicrobiae;o__Verrucomicrobiales;f__;g__;s__ | 1 |
| OTU_3059 | k__Bacteria;p__Cyanobacteria;c__unidentified_Cyanobacteria;o__unidentified_Cyanobacteria;f__unidentified_Cyanobacteria;g__unidentified_Cyanobacteria;s__Euglena_gracilis | 1 |
| OTU_1316 | k__Bacteria;p__Firmicutes;c__Clostridia;o__Clostridiales;f__unidentified_Clostridiales;g__Sedimentibacter | 1 |
| OTU_1317 | k__Bacteria;p__Bacteroidetes;c__Bacteroidia;o__Bacteroidales;f__Muribaculaceae;g__;s__ | 0.91 |
| OTU_1314 | k__Bacteria;p__Firmicutes;c__Clostridia;o__Clostridiales;f__Lachnospiraceae | 0.97 |
| OTU_1315 | k__Bacteria;p__Cyanobacteria;c__unidentified_Cyanobacteria;o__Nostocales;f__Nostocaceae;g__unidentified_Nostocaceae;s__Calothrix_sp_PCC_7103 | 0.8 |
| OTU_1312 | k__Bacteria | 1 |
| OTU_1313 | k__Bacteria;p__Chloroflexi;c__Ktedonobacteria;o__Ktedonobacterales;f__Ktedonobacteraceae;g__;s__ | 0.99 |
| OTU_1310 | k__Bacteria;p__Actinobacteria;c__Thermoleophilia;o__Solirubrobacterales;f__Solirubrobacteraceae;g__Parviterribacter;s__ | 0.99 |
| OTU_1311 | k__Bacteria;p__Bacteroidetes;c__Bacteroidia;o__Flavobacteriales;f__Flavobacteriaceae;g__Mesonia;s__Mesonia_algae | 1 |
| OTU_2054 | k__Bacteria;p__unidentified_Bacteria;c__unidentified_Bacteria;o__unidentified_Bacteria;f__unidentified_Bacteria;g__unidentified_Bacteria | 0.94 |
| OTU_1318 | k__Bacteria;p__Bacteroidetes;c__Bacteroidia;o__Bacteroidales;f__Prevotellaceae | 0.9 |
| OTU_1319 | k__Bacteria;p__Bacteroidetes;c__Bacteroidia;o__Chitinophagales;f__Chitinophagaceae | 0.99 |
| OTU_2056 | k__Bacteria;p__Firmicutes;c__Clostridia;o__Clostridiales | 0.82 |
| OTU_2057 | k__Bacteria;p__Firmicutes;c__Clostridia;o__Clostridiales | 0.89 |
| OTU_606 | k__Bacteria;p__Firmicutes;c__Clostridia;o__Clostridiales;f__unidentified_Clostridiales;g__Sarcina;s__ | 1 |
| OTU_607 | k__Bacteria;p__Acidobacteria;c__Acidobacteriia;o__Solibacterales;f__unidentified_Solibacterales;g__Bryobacter;s__ | 1 |
| OTU_769 | k__Bacteria | 1 |
| OTU_768 | k__Bacteria;p__Chloroflexi;c__Ktedonobacteria;o__Ktedonobacterales;f__;g__;s__ | 0.98 |
| OTU_2205 | k__Bacteria;p__Proteobacteria;c__Alphaproteobacteria;o__Rhizobiales;f__Rhizobiaceae;g__Oricola;s__Oricola_cellulosilytica | 0.83 |
| OTU_2204 | k__Bacteria;p__Proteobacteria;c__Gammaproteobacteria;o__unidentified_Gammaproteobacteria;f__Burkholderiaceae;g__Kerstersia;s__ | 0.99 |
| OTU_2207 | k__Bacteria;p__Proteobacteria;c__Gammaproteobacteria;o__unidentified_Gammaproteobacteria;f__unidentified_Gammaproteobacteria;g__Acidibacter;s__ | 1 |
| OTU_2206 | k__Bacteria;p__Proteobacteria;c__Alphaproteobacteria;o__Rhodobacterales;f__Rhodobacteraceae | 0.95 |
| OTU_1958 | k__Bacteria;p__Chloroflexi;c__Anaerolineae;o__;f__;g__;s__ | 0.98 |
| OTU_1959 | k__Bacteria;p__Bacteroidetes;c__Bacteroidia;o__Flavobacteriales;f__Flavobacteriaceae;g__;s__ | 0.96 |
| OTU_2203 | k__Bacteria;p__Firmicutes;c__Erysipelotrichia;o__Erysipelotrichales;f__Erysipelotrichaceae;g__Catenisphaera;s__ | 0.95 |
| OTU_2202 | k__Bacteria;p__Proteobacteria;c__Gammaproteobacteria;o__Salinisphaerales;f__Solimonadaceae;g__Nevskia | 1 |
| OTU_1954 | k__Bacteria;p__Bacteroidetes;c__Bacteroidia;o__Chitinophagales | 0.86 |
| OTU_1955 | k__Bacteria;p__Actinobacteria;c__Thermoleophilia;o__Solirubrobacterales;f__;g__;s__ | 1 |
| OTU_1956 | k__Bacteria;p__Bacteroidetes;c__Bacteroidia;o__Bacteroidales | 0.81 |
| OTU_1957 | k__Bacteria;p__Chloroflexi;c__Chloroflexia;o__Thermomicrobiales;f__;g__;s__ | 0.99 |
| OTU_1950 | k__Bacteria;p__Actinobacteria;c__Acidimicrobiia | 0.96 |
| OTU_1951 | k__Bacteria;p__Proteobacteria;c__Gammaproteobacteria;o__unidentified_Gammaproteobacteria;f__unidentified_Gammaproteobacteria;g__Acidibacter;s__ | 0.99 |
| OTU_1952 | k__Bacteria;p__Proteobacteria;c__Alphaproteobacteria;o__unidentified_Alphaproteobacteria;f__Geminicoccaceae;g__Candidatus_Alysiosphaera;s__ | 1 |
| OTU_1953 | k__Bacteria;p__Actinobacteria;c__Coriobacteriia;o__;f__;g__;s__ | 1 |
| OTU_767 | k__Bacteria;p__Bacteroidetes;c__Bacteroidia;o__Cytophagales;f__Spirosomaceae;g__Arsenicibacter;s__Cenchrus_americanus | 1 |
| OTU_766 | k__Bacteria;p__Firmicutes;c__Clostridia;o__Clostridiales;f__Lachnospiraceae;g__;s__ | 0.83 |
| OTU_194 | k__Bacteria;p__Proteobacteria;c__Alphaproteobacteria;o__Rhizobiales | 1 |
| OTU_936 | k__Bacteria;p__Proteobacteria;c__Alphaproteobacteria | 0.95 |
| OTU_1658 | k__Bacteria;p__Proteobacteria;c__Gammaproteobacteria;o__Vibrionales;f__Vibrionaceae;g__;s__ | 0.97 |
| OTU_1567 | k__Bacteria;p__Proteobacteria;c__Gammaproteobacteria;o__Pseudomonadales;f__Moraxellaceae;g__Acinetobacter | 1 |
| OTU_1566 | k__Bacteria;p__Firmicutes;c__Bacilli;o__Bacillales;f__Bacillaceae | 1 |
| OTU_2379 | k__Bacteria;p__Proteobacteria;c__Gammaproteobacteria;o__Alteromonadales;f__Alteromonadaceae;g__Aestuariibacter | 0.97 |
| OTU_2378 | k__Bacteria;p__Firmicutes;c__Clostridia;o__Clostridiales;f__Lachnospiraceae;g__Lachnoanaerobaculum;s__ | 0.82 |
| OTU_2371 | k__Bacteria;p__Firmicutes;c__Clostridia;o__Clostridiales;f__Ruminococcaceae | 0.84 |
| OTU_2370 | k__Bacteria | 1 |
| OTU_2373 | k__Bacteria;p__Firmicutes;c__Clostridia;o__Clostridiales;f__unidentified_Clostridiales;g__Peptoniphilus;s__Peptoniphilus_sp_EL1 | 0.97 |
| OTU_2372 | k__Archaea;p__Euryarchaeota;c__Thermoplasmata;o__;f__;g__;s__ | 0.93 |
| OTU_2375 | k__Bacteria;p__Proteobacteria;c__Alphaproteobacteria;o__Rhizobiales;f__Rhizobiaceae | 0.98 |
| OTU_2374 | k__Bacteria;p__Proteobacteria;c__Gammaproteobacteria;o__Xanthomonadales | 0.83 |
| OTU_2377 | k__Bacteria;p__Bacteroidetes;c__Bacteroidia;o__Bacteroidales;f__Rikenellaceae;g__Alistipes | 1 |
| OTU_2376 | k__Bacteria;p__Firmicutes | 0.92 |
| OTU_2551 | k__Bacteria;p__unidentified_Bacteria;c__unidentified_Bacteria;o__Campylobacterales;f__Helicobacteraceae;g__Helicobacter | 1 |
| OTU_2550 | k__Bacteria;p__Chloroflexi;c__Anaerolineae;o__Anaerolineales;f__Anaerolineaceae | 0.87 |
| OTU_2553 | k__Bacteria;p__Acidobacteria;c__Acidobacteriia;o__Acidobacteriales;f__unidentified_Acidobacteriales;g__Acidipila | 0.82 |
| OTU_2552 | k__Bacteria;p__Proteobacteria;c__Gammaproteobacteria;o__Oceanospirillales;f__Alcanivoracaceae;g__Alcanivorax | 0.89 |
| OTU_2555 | k__Bacteria;p__Firmicutes;c__Clostridia;o__Clostridiales;f__Lachnospiraceae | 1 |
| OTU_2554 | k__Bacteria;p__Actinobacteria;c__Acidimicrobiia;o__;f__;g__;s__ | 0.97 |
| OTU_2557 | k__Bacteria;p__Proteobacteria;c__Gammaproteobacteria;o__unidentified_Gammaproteobacteria;f__Nitrosomonadaceae;g__;s__ | 0.96 |
| OTU_2556 | k__Bacteria;p__Chlamydiae;c__unidentified_Chlamydiae;o__Chlamydiales;f__Chlamydiaceae;g__Chlamydia | 1 |
| OTU_2559 | k__Bacteria;p__Acidobacteria;c__unidentified_Acidobacteria;o__unidentified_Acidobacteria;f__unidentified_Acidobacteria;g__Stenotrophobacter;s__ | 0.95 |
| OTU_938 | k__Bacteria;p__Actinobacteria;c__Acidimicrobiia;o__;f__;g__;s__ | 0.98 |
| OTU_939 | k__Bacteria;p__Proteobacteria;c__Alphaproteobacteria;o__unidentified_Alphaproteobacteria;f__Acetobacteraceae | 1 |
| OTU_564 | k__Bacteria;p__Proteobacteria;c__Alphaproteobacteria;o__unidentified_Alphaproteobacteria;f__Acetobacteraceae;g__Rhodovarius;s__Rhodovarius_sp_CCP-6 | 0.95 |
| OTU_2159 | k__Bacteria;p__Proteobacteria;c__Alphaproteobacteria;o__Rickettsiales | 0.9 |
| OTU_2158 | k__Bacteria;p__Proteobacteria;c__Deltaproteobacteria;o__Desulfarculales;f__Desulfarculaceae;g__;s__ | 0.98 |
| OTU_2155 | k__Bacteria;p__Proteobacteria;c__Deltaproteobacteria;o__Myxococcales;f__;g__;s__ | 1 |
| OTU_2154 | k__Archaea;p__Thaumarchaeota;c__Nitrososphaeria;o__Nitrosopumilales;f__Nitrosopumilaceae;g__Candidatus_Nitrosoarchaeum;s__ | 1 |
| OTU_2157 | k__Bacteria;p__Bacteroidetes;c__Ignavibacteria;o__;f__;g__;s__ | 0.82 |
| OTU_2156 | k__Bacteria;p__Rokubacteria;c__;o__;f__;g__;s__ | 1 |
| OTU_2151 | k__Bacteria;p__Actinobacteria;c__unidentified_Actinobacteria;o__Propionibacteriales;f__Propionibacteriaceae;g__Micropruina;s__ | 1 |
| OTU_2150 | k__Bacteria | 1 |
| OTU_2153 | k__Bacteria;p__Proteobacteria;c__Alphaproteobacteria;o__Rhodospirillales;f__;g__;s__ | 0.93 |
| OTU_2152 | k__Bacteria;p__Bacteroidetes;c__Rhodothermia;o__Rhodothermales;f__Rhodothermaceae;g__;s__ | 0.97 |
| OTU_407 | k__Bacteria;p__Gracilibacteria;c__unidentified_Gracilibacteria;o__unidentified_Gracilibacteria;f__unidentified_Gracilibacteria;g__unidentified_Gracilibacteria;s__SR1_bacterium_oral_taxon_875 | 1 |
| OTU_1847 | k__Bacteria;p__Tenericutes;c__Mollicutes;o__;f__;g__;s__ | 1 |
| OTU_743 | k__Bacteria;p__Firmicutes;c__Clostridia;o__Clostridiales;f__Lachnospiraceae | 1 |
| OTU_523 | k__Bacteria;p__Actinobacteria;c__unidentified_Actinobacteria;o__Micrococcales;f__Rarobacteraceae;g__Rarobacter | 0.93 |
| OTU_522 | k__Bacteria;p__Firmicutes;c__Clostridia;o__Clostridiales;f__Lachnospiraceae;g__Fusicatenibacter;s__ | 1 |
| OTU_521 | k__Bacteria;p__Bacteroidetes;c__Bacteroidia;o__Bacteroidales;f__Muribaculaceae;g__;s__ | 0.98 |
| OTU_520 | k__Bacteria;p__Acidobacteria;c__Acidobacteriia;o__Acidobacteriales;f__unidentified_Acidobacteriales;g__Candidatus_Koribacter;s__ | 0.96 |
| OTU_527 | k__Archaea;p__Thaumarchaeota;c__Nitrososphaeria;o__Nitrososphaerales;f__Nitrososphaeraceae;g__;s__ | 1 |
| OTU_526 | k__Bacteria;p__Actinobacteria;c__unidentified_Actinobacteria;o__Frankiales;f__Acidothermaceae;g__Acidothermus;s__ | 1 |
| OTU_525 | k__Bacteria;p__Planctomycetes;c__Planctomycetacia;o__;f__;g__;s__ | 1 |
| OTU_524 | k__Bacteria;p__Proteobacteria;c__Gammaproteobacteria;o__unidentified_Gammaproteobacteria;f__Nitrosomonadaceae | 1 |
| OTU_529 | k__Bacteria;p__Firmicutes;c__Clostridia;o__Clostridiales;f__unidentified_Clostridiales;g__Fonticella;s__ | 1 |
| OTU_528 | k__Bacteria;p__Proteobacteria;c__Alphaproteobacteria;o__unidentified_Alphaproteobacteria;f__unidentified_Alphaproteobacteria | 0.89 |
| OTU_400 | k__Bacteria;p__Bacteroidetes;c__Bacteroidia;o__Bacteroidales;f__Muribaculaceae;g__;s__ | 1 |
| OTU_1840 | k__Bacteria;p__Proteobacteria;c__Gammaproteobacteria;o__Xanthomonadales;f__Xanthomonadaceae | 1 |
| OTU_742 | k__Bacteria;p__Actinobacteria;c__Acidimicrobiia;o__unidentified_Acidimicrobiia;f__unidentified_Acidimicrobiia;g__Ilumatobacter | 0.81 |
| OTU_2398 | k__Bacteria;p__Melainabacteria;c__;o__;f__;g__;s__ | 1 |
| OTU_191 | k__Bacteria;p__Actinobacteria;c__Acidimicrobiia;o__unidentified_Acidimicrobiia;f__Iamiaceae;g__Iamia;s__ | 1 |
| OTU_2793 | k__Bacteria;p__Bacteroidetes;c__Bacteroidia;o__Bacteroidales;f__unidentified_Bacteroidales;g__unidentified_Bacteroidales;s__rumen_bacterium_YS3 | 0.88 |
| OTU_59 | k__Bacteria;p__Proteobacteria;c__Alphaproteobacteria;o__Rhodobacterales;f__Rhodobacteraceae | 1 |
| OTU_2791 | k__Bacteria;p__Proteobacteria;c__Gammaproteobacteria;o__unidentified_Gammaproteobacteria | 0.95 |
| OTU_2790 | k__Bacteria;p__Bacteroidetes;c__Bacteroidia;o__Chitinophagales;f__Saprospiraceae;g__;s__ | 0.96 |
| OTU_2797 | k__Bacteria;p__Firmicutes;c__Bacilli;o__Lactobacillales;f__Leuconostocaceae;g__Weissella | 1 |
| OTU_2796 | k__Bacteria;p__Bacteroidetes;c__Bacteroidia;o__Bacteroidales;f__Prevotellaceae | 1 |
| OTU_2795 | k__Bacteria;p__Bacteroidetes;c__Bacteroidia;o__Cytophagales;f__Spirosomaceae;g__Persicitalea;s__ | 1 |
| OTU_2794 | k__Bacteria;p__Proteobacteria;c__Gammaproteobacteria;o__unidentified_Gammaproteobacteria;f__Burkholderiaceae | 1 |
| OTU_50 | k__Bacteria;p__Firmicutes;c__Clostridia;o__Clostridiales;f__Lachnospiraceae;g__unidentified_Lachnospiraceae;s__Tyzzerella_sp_Marseille-P3062 | 0.98 |
| OTU_51 | k__Bacteria;p__Proteobacteria;c__Alphaproteobacteria;o__Rickettsiales;f__unidentified_Rickettsiales;g__unidentified_Rickettsiales;s__ | 0.98 |
| OTU_2799 | k__Bacteria;p__Proteobacteria | 0.88 |
| OTU_2798 | k__Bacteria;p__Chloroflexi;c__Chloroflexia;o__Chloroflexales;f__Chloroflexaceae;g__Chloronema;s__ | 0.99 |
| OTU_54 | k__Bacteria;p__Firmicutes;c__Clostridia;o__Clostridiales;f__unidentified_Clostridiales | 1 |
| OTU_55 | k__Bacteria;p__Actinobacteria;c__Acidimicrobiia;o__Actinomarinales;f__Actinomarinaceae;g__Candidatus_Actinomarina;s__ | 1 |
| OTU_56 | k__Bacteria;p__Proteobacteria;c__Gammaproteobacteria;o__Enterobacteriales;f__Enterobacteriaceae | 1 |
| OTU_57 | k__Bacteria;p__Firmicutes;c__Bacilli;o__Lactobacillales;f__Lactobacillaceae;g__Lactobacillus;s__Lactobacillus_gasseri | 1 |
| OTU_1792 | k__Bacteria;p__Firmicutes;c__Clostridia;o__Clostridiales;f__Lachnospiraceae;g__Roseburia;s__Roseburia_sp_499 | 0.99 |
| OTU_1793 | k__Bacteria;p__Proteobacteria;c__Gammaproteobacteria;o__unidentified_Gammaproteobacteria;f__Burkholderiaceae | 1 |
| OTU_1790 | k__Bacteria;p__Bacteroidetes;c__Bacteroidia;o__Bacteroidales;f__Prolixibacteraceae;g__;s__ | 1 |
| OTU_1791 | k__Bacteria;p__Proteobacteria;c__Gammaproteobacteria;o__unidentified_Gammaproteobacteria;f__Rhodocyclaceae | 1 |
| OTU_1796 | k__Bacteria;p__Firmicutes;c__Bacilli;o__Lactobacillales;f__Carnobacteriaceae;g__Marinilactibacillus;s__Marinilactibacillus_psychrotolerans | 1 |
| OTU_1797 | k__Bacteria;p__Bacteroidetes;c__Bacteroidia;o__Bacteroidales;f__Bacteroidaceae;g__Bacteroides;s__Bacteroides_ovatus | 1 |
| OTU_1794 | k__Bacteria;p__Planctomycetes;c__Phycisphaerae;o__Tepidisphaerales;f__;g__;s__ | 0.94 |
| OTU_1795 | k__Bacteria | 0.99 |
| OTU_257 | k__Bacteria;p__Proteobacteria;c__Gammaproteobacteria;o__Pseudomonadales;f__Pseudomonadaceae;g__Pseudomonas;s__Pseudomonas_stutzeri | 0.88 |
| OTU_1798 | k__Bacteria;p__Proteobacteria;c__Alphaproteobacteria;o__Rickettsiales;f__unidentified_Rickettsiales;g__unidentified_Rickettsiales;s__ | 1 |
| OTU_1799 | k__Bacteria;p__Firmicutes;c__Clostridia;o__Clostridiales;f__Lachnospiraceae | 1 |
| OTU_181 | k__Bacteria;p__Proteobacteria;c__Alphaproteobacteria;o__Sphingomonadales;f__Sphingomonadaceae;g__Sphingomonas | 0.99 |
| OTU_180 | k__Bacteria;p__Proteobacteria;c__Gammaproteobacteria;o__Xanthomonadales;f__Xanthomonadaceae;g__Arenimonas;s__ | 1 |
| OTU_183 | k__Bacteria;p__Firmicutes;c__Erysipelotrichia;o__Erysipelotrichales;f__Erysipelotrichaceae;g__Catenisphaera;s__ | 0.96 |
| OTU_182 | k__Bacteria;p__Proteobacteria;c__Alphaproteobacteria;o__Rickettsiales;f__;g__;s__ | 0.99 |
| OTU_185 | k__Bacteria;p__Proteobacteria;c__Deltaproteobacteria;o__Myxococcales;f__Myxococcaceae;g__;s__ | 0.81 |
| OTU_184 | k__Bacteria;p__Bacteroidetes;c__Bacteroidia;o__Bacteroidales;f__Tannerellaceae;g__Parabacteroides | 0.92 |
| OTU_1556 | k__Bacteria;p__Proteobacteria;c__Gammaproteobacteria;o__Alteromonadales;f__Alteromonadaceae;g__Alishewanella;s__ | 1 |
| OTU_638 | k__Bacteria;p__Proteobacteria;c__Alphaproteobacteria;o__unidentified_Alphaproteobacteria;f__unidentified_Alphaproteobacteria | 0.97 |
| OTU_637 | k__Bacteria;p__Firmicutes;c__Bacilli;o__Lactobacillales;f__Streptococcaceae;g__Streptococcus;s__Streptococcus_agalactiae | 1 |
| OTU_636 | k__Bacteria;p__Cyanobacteria;c__unidentified_Cyanobacteria;o__unidentified_Cyanobacteria;f__unidentified_Cyanobacteria;g__unidentified_Cyanobacteria;s__Cyanobacteria/Melainabacteria_group_bacterium_S15B-MN24_CBMW_12 | 1 |
| OTU_635 | k__Bacteria;p__Proteobacteria;c__Alphaproteobacteria;o__Rhizobiales;f__unidentified_Rhizobiales;g__Rhodomicrobium;s__ | 0.94 |
| OTU_634 | k__Bacteria;p__Spirochaetes;c__Spirochaetia;o__Spirochaetales;f__Spirochaetaceae;g__unidentified_Spirochaetaceae;s__Treponema_zuelzerae | 0.99 |
| OTU_633 | k__Bacteria;p__Bacteroidetes;c__Bacteroidia;o__Bacteroidales;f__Muribaculaceae;g__;s__ | 0.99 |
| OTU_632 | k__Bacteria;p__Bacteroidetes;c__Bacteroidia;o__Bacteroidales;f__Muribaculaceae;g__;s__ | 1 |
| OTU_631 | k__Bacteria;p__Proteobacteria;c__Alphaproteobacteria;o__unidentified_Alphaproteobacteria;f__Acetobacteraceae | 1 |
| OTU_630 | k__Bacteria;p__Actinobacteria;c__unidentified_Actinobacteria | 1 |
| OTU_163 | k__Bacteria;p__Bacteroidetes;c__Bacteroidia;o__Bacteroidales;f__Muribaculaceae;g__;s__ | 1 |
| OTU_256 | k__Bacteria;p__Proteobacteria;c__Alphaproteobacteria;o__unidentified_Alphaproteobacteria;f__unidentified_Alphaproteobacteria | 0.96 |
| OTU_95 | k__Bacteria;p__Firmicutes;c__Clostridia;o__Clostridiales;f__unidentified_Clostridiales;g__unidentified_Clostridiales;s__Clostridium_sp_ND2 | 0.99 |
| OTU_96 | k__Bacteria;p__Proteobacteria;c__Gammaproteobacteria;o__Xanthomonadales;f__Rhodanobacteraceae;g__Chujaibacter;s__ | 0.98 |
| OTU_97 | k__Bacteria;p__Proteobacteria;c__Gammaproteobacteria;o__unidentified_Gammaproteobacteria;f__Burkholderiaceae;g__Limnobacter;s__ | 0.99 |
| OTU_747 | k__Bacteria;p__Proteobacteria;c__Deltaproteobacteria;o__Myxococcales;f__Polyangiaceae;g__Pajaroellobacter;s__ | 0.97 |
| OTU_167 | k__Bacteria;p__Proteobacteria;c__Alphaproteobacteria;o__Rhizobiales;f__unidentified_Rhizobiales;g__Devosia;s__ | 0.86 |
| OTU_166 | k__Bacteria;p__Firmicutes;c__Bacilli;o__Lactobacillales;f__Lactobacillaceae;g__Lactobacillus;s__Lactobacillus_agilis | 0.99 |
| OTU_165 | k__Bacteria;p__Proteobacteria;c__Alphaproteobacteria;o__Caulobacterales;f__Caulobacteraceae;g__Brevundimonas;s__Brevundimonas_vesicularis | 0.95 |
| OTU_2979 | k__Bacteria;p__Firmicutes;c__Clostridia;o__Clostridiales;f__Lachnospiraceae;g__Lachnoclostridium;s__ | 0.91 |
| OTU_2978 | k__Bacteria | 0.96 |
| OTU_2977 | k__Bacteria;p__Firmicutes;c__Negativicutes;o__Selenomonadales;f__Veillonellaceae;g__Megamonas | 0.89 |
| OTU_2976 | k__Bacteria;p__Firmicutes;c__Negativicutes;o__Selenomonadales;f__Veillonellaceae;g__Megamonas;s__ | 0.95 |
| OTU_2975 | k__Bacteria;p__Proteobacteria;c__Gammaproteobacteria;o__Enterobacteriales;f__Enterobacteriaceae | 1 |
| OTU_2974 | k__Bacteria;p__Firmicutes;c__Clostridia;o__Clostridiales;f__Ruminococcaceae;g__;s__ | 0.88 |
| OTU_2973 | k__Bacteria;p__Bacteroidetes;c__Bacteroidia;o__Flavobacteriales;f__Flavobacteriaceae | 1 |
| OTU_2972 | k__Bacteria | 0.89 |
| OTU_2971 | k__Bacteria;p__Firmicutes;c__Clostridia;o__Clostridiales | 0.92 |
| OTU_2970 | k__Bacteria;p__Chloroflexi;c__Anaerolineae;o__Ardenticatenales;f__;g__;s__ | 1 |
| OTU_989 | k__Bacteria;p__Thermotogae;c__unidentified_Thermotogae;o__Petrotogales;f__unidentified_Petrotogales;g__Defluviitoga;s__ | 1 |
| OTU_988 | k__Bacteria;p__Proteobacteria;c__Gammaproteobacteria;o__Xanthomonadales;f__Xanthomonadaceae;g__Silanimonas;s__ | 1 |
| OTU_459 | k__Bacteria;p__Proteobacteria;c__Gammaproteobacteria;o__unidentified_Gammaproteobacteria;f__unidentified_Gammaproteobacteria;g__Acidibacter;s__ | 1 |
| OTU_458 | k__Bacteria;p__Proteobacteria;c__Alphaproteobacteria;o__unidentified_Alphaproteobacteria;f__Acetobacteraceae | 1 |
| OTU_453 | k__Bacteria;p__Proteobacteria;c__Gammaproteobacteria;o__Enterobacteriales;f__Enterobacteriaceae | 1 |
| OTU_452 | k__Bacteria;p__Firmicutes;c__Erysipelotrichia;o__Erysipelotrichales;f__Erysipelotrichaceae;g__unidentified_Erysipelotrichaceae;s__bacterium_LF-3 | 0.95 |
| OTU_983 | k__Bacteria;p__Acidobacteria;c__unidentified_Acidobacteria;o__unidentified_Acidobacteria;f__unidentified_Acidobacteria;g__unidentified_Acidobacteria;s__Acidobacteria_bacterium_LP6 | 0.94 |
| OTU_982 | k__Bacteria;p__Firmicutes;c__Bacilli;o__Bacillales;f__Bacillaceae;g__Virgibacillus | 0.83 |
| OTU_985 | k__Bacteria;p__Bacteroidetes;c__Bacteroidia;o__Chitinophagales;f__Chitinophagaceae;g__Flavisolibacter;s__ | 1 |
| OTU_456 | k__Bacteria;p__Proteobacteria;c__Alphaproteobacteria;o__Sphingomonadales;f__Sphingomonadaceae;g__Novosphingobium | 0.98 |
| OTU_455 | k__Bacteria;p__Proteobacteria;c__Alphaproteobacteria;o__Rhizobiales;f__Xanthobacteraceae | 0.99 |
| OTU_454 | k__Bacteria;p__Proteobacteria;c__Gammaproteobacteria;o__unidentified_Gammaproteobacteria;f__Burkholderiaceae;g__Eoetvoesia;s__ | 1 |
| OTU_1412 | k__Bacteria;p__Firmicutes;c__Bacilli;o__Lactobacillales;f__Lactobacillaceae;g__Lactobacillus | 1 |
| OTU_991 | k__Bacteria;p__Firmicutes;c__Clostridia;o__Clostridiales | 0.94 |
| OTU_1178 | k__Bacteria;p__Actinobacteria;c__Acidimicrobiia;o__;f__;g__;s__ | 0.96 |
| OTU_1179 | k__Bacteria;p__Chloroflexi;c__Ktedonobacteria;o__Ktedonobacterales;f__;g__;s__ | 0.97 |
| OTU_1172 | k__Bacteria;p__Firmicutes;c__Clostridia;o__Clostridiales;f__unidentified_Clostridiales;g__Anaerovorax;s__ | 0.81 |
| OTU_1173 | k__Bacteria;p__Acidobacteria;c__unidentified_Acidobacteria;o__unidentified_Acidobacteria;f__unidentified_Acidobacteria;g__unidentified_Acidobacteria;s__Acidobacteria_bacterium_RBG_16_70_10 | 0.98 |
| OTU_1170 | k__Bacteria;p__Verrucomicrobia;c__Verrucomicrobiae;o__Verrucomicrobiales;f__Rubritaleaceae;g__Luteolibacter;s__ | 1 |
| OTU_1171 | k__Bacteria;p__Actinobacteria;c__Thermoleophilia;o__Solirubrobacterales;f__Solirubrobacteraceae | 1 |
| OTU_1176 | k__Bacteria;p__Proteobacteria;c__Alphaproteobacteria;o__unidentified_Alphaproteobacteria;f__Acetobacteraceae;g__Craurococcus;s__ | 0.98 |
| OTU_1177 | k__Bacteria;p__Bacteroidetes;c__Bacteroidia;o__Bacteroidales;f__Tannerellaceae;g__Parabacteroides;s__Parabacteroides_goldsteinii | 0.91 |
| OTU_1174 | k__Bacteria;p__Proteobacteria;c__Deltaproteobacteria;o__Desulfuromonadales;f__Desulfuromonadaceae | 0.96 |
| OTU_1175 | k__Bacteria;p__Firmicutes;c__Clostridia;o__Clostridiales;f__Lachnospiraceae;g__;s__ | 0.82 |
| OTU_857 | k__Bacteria;p__Firmicutes;c__Clostridia;o__Clostridiales;f__Ruminococcaceae;g__Butyricicoccus | 0.97 |
| OTU_856 | k__Bacteria;p__Firmicutes;c__Clostridia;o__Clostridiales;f__Ruminococcaceae | 0.93 |
| OTU_855 | k__Bacteria;p__Chlamydiae;c__unidentified_Chlamydiae;o__Chlamydiales;f__;g__;s__ | 0.99 |
| OTU_854 | k__Bacteria;p__Proteobacteria;c__Alphaproteobacteria;o__Sphingomonadales;f__Sphingomonadaceae;g__Sphingomonas | 0.95 |
| OTU_853 | k__Bacteria;p__Bacteroidetes;c__Bacteroidia;o__Flavobacteriales;f__Flavobacteriaceae;g__Flavobacterium | 1 |
| OTU_852 | k__Bacteria;p__Chloroflexi;c__Anaerolineae | 0.98 |
| OTU_851 | k__Bacteria;p__Actinobacteria;c__;o__;f__;g__;s__ | 0.99 |
| OTU_850 | k__Bacteria;p__Cyanobacteria;c__unidentified_Cyanobacteria;o__unidentified_Cyanobacteria;f__unidentified_Cyanobacteria;g__unidentified_Cyanobacteria;s__Phalacroma_mitra | 1 |
| OTU_1770 | k__Bacteria;p__Proteobacteria;c__Alphaproteobacteria;o__Rickettsiales;f__unidentified_Rickettsiales;g__unidentified_Rickettsiales;s__ | 1 |
| OTU_1771 | k__Bacteria;p__Proteobacteria;c__Deltaproteobacteria;o__;f__;g__;s__ | 0.91 |
| OTU_1772 | k__Bacteria;p__;c__;o__;f__;g__;s__ | 0.88 |
| OTU_465 | k__Bacteria;p__Firmicutes;c__Clostridia;o__Clostridiales;f__Lachnospiraceae;g__unidentified_Lachnospiraceae;s__Lachnospiraceae_bacterium_M18-1 | 0.84 |
| OTU_1774 | k__Bacteria;p__Proteobacteria;c__Gammaproteobacteria;o__Cellvibrionales;f__Cellvibrionaceae;g__Cellvibrio | 0.85 |
| OTU_1775 | k__Bacteria;p__Bacteroidetes;c__Bacteroidia;o__Flavobacteriales;f__Flavobacteriaceae;g__Salegentibacter;s__Salegentibacter_sp | 0.85 |
| OTU_859 | k__Bacteria;p__Proteobacteria;c__Alphaproteobacteria;o__Rhizobiales;f__Hyphomicrobiaceae;g__Pedomicrobium;s__ | 0.83 |
| OTU_858 | k__Bacteria;p__Firmicutes;c__Bacilli;o__Lactobacillales;f__Lactobacillaceae;g__Lactobacillus;s__Lactobacillus_mucosae | 0.98 |
| OTU_1419 | k__Bacteria;p__Firmicutes;c__Clostridia;o__Clostridiales;f__Ruminococcaceae;g__Faecalibacterium;s__ | 0.94 |
| OTU_468 | k__Bacteria;p__Actinobacteria;c__Acidimicrobiia;o__unidentified_Acidimicrobiia;f__unidentified_Acidimicrobiia;g__unidentified_Acidimicrobiia;s__actinobacterium_BGR_88 | 0.93 |
| OTU_121 | k__Bacteria;p__Actinobacteria;c__unidentified_Actinobacteria;o__Micrococcales;f__Microbacteriaceae;g__Aurantimicrobium;s__ | 1 |
| OTU_469 | k__Bacteria;p__Proteobacteria;c__Gammaproteobacteria;o__Pasteurellales;f__Pasteurellaceae;g__Aggregatibacter;s__Aggregatibacter_aphrophilus | 0.8 |
| OTU_356 | k__Bacteria;p__Bacteroidetes;c__Bacteroidia;o__Flavobacteriales;f__unidentified_Flavobacteriales;g__Chryseobacterium | 1 |
| OTU_1015 | k__Bacteria;p__Bacteroidetes;c__Bacteroidia;o__Chitinophagales;f__Chitinophagaceae;g__Terrimonas;s__ | 1 |
| OTU_1929 | k__Bacteria;p__Bacteroidetes;c__Bacteroidia;o__Flavobacteriales;f__Flavobacteriaceae;g__Formosa;s__ | 0.83 |
| OTU_1017 | k__Bacteria;p__Proteobacteria;c__Alphaproteobacteria;o__Rhizobiales;f__unidentified_Rhizobiales;g__Devosia | 1 |
| OTU_1016 | k__Bacteria;p__Firmicutes;c__Clostridia;o__Clostridiales | 0.99 |
| OTU_1011 | k__Bacteria;p__Verrucomicrobia;c__Verrucomicrobiae | 1 |
| OTU_1010 | k__Bacteria;p__Bacteroidetes;c__Bacteroidia;o__Chitinophagales;f__Chitinophagaceae | 1 |
| OTU_1013 | k__Bacteria;p__Cyanobacteria;c__unidentified_Cyanobacteria;o__Synechococcales;f__;g__;s__ | 0.95 |
| OTU_1012 | k__Bacteria;p__Acidobacteria;c__Acidobacteriia;o__Solibacterales;f__unidentified_Solibacterales;g__Candidatus_Solibacter;s__ | 0.81 |
| OTU_1019 | k__Bacteria;p__Proteobacteria;c__Alphaproteobacteria;o__Rickettsiales | 1 |
| OTU_1018 | k__Bacteria;p__Gemmatimonadetes;c__unidentified_Gemmatimonadetes;o__Gemmatimonadales;f__Gemmatimonadaceae | 1 |
| OTU_1283 | k__Bacteria;p__Firmicutes;c__Clostridia;o__Clostridiales;f__Ruminococcaceae;g__unidentified_Ruminococcaceae;s__rumen_bacterium_NK4A214 | 1 |
| OTU_357 | k__Bacteria;p__Proteobacteria;c__Gammaproteobacteria;o__Aeromonadales;f__Succinivibrionaceae;g__Succinivibrio;s__ | 0.9 |
| OTU_350 | k__Bacteria;p__Proteobacteria;c__Gammaproteobacteria;o__unidentified_Gammaproteobacteria;f__Thioalkalispiraceae;g__Thioalkalispira;s__ | 0.97 |
| OTU_748 | k__Bacteria;p__Bacteroidetes;c__Bacteroidia;o__Bacteroidales;f__Muribaculaceae;g__;s__ | 1 |
| OTU_1309 | k__Bacteria | 1 |
| OTU_1308 | k__Bacteria;p__Bacteroidetes;c__Bacteroidia;o__Bacteroidales;f__Rikenellaceae;g__;s__ | 0.96 |
| OTU_1301 | k__Bacteria;p__Actinobacteria;c__unidentified_Actinobacteria;o__Pseudonocardiales;f__Pseudonocardiaceae;g__Actinomycetospora;s__ | 1 |
| OTU_1300 | k__Bacteria;p__Actinobacteria;c__Thermoleophilia;o__Solirubrobacterales;f__Solirubrobacteraceae | 0.86 |
| OTU_1303 | k__Bacteria;p__Proteobacteria;c__Deltaproteobacteria;o__Myxococcales;f__Vulgatibacteraceae;g__Vulgatibacter;s__Vulgatibacter_incomptus | 1 |
| OTU_1302 | k__Bacteria;p__Bacteroidetes;c__Bacteroidia;o__Chitinophagales;f__Chitinophagaceae;g__;s__ | 0.91 |
| OTU_1305 | k__Bacteria;p__Actinobacteria;c__Coriobacteriia;o__Coriobacteriales;f__Atopobiaceae;g__Atopobium | 1 |
| OTU_1304 | k__Bacteria;p__Proteobacteria;c__Gammaproteobacteria;o__unidentified_Gammaproteobacteria;f__Burkholderiaceae;g__Sutterella;s__ | 1 |
| OTU_1307 | k__Bacteria;p__Proteobacteria;c__Alphaproteobacteria;o__Rhizobiales;f__unidentified_Rhizobiales;g__Bauldia;s__ | 0.95 |
| OTU_1306 | k__Bacteria;p__Deinococcus-Thermus;c__Deinococci;o__Deinococcales;f__Trueperaceae;g__Truepera;s__ | 1 |
| OTU_351 | k__Bacteria;p__Actinobacteria;c__unidentified_Actinobacteria;o__Frankiales;f__Acidothermaceae;g__Acidothermus | 0.94 |
| OTU_2482 | k__Bacteria;p__Proteobacteria;c__Alphaproteobacteria;o__Rhodobacterales;f__Rhodobacteraceae | 0.98 |
| OTU_187 | k__Bacteria;p__Proteobacteria;c__Alphaproteobacteria;o__Rhizobiales;f__unidentified_Rhizobiales | 0.88 |
| OTU_1594 | k__Bacteria;p__Firmicutes;c__Clostridia;o__Clostridiales;f__Lachnospiraceae;g__Syntrophococcus | 0.87 |
| OTU_1418 | k__Bacteria;p__Bacteroidetes;c__Bacteroidia;o__Bacteroidales;f__;g__;s__ | 0.89 |
| OTU_186 | k__Bacteria;p__Firmicutes;c__Clostridia;o__Clostridiales;f__Lachnospiraceae;g__Anaerostipes;s__Anaerostipes_hadrus | 1 |
| OTU_1949 | k__Bacteria;p__Proteobacteria;c__Alphaproteobacteria;o__unidentified_Alphaproteobacteria | 0.99 |
| OTU_1948 | k__Bacteria;p__Gemmatimonadetes;c__;o__;f__;g__;s__ | 0.82 |
| OTU_1947 | k__Bacteria;p__Bacteroidetes;c__Bacteroidia;o__Sphingobacteriales | 1 |
| OTU_1946 | k__Bacteria;p__Bacteroidetes;c__Bacteroidia;o__Bacteroidales | 0.95 |
| OTU_1945 | k__Bacteria;p__Proteobacteria;c__Deltaproteobacteria;o__Myxococcales | 1 |
| OTU_1944 | k__Bacteria;p__Bacteroidetes;c__Bacteroidia;o__Bacteroidales;f__Prevotellaceae;g__Alloprevotella;s__Alloprevotella_tannerae | 1 |
| OTU_1943 | k__Bacteria;p__Proteobacteria;c__Alphaproteobacteria | 0.99 |
| OTU_1942 | k__Bacteria;p__Bacteroidetes;c__Bacteroidia;o__Cytophagales;f__Microscillaceae;g__;s__ | 0.99 |
| OTU_1941 | k__Bacteria | 0.98 |
| OTU_1940 | k__Bacteria;p__Proteobacteria;c__Alphaproteobacteria;o__Sphingomonadales;f__Sphingomonadaceae;g__Novosphingobium | 0.98 |
| OTU_189 | k__Bacteria;p__Actinobacteria;c__unidentified_Actinobacteria;o__Frankiales;f__Acidothermaceae;g__Acidothermus;s__ | 0.97 |
| OTU_2098 | k__Bacteria;p__Bacteroidetes;c__Bacteroidia;o__Bacteroidales | 1 |
| OTU_2099 | k__Bacteria;p__Firmicutes;c__Clostridia;o__Clostridiales;f__Lachnospiraceae | 0.99 |
| OTU_2094 | k__Bacteria;p__Proteobacteria;c__Alphaproteobacteria;o__unidentified_Alphaproteobacteria;f__unidentified_Alphaproteobacteria;g__Dongia | 1 |
| OTU_2095 | k__Bacteria;p__Proteobacteria;c__Gammaproteobacteria;o__Orbales;f__Orbaceae;g__Gilliamella | 1 |
| OTU_2096 | k__Bacteria;p__Bacteroidetes;c__Bacteroidia;o__Chitinophagales;f__Chitinophagaceae;g__Flavihumibacter;s__ | 1 |
| OTU_2097 | k__Bacteria;p__Proteobacteria;c__Gammaproteobacteria;o__unidentified_Gammaproteobacteria;f__unidentified_Gammaproteobacteria;g__unidentified_Gammaproteobacteria;s__beta_proteobacterium_WF17 | 0.93 |
| OTU_2090 | k__Bacteria;p__Proteobacteria;c__Alphaproteobacteria;o__Rickettsiales;f__unidentified_Rickettsiales;g__unidentified_Rickettsiales;s__ | 0.99 |
| OTU_2091 | k__Bacteria;p__Bacteroidetes;c__Bacteroidia;o__Cytophagales;f__Cytophagaceae;g__Cytophaga;s__ | 1 |
| OTU_2092 | k__Bacteria;p__Firmicutes;c__Clostridia;o__Clostridiales;f__Ruminococcaceae | 0.87 |
| OTU_2093 | k__Bacteria;p__Firmicutes;c__Clostridia;o__Clostridiales;f__Ruminococcaceae | 0.95 |
| OTU_2308 | k__Bacteria;p__Chloroflexi;c__;o__;f__;g__;s__ | 0.98 |
| OTU_2309 | k__Bacteria;p__Firmicutes;c__Clostridia;o__Clostridiales | 0.83 |
| OTU_2304 | k__Bacteria;p__Planctomycetes;c__Phycisphaerae;o__Phycisphaerales;f__Phycisphaeraceae;g__;s__ | 0.99 |
| OTU_2305 | k__Bacteria;p__Bacteroidetes;c__Bacteroidia;o__Bacteroidales;f__Muribaculaceae;g__;s__ | 1 |
| OTU_2306 | k__Bacteria;p__Firmicutes;c__Clostridia;o__Clostridiales;f__Lachnospiraceae;g__unidentified_Lachnospiraceae;s__Clostridium_sp_Culture-41 | 0.89 |
| OTU_2307 | k__Bacteria;p__Firmicutes;c__Clostridia;o__Clostridiales;f__Lachnospiraceae | 1 |
| OTU_2300 | k__Bacteria | 1 |
| OTU_2301 | k__Bacteria;p__Proteobacteria;c__Deltaproteobacteria;o__Myxococcales;f__Phaselicystidaceae;g__Phaselicystis;s__ | 1 |
| OTU_2302 | k__Bacteria;p__Planctomycetes;c__unidentified_Planctomycetes;o__Brocadiales;f__Brocadiaceae;g__Candidatus_Brocadia;s__ | 1 |
| OTU_2303 | k__Bacteria | 1 |
| OTU_2524 | k__Bacteria;p__Actinobacteria;c__unidentified_Actinobacteria;o__Propionibacteriales;f__Nocardioidaceae;g__Nocardioides | 0.99 |
| OTU_2525 | k__Bacteria;p__Proteobacteria;c__Gammaproteobacteria;o__Alteromonadales;f__Psychromonadaceae;g__Psychromonas | 0.99 |
| OTU_2526 | k__Bacteria;p__Bacteroidetes;c__Bacteroidia;o__Bacteroidales;f__Prevotellaceae;g__unidentified_Prevotellaceae;s__Alloprevotella_sp_feline_oral_taxon_309 | 1 |
| OTU_2527 | k__Bacteria;p__Firmicutes;c__Clostridia;o__Clostridiales;f__Lachnospiraceae | 1 |
| OTU_2520 | k__Bacteria;p__Proteobacteria;c__Gammaproteobacteria;o__Enterobacteriales;f__Enterobacteriaceae | 0.99 |
| OTU_2521 | k__Bacteria;p__Proteobacteria | 0.8 |
| OTU_2522 | k__Bacteria;p__Firmicutes;c__Clostridia;o__Clostridiales;f__Lachnospiraceae | 1 |
| OTU_2523 | k__Bacteria;p__Bacteroidetes;c__Bacteroidia;o__Chitinophagales;f__Saprospiraceae;g__Lewinella;s__Cladosiphon_okamuranus | 0.94 |
| OTU_2528 | k__Bacteria;p__Firmicutes;c__Clostridia;o__Clostridiales;f__unidentified_Clostridiales | 0.93 |
| OTU_2529 | k__Bacteria;p__Cyanobacteria;c__unidentified_Cyanobacteria;o__Synechococcales | 1 |
| OTU_2132 | k__Bacteria;p__Fusobacteria;c__Fusobacteriia;o__Fusobacteriales;f__Leptotrichiaceae;g__Leptotrichia;s__Leptotrichia_shahii | 0.86 |
| OTU_2410 | k__Bacteria;p__Proteobacteria;c__Gammaproteobacteria;o__Alteromonadales;f__Alteromonadaceae;g__Rheinheimera | 0.99 |
| OTU_2411 | k__Bacteria;p__Proteobacteria;c__Gammaproteobacteria | 1 |
| OTU_2412 | k__Bacteria;p__Actinobacteria;c__Thermoleophilia;o__Solirubrobacterales;f__Solirubrobacteraceae;g__Conexibacter;s__ | 0.96 |
| OTU_2413 | k__Bacteria | 1 |
| OTU_2414 | k__Bacteria;p__Firmicutes;c__Clostridia;o__Clostridiales;f__Lachnospiraceae | 1 |
| OTU_2415 | k__Bacteria;p__Proteobacteria;c__Gammaproteobacteria;o__unidentified_Gammaproteobacteria;f__Burkholderiaceae | 1 |
| OTU_2416 | k__Bacteria;p__Acidobacteria;c__Acidobacteriia;o__;f__;g__;s__ | 1 |
| OTU_2417 | k__Bacteria;p__Firmicutes;c__Bacilli;o__Bacillales;f__Planococcaceae;g__Sporosarcina;s__Sporosarcina_thermotolerans | 0.81 |
| OTU_2418 | k__Bacteria;p__Planctomycetes;c__Planctomycetacia;o__unidentified_Planctomycetacia;f__Gemmataceae;g__Fimbriiglobus;s__ | 0.9 |
| OTU_2419 | k__Bacteria;p__Chloroflexi;c__;o__;f__;g__;s__ | 0.88 |
| OTU_530 | k__Bacteria;p__Bacteroidetes;c__Bacteroidia;o__Bacteroidales;f__Muribaculaceae;g__;s__ | 1 |
| OTU_531 | k__Bacteria;p__Bacteroidetes;c__Bacteroidia;o__Bacteroidales;f__Prevotellaceae;g__unidentified_Prevotellaceae;s__Prevotella_melaninogenica | 0.99 |
| OTU_532 | k__Archaea;p__Euryarchaeota;c__Methanobacteria;o__Methanobacteriales;f__Methanobacteriaceae;g__Methanobacterium | 1 |
| OTU_533 | k__Bacteria;p__Proteobacteria;c__Deltaproteobacteria;o__Myxococcales;f__unidentified_Myxococcales;g__unidentified_Myxococcales;s__Anaeromyxobacter_dehalogenans | 0.89 |
| OTU_534 | k__Bacteria;p__Chloroflexi;c__Anaerolineae | 0.92 |
| OTU_535 | k__Bacteria;p__Verrucomicrobia;c__Verrucomicrobiae;o__Verrucomicrobiales;f__Verrucomicrobiaceae;g__;s__ | 1 |
| OTU_536 | k__Bacteria;p__Actinobacteria;c__Acidimicrobiia;o__;f__;g__;s__ | 0.97 |
| OTU_537 | k__Bacteria;p__Firmicutes;c__Bacilli;o__Lactobacillales;f__Streptococcaceae;g__Streptococcus | 1 |
| OTU_538 | k__Bacteria;p__Proteobacteria;c__Alphaproteobacteria;o__Rhizobiales;f__unidentified_Rhizobiales;g__Anderseniella;s__ | 0.99 |
| OTU_539 | k__Bacteria;p__Actinobacteria;c__Thermoleophilia;o__Gaiellales;f__Gaiellaceae;g__Gaiella;s__ | 1 |
| OTU_2632 | k__Bacteria;p__Planctomycetes;c__Phycisphaerae;o__Tepidisphaerales;f__;g__;s__ | 1 |
| OTU_2633 | k__Bacteria;p__Actinobacteria;c__Thermoleophilia;o__Solirubrobacterales | 1 |
| OTU_2634 | k__Bacteria;p__Firmicutes;c__Clostridia;o__Clostridiales | 0.86 |
| OTU_2635 | k__Bacteria;p__Chloroflexi;c__Chloroflexia;o__Thermomicrobiales;f__;g__;s__ | 0.95 |
| OTU_2636 | k__Bacteria;p__Bacteroidetes;c__Bacteroidia;o__Bacteroidales;f__Muribaculaceae | 0.81 |
| OTU_2637 | k__Bacteria;p__Proteobacteria;c__Alphaproteobacteria;o__Rhizobiales | 0.98 |
| OTU_1245 | k__Bacteria;p__Proteobacteria;c__Alphaproteobacteria;o__unidentified_Alphaproteobacteria;f__Acetobacteraceae;g__Acidiphilium;s__ | 0.96 |
| OTU_414 | k__Bacteria;p__Proteobacteria;c__Deltaproteobacteria;o__unidentified_Deltaproteobacteria;f__unidentified_Deltaproteobacteria;g__unidentified_Deltaproteobacteria | 0.8 |
| OTU_47 | k__Bacteria;p__Firmicutes;c__Clostridia;o__Clostridiales;f__Lachnospiraceae;g__Blautia | 0.98 |
| OTU_46 | k__Bacteria;p__Firmicutes;c__Erysipelotrichia;o__Erysipelotrichales;f__Erysipelotrichaceae;g__Erysipelatoclostridium;s__Erysipelatoclostridium_ramosum | 1 |
| OTU_45 | k__Bacteria;p__Proteobacteria;c__Deltaproteobacteria;o__Desulfovibrionales;f__Desulfovibrionaceae;g__Bilophila | 1 |
| OTU_44 | k__Bacteria;p__Firmicutes;c__Clostridia;o__Clostridiales;f__Peptostreptococcaceae;g__Paeniclostridium;s__ | 1 |
| OTU_43 | k__Bacteria;p__Bacteroidetes;c__Bacteroidia;o__Chitinophagales;f__Chitinophagaceae;g__Sediminibacterium;s__ | 1 |
| OTU_42 | k__Bacteria;p__Proteobacteria;c__Gammaproteobacteria;o__Pseudomonadales;f__Pseudomonadaceae;g__Pseudomonas;s__Pseudomonas_frederiksbergensis | 0.88 |
| OTU_41 | k__Bacteria;p__Verrucomicrobia;c__Verrucomicrobiae;o__Verrucomicrobiales;f__Akkermansiaceae;g__Akkermansia;s__ | 1 |
| OTU_40 | k__Bacteria;p__Proteobacteria;c__Gammaproteobacteria;o__unidentified_Gammaproteobacteria;f__Burkholderiaceae;g__Comamonas | 0.94 |
| OTU_49 | k__Bacteria;p__Proteobacteria;c__Gammaproteobacteria;o__Pseudomonadales;f__Moraxellaceae;g__Acinetobacter;s__Acinetobacter_johnsonii | 0.85 |
| OTU_48 | k__Bacteria;p__Actinobacteria;c__unidentified_Actinobacteria;o__Micrococcales;f__Micrococcaceae | 1 |
| OTU_1243 | k__Bacteria | 1 |
| OTU_413 | k__Bacteria;p__Bacteroidetes;c__Bacteroidia;o__Flavobacteriales;f__Flavobacteriaceae;g__Gramella;s__ | 0.93 |
| OTU_1785 | k__Bacteria;p__Proteobacteria;c__Alphaproteobacteria;o__Rhizobiales | 0.81 |
| OTU_1784 | k__Bacteria;p__Bacteroidetes;c__Bacteroidia;o__Flavobacteriales;f__Flavobacteriaceae;g__Maritimimonas;s__Maritimimonas_rapanae | 0.81 |
| OTU_1787 | k__Bacteria;p__Cyanobacteria;c__unidentified_Cyanobacteria;o__unidentified_Cyanobacteria;f__unidentified_Cyanobacteria;g__unidentified_Cyanobacteria | 1 |
| OTU_1786 | k__Bacteria;p__Bacteroidetes;c__Bacteroidia;o__Sphingobacteriales;f__;g__;s__ | 0.88 |
| OTU_1781 | k__Bacteria;p__Proteobacteria;c__Gammaproteobacteria;o__Alteromonadales;f__Alteromonadaceae;g__Aestuariibacter;s__ | 0.86 |
| OTU_1780 | k__Bacteria;p__Bacteroidetes;c__Bacteroidia;o__Sphingobacteriales;f__Sphingobacteriaceae;g__Arcticibacter | 1 |
| OTU_1783 | k__Bacteria;p__Cloacimonetes;c__unidentified_Cloacimonetes;o__unidentified_Cloacimonetes;f__unidentified_Cloacimonetes;g__Candidatus_Cloacimonas;s__ | 1 |
| OTU_1782 | k__Bacteria;p__Bacteroidetes;c__Bacteroidia;o__Bacteroidales;f__Bacteroidaceae;g__Bacteroides;s__Bacteroides_plebeius | 1 |
| OTU_1789 | k__Bacteria;p__Firmicutes;c__Negativicutes;o__Selenomonadales;f__Veillonellaceae;g__Allisonella;s__ | 1 |
| OTU_1788 | k__Bacteria;p__Verrucomicrobia;c__Verrucomicrobiae;o__Verrucomicrobiales;f__Verrucomicrobiaceae;g__Prosthecobacter;s__ | 0.99 |
| OTU_1543 | k__Bacteria;p__Verrucomicrobia;c__Verrucomicrobiae;o__Verrucomicrobiales;f__Verrucomicrobiaceae;g__Prosthecobacter;s__ | 1 |
| OTU_1542 | k__Bacteria;p__Proteobacteria;c__Alphaproteobacteria;o__Rhodobacterales;f__Rhodobacteraceae | 0.94 |
| OTU_1541 | k__Bacteria;p__Planctomycetes;c__Phycisphaerae;o__Phycisphaerales;f__Phycisphaeraceae;g__;s__ | 0.9 |
| OTU_1540 | k__Bacteria;p__Actinobacteria;c__unidentified_Actinobacteria;o__Frankiales | 0.8 |
| OTU_1547 | k__Bacteria;p__Tenericutes;c__Mollicutes;o__Anaeroplasmatales;f__Anaeroplasmataceae;g__Anaeroplasma;s__ | 1 |
| OTU_1546 | k__Bacteria;p__Verrucomicrobia;c__Verrucomicrobiae | 1 |
| OTU_1545 | k__Bacteria;p__Proteobacteria;c__Gammaproteobacteria;o__unidentified_Gammaproteobacteria;f__Hydrogenophilaceae;g__;s__ | 0.95 |
| OTU_1544 | k__Bacteria;p__Proteobacteria;c__Gammaproteobacteria;o__unidentified_Gammaproteobacteria | 0.98 |
| OTU_196 | k__Bacteria;p__Bacteroidetes;c__Bacteroidia;o__Flavobacteriales;f__Flavobacteriaceae;g__Tenacibaculum;s__Tenacibaculum_mesophilum | 0.97 |
| OTU_625 | k__Bacteria;p__Firmicutes;c__Clostridia;o__Clostridiales;f__Ruminococcaceae;g__Ruminiclostridium;s__iron-reducing_bacterium_enrichment_culture_clone_HN-HFO106 | 0.91 |
| OTU_1549 | k__Bacteria;p__Firmicutes;c__Clostridia;o__Clostridiales | 0.83 |
| OTU_1548 | k__Bacteria;p__Bacteroidetes;c__Bacteroidia;o__Flavobacteriales;f__Flavobacteriaceae;g__Ulvibacter;s__ | 0.97 |
| OTU_192 | k__Bacteria;p__Firmicutes;c__Bacilli;o__Bacillales;f__Sporolactobacillaceae;g__;s__ | 1 |
| OTU_193 | k__Bacteria;p__Proteobacteria;c__Gammaproteobacteria;o__Xanthomonadales;f__Xanthomonadaceae;g__Arenimonas;s__ | 0.86 |
| OTU_622 | k__Bacteria;p__Bacteroidetes;c__Bacteroidia;o__Bacteroidales;f__Muribaculaceae;g__;s__ | 0.98 |
| OTU_623 | k__Bacteria;p__Bacteroidetes;c__Bacteroidia;o__Flavobacteriales;f__Flavobacteriaceae;g__Aquibacter;s__ | 0.99 |
| OTU_2136 | k__Bacteria;p__Firmicutes;c__Negativicutes;o__Selenomonadales;f__Veillonellaceae;g__Megasphaera;s__ | 0.8 |
| OTU_2932 | k__Bacteria;p__Proteobacteria;c__Gammaproteobacteria;o__Cellvibrionales;f__Porticoccaceae | 0.99 |
| OTU_947 | k__Bacteria;p__Cyanobacteria;c__unidentified_Cyanobacteria | 0.97 |
| OTU_2930 | k__Bacteria;p__Bacteroidetes;c__Bacteroidia;o__Sphingobacteriales;f__Sphingobacteriaceae | 1 |
| OTU_411 | k__Bacteria;p__Bacteroidetes;c__Rhodothermia;o__Rhodothermales;f__Rhodothermaceae;g__Salinibacter | 1 |
| OTU_2937 | k__Bacteria;p__Planctomycetes;c__Planctomycetacia;o__unidentified_Planctomycetacia;f__unidentified_Planctomycetacia;g__Pirellula;s__ | 0.96 |
| OTU_2936 | k__Bacteria;p__Tenericutes;c__Mollicutes;o__;f__;g__;s__ | 0.98 |
| OTU_996 | k__Bacteria;p__Actinobacteria;c__unidentified_Actinobacteria;o__Pseudonocardiales;f__Pseudonocardiaceae | 1 |
| OTU_2943 | k__Bacteria;p__Acidobacteria | 0.99 |
| OTU_2940 | k__Bacteria;p__Cyanobacteria;c__unidentified_Cyanobacteria;o__unidentified_Cyanobacteria;f__unidentified_Cyanobacteria;g__unidentified_Cyanobacteria | 1 |
| OTU_2941 | k__Bacteria;p__Proteobacteria;c__Alphaproteobacteria | 1 |
| OTU_2946 | k__Bacteria;p__Proteobacteria;c__Alphaproteobacteria;o__Rickettsiales;f__unidentified_Rickettsiales;g__unidentified_Rickettsiales;s__ | 0.83 |
| OTU_993 | k__Bacteria | 1 |
| OTU_2944 | k__Bacteria;p__Candidatus_Shapirobacteria;c__;o__;f__;g__;s__ | 1 |
| OTU_2945 | k__Bacteria;p__Bacteroidetes;c__Bacteroidia;o__Sphingobacteriales;f__Sphingobacteriaceae;g__Sphingobacterium;s__Sphingobacterium_thermophilum | 0.9 |
| OTU_2948 | k__Bacteria;p__Proteobacteria;c__Alphaproteobacteria;o__Rickettsiales;f__unidentified_Rickettsiales;g__unidentified_Rickettsiales;s__ | 1 |
| OTU_2949 | k__Bacteria;p__Proteobacteria;c__Gammaproteobacteria;o__Legionellales;f__Legionellaceae;g__Legionella | 1 |
| OTU_998 | k__Bacteria;p__Firmicutes;c__Bacilli;o__Bacillales;f__Planococcaceae | 1 |
| OTU_999 | k__Bacteria;p__Acidobacteria;c__Acidobacteriia;o__Acidobacteriales;f__unidentified_Acidobacteriales;g__Acidipila;s__ | 0.93 |
| OTU_448 | k__Bacteria | 1 |
| OTU_449 | k__Bacteria;p__Actinobacteria;c__unidentified_Actinobacteria;o__Frankiales;f__Acidothermaceae;g__Acidothermus;s__ | 1 |
| OTU_440 | k__Bacteria;p__Cyanobacteria;c__unidentified_Cyanobacteria;o__unidentified_Cyanobacteria;f__unidentified_Cyanobacteria;g__unidentified_Cyanobacteria | 1 |
| OTU_441 | k__Bacteria;p__Proteobacteria;c__Deltaproteobacteria;o__Myxococcales;f__Haliangiaceae;g__Haliangium;s__Kofleria_flava | 0.89 |
| OTU_442 | k__Bacteria;p__Bacteroidetes;c__Bacteroidia;o__Chitinophagales;f__Saprospiraceae | 1 |
| OTU_443 | k__Bacteria;p__Bacteroidetes;c__Bacteroidia;o__Chitinophagales;f__Chitinophagaceae;g__Flavitalea;s__ | 1 |
| OTU_444 | k__Bacteria;p__Acidobacteria;c__Acidobacteriia;o__Acidobacteriales;f__;g__;s__ | 0.98 |
| OTU_445 | k__Bacteria;p__Actinobacteria;c__unidentified_Actinobacteria;o__Micrococcales;f__Microbacteriaceae;g__Leucobacter | 0.97 |
| OTU_446 | k__Bacteria;p__Proteobacteria;c__Alphaproteobacteria;o__unidentified_Alphaproteobacteria;f__unidentified_Alphaproteobacteria;g__Parvibaculum;s__ | 1 |
| OTU_447 | k__Bacteria;p__Proteobacteria;c__Gammaproteobacteria;o__Xanthomonadales;f__Rhodanobacteraceae | 0.98 |
| OTU_1621 | k__Bacteria;p__Verrucomicrobia;c__Verrucomicrobiae;o__;f__;g__;s__ | 0.83 |
| OTU_949 | k__Bacteria;p__Proteobacteria;c__Gammaproteobacteria;o__Enterobacteriales;f__Enterobacteriaceae;g__Arsenophonus | 0.99 |
| OTU_948 | k__Bacteria;p__Bacteroidetes;c__Bacteroidia;o__Bacteroidales;f__Rikenellaceae | 1 |
| OTU_2630 | k__Bacteria;p__Firmicutes;c__Bacilli;o__Bacillales;f__unidentified_Bacillales;g__Exiguobacterium | 1 |
| OTU_419 | k__Bacteria;p__Elusimicrobia | 1 |
| OTU_2631 | k__Bacteria | 1 |
| OTU_418 | k__Bacteria;p__Firmicutes;c__Bacilli;o__Lactobacillales;f__Streptococcaceae;g__Streptococcus | 1 |
| OTU_104 | k__Bacteria;p__unidentified_Bacteria;c__unidentified_Bacteria;o__unidentified_Bacteria;f__unidentified_Bacteria;g__unidentified_Bacteria | 1 |
| OTU_1169 | k__Bacteria;p__Acidobacteria;c__Acidobacteriia;o__Solibacterales;f__unidentified_Solibacterales;g__Paludibaculum;s__ | 1 |
| OTU_1168 | k__Bacteria;p__Proteobacteria;c__Alphaproteobacteria;o__Rickettsiales;f__unidentified_Rickettsiales;g__unidentified_Rickettsiales;s__ | 1 |
| OTU_1288 | k__Bacteria;p__Proteobacteria;c__Deltaproteobacteria;o__Syntrophobacterales;f__Syntrophaceae;g__unidentified_Syntrophaceae;s__Myxococcales_bacterium_enrichment_culture_clone_11380 | 1 |
| OTU_1165 | k__Bacteria;p__Proteobacteria;c__Alphaproteobacteria;o__Sphingomonadales;f__Sphingomonadaceae;g__Altererythrobacter;s__ | 0.85 |
| OTU_1164 | k__Bacteria;p__Actinobacteria;c__Acidimicrobiia;o__unidentified_Acidimicrobiia;f__unidentified_Acidimicrobiia;g__Ilumatobacter;s__ | 1 |
| OTU_1167 | k__Bacteria;p__Bacteroidetes;c__Bacteroidia;o__Bacteroidales;f__Marinifilaceae;g__Odoribacter;s__ | 1 |
| OTU_1166 | k__Bacteria;p__Bacteroidetes;c__Bacteroidia;o__Bacteroidales;f__Prevotellaceae;g__;s__ | 0.98 |
| OTU_1161 | k__Bacteria;p__Proteobacteria;c__Alphaproteobacteria;o__unidentified_Alphaproteobacteria;f__Acetobacteraceae | 1 |
| OTU_1160 | k__Bacteria;p__Proteobacteria;c__Gammaproteobacteria;o__unidentified_Gammaproteobacteria | 1 |
| OTU_1163 | k__Bacteria;p__Actinobacteria;c__Thermoleophilia;o__Solirubrobacterales | 0.92 |
| OTU_1162 | k__Bacteria | 0.97 |
| OTU_2894 | k__Bacteria;p__unidentified_Bacteria;c__unidentified_Bacteria;o__Campylobacterales | 1 |
| OTU_2895 | k__Bacteria;p__Firmicutes;c__Clostridia;o__Clostridiales;f__Ruminococcaceae | 0.94 |
| OTU_846 | k__Bacteria | 1 |
| OTU_847 | k__Bacteria;p__Proteobacteria;c__Alphaproteobacteria;o__Caulobacterales;f__Caulobacteraceae;g__;s__ | 1 |
| OTU_2890 | k__Bacteria;p__Proteobacteria;c__Alphaproteobacteria | 0.86 |
| OTU_2891 | k__Bacteria;p__Firmicutes;c__Clostridia;o__Clostridiales;f__unidentified_Clostridiales;g__unidentified_Clostridiales | 0.94 |
| OTU_2892 | k__Bacteria;p__Bacteroidetes;c__Bacteroidia;o__Bacteroidales;f__Prevotellaceae;g__unidentified_Prevotellaceae;s__Prevotella_sp_oral_clone_P4PB_83_P2 | 0.98 |
| OTU_2893 | k__Bacteria;p__Actinobacteria;c__Thermoleophilia;o__Gaiellales;f__Gaiellaceae;g__Gaiella;s__ | 1 |
| OTU_1763 | k__Bacteria;p__Actinobacteria;c__unidentified_Actinobacteria;o__Micrococcales;f__Microbacteriaceae;g__Agromyces | 0.94 |
| OTU_1762 | k__Bacteria;p__Bacteroidetes;c__Bacteroidia;o__Chitinophagales;f__Chitinophagaceae;g__Chitinophaga;s__Chitinophaga_arvensicola | 0.95 |
| OTU_1761 | k__Bacteria;p__Proteobacteria;c__Alphaproteobacteria;o__Sphingomonadales;f__Sphingomonadaceae | 1 |
| OTU_869 | k__Bacteria;p__Proteobacteria;c__Gammaproteobacteria;o__unidentified_Gammaproteobacteria;f__Chromobacteriaceae;g__Pseudogulbenkiania | 0.87 |
| OTU_848 | k__Bacteria | 1 |
| OTU_849 | k__Bacteria;p__Proteobacteria;c__Gammaproteobacteria;o__Xanthomonadales;f__Xanthomonadaceae;g__Stenotrophomonas | 1 |
| OTU_1765 | k__Bacteria;p__Actinobacteria;c__Thermoleophilia;o__Solirubrobacterales | 1 |
| OTU_1764 | k__Bacteria;p__Firmicutes;c__Negativicutes;o__Selenomonadales;f__Veillonellaceae;g__Mitsuokella;s__Mitsuokella_jalaludinii | 0.92 |
| OTU_1749 | k__Bacteria;p__Bacteroidetes;c__Bacteroidia;o__Flavobacteriales;f__unidentified_Flavobacteriales;g__Chryseobacterium | 1 |
| OTU_1289 | k__Bacteria;p__Actinobacteria;c__Thermoleophilia | 1 |
| OTU_1748 | k__Bacteria;p__Elusimicrobia;c__;o__;f__;g__;s__ | 1 |
| OTU_347 | k__Bacteria;p__Actinobacteria;c__unidentified_Actinobacteria;o__Micromonosporales;f__Micromonosporaceae | 1 |
| OTU_2910 | k__Bacteria;p__Acidobacteria;c__unidentified_Acidobacteria;o__unidentified_Acidobacteria;f__unidentified_Acidobacteria | 1 |
| OTU_346 | k__Bacteria;p__Firmicutes;c__Clostridia;o__Clostridiales;f__Ruminococcaceae;g__Ruminiclostridium;s__[Clostridium]_leptum | 0.99 |
| OTU_345 | k__Archaea;p__Thaumarchaeota;c__Nitrososphaeria;o__Nitrosopumilales;f__Nitrosopumilaceae;g__;s__ | 0.97 |
| OTU_1769 | k__Bacteria;p__Gracilibacteria;c__unidentified_Gracilibacteria;o__unidentified_Gracilibacteria;f__unidentified_Gracilibacteria;g__unidentified_Gracilibacteria | 0.88 |
| OTU_1378 | k__Bacteria;p__Bacteroidetes;c__Bacteroidia;o__Bacteroidales;f__Bacteroidaceae;g__Bacteroides | 1 |
| OTU_1379 | k__Bacteria;p__Proteobacteria;c__Gammaproteobacteria;o__Oceanospirillales | 1 |
| OTU_1374 | k__Bacteria;p__Bacteroidetes;c__Bacteroidia;o__Bacteroidales;f__Bacteroidaceae;g__Bacteroides | 0.96 |
| OTU_1375 | k__Bacteria;p__Planctomycetes;c__;o__;f__;g__;s__ | 0.99 |
| OTU_1376 | k__Bacteria;p__Firmicutes;c__Clostridia;o__Clostridiales;f__Lachnospiraceae;g__Tyzzerella;s__ | 1 |
| OTU_1377 | k__Bacteria;p__Chloroflexi | 0.85 |
| OTU_1370 | k__Bacteria;p__Verrucomicrobia;c__Verrucomicrobiae;o__Verrucomicrobiales;f__Rubritaleaceae;g__Luteolibacter | 1 |
| OTU_1371 | k__Bacteria;p__Proteobacteria;c__Alphaproteobacteria;o__Rhizobiales;f__unidentified_Rhizobiales;g__Pelagibacterium;s__ | 1 |
| OTU_1372 | k__Bacteria;p__Proteobacteria;c__Gammaproteobacteria;o__Pseudomonadales;f__Moraxellaceae;g__Moraxella | 0.98 |
| OTU_1373 | k__Bacteria;p__Bacteroidetes;c__Bacteroidia;o__Chitinophagales;f__Chitinophagaceae;g__Cnuella;s__ | 0.9 |
| OTU_343 | k__Bacteria;p__unidentified_Bacteria;c__unidentified_Bacteria;o__unidentified_Bacteria;f__unidentified_Bacteria | 0.88 |
| OTU_342 | k__Bacteria;p__Proteobacteria;c__Alphaproteobacteria;o__Rhizobiales;f__Rhizobiaceae | 1 |
| OTU_1200 | k__Bacteria;p__Firmicutes;c__Erysipelotrichia;o__Erysipelotrichales;f__Erysipelotrichaceae;g__Holdemanella;s__ | 1 |
| OTU_1201 | k__Bacteria;p__Acidobacteria;c__Acidobacteriia;o__;f__;g__;s__ | 1 |
| OTU_1202 | k__Bacteria;p__Proteobacteria;c__Deltaproteobacteria;o__Myxococcales;f__Polyangiaceae;g__;s__ | 0.99 |
| OTU_1203 | k__Bacteria;p__Chloroflexi;c__Ktedonobacteria;o__Ktedonobacterales | 0.93 |
| OTU_1204 | k__Bacteria;p__Firmicutes;c__Clostridia;o__Clostridiales;f__Lachnospiraceae | 1 |
| OTU_1205 | k__Bacteria | 0.9 |
| OTU_1206 | k__Bacteria;p__Proteobacteria;c__Alphaproteobacteria | 0.99 |
| OTU_1207 | k__Bacteria;p__Bacteroidetes;c__Bacteroidia;o__Cytophagales;f__Microscillaceae;g__Chryseolinea;s__ | 0.91 |
| OTU_1208 | k__Bacteria;p__Proteobacteria;c__Alphaproteobacteria;o__unidentified_Alphaproteobacteria;f__Acetobacteraceae | 0.98 |
| OTU_1209 | k__Bacteria;p__Proteobacteria;c__Alphaproteobacteria;o__Sphingomonadales;f__Sphingomonadaceae;g__Altererythrobacter;s__ | 0.99 |
| OTU_1978 | k__Bacteria;p__Acidobacteria;c__Acidobacteriia;o__Solibacterales;f__;g__;s__ | 0.96 |
| OTU_1979 | k__Bacteria;p__Bacteroidetes;c__Bacteroidia;o__Flavobacteriales;f__Flavobacteriaceae;g__Flavicella;s__ | 1 |
| OTU_341 | k__Bacteria;p__Acidobacteria;c__Acidobacteriia;o__Acidobacteriales;f__unidentified_Acidobacteriales | 0.99 |
| OTU_1998 | k__Bacteria;p__unidentified_Bacteria;c__unidentified_Bacteria;o__Campylobacterales;f__unidentified_Campylobacterales;g__Arcobacter | 1 |
| OTU_1999 | k__Bacteria;p__Proteobacteria;c__Gammaproteobacteria;o__unidentified_Gammaproteobacteria;f__unidentified_Gammaproteobacteria;g__unidentified_Gammaproteobacteria | 0.99 |
| OTU_1928 | k__Bacteria;p__Proteobacteria;c__Alphaproteobacteria | 0.8 |
| OTU_1990 | k__Bacteria;p__Chloroflexi;c__Anaerolineae;o__Anaerolineales;f__Anaerolineaceae;g__;s__ | 0.84 |
| OTU_1991 | k__Bacteria;p__Cyanobacteria;c__unidentified_Cyanobacteria;o__unidentified_Cyanobacteria;f__unidentified_Cyanobacteria;g__unidentified_Cyanobacteria | 1 |
| OTU_1992 | k__Bacteria;p__Proteobacteria;c__Gammaproteobacteria;o__unidentified_Gammaproteobacteria | 0.99 |
| OTU_1993 | k__Archaea;p__Euryarchaeota;c__Methanobacteria;o__Methanobacteriales;f__Methanobacteriaceae;g__Methanobacterium;s__ | 0.99 |
| OTU_1994 | k__Bacteria;p__Proteobacteria;c__Alphaproteobacteria | 0.99 |
| OTU_1995 | k__Bacteria;p__Bacteroidetes;c__Bacteroidia;o__Bacteroidales;f__Prevotellaceae | 0.89 |
| OTU_1996 | k__Bacteria;p__Proteobacteria;c__Alphaproteobacteria;o__Rhizobiales;f__Rhizobiaceae | 0.95 |
| OTU_1997 | k__Bacteria;p__Proteobacteria;c__Gammaproteobacteria;o__unidentified_Gammaproteobacteria;f__Burkholderiaceae;g__Caenimonas | 0.83 |
| OTU_2133 | k__Bacteria;p__Bacteroidetes;c__Bacteroidia;o__Flavobacteriales;f__Flavobacteriaceae | 1 |
| OTU_2089 | k__Bacteria;p__Acidobacteria | 1 |
| OTU_2088 | k__Bacteria;p__Bacteroidetes;c__Bacteroidia;o__Flavobacteriales;f__Flavobacteriaceae;g__;s__ | 1 |
| OTU_2087 | k__Bacteria;p__Deinococcus-Thermus;c__Deinococci;o__Deinococcales;f__Trueperaceae;g__Truepera;s__ | 1 |
| OTU_2086 | k__Bacteria | 0.99 |
| OTU_2085 | k__Bacteria;p__Proteobacteria;c__Gammaproteobacteria;o__Aeromonadales;f__Aeromonadaceae | 0.85 |
| OTU_2084 | k__Bacteria | 1 |
| OTU_2083 | k__Bacteria;p__Chloroflexi;c__;o__;f__;g__;s__ | 0.98 |
| OTU_2082 | k__Bacteria;p__Actinobacteria;c__unidentified_Actinobacteria | 1 |
| OTU_2081 | k__Bacteria;p__Proteobacteria;c__Deltaproteobacteria;o__Desulfovibrionales;f__Desulfovibrionaceae;g__Desulfovibrio;s__ | 0.93 |
| OTU_2080 | k__Bacteria;p__Actinobacteria;c__unidentified_Actinobacteria;o__Bifidobacteriales;f__Bifidobacteriaceae;g__Bifidobacterium;s__Bifidobacterium_bifidum | 0.97 |
| OTU_2646 | k__Bacteria;p__Planctomycetes;c__Planctomycetacia;o__;f__;g__;s__ | 1 |
| OTU_2319 | k__Bacteria;p__Firmicutes;c__Clostridia;o__Clostridiales;f__Ruminococcaceae | 1 |
| OTU_2318 | k__Bacteria;p__Fusobacteria;c__Fusobacteriia;o__Fusobacteriales;f__Leptotrichiaceae;g__Leptotrichia;s__Leptotrichia_sp_oral_clone_IK040 | 0.99 |
| OTU_2317 | k__Bacteria | 0.99 |
| OTU_2316 | k__Bacteria;p__Proteobacteria;c__Deltaproteobacteria;o__Desulfovibrionales;f__Desulfovibrionaceae;g__Desulfovibrio | 0.93 |
| OTU_2315 | k__Bacteria | 1 |
| OTU_2314 | k__Bacteria | 1 |
| OTU_2313 | k__Bacteria;p__Verrucomicrobia;c__Verrucomicrobiae;o__;f__;g__;s__ | 0.92 |
| OTU_2312 | k__Bacteria;p__Actinobacteria;c__unidentified_Actinobacteria;o__Glycomycetales;f__Glycomycetaceae;g__Glycomyces;s__Glycomyces_harbinensis | 0.97 |
| OTU_2311 | k__Bacteria;p__Tenericutes;c__Mollicutes;o__Mycoplasmatales;f__Mycoplasmataceae;g__Candidatus_Lumbricincola;s__Candidatus_Lumbricincola_sp_Lr-C2 | 1 |
| OTU_2310 | k__Bacteria;p__Bacteroidetes;c__Ignavibacteria;o__Ignavibacteriales;f__Ignavibacteriaceae;g__Ignavibacterium;s__ | 0.99 |
| OTU_2135 | k__Bacteria;p__Firmicutes;c__Clostridia;o__Clostridiales;f__Eubacteriaceae;g__Anaerofustis;s__ | 1 |
| OTU_2134 | k__Bacteria;p__Actinobacteria;c__Coriobacteriia;o__Coriobacteriales;f__Coriobacteriaceae;g__Collinsella | 1 |
| OTU_1923 | k__Bacteria;p__Proteobacteria;c__Alphaproteobacteria;o__Rickettsiales | 0.81 |
| OTU_2537 | k__Bacteria;p__Verrucomicrobia;c__Verrucomicrobiae;o__;f__;g__;s__ | 0.89 |
| OTU_2536 | k__Bacteria;p__Chloroflexi;c__Anaerolineae;o__;f__;g__;s__ | 0.89 |
| OTU_2535 | k__Bacteria;p__Actinobacteria;c__Coriobacteriia;o__Coriobacteriales;f__Coriobacteriaceae;g__Collinsella | 1 |
| OTU_2534 | k__Bacteria | 1 |
| OTU_2533 | k__Bacteria;p__Firmicutes;c__Clostridia;o__Clostridiales;f__Ruminococcaceae | 1 |
| OTU_2532 | k__Bacteria;p__Firmicutes;c__Clostridia;o__Clostridiales;f__unidentified_Clostridiales;g__Ezakiella;s__[Bacteroides]_coagulans | 1 |
| OTU_2531 | k__Bacteria;p__Firmicutes;c__Clostridia;o__Clostridiales;f__Ruminococcaceae | 1 |
| OTU_2530 | k__Bacteria;p__Firmicutes;c__Clostridia;o__Clostridiales;f__Ruminococcaceae | 1 |
| OTU_741 | k__Bacteria;p__Actinobacteria;c__unidentified_Actinobacteria;o__Micrococcales;f__Brevibacteriaceae;g__Brevibacterium | 1 |
| OTU_2539 | k__Bacteria;p__Fibrobacteres;c__Fibrobacteria;o__Fibrobacterales;f__Fibrobacteraceae;g__Fibrobacter;s__bacterium_NC3008 | 0.81 |
| OTU_2538 | k__Bacteria;p__Bacteroidetes;c__Bacteroidia;o__Chitinophagales;f__Chitinophagaceae;g__Ferruginibacter;s__ | 1 |
| OTU_740 | k__Bacteria;p__Firmicutes;c__Clostridia;o__Clostridiales;f__Lachnospiraceae | 1 |
| OTU_1468 | k__Bacteria;p__unidentified_Bacteria;c__unidentified_Bacteria;o__unidentified_Bacteria;f__unidentified_Bacteria;g__unidentified_Bacteria | 1 |
| OTU_746 | k__Bacteria;p__Proteobacteria;c__Alphaproteobacteria;o__Rhodobacterales;f__Rhodobacteraceae | 1 |
| OTU_745 | k__Bacteria;p__Firmicutes;c__Clostridia;o__Clostridiales;f__Ruminococcaceae | 1 |
| OTU_744 | k__Bacteria;p__Firmicutes;c__Bacilli;o__Lactobacillales;f__Lactobacillaceae;g__Lactobacillus | 1 |
| OTU_2403 | k__Bacteria;p__Acidobacteria;c__Acidobacteriia;o__Acidobacteriales;f__unidentified_Acidobacteriales | 1 |
| OTU_2402 | k__Bacteria;p__Actinobacteria;c__unidentified_Actinobacteria;o__Corynebacteriales;f__Mycobacteriaceae;g__Mycobacterium | 1 |
| OTU_2401 | k__Bacteria;p__Gemmatimonadetes;c__unidentified_Gemmatimonadetes;o__Gemmatimonadales;f__Gemmatimonadaceae;g__;s__ | 0.84 |
| OTU_2400 | k__Bacteria;p__Acidobacteria | 1 |
| OTU_2407 | k__Bacteria;p__Firmicutes;c__Negativicutes;o__Selenomonadales;f__Veillonellaceae;g__Megamonas;s__ | 0.92 |
| OTU_2406 | k__Bacteria;p__Proteobacteria;c__Gammaproteobacteria;o__unidentified_Gammaproteobacteria;f__Methylophilaceae;g__unidentified_Methylophilaceae;s__Methylophilus_sp_La2-4_HL-2016 | 0.93 |
| OTU_2405 | k__Bacteria;p__Proteobacteria;c__Alphaproteobacteria;o__unidentified_Alphaproteobacteria;f__Acetobacteraceae;g__Roseococcus;s__ | 1 |
| OTU_2404 | k__Bacteria;p__Firmicutes;c__Clostridia;o__Clostridiales;f__unidentified_Clostridiales;g__Sedimentibacter | 1 |
| OTU_2409 | k__Bacteria;p__Proteobacteria;c__Deltaproteobacteria;o__Oligoflexales;f__;g__;s__ | 0.99 |
| OTU_2408 | k__Bacteria;p__Proteobacteria;c__Alphaproteobacteria;o__Rhizobiales;f__Xanthobacteraceae;g__;s__ | 0.86 |
| OTU_749 | k__Bacteria;p__Firmicutes;c__Clostridia;o__Clostridiales;f__Peptostreptococcaceae;g__unidentified_Peptostreptococcaceae | 0.98 |
| OTU_2629 | k__Bacteria;p__Bacteroidetes;c__Bacteroidia;o__Bacteroidales;f__Prevotellaceae;g__unidentified_Prevotellaceae;s__Prevotella_corporis | 1 |
| OTU_2628 | k__Bacteria;p__Proteobacteria;c__Gammaproteobacteria;o__Xanthomonadales;f__Rhodanobacteraceae;g__Dyella | 0.82 |
| OTU_509 | k__Bacteria;p__Proteobacteria;c__Gammaproteobacteria;o__unidentified_Gammaproteobacteria;f__Burkholderiaceae | 1 |
| OTU_508 | k__Bacteria;p__Firmicutes;c__Clostridia;o__Clostridiales;f__Ruminococcaceae;g__unidentified_Ruminococcaceae | 0.8 |
| OTU_505 | k__Bacteria;p__Bacteroidetes;c__Bacteroidia;o__Chitinophagales;f__Saprospiraceae;g__;s__ | 0.93 |
| OTU_504 | k__Bacteria;p__Proteobacteria;c__Alphaproteobacteria;o__Rhizobiales;f__;g__;s__ | 0.84 |
| OTU_507 | k__Bacteria;p__Proteobacteria;c__Alphaproteobacteria;o__Rhizobiales | 1 |
| OTU_506 | k__Bacteria;p__Actinobacteria;c__unidentified_Actinobacteria;o__Micromonosporales;f__Micromonosporaceae | 1 |
| OTU_2627 | k__Bacteria;p__Firmicutes;c__Bacilli;o__Lactobacillales;f__Lactobacillaceae;g__Lactobacillus | 1 |
| OTU_500 | k__Bacteria;p__Proteobacteria;c__Alphaproteobacteria;o__Caulobacterales;f__Hyphomonadaceae;g__Hyphomonas;s__Hyphomonas_jannaschiana | 1 |
| OTU_503 | k__Bacteria;p__Actinobacteria;c__unidentified_Actinobacteria;o__Actinomycetales;f__Actinomycetaceae;g__Actinomyces | 0.94 |
| OTU_502 | k__Bacteria;p__Actinobacteria;c__Acidimicrobiia | 1 |
| OTU_1463 | k__Bacteria;p__Proteobacteria;c__Gammaproteobacteria;o__Cellvibrionales;f__Halieaceae | 1 |
| OTU_32 | k__Bacteria;p__Proteobacteria;c__Gammaproteobacteria;o__Vibrionales;f__Vibrionaceae;g__Vibrio;s__Vibrio_gigantis | 0.89 |
| OTU_33 | k__Bacteria;p__Firmicutes;c__Bacilli;o__Bacillales;f__Staphylococcaceae | 1 |
| OTU_30 | k__Bacteria;p__Firmicutes;c__Clostridia;o__Clostridiales;f__Peptostreptococcaceae;g__Tepidibacter;s__ | 1 |
| OTU_31 | k__Bacteria;p__Proteobacteria;c__Gammaproteobacteria;o__Xanthomonadales;f__Xanthomonadaceae;g__Lysobacter | 0.99 |
| OTU_36 | k__Bacteria;p__Firmicutes;c__Clostridia;o__Clostridiales | 1 |
| OTU_37 | k__Bacteria;p__Firmicutes;c__Clostridia;o__Clostridiales;f__Peptostreptococcaceae;g__Peptostreptococcus;s__Peptostreptococcus_russellii | 0.81 |
| OTU_34 | k__Bacteria;p__Bacteroidetes;c__Bacteroidia;o__Bacteroidales;f__Barnesiellaceae;g__;s__ | 0.96 |
| OTU_35 | k__Bacteria;p__Proteobacteria;c__Gammaproteobacteria;o__Pseudomonadales;f__Moraxellaceae;g__Acinetobacter;s__Acinetobacter_lwoffii | 1 |
| OTU_38 | k__Bacteria;p__Proteobacteria;c__Gammaproteobacteria;o__Xanthomonadales;f__Xanthomonadaceae;g__Stenotrophomonas | 1 |
| OTU_39 | k__Bacteria;p__Fusobacteria;c__Fusobacteriia;o__Fusobacteriales;f__Fusobacteriaceae;g__Fusobacterium;s__ | 0.89 |
| OTU_3040 | k__Bacteria;p__Actinobacteria;c__Acidimicrobiia | 0.81 |
| OTU_3041 | k__Bacteria;p__Firmicutes;c__Clostridia;o__Clostridiales;f__Ruminococcaceae;g__unidentified_Ruminococcaceae | 1 |
| OTU_3042 | k__Bacteria;p__Proteobacteria;c__Gammaproteobacteria;o__Oceanospirillales;f__Halomonadaceae;g__Halomonas;s__Halomonas_sp_PR-M31 | 0.98 |
| OTU_3043 | k__Bacteria;p__Armatimonadetes;c__Armatimonadia;o__Armatimonadales;f__;g__;s__ | 0.95 |
| OTU_3044 | k__Bacteria;p__Proteobacteria;c__Gammaproteobacteria;o__unidentified_Gammaproteobacteria;f__unidentified_Gammaproteobacteria;g__Aquicella;s__ | 0.94 |
| OTU_3045 | k__Bacteria;p__Acidobacteria;c__unidentified_Acidobacteria;o__unidentified_Acidobacteria;f__Pyrinomonadaceae;g__;s__ | 1 |
| OTU_3046 | k__Bacteria;p__Planctomycetes;c__Phycisphaerae;o__Tepidisphaerales;f__;g__;s__ | 0.97 |
| OTU_3047 | k__Bacteria;p__Firmicutes;c__Clostridia;o__Clostridiales;f__Ruminococcaceae | 0.97 |
| OTU_3048 | k__Bacteria;p__Firmicutes;c__Negativicutes;o__Selenomonadales;f__Veillonellaceae;g__Megasphaera;s__ | 0.85 |
| OTU_628 | k__Bacteria;p__Acidobacteria;c__;o__;f__;g__;s__ | 0.86 |
| OTU_629 | k__Bacteria;p__Bacteroidetes;c__Bacteroidia;o__Bacteroidales;f__Muribaculaceae;g__;s__ | 0.94 |
| OTU_198 | k__Bacteria;p__Acidobacteria;c__Acidobacteriia;o__Acidobacteriales;f__unidentified_Acidobacteriales;g__Acidipila;s__ | 0.83 |
| OTU_199 | k__Bacteria;p__Actinobacteria;c__unidentified_Actinobacteria;o__Propionibacteriales;f__Nocardioidaceae;g__Nocardioides | 1 |
| OTU_619 | k__Bacteria;p__Actinobacteria;c__Thermoleophilia;o__Solirubrobacterales;f__;g__;s__ | 1 |
| OTU_618 | k__Bacteria;p__Proteobacteria;c__Alphaproteobacteria;o__Sphingomonadales;f__Sphingomonadaceae;g__Sphingorhabdus | 1 |
| OTU_1574 | k__Bacteria;p__Proteobacteria;c__Gammaproteobacteria;o__unidentified_Gammaproteobacteria | 0.9 |
| OTU_1575 | k__Bacteria;p__Proteobacteria;c__Gammaproteobacteria;o__Alteromonadales;f__Colwelliaceae;g__Thalassotalea | 1 |
| OTU_1572 | k__Bacteria;p__Actinobacteria;c__Acidimicrobiia;o__;f__;g__;s__ | 0.92 |
| OTU_1573 | k__Bacteria;p__Proteobacteria;c__Gammaproteobacteria | 0.97 |
| OTU_1570 | k__Bacteria;p__Planctomycetes;c__Phycisphaerae;o__Tepidisphaerales;f__;g__;s__ | 1 |
| OTU_1571 | k__Bacteria;p__Proteobacteria;c__Deltaproteobacteria | 1 |
| OTU_611 | k__Bacteria;p__Proteobacteria;c__Gammaproteobacteria;o__unidentified_Gammaproteobacteria;f__unidentified_Gammaproteobacteria;g__Acidibacter;s__ | 0.98 |
| OTU_610 | k__Bacteria;p__Proteobacteria;c__Gammaproteobacteria;o__Oceanospirillales;f__unidentified_Oceanospirillales;g__unidentified_Oceanospirillales;s__Alcanivoracaceae_bacterium_GI5 | 0.98 |
| OTU_613 | k__Bacteria;p__Actinobacteria;c__unidentified_Actinobacteria;o__Propionibacteriales;f__Nocardioidaceae;g__Nocardioides | 0.97 |
| OTU_612 | k__Bacteria;p__Chloroflexi;c__Ktedonobacteria;o__Ktedonobacterales;f__Ktedonobacteraceae | 0.85 |
| OTU_615 | k__Bacteria;p__Proteobacteria;c__Alphaproteobacteria;o__Sphingomonadales;f__Sphingomonadaceae;g__Sphingobium | 0.85 |
| OTU_614 | k__Bacteria;p__Actinobacteria;c__unidentified_Actinobacteria;o__Frankiales;f__Sporichthyaceae;g__;s__ | 0.97 |
| OTU_617 | k__Bacteria;p__Actinobacteria;c__unidentified_Actinobacteria;o__Micromonosporales;f__Micromonosporaceae;g__Actinoplanes | 0.97 |
| OTU_616 | k__Bacteria;p__Firmicutes;c__Erysipelotrichia;o__Erysipelotrichales;f__Erysipelotrichaceae | 0.98 |
| OTU_195 | k__Bacteria;p__Proteobacteria;c__Gammaproteobacteria;o__Oceanospirillales | 0.91 |
| OTU_620 | k__Bacteria;p__Proteobacteria;c__Alphaproteobacteria;o__unidentified_Alphaproteobacteria;f__unidentified_Alphaproteobacteria | 0.91 |
| OTU_1576 | k__Bacteria;p__Proteobacteria;c__Alphaproteobacteria;o__Rhodospirillales;f__;g__;s__ | 0.99 |
| OTU_621 | k__Bacteria;p__Proteobacteria;c__Alphaproteobacteria;o__Rhizobiales | 0.99 |
| OTU_299 | k__Bacteria;p__Proteobacteria;c__Gammaproteobacteria;o__unidentified_Gammaproteobacteria;f__unidentified_Gammaproteobacteria;g__unidentified_Gammaproteobacteria;s__Hypsibius_dujardini | 0.92 |
| OTU_298 | k__Bacteria;p__Proteobacteria;c__Alphaproteobacteria;o__Rhodobacterales;f__Rhodobacteraceae | 1 |
| OTU_295 | k__Bacteria;p__unidentified_Bacteria;c__unidentified_Bacteria;o__unidentified_Bacteria;f__unidentified_Bacteria;g__unidentified_Bacteria | 1 |
| OTU_294 | k__Bacteria;p__Firmicutes;c__Bacilli;o__Bacillales;f__Planococcaceae;g__Chryseomicrobium;s__ | 0.94 |
| OTU_297 | k__Bacteria;p__Firmicutes;c__Clostridia;o__Clostridiales;f__unidentified_Clostridiales;g__Parvimonas;s__ | 1 |
| OTU_296 | k__Bacteria;p__Bacteroidetes;c__Rhodothermia;o__Rhodothermales;f__Rhodothermaceae;g__;s__ | 1 |
| OTU_291 | k__Bacteria;p__Bacteroidetes;c__Bacteroidia;o__Bacteroidales;f__Prevotellaceae | 1 |
| OTU_290 | k__Bacteria;p__Firmicutes;c__Clostridia;o__Clostridiales;f__unidentified_Clostridiales;g__unidentified_Clostridiales;s__Clostridium_intestinale | 0.99 |
| OTU_293 | k__Bacteria;p__Proteobacteria;c__Deltaproteobacteria | 0.97 |
| OTU_292 | k__Bacteria;p__Firmicutes;c__Clostridia;o__Clostridiales;f__unidentified_Clostridiales;g__Finegoldia;s__ | 1 |
| OTU_475 | k__Bacteria;p__Proteobacteria;c__Deltaproteobacteria;o__Bdellovibrionales;f__Bacteriovoracaceae;g__Peredibacter;s__ | 0.96 |
| OTU_474 | k__Bacteria;p__Bacteroidetes;c__Bacteroidia;o__Bacteroidales;f__Muribaculaceae;g__;s__ | 0.98 |
| OTU_477 | k__Bacteria;p__Spirochaetes;c__Spirochaetia;o__Spirochaetales;f__Spirochaetaceae;g__unidentified_Spirochaetaceae | 1 |
| OTU_476 | k__Bacteria;p__Proteobacteria;c__Gammaproteobacteria;o__Pseudomonadales;f__Pseudomonadaceae;g__Pseudomonas;s__Pseudomonas_caeni | 1 |
| OTU_2951 | k__Bacteria;p__Actinobacteria;c__unidentified_Actinobacteria;o__Corynebacteriales;f__Nocardiaceae;g__Nocardia | 1 |
| OTU_470 | k__Bacteria;p__Actinobacteria;c__unidentified_Actinobacteria;o__Frankiales;f__Acidothermaceae;g__Acidothermus;s__ | 1 |
| OTU_473 | k__Bacteria;p__Acidobacteria;c__Acidobacteriia;o__Acidobacteriales;f__unidentified_Acidobacteriales;g__Acidipila;s__ | 0.82 |
| OTU_472 | k__Bacteria;p__Firmicutes;c__Clostridia;o__Clostridiales;f__Christensenellaceae;g__unidentified_Christensenellaceae;s__iron-reducing_bacterium_enrichment_culture_clone_HN109 | 0.97 |
| OTU_1684 | k__Bacteria;p__Bacteroidetes;c__Bacteroidia;o__Bacteroidales | 1 |
| OTU_1685 | k__Bacteria;p__Actinobacteria;c__Thermoleophilia;o__Solirubrobacterales;f__Solirubrobacteraceae | 0.96 |
| OTU_1686 | k__Bacteria;p__Acidobacteria;c__Acidobacteriia;o__Acidobacteriales;f__;g__;s__ | 0.99 |
| OTU_1687 | k__Bacteria;p__Firmicutes;c__Bacilli;o__Lactobacillales | 0.96 |
| OTU_479 | k__Bacteria | 1 |
| OTU_478 | k__Bacteria;p__Actinobacteria;c__unidentified_Actinobacteria;o__Micrococcales;f__Demequinaceae;g__;s__ | 0.96 |
| OTU_1682 | k__Bacteria;p__Planctomycetes;c__Planctomycetacia;o__;f__;g__;s__ | 1 |
| OTU_1683 | k__Bacteria;p__Proteobacteria;c__Gammaproteobacteria | 0.96 |
| OTU_277 | k__Bacteria;p__Proteobacteria;c__Alphaproteobacteria;o__unidentified_Alphaproteobacteria;f__Acetobacteraceae | 1 |
| OTU_276 | k__Bacteria;p__Bacteroidetes;c__Bacteroidia;o__Bacteroidales;f__Muribaculaceae;g__;s__ | 1 |
| OTU_275 | k__Bacteria;p__Proteobacteria;c__Gammaproteobacteria;o__Cardiobacteriales;f__Cardiobacteriaceae;g__Cardiobacterium;s__Cardiobacterium_valvarum | 0.93 |
| OTU_274 | k__Bacteria;p__Proteobacteria;c__Alphaproteobacteria;o__Rhizobiales;f__Rhizobiaceae | 1 |
| OTU_273 | k__Bacteria;p__Bacteroidetes;c__Bacteroidia;o__Bacteroidales;f__Rikenellaceae;g__;s__ | 1 |
| OTU_272 | k__Bacteria;p__Proteobacteria;c__Gammaproteobacteria;o__unidentified_Gammaproteobacteria;f__unidentified_Gammaproteobacteria;g__Acidibacter;s__ | 0.96 |
| OTU_271 | k__Bacteria;p__Proteobacteria;c__Alphaproteobacteria;o__unidentified_Alphaproteobacteria;f__unidentified_Alphaproteobacteria;g__Candidatus_Puniceispirillum;s__ | 1 |
| OTU_270 | k__Bacteria;p__Actinobacteria;c__Acidimicrobiia | 1 |
| OTU_1422 | k__Bacteria;p__Bacteroidetes;c__Bacteroidia;o__Bacteroidales;f__Muribaculaceae;g__;s__ | 0.99 |
| OTU_279 | k__Bacteria;p__Proteobacteria;c__Gammaproteobacteria;o__unidentified_Gammaproteobacteria;f__Burkholderiaceae;g__Achromobacter | 0.82 |
| OTU_278 | k__Bacteria;p__Firmicutes;c__Clostridia;o__Clostridiales;f__Lachnospiraceae;g__unidentified_Lachnospiraceae;s__Lachnospiraceae_bacterium_10-1 | 0.94 |
| OTU_2131 | k__Bacteria;p__Actinobacteria;c__unidentified_Actinobacteria;o__Micromonosporales;f__Micromonosporaceae | 0.9 |
| OTU_2127 | k__Bacteria;p__Proteobacteria;c__Alphaproteobacteria | 0.92 |
| OTU_1190 | k__Bacteria;p__Proteobacteria;c__Gammaproteobacteria;o__Cellvibrionales;f__Spongiibacteraceae;g__;s__ | 1 |
| OTU_1191 | k__Bacteria;p__Proteobacteria;c__Gammaproteobacteria | 0.98 |
| OTU_1192 | k__Bacteria;p__Acidobacteria;c__Acidobacteriia;o__Solibacterales;f__unidentified_Solibacterales;g__Bryobacter;s__ | 0.98 |
| OTU_1193 | k__Bacteria;p__Bacteroidetes;c__Bacteroidia;o__Bacteroidales;f__Bacteroidaceae;g__Bacteroides;s__Bacteroides_graminisolvens | 1 |
| OTU_1194 | k__Bacteria;p__Firmicutes;c__Clostridia;o__Clostridiales;f__unidentified_Clostridiales;g__unidentified_Clostridiales | 0.94 |
| OTU_1195 | k__Bacteria;p__Proteobacteria;c__Alphaproteobacteria;o__unidentified_Alphaproteobacteria;f__unidentified_Alphaproteobacteria | 0.91 |
| OTU_1196 | k__Bacteria;p__Firmicutes;c__Clostridia;o__Clostridiales;f__Lachnospiraceae | 0.99 |
| OTU_1197 | k__Bacteria;p__Actinobacteria;c__Acidimicrobiia;o__;f__;g__;s__ | 0.95 |
| OTU_1198 | k__Bacteria;p__Firmicutes;c__Bacilli;o__Bacillales;f__Bacillaceae;g__Bacillus | 0.93 |
| OTU_1199 | k__Bacteria;p__Firmicutes;c__Clostridia;o__Clostridiales;f__Lachnospiraceae | 0.96 |
| OTU_871 | k__Bacteria;p__Proteobacteria;c__Alphaproteobacteria;o__Rickettsiales;f__;g__;s__ | 0.94 |
| OTU_870 | k__Bacteria;p__Chloroflexi;c__Anaerolineae;o__Anaerolineales;f__Anaerolineaceae;g__;s__ | 0.98 |
| OTU_873 | k__Bacteria;p__Proteobacteria;c__Deltaproteobacteria;o__Desulfobacterales;f__Desulfobacteraceae | 1 |
| OTU_872 | k__Bacteria;p__Proteobacteria;c__Alphaproteobacteria;o__Rhodobacterales;f__Rhodobacteraceae | 1 |
| OTU_875 | k__Bacteria;p__Bacteroidetes;c__Bacteroidia;o__Bacteroidales;f__Muribaculaceae;g__;s__ | 1 |
| OTU_874 | k__Bacteria;p__Proteobacteria;c__Gammaproteobacteria;o__unidentified_Gammaproteobacteria;f__Rhodocyclaceae;g__Thauera | 0.81 |
| OTU_877 | k__Bacteria;p__Verrucomicrobia;c__Verrucomicrobiae;o__Opitutales;f__Opitutaceae | 1 |
| OTU_2880 | k__Bacteria;p__Cyanobacteria;c__unidentified_Cyanobacteria;o__unidentified_Cyanobacteria;f__unidentified_Cyanobacteria;g__unidentified_Cyanobacteria | 0.98 |
| OTU_879 | k__Bacteria;p__Firmicutes;c__Clostridia;o__Clostridiales;f__Ruminococcaceae;g__Ruminiclostridium;s__ | 0.84 |
| OTU_878 | k__Bacteria;p__Bacteroidetes;c__Bacteroidia;o__Bacteroidales;f__Rikenellaceae;g__Alistipes;s__Alistipes_sp_CHKCI003 | 0.85 |
| OTU_1754 | k__Bacteria;p__Acidobacteria;c__Acidobacteriia;o__Acidobacteriales | 1 |
| OTU_1755 | k__Bacteria;p__Proteobacteria;c__Alphaproteobacteria;o__Sphingomonadales;f__Sphingomonadaceae;g__Sphingomonas | 0.99 |
| OTU_1752 | k__Bacteria;p__Bacteroidetes;c__Bacteroidia;o__Cytophagales;f__Microscillaceae | 1 |
| OTU_1753 | k__Bacteria;p__Bacteroidetes;c__Bacteroidia;o__Bacteroidales;f__Rikenellaceae;g__;s__ | 1 |
| OTU_1750 | k__Bacteria;p__Proteobacteria;c__Alphaproteobacteria;o__Rhizobiales;f__Rhizobiaceae | 1 |
| OTU_2888 | k__Bacteria;p__Firmicutes;c__Clostridia;o__Clostridiales;f__unidentified_Clostridiales | 0.97 |
| OTU_1024 | k__Bacteria;p__Bacteroidetes;c__Bacteroidia | 0.99 |
| OTU_2942 | k__Bacteria;p__Planctomycetes;c__Planctomycetacia;o__unidentified_Planctomycetacia;f__unidentified_Planctomycetacia;g__Blastopirellula;s__ | 0.82 |
| OTU_997 | k__Bacteria | 1 |
| OTU_994 | k__Bacteria;p__Chloroflexi;c__Ktedonobacteria;o__Ktedonobacterales | 0.82 |
| OTU_984 | k__Bacteria;p__Proteobacteria;c__Alphaproteobacteria;o__Caulobacterales;f__Parvularculaceae;g__;s__ | 0.96 |
| OTU_995 | k__Bacteria;p__Chloroflexi;c__Ktedonobacteria;o__Ktedonobacterales;f__Ktedonobacteraceae;g__;s__ | 0.96 |
| OTU_1369 | k__Bacteria;p__Proteobacteria;c__Alphaproteobacteria;o__Rickettsiales;f__unidentified_Rickettsiales;g__unidentified_Rickettsiales;s__ | 0.91 |
| OTU_1368 | k__Bacteria;p__Actinobacteria;c__unidentified_Actinobacteria;o__Micromonosporales;f__Micromonosporaceae | 0.97 |
| OTU_1367 | k__Bacteria;p__Firmicutes;c__Bacilli;o__Lactobacillales;f__Streptococcaceae;g__Streptococcus | 1 |
| OTU_992 | k__Bacteria;p__Actinobacteria;c__Thermoleophilia;o__Gaiellales;f__unidentified_Gaiellales;g__unidentified_Gaiellales;s__bacterium_Ellin6515 | 1 |
| OTU_1365 | k__Bacteria;p__Actinobacteria;c__Acidimicrobiia;o__unidentified_Acidimicrobiia;f__unidentified_Acidimicrobiia;g__unidentified_Acidimicrobiia;s\_\_bacterium\_enrichment\_culture\_clone\_B97 | 0.99 |
| OTU_1364 | k__Bacteria;p__Proteobacteria;c__Gammaproteobacteria;o__Oceanospirillales;f__Halomonadaceae;g__unidentified_Halomonadaceae;s__gamma_proteobacterium_HdN1 | 1 |
| OTU_1363 | k__Bacteria;p__Firmicutes;c__Clostridia;o__Clostridiales;f__Ruminococcaceae;g__;s__ | 0.85 |
| OTU_1362 | k__Bacteria;p__Firmicutes;c__Clostridia;o__Clostridiales;f__Lachnospiraceae | 0.99 |
| OTU_1361 | k__Bacteria;p__Firmicutes;c__Clostridia;o__Clostridiales;f__Ruminococcaceae | 1 |
| OTU_1360 | k__Bacteria;p__Firmicutes;c__Bacilli;o__Bacillales;f__Bacillaceae;g__Bacillus | 0.94 |
| OTU_990 | k__Bacteria;p__Bacteroidetes;c__Bacteroidia;o__Bacteroidales;f__Muribaculaceae;g__;s__ | 0.98 |
| OTU_2052 | k__Bacteria;p__Proteobacteria;c__Gammaproteobacteria;o__Enterobacteriales;f__Enterobacteriaceae | 1 |
| OTU_987 | k__Bacteria;p__Bacteroidetes;c__Bacteroidia;o__Chitinophagales;f__Saprospiraceae;g__;s__ | 0.97 |
| OTU_1819 | k__Bacteria;p__Proteobacteria;c__Gammaproteobacteria;o__unidentified_Gammaproteobacteria;f__Burkholderiaceae | 1 |
| OTU_2363 | k__Bacteria;p__Proteobacteria;c__Alphaproteobacteria;o__Rickettsiales;f__unidentified_Rickettsiales;g__unidentified_Rickettsiales;s__ | 0.92 |
| OTU_1020 | k__Bacteria;p__Proteobacteria;c__Gammaproteobacteria | 1 |
| OTU_2053 | k__Bacteria;p__Proteobacteria;c__Deltaproteobacteria;o__Desulfuromonadales;f__Geobacteraceae;g__Geobacter;s__ | 0.91 |
| OTU_986 | k__Bacteria;p__Bacteroidetes;c__Bacteroidia;o__Flavobacteriales;f__Flavobacteriaceae;g__Flavobacterium | 0.99 |
| OTU_1213 | k__Bacteria;p__unidentified_Bacteria;c__unidentified_Bacteria;o__unidentified_Bacteria;f__unidentified_Bacteria;g__unidentified_Bacteria;s__TM7_phylum_sp_canine_oral_taxon_308 | 1 |
| OTU_1212 | k__Bacteria;p__Bacteroidetes;c__Bacteroidia;o__Bacteroidales;f__Bacteroidaceae;g__Bacteroides;s__ | 0.9 |
| OTU_1211 | k__Bacteria;p__Latescibacteria;c__;o__;f__;g__;s__ | 0.98 |
| OTU_1210 | k__Bacteria;p__Proteobacteria;c__Alphaproteobacteria;o__Sphingomonadales;f__Sphingomonadaceae;g__Erythrobacter | 0.99 |
| OTU_1217 | k__Bacteria;p__Acidobacteria;c__Acidobacteriia;o__Acidobacteriales;f__;g__;s__ | 0.9 |
| OTU_1216 | k__Bacteria;p__Firmicutes;c__Clostridia;o__Clostridiales;f__Lachnospiraceae;g__Lachnospira | 1 |
| OTU_1215 | k__Bacteria;p__Firmicutes;c__Clostridia;o__Clostridiales;f__Ruminococcaceae | 1 |
| OTU_1214 | k__Bacteria;p__Firmicutes;c__Clostridia;o__Clostridiales;f__Ruminococcaceae;g__Angelakisella;s__ | 1 |
| OTU_1219 | k__Bacteria;p__Tenericutes;c__Mollicutes;o__Mycoplasmatales;f__Mycoplasmataceae;g__Mycoplasma;s__ | 0.83 |
| OTU_1218 | k__Bacteria;p__Proteobacteria;c__Alphaproteobacteria;o__unidentified_Alphaproteobacteria;f__unidentified_Alphaproteobacteria | 0.9 |
| OTU_1969 | k__Bacteria;p__Melainabacteria;c__unidentified_Melainabacteria;o__Obscuribacterales;f__;g__;s__ | 1 |
| OTU_1968 | k__Bacteria;p__Actinobacteria;c__Thermoleophilia;o__Gaiellales;f__;g__;s__ | 0.99 |
| OTU_2368 | k__Bacteria;p__Proteobacteria;c__Gammaproteobacteria;o__Vibrionales;f__Vibrionaceae;g__Vibrio;s__Vibrio_nereis | 0.9 |
| OTU_2369 | k__Bacteria;p__Firmicutes;c__Clostridia;o__Clostridiales;f__Ruminococcaceae;g__Flavonifractor;s__ | 0.86 |
| OTU_1989 | k__Bacteria | 0.97 |
| OTU_1988 | k__Bacteria;p__Bacteroidetes;c__Bacteroidia;o__Flavobacteriales;f__Crocinitomicaceae;g__Fluviicola;s__ | 0.88 |
| OTU_1983 | k__Bacteria;p__Proteobacteria;c__Gammaproteobacteria;o__unidentified_Gammaproteobacteria;f__unidentified_Gammaproteobacteria;g__Acidibacter;s__ | 0.87 |
| OTU_1982 | k__Bacteria;p__Firmicutes;c__Clostridia;o__Clostridiales;f__Christensenellaceae;g__;s__ | 1 |
| OTU_1981 | k__Bacteria;p__Bacteroidetes;c__Ignavibacteria;o__;f__;g__;s__ | 0.92 |
| OTU_1980 | k__Bacteria;p__Actinobacteria;c__unidentified_Actinobacteria;o__Frankiales;f__Cryptosporangiaceae;g__Fodinicola | 0.8 |
| OTU_1987 | k__Bacteria;p__Rokubacteria;c__;o__;f__;g__;s__ | 0.98 |
| OTU_1986 | k__Bacteria;p__Bacteroidetes;c__Bacteroidia;o__Bacteroidales;f__Prevotellaceae;g__unidentified_Prevotellaceae;s__Prevotella_pleuritidis | 0.99 |
| OTU_1985 | k__Archaea;p__Euryarchaeota;c__Methanobacteria;o__Methanobacteriales;f__Methanobacteriaceae;g__Methanobacterium | 1 |
| OTU_1984 | k__Bacteria;p__Proteobacteria;c__Gammaproteobacteria | 0.97 |
| OTU_2322 | k__Bacteria;p__Actinobacteria;c__unidentified_Actinobacteria | 0.97 |
| OTU_2323 | k__Archaea;p__Crenarchaeota;c__;o__;f__;g__;s__ | 1 |
| OTU_2320 | k__Bacteria;p__Actinobacteria;c__unidentified_Actinobacteria;o__Corynebacteriales;f__Nocardiaceae;g__Rhodococcus;s__Rhodococcus_ruber | 1 |
| OTU_2321 | k__Bacteria;p__Firmicutes;c__Clostridia;o__Clostridiales;f__Lachnospiraceae | 1 |
| OTU_2326 | k__Bacteria;p__Bacteroidetes;c__Bacteroidia;o__Flavobacteriales;f__Flavobacteriaceae;g__Gramella;s__ | 0.83 |
| OTU_2327 | k__Bacteria;p__Acidobacteria;c__Acidobacteriia;o__Solibacterales;f__unidentified_Solibacterales;g__Bryobacter;s__ | 0.92 |
| OTU_2324 | k__Bacteria;p__Firmicutes;c__Clostridia;o__Clostridiales;f__Lachnospiraceae;g__Syntrophococcus;s__ | 1 |
| OTU_2325 | k__Bacteria;p__Firmicutes;c__Bacilli;o__Bacillales;f__unidentified_Bacillales;g__Exiguobacterium;s__Exiguobacterium_aurantiacum | 0.86 |
| OTU_2328 | k__Bacteria;p__Acidobacteria;c__Acidobacteriia;o__Acidobacteriales;f__unidentified_Acidobacteriales;g__Terriglobus;s__ | 1 |
| OTU_2329 | k__Bacteria;p__Gemmatimonadetes;c__Longimicrobia;o__Longimicrobiales;f__Longimicrobiaceae;g__;s__ | 0.91 |
| OTU_2164 | k__Bacteria;p__Actinobacteria;c__unidentified_Actinobacteria;o__Propionibacteriales;f__Propionibacteriaceae;g__Haloactinopolyspora;s__ | 0.81 |
| OTU_2137 | k__Bacteria;p__Firmicutes;c__Clostridia;o__Clostridiales;f__Ruminococcaceae;g__Butyricicoccus;s__ | 1 |
| OTU_1768 | k__Bacteria;p__Proteobacteria;c__Gammaproteobacteria;o__Pasteurellales;f__Pasteurellaceae;g__Gallibacterium;s__Gallibacterium_anatis | 1 |
| OTU_1578 | k__Bacteria;p__Proteobacteria;c__Alphaproteobacteria;o__Sphingomonadales;f__Sphingomonadaceae | 1 |
| OTU_2186 | k__Bacteria;p__Firmicutes;c__Clostridia;o__Clostridiales;f__Lachnospiraceae | 1 |
| OTU_2187 | k__Bacteria;p__Planctomycetes;c__Planctomycetacia;o__;f__;g__;s__ | 0.99 |
| OTU_2184 | k__Bacteria;p__Proteobacteria;c__Alphaproteobacteria | 0.98 |
| OTU_2185 | k__Bacteria;p__Actinobacteria;c__unidentified_Actinobacteria | 1 |
| OTU_2182 | k__Bacteria;p__Proteobacteria;c__Deltaproteobacteria;o__;f__;g__;s__ | 0.88 |
| OTU_2183 | k__Bacteria;p__Bacteroidetes;c__Bacteroidia;o__Bacteroidales;f__Tannerellaceae;g__Parabacteroides | 1 |
| OTU_2180 | k__Bacteria;p__Chloroflexi;c__Anaerolineae | 0.96 |
| OTU_2181 | k__Bacteria;p__Actinobacteria;c__unidentified_Actinobacteria;o__Propionibacteriales;f__Nocardioidaceae;g__Nocardioides | 0.99 |
| OTU_2188 | k__Bacteria;p__Proteobacteria;c__Alphaproteobacteria;o__unidentified_Alphaproteobacteria;f__Kiloniellaceae;g__Tagaea;s__ | 0.99 |
| OTU_2189 | k__Bacteria;p__Planctomycetes;c__Planctomycetacia | 1 |
| OTU_2436 | k__Bacteria;p__Bacteroidetes;c__Bacteroidia;o__Chitinophagales;f__Chitinophagaceae | 1 |
| OTU_2437 | k__Bacteria;p__Proteobacteria;c__Gammaproteobacteria;o__unidentified_Gammaproteobacteria;f__unidentified_Gammaproteobacteria;g__Acidibacter | 0.99 |
| OTU_2434 | k__Bacteria;p__Actinobacteria;c__unidentified_Actinobacteria;o__Micrococcales;f__Micrococcaceae;g__Micrococcus | 0.97 |
| OTU_2435 | k__Bacteria;p__Planctomycetes;c__Planctomycetacia;o__unidentified_Planctomycetacia;f__Isosphaeraceae;g__Aquisphaera;s__ | 0.98 |
| OTU_2432 | k__Bacteria;p__Proteobacteria;c__Alphaproteobacteria;o__Rickettsiales;f__unidentified_Rickettsiales;g__unidentified_Rickettsiales;s__ | 0.92 |
| OTU_2433 | k__Bacteria;p__Nitrospirae;c__;o__;f__;g__;s__ | 1 |
| OTU_2430 | k__Bacteria;p__Proteobacteria;c__Alphaproteobacteria;o__Rhizobiales;f__Xanthobacteraceae | 0.98 |
| OTU_2431 | k__Bacteria;p__Firmicutes;c__Clostridia;o__Clostridiales;f__Lachnospiraceae;g__unidentified_Lachnospiraceae;s__Coprococcus_catus | 1 |
| OTU_2438 | k__Bacteria;p__Chloroflexi;c__Anaerolineae;o__Anaerolineales;f__Anaerolineaceae | 1 |
| OTU_2439 | k__Bacteria;p__Cyanobacteria;c__unidentified_Cyanobacteria;o__Nostocales;f__unidentified_Nostocales;g__unidentified_Nostocales;s__Chroococcidiopsis_sp_BB961 | 1 |
| OTU_518 | k__Bacteria;p__Proteobacteria;c__Gammaproteobacteria | 0.96 |
| OTU_519 | k__Bacteria;p__Chloroflexi;c__unidentified_Chloroflexi;o__unidentified_Chloroflexi;f__unidentified_Chloroflexi;g__unidentified_Chloroflexi;s__bacterium_Ellin6519 | 0.87 |
| OTU_2618 | k__Bacteria;p__Proteobacteria;c__Gammaproteobacteria;o__Arenicellales;f__Arenicellaceae;g__Arenicella;s__ | 0.98 |
| OTU_2619 | k__Bacteria;p__Rokubacteria;c__;o__;f__;g__;s__ | 1 |
| OTU_512 | k__Bacteria;p__Firmicutes;c__Negativicutes;o__Selenomonadales;f__Acidaminococcaceae;g__Phascolarctobacterium | 0.99 |
| OTU_513 | k__Bacteria;p__Acidobacteria;c__unidentified_Acidobacteria;o__unidentified_Acidobacteria;f__unidentified_Acidobacteria;g__unidentified_Acidobacteria;s__Acidobacteria_bacterium_RBG_16_70_10 | 1 |
| OTU_510 | k__Bacteria;p__Acidobacteria;c__Acidobacteriia;o__Solibacterales;f__unidentified_Solibacterales;g__Bryobacter;s__ | 1 |
| OTU_511 | k__Bacteria;p__Actinobacteria;c__Thermoleophilia;o__Gaiellales;f__;g__;s__ | 0.91 |
| OTU_516 | Unknown | 0 |
| OTU_517 | k__Bacteria;p__Firmicutes;c__Clostridia;o__Clostridiales;f__Ruminococcaceae;g__Subdoligranulum;s__ | 0.85 |
| OTU_514 | k__Bacteria;p__Bacteroidetes;c__Bacteroidia;o__Flavobacteriales;f__unidentified_Flavobacteriales;g__Chryseobacterium | 1 |
| OTU_515 | k__Bacteria;p__Actinobacteria;c__Thermoleophilia;o__Solirubrobacterales;f__Solirubrobacteraceae | 0.94 |
| OTU_21 | k__Bacteria;p__Firmicutes;c__Clostridia;o__Clostridiales;f__Lachnospiraceae;g__Lachnoclostridium | 1 |
| OTU_20 | k__Bacteria;p__Firmicutes;c__Clostridia;o__Clostridiales;f__Peptostreptococcaceae;g__Peptoclostridium;s__ | 1 |
| OTU_23 | k__Bacteria;p__Firmicutes;c__Bacilli;o__Lactobacillales;f__Lactobacillaceae;g__Lactobacillus | 1 |
| OTU_22 | k__Bacteria;p__Fusobacteria;c__Fusobacteriia;o__Fusobacteriales;f__Fusobacteriaceae;g__Cetobacterium;s__ | 1 |
| OTU_25 | k__Bacteria;p__Firmicutes;c__Clostridia;o__Clostridiales;f__Peptostreptococcaceae;g__Clostridioides;s__Clostridioides_difficile | 1 |
| OTU_24 | k__Bacteria;p__Firmicutes;c__Bacilli;o__Lactobacillales;f__Lactobacillaceae;g__Lactobacillus | 1 |
| OTU_27 | k__Bacteria;p__Actinobacteria;c__unidentified_Actinobacteria;o__Propionibacteriales;f__Propionibacteriaceae;g__Cutibacterium;s__Cutibacterium_acnes | 0.99 |
| OTU_26 | k__Bacteria;p__Proteobacteria;c__Gammaproteobacteria;o__Enterobacteriales;f__Enterobacteriaceae | 1 |
| OTU_29 | k__Bacteria;p__Firmicutes;c__Clostridia;o__Clostridiales;f__unidentified_Clostridiales;g__unidentified_Clostridiales | 1 |
| OTU_28 | k__Bacteria;p__Proteobacteria;c__Gammaproteobacteria;o__unidentified_Gammaproteobacteria;f__Coxiellaceae;g__Coxiella;s__ | 0.93 |
| OTU_3053 | k__Bacteria;p__Chloroflexi;c__Anaerolineae;o__;f__;g__;s__ | 0.93 |
| OTU_3052 | k__Bacteria;p__Proteobacteria;c__Alphaproteobacteria;o__Rhizobiales;f__Xanthobacteraceae;g__Bradyrhizobium | 0.88 |
| OTU_3051 | k__Bacteria;p__Acidobacteria;c__Acidobacteriia;o__Solibacterales;f__unidentified_Solibacterales;g__Bryobacter;s__Acidobacteria_bacterium_IGE-015 | 1 |
| OTU_3050 | k__Bacteria;p__Firmicutes;c__Bacilli;o__Lactobacillales;f__Streptococcaceae;g__;s__ | 1 |
| OTU_3057 | k__Bacteria | 1 |
| OTU_3056 | k__Bacteria;p__Firmicutes;c__Negativicutes;o__Selenomonadales;f__Veillonellaceae;g__Megamonas;s__ | 1 |
| OTU_3055 | k__Bacteria;p__Proteobacteria;c__Gammaproteobacteria;o__Xanthomonadales;f__Xanthomonadaceae;g__Lysobacter;s__Lysobacter_sp_RHLT3-4 | 0.92 |
| OTU_3054 | k__Bacteria;p__Proteobacteria;c__Gammaproteobacteria;o__Oceanospirillales;f__unidentified_Oceanospirillales;g__Pseudohongiella;s__ | 0.98 |
| OTU_2050 | k__Bacteria;p__Proteobacteria;c__Gammaproteobacteria;o__unidentified_Gammaproteobacteria;f__Burkholderiaceae;g__Sutterella;s__Sutturella_timonensis | 0.99 |
| OTU_2503 | k__Bacteria;p__Planctomycetes;c__Planctomycetacia;o__unidentified_Planctomycetacia;f__unidentified_Planctomycetacia;g__Pirellula;s__ | 1 |
| OTU_2500 | k__Bacteria | 1 |
| OTU_3058 | k__Bacteria;p__Proteobacteria;c__Alphaproteobacteria;o__Sphingomonadales;f__Sphingomonadaceae;g__Sphingomonas;s__Sphingomonas_sp_LRR22 | 0.98 |
| OTU_2506 | k__Bacteria;p__Bacteroidetes;c__Ignavibacteria;o__;f__;g__;s__ | 0.98 |
| OTU_2055 | k__Bacteria | 0.98 |
| OTU_2504 | k__Bacteria;p__Actinobacteria;c__Acidimicrobiia;o__;f__;g__;s__ | 0.94 |
| OTU_2505 | k__Bacteria;p__Firmicutes;c__Bacilli;o__Bacillales;f__Paenibacillaceae;g__Paenibacillus | 0.98 |
| OTU_1569 | k__Bacteria;p__Firmicutes;c__Clostridia;o__Clostridiales;f__Lachnospiraceae | 1 |
| OTU_1568 | k__Bacteria;p__unidentified_Bacteria;c__unidentified_Bacteria;o__Campylobacterales;f__Helicobacteraceae;g__Helicobacter | 1 |
| OTU_604 | k__Bacteria;p__Actinobacteria;c__Acidimicrobiia;o__unidentified_Acidimicrobiia;f__Iamiaceae;g__Iamia;s__Aquihabitans_daechungensis | 0.89 |
| OTU_605 | k__Bacteria;p__Bacteroidetes;c__Bacteroidia;o__Bacteroidales;f__Bacteroidaceae;g__Bacteroides | 1 |
| OTU_602 | k__Bacteria;p__Proteobacteria;c__Alphaproteobacteria;o__Rickettsiales;f__unidentified_Rickettsiales;g__unidentified_Rickettsiales;s__ | 0.94 |
| OTU_603 | k__Bacteria;p__Firmicutes;c__Erysipelotrichia;o__Erysipelotrichales;f__Erysipelotrichaceae | 0.93 |
| OTU_600 | k__Bacteria;p__Proteobacteria;c__Alphaproteobacteria;o__Rhizobiales;f__Xanthobacteraceae;g__Pseudolabrys;s__ | 0.93 |
| OTU_601 | k__Bacteria;p__Proteobacteria;c__Gammaproteobacteria;o__unidentified_Gammaproteobacteria;f__Methylophilaceae;g__Methylobacillus;s__ | 1 |
| OTU_1561 | k__Bacteria;p__unidentified_Bacteria;c__unidentified_Bacteria;o__unidentified_Bacteria;f__unidentified_Bacteria;g__unidentified_Bacteria | 0.99 |
| OTU_1560 | k__Bacteria;p__Firmicutes;c__Clostridia;o__Clostridiales;f__Peptococcaceae;g__Peptococcus;s__Peptococcus_sp_oral_clone_MCE10_265 | 0.99 |
| OTU_1563 | k__Bacteria;p__Proteobacteria;c__Alphaproteobacteria;o__unidentified_Alphaproteobacteria;f__Acetobacteraceae | 1 |
| OTU_1562 | k__Bacteria;p__Bacteroidetes;c__Bacteroidia;o__Bacteroidales;f__Bacteroidaceae;g__Bacteroides;s__Bacteroides_gallinaceum | 1 |
| OTU_1565 | k__Bacteria;p__Firmicutes;c__Clostridia;o__Clostridiales;f__Ruminococcaceae;g__Caproiciproducens;s__ | 1 |
| OTU_1564 | k__Bacteria;p__Firmicutes;c__Clostridia;o__Clostridiales;f__unidentified_Clostridiales;g__unidentified_Clostridiales | 0.84 |
| OTU_608 | k__Bacteria;p__Firmicutes;c__Bacilli;o__Bacillales;f__;g__;s__ | 1 |
| OTU_609 | k__Bacteria;p__Proteobacteria;c__Gammaproteobacteria;o__unidentified_Gammaproteobacteria;f__unidentified_Gammaproteobacteria;g__unidentified_Gammaproteobacteria | 0.95 |
| OTU_288 | k__Bacteria;p__Deferribacteres;c__unidentified_Deferribacteres;o__Deferribacterales;f__Deferribacteraceae;g__Mucispirillum | 1 |
| OTU_289 | k__Bacteria;p__Proteobacteria;c__Alphaproteobacteria;o__Sphingomonadales;f__Sphingomonadaceae;g__Altererythrobacter;s__ | 0.83 |
| OTU_282 | k__Bacteria;p__Bacteroidetes;c__Bacteroidia;o__Flavobacteriales;f__Flavobacteriaceae | 1 |
| OTU_283 | k__Bacteria;p__Actinobacteria;c__unidentified_Actinobacteria;o__Frankiales;f__Acidothermaceae;g__Acidothermus;s__ | 0.99 |
| OTU_280 | k__Bacteria;p__Proteobacteria;c__Gammaproteobacteria;o__unidentified_Gammaproteobacteria;f__Burkholderiaceae;g__Massilia | 0.99 |
| OTU_281 | k__Bacteria;p__Proteobacteria;c__Alphaproteobacteria;o__Rhizobiales;f__Beijerinckiaceae;g__Microvirga;s__ | 0.83 |
| OTU_286 | k__Bacteria;p__Actinobacteria;c__unidentified_Actinobacteria;o__unidentified_Actinobacteria;f__unidentified_Actinobacteria;g__unidentified_Actinobacteria;s__bacterium_rJ7 | 0.98 |
| OTU_287 | k__Bacteria;p__Chloroflexi;c__Ktedonobacteria;o__Ktedonobacterales;f__Ktedonobacteraceae;g__;s__ | 0.82 |
| OTU_284 | k__Bacteria;p__Acidobacteria;c__unidentified_Acidobacteria;o__unidentified_Acidobacteria;f__unidentified_Acidobacteria;g__Stenotrophobacter;s__ | 0.89 |
| OTU_285 | k__Bacteria;p__Proteobacteria;c__Gammaproteobacteria;o__Cellvibrionales;f__Cellvibrionaceae;g__Cellvibrio;s__ | 1 |
| OTU_462 | k__Bacteria;p__Bacteroidetes;c__Bacteroidia;o__Flavobacteriales;f__unidentified_Flavobacteriales;g__Chryseobacterium | 1 |
| OTU_463 | k__Bacteria;p__Firmicutes;c__Clostridia;o__Clostridiales;f__Lachnospiraceae;g__Anaerostipes;s__Anaerostipes_caccae | 1 |
| OTU_460 | k__Bacteria;p__unidentified_Bacteria;c__unidentified_Bacteria;o__Campylobacterales;f__Campylobacteraceae;g__Campylobacter;s__Campylobacter_concisus | 0.98 |
| OTU_461 | k__Bacteria;p__Actinobacteria;c__unidentified_Actinobacteria;o__Micrococcales;f__Micrococcaceae;g__Rothia;s__Rothia_nasimurium | 0.99 |
| OTU_466 | k__Bacteria;p__Proteobacteria;c__Alphaproteobacteria;o__unidentified_Alphaproteobacteria;f__unidentified_Alphaproteobacteria;g__Reyranella;s__ | 0.99 |
| OTU_467 | k__Bacteria;p__Firmicutes;c__Bacilli;o__Lactobacillales;f__Lactobacillaceae;g__Pediococcus;s__Pediococcus_pentosaceus | 1 |
| OTU_464 | k__Bacteria;p__Firmicutes;c__Clostridia;o__Clostridiales;f__unidentified_Clostridiales;g__Tissierella;s__ | 0.91 |
| OTU_1698 | k__Bacteria;p__Planctomycetes;c__Planctomycetacia;o__unidentified_Planctomycetacia;f__Isosphaeraceae | 1 |
| OTU_1697 | k__Bacteria;p__Proteobacteria;c__Gammaproteobacteria;o__unidentified_Gammaproteobacteria | 0.85 |
| OTU_1696 | k__Bacteria;p__Bacteroidetes;c__Bacteroidia;o__Chitinophagales;f__Chitinophagaceae | 1 |
| OTU_1695 | k__Bacteria;p__Chloroflexi | 0.8 |
| OTU_1694 | k__Bacteria;p__Acidobacteria;c__unidentified_Acidobacteria;o__unidentified_Acidobacteria;f__unidentified_Acidobacteria | 0.89 |
| OTU_1693 | k__Bacteria;p__Chloroflexi;c__Chloroflexia;o__Thermomicrobiales;f__;g__;s__ | 1 |
| OTU_1692 | k__Bacteria;p__Firmicutes;c__Clostridia;o__Clostridiales;f__Heliobacteriaceae;g__Hydrogenispora | 0.96 |
| OTU_1691 | k__Bacteria;p__Bacteroidetes;c__Bacteroidia;o__Flavobacteriales;f__Flavobacteriaceae;g__Winogradskyella | 0.83 |
| OTU_1690 | k__Bacteria;p__Actinobacteria;c__Thermoleophilia;o__Gaiellales;f__unidentified_Gaiellales;g__unidentified_Gaiellales;s__bacterium_Ellin6510 | 0.85 |
| OTU_264 | k__Bacteria;p__Actinobacteria;c__Acidimicrobiia;o__;f__;g__;s__ | 1 |
| OTU_265 | k__Bacteria;p__Actinobacteria;c__Coriobacteriia;o__Coriobacteriales;f__Coriobacteriaceae;g__Collinsella | 0.98 |
| OTU_266 | k__Bacteria;p__Actinobacteria;c__unidentified_Actinobacteria;o__Frankiales;f__Acidothermaceae;g__Acidothermus;s__Thermomonosporaceae_bacterium_YE4-D4-16-CH2 | 0.83 |
| OTU_267 | k__Bacteria;p__Bacteroidetes;c__Bacteroidia;o__Bacteroidales;f__Bacteroidaceae;g__Bacteroides | 1 |
| OTU_260 | k__Bacteria;p__Firmicutes;c__Bacilli;o__Bacillales;f__unidentified_Bacillales;g__Gemella;s__ | 1 |
| OTU_261 | k__Bacteria;p__Proteobacteria;c__Gammaproteobacteria;o__Enterobacteriales;f__Enterobacteriaceae | 1 |
| OTU_262 | k__Bacteria;p__Proteobacteria;c__Deltaproteobacteria;o__Oligoflexales;f__unidentified_Oligoflexales;g__unidentified_Oligoflexales;s__bacterium_enrichment_culture_clone_auto112_4W | 0.99 |
| OTU_263 | k__Bacteria;p__Actinobacteria;c__unidentified_Actinobacteria;o__Frankiales;f__Acidothermaceae;g__Acidothermus;s__ | 0.95 |
| OTU_268 | k__Bacteria;p__Actinobacteria;c__unidentified_Actinobacteria;o__Micrococcales;f__Microbacteriaceae | 1 |
| OTU_269 | k__Bacteria;p__Bacteroidetes;c__Bacteroidia;o__Bacteroidales;f__Prevotellaceae;g__Prevotella;s__Prevotella_oris | 1 |
| OTU_1438 | k__Bacteria;p__Proteobacteria;c__Alphaproteobacteria;o__Caulobacterales;f__Hyphomonadaceae;g__Hirschia;s__ | 0.89 |
| OTU_1183 | k__Bacteria;p__Proteobacteria;c__Gammaproteobacteria | 0.92 |
| OTU_1182 | k__Bacteria;p__Actinobacteria;c__unidentified_Actinobacteria;o__Micrococcales;f__Microbacteriaceae;g__Candidatus_Aquiluna;s__ | 0.97 |
| OTU_1181 | k__Bacteria;p__Bacteroidetes;c__Bacteroidia;o__Bacteroidales;f__Muribaculaceae;g__;s__ | 0.98 |
| OTU_1180 | k__Bacteria;p__Proteobacteria;c__Deltaproteobacteria;o__Desulfuromonadales;f__Geobacteraceae;g__Geobacter | 0.95 |
| OTU_1187 | k__Bacteria;p__Bacteroidetes;c__Bacteroidia;o__Sphingobacteriales;f__Sphingobacteriaceae;g__Sphingobacterium;s__Sphingobacterium_multivorum | 1 |
| OTU_1186 | k__Bacteria;p__Firmicutes;c__Clostridia;o__Clostridiales;f__unidentified_Clostridiales;g__unidentified_Clostridiales | 0.99 |
| OTU_1185 | k__Bacteria;p__Firmicutes;c__Bacilli;o__Bacillales;f__Paenibacillaceae;g__Paenibacillus | 0.93 |
| OTU_1184 | k__Bacteria;p__Firmicutes;c__Clostridia;o__Clostridiales;f__Peptococcaceae;g__Desulfosporosinus;s__ | 0.99 |
| OTU_1189 | k__Archaea;p__Euryarchaeota;c__Thermoplasmata;o__;f__;g__;s__ | 0.99 |
| OTU_1188 | k__Bacteria;p__Proteobacteria;c__Gammaproteobacteria;o__Methylococcales;f__unidentified_Methylococcales;g__Cycloclasticus;s__ | 0.85 |
| OTU_1741 | k__Bacteria;p__unidentified_Bacteria;c__unidentified_Bacteria;o__unidentified_Bacteria;f__unidentified_Bacteria;g__unidentified_Bacteria | 1 |
| OTU_1740 | k__Bacteria;p__Firmicutes;c__Clostridia;o__Clostridiales;f__Ruminococcaceae | 0.97 |
| OTU_1743 | k__Bacteria;p__Planctomycetes;c__Planctomycetacia;o__;f__;g__;s__ | 0.98 |
| OTU_1742 | k__Bacteria;p__Bacteroidetes;c__Bacteroidia;o__Cytophagales;f__Cyclobacteriaceae;g__Ekhidna;s__ | 0.97 |
| OTU_1745 | k__Bacteria | 1 |
| OTU_1744 | k__Bacteria;p__Verrucomicrobia;c__Verrucomicrobiae;o__;f__;g__;s__ | 1 |
| OTU_868 | k__Bacteria;p__Acidobacteria;c__Acidobacteriia;o__;f__;g__;s__ | 1 |
| OTU_1746 | k__Bacteria;p__Actinobacteria;c__Acidimicrobiia;o__Actinomarinales;f__Actinomarinaceae;g__Candidatus_Actinomarina;s__actinobacterium_SCGC_AAA015-M09 | 0.83 |
| OTU_866 | k__Bacteria;p__Firmicutes;c__Bacilli;o__Lactobacillales;f__Leuconostocaceae;g__Leuconostoc;s__Leuconostoc_mesenteroides | 0.99 |
| OTU_867 | k__Bacteria;p__Firmicutes;c__Clostridia;o__Clostridiales;f__Lachnospiraceae;g__Blautia;s__ | 0.84 |
| OTU_864 | k__Bacteria;p__Firmicutes;c__Clostridia;o__Clostridiales;f__Lachnospiraceae | 1 |
| OTU_865 | k__Bacteria;p__Bacteroidetes;c__Bacteroidia;o__Chitinophagales;f__Chitinophagaceae | 1 |
| OTU_862 | k__Bacteria;p__Proteobacteria;c__Gammaproteobacteria;o__Pseudomonadales;f__Pseudomonadaceae;g__Pseudomonas | 0.95 |
| OTU_863 | k__Bacteria;p__Firmicutes;c__Clostridia;o__Clostridiales;f__Ruminococcaceae | 0.86 |
| OTU_860 | k__Bacteria;p__Actinobacteria;c__Acidimicrobiia;o__unidentified_Acidimicrobiia;f__unidentified_Acidimicrobiia;g__unidentified_Acidimicrobiia;s__actinobacterium_BGR_88 | 1 |
| OTU_861 | k__Bacteria;p__Actinobacteria;c__Thermoleophilia;o__Gaiellales;f__;g__;s__ | 0.85 |
| OTU_2507 | k__Bacteria;p__Firmicutes;c__Bacilli;o__Bacillales | 1 |
| OTU_1530 | k__Bacteria;p__Proteobacteria;c__Alphaproteobacteria;o__Micropepsales;f__Micropepsaceae;g__;s__ | 1 |
| OTU_1531 | k__Bacteria;p__Actinobacteria | 0.98 |
| OTU_659 | k__Bacteria;p__Proteobacteria;c__Alphaproteobacteria;o__Sphingomonadales;f__Sphingomonadaceae;g__Altererythrobacter | 0.88 |
| OTU_658 | k__Bacteria;p__Firmicutes;c__Clostridia;o__Clostridiales;f__unidentified_Clostridiales;g__unidentified_Clostridiales;s__Desnuesiella_massiliensis | 0.8 |
| OTU_129 | k__Bacteria;p__Proteobacteria;c__Alphaproteobacteria;o__Rhodobacterales;f__Rhodobacteraceae | 0.94 |
| OTU_2988 | k__Bacteria;p__Firmicutes;c__Clostridia;o__Clostridiales;f__Lachnospiraceae;g__Marvinbryantia | 0.93 |
| OTU_2989 | k__Bacteria;p__Bacteroidetes;c__Bacteroidia;o__Bacteroidales;f__;g__;s__ | 0.98 |
| OTU_2986 | k__Bacteria;p__Bacteroidetes;c__Bacteroidia;o__Bacteroidales;f__Muribaculaceae;g__;s__ | 1 |
| OTU_2987 | k__Bacteria;p__Firmicutes;c__Bacilli;o__Lactobacillales;f__Enterococcaceae;g__Tetragenococcus | 0.85 |
| OTU_2984 | k__Bacteria;p__Bacteroidetes;c__Bacteroidia;o__Chitinophagales | 0.95 |
| OTU_2985 | k__Bacteria;p__Atribacteria | 0.99 |
| OTU_2982 | k__Bacteria;p__Proteobacteria;c__Deltaproteobacteria;o__Desulfarculales;f__Desulfarculaceae | 0.95 |
| OTU_2983 | k__Bacteria;p__Chloroflexi;c__;o__;f__;g__;s__ | 1 |
| OTU_2980 | k__Bacteria;p__Bacteroidetes;c__Bacteroidia;o__Bacteroidales | 0.98 |
| OTU_2981 | k__Bacteria;p__Bacteroidetes;c__Bacteroidia;o__Bacteroidales | 1 |
| OTU_127 | k__Bacteria;p__Firmicutes;c__Clostridia;o__Clostridiales;f__unidentified_Clostridiales;g__unidentified_Clostridiales;s__Clostridium_colicanis | 1 |
| OTU_126 | k__Bacteria;p__Proteobacteria;c__Alphaproteobacteria;o__Sphingomonadales;f__Sphingomonadaceae | 1 |
| OTU_125 | k__Bacteria;p__Cyanobacteria;c__unidentified_Cyanobacteria;o__Synechococcales | 1 |
| OTU_844 | k__Bacteria;p__Verrucomicrobia;c__Verrucomicrobiae;o__Chthoniobacterales;f__Chthoniobacteraceae;g__Chthoniobacter | 1 |
| OTU_124 | k__Bacteria;p__Bacteroidetes;c__Bacteroidia;o__Bacteroidales;f__Bacteroidaceae;g__Bacteroides;s__Bacteroides_stercoris | 0.98 |
| OTU_845 | k__Bacteria;p__Firmicutes;c__Clostridia;o__Clostridiales;f__Ruminococcaceae;g__Oscillibacter;s__[Clostridium]_leptum | 0.82 |
| OTU_651 | k__Bacteria;p__Actinobacteria;c__unidentified_Actinobacteria;o__Micrococcales;f__Micrococcaceae;g__Kocuria | 1 |
| OTU_969 | k__Bacteria;p__Proteobacteria;c__Alphaproteobacteria;o__unidentified_Alphaproteobacteria;f__Geminicoccaceae;g__;s__ | 0.98 |
| OTU_122 | k__Bacteria;p__Proteobacteria;c__Gammaproteobacteria;o__Cellvibrionales;f__Halieaceae;g__;s__ | 0.92 |
| OTU_1352 | k__Bacteria;p__Firmicutes;c__Bacilli;o__Bacillales | 1 |
| OTU_1353 | k__Bacteria;p__Actinobacteria;c__unidentified_Actinobacteria;o__Corynebacteriales;f__Corynebacteriaceae;g__Corynebacterium;s__Corynebacterium_glucuronolyticum | 1 |
| OTU_1350 | k__Bacteria;p__Proteobacteria;c__Alphaproteobacteria;o__Rhizobiales;f__unidentified_Rhizobiales;g__Nordella;s__Nordella_oligomobilis | 0.83 |
| OTU_1351 | k__Bacteria;p__Proteobacteria;c__Alphaproteobacteria;o__unidentified_Alphaproteobacteria;f__Acetobacteraceae | 1 |
| OTU_1356 | k__Bacteria;p__Fusobacteria;c__Fusobacteriia;o__Fusobacteriales;f__Fusobacteriaceae;g__Fusobacterium | 1 |
| OTU_1357 | k__Bacteria;p__Actinobacteria;c__Acidimicrobiia;o__unidentified_Acidimicrobiia;f__unidentified_Acidimicrobiia;g__unidentified_Acidimicrobiia;s__Actinobacteria_bacterium_IMCC26256 | 1 |
| OTU_1354 | k__Bacteria;p__Proteobacteria;c__Deltaproteobacteria;o__Desulfuromonadales;f__Geobacteraceae;g__Geobacter | 1 |
| OTU_1355 | k__Bacteria;p__Proteobacteria;c__Alphaproteobacteria;o__Rickettsiales;f__unidentified_Rickettsiales;g__unidentified_Rickettsiales;s__ | 1 |
| OTU_840 | k__Archaea;p__Euryarchaeota;c__Methanococci;o__Methanococcales;f__Methanococcaceae;g__Methanococcus;s__Methanococcus_maripaludis | 0.99 |
| OTU_1358 | k__Bacteria;p__Proteobacteria;c__Alphaproteobacteria;o__Rhodobacterales;f__Rhodobacteraceae | 0.98 |
| OTU_1359 | k__Bacteria;p__Bacteroidetes;c__Bacteroidia;o__Bacteroidales;f__Tannerellaceae;g__Macellibacteroides;s__ | 0.98 |
| OTU_841 | k__Bacteria;p__Proteobacteria;c__Alphaproteobacteria;o__unidentified_Alphaproteobacteria;f__Acetobacteraceae | 1 |
| OTU_842 | k__Bacteria;p__Proteobacteria;c__Gammaproteobacteria;o__Pseudomonadales;f__Pseudomonadaceae;g__Pseudomonas;s__Pseudomonas_orientalis | 0.87 |
| OTU_843 | k__Bacteria;p__Bacteroidetes;c__Bacteroidia;o__Flavobacteriales;f__Flavobacteriaceae;g__Flavobacterium;s__Flavobacterium_lacus | 0.98 |
| OTU_1760 | k__Bacteria;p__Firmicutes;c__Clostridia;o__Clostridiales;f__Lachnospiraceae | 1 |
| OTU_967 | k__Bacteria;p__Proteobacteria;c__Alphaproteobacteria;o__unidentified_Alphaproteobacteria;f__Acetobacteraceae | 1 |
| OTU_966 | k__Bacteria;p__Proteobacteria;c__Deltaproteobacteria;o__Oligoflexales | 0.94 |
| OTU_1226 | k__Bacteria;p__Bacteroidetes;c__Bacteroidia;o__Cytophagales;f__Spirosomaceae;g__Persicitalea;s__ | 0.9 |
| OTU_1227 | k__Bacteria;p__Firmicutes;c__Clostridia;o__Clostridiales;f__unidentified_Clostridiales;g__unidentified_Clostridiales | 1 |
| OTU_1224 | k__Bacteria;p__Proteobacteria;c__Deltaproteobacteria;o__;f__;g__;s__ | 0.99 |
| OTU_1225 | k__Bacteria;p__Actinobacteria;c__unidentified_Actinobacteria;o__Corynebacteriales;f__Mycobacteriaceae;g__Mycobacterium | 1 |
| OTU_1222 | k__Bacteria;p__Bacteroidetes;c__Bacteroidia;o__Flavobacteriales;f__Flavobacteriaceae;g__Gillisia;s__ | 1 |
| OTU_1223 | k__Bacteria;p__Proteobacteria;c__Gammaproteobacteria;o__Pseudomonadales;f__Moraxellaceae;g__Alkanindiges;s__ | 0.96 |
| OTU_1220 | k__Bacteria;p__Proteobacteria;c__Gammaproteobacteria;o__unidentified_Gammaproteobacteria;f__unidentified_Gammaproteobacteria;g__unidentified_Gammaproteobacteria;s__SAR86_cluster_bacterium_REDSEA-S09_B4 | 0.95 |
| OTU_1221 | k__Bacteria;p__Firmicutes;c__Negativicutes;o__Selenomonadales;f__Veillonellaceae;g__Veillonella;s__Veillonella_ratti | 1 |
| OTU_1228 | k__Bacteria;p__Firmicutes;c__Bacilli;o__Bacillales;f__Pasteuriaceae;g__Pasteuria | 1 |
| OTU_1229 | k__Bacteria;p__Proteobacteria;c__Alphaproteobacteria;o__Caulobacterales;f__Hyphomonadaceae;g__Hyphobacterium;s__ | 1 |
| OTU_2335 | k__Bacteria;p__Actinobacteria;c__unidentified_Actinobacteria;o__Micromonosporales;f__Micromonosporaceae | 0.98 |
| OTU_2334 | k__Bacteria;p__Proteobacteria;c__Alphaproteobacteria;o__Sphingomonadales;f__Sphingomonadaceae;g__Sphingobium | 0.99 |
| OTU_2337 | k__Bacteria;p__Firmicutes;c__Clostridia;o__Clostridiales;f__Ruminococcaceae | 0.99 |
| OTU_2336 | k__Bacteria;p__Bacteroidetes;c__Bacteroidia;o__Bacteroidales;f__Rikenellaceae;g__;s__ | 0.99 |
| OTU_2331 | k__Bacteria;p__Chloroflexi;c__Ktedonobacteria;o__Ktedonobacterales;f__Ktedonobacteraceae;g__;s__ | 0.99 |
| OTU_2330 | k__Bacteria;p__Proteobacteria;c__Alphaproteobacteria;o__Rickettsiales;f__;g__;s__ | 0.88 |
| OTU_2333 | k__Bacteria;p__Proteobacteria | 0.99 |
| OTU_2332 | k__Bacteria;p__Firmicutes;c__Bacilli;o__Lactobacillales;f__Streptococcaceae;g__Streptococcus;s__Streptococcus_canis | 0.91 |
| OTU_2339 | k__Bacteria;p__Proteobacteria;c__Gammaproteobacteria;o__unidentified_Gammaproteobacteria;f__Nitrosomonadaceae;g__;s__ | 0.91 |
| OTU_2338 | k__Bacteria;p__Firmicutes;c__Clostridia;o__Clostridiales | 0.96 |
| OTU_2199 | k__Bacteria;p__Gemmatimonadetes;c__unidentified_Gemmatimonadetes;o__Gemmatimonadales;f__Gemmatimonadaceae;g__;s__ | 1 |
| OTU_2198 | k__Bacteria;p__Verrucomicrobia;c__Verrucomicrobiae | 0.98 |
| OTU_2191 | k__Bacteria;p__Bacteroidetes;c__Bacteroidia;o__Bacteroidales | 0.91 |
| OTU_2190 | k__Bacteria;p__Firmicutes;c__Clostridia;o__Clostridiales;f__Christensenellaceae | 1 |
| OTU_2193 | k__Bacteria;p__Cyanobacteria;c__unidentified_Cyanobacteria;o__unidentified_Cyanobacteria;f__unidentified_Cyanobacteria;g__unidentified_Cyanobacteria | 0.93 |
| OTU_2192 | k__Bacteria;p__Actinobacteria;c__Coriobacteriia;o__Coriobacteriales | 1 |
| OTU_2195 | k__Bacteria;p__Proteobacteria;c__Alphaproteobacteria;o__Rickettsiales;f__unidentified_Rickettsiales;g__unidentified_Rickettsiales;s__ | 0.93 |
| OTU_2194 | k__Bacteria;p__unidentified_Bacteria;c__unidentified_Bacteria;o__unidentified_Bacteria;f__unidentified_Bacteria;g__unidentified_Bacteria;s__soil_bacterium_WF55 | 0.81 |
| OTU_2197 | k__Bacteria;p__Proteobacteria;c__Deltaproteobacteria;o__Myxococcales | 0.9 |
| OTU_2196 | k__Bacteria;p__Chloroflexi;c__Anaerolineae;o__Anaerolineales;f__Anaerolineaceae;g__Leptolinea | 0.97 |
| OTU_2429 | k__Bacteria;p__Gemmatimonadetes;c__unidentified_Gemmatimonadetes;o__Gemmatimonadales;f__Gemmatimonadaceae;g__;s__ | 1 |
| OTU_2428 | k__Bacteria;p__Gemmatimonadetes;c__unidentified_Gemmatimonadetes;o__Gemmatimonadales;f__Gemmatimonadaceae;g__;s__ | 1 |
| OTU_548 | k__Bacteria;p__Firmicutes;c__Clostridia;o__Clostridiales;f__Peptostreptococcaceae;g__Peptostreptococcus;s__ | 0.83 |
| OTU_2781 | k__Bacteria;p__Proteobacteria;c__Gammaproteobacteria;o__Enterobacteriales;f__Enterobacteriaceae | 0.99 |
| OTU_2421 | k__Bacteria;p__Firmicutes;c__Clostridia;o__Clostridiales;f__Lachnospiraceae | 1 |
| OTU_2420 | k__Bacteria;p__Proteobacteria;c__Alphaproteobacteria;o__Rhodobacterales;f__Rhodobacteraceae;g__Sulfitobacter | 0.86 |
| OTU_2423 | k__Bacteria;p__Bacteroidetes;c__Bacteroidia;o__Sphingobacteriales;f__;g__;s__ | 0.97 |
| OTU_2422 | k__Bacteria | 0.98 |
| OTU_2425 | k__Bacteria;p__Firmicutes;c__Bacilli;o__Lactobacillales;f__Lactobacillaceae;g__Lactobacillus | 0.97 |
| OTU_2782 | k__Bacteria;p__Chloroflexi;c__Anaerolineae;o__Anaerolineales;f__Anaerolineaceae | 0.87 |
| OTU_2427 | k__Bacteria;p__Acidobacteria;c__unidentified_Acidobacteria;o__unidentified_Acidobacteria;f__unidentified_Acidobacteria;g__unidentified_Acidobacteria | 0.98 |
| OTU_2426 | k__Bacteria;p__Verrucomicrobia;c__Verrucomicrobiae;o__;f__;g__;s__ | 0.98 |
| OTU_2783 | k__Bacteria;p__Firmicutes;c__Clostridia;o__Clostridiales;f__Lachnospiraceae;g__Roseburia;s__ | 0.88 |
| OTU_2784 | k__Bacteria;p__Proteobacteria;c__Gammaproteobacteria | 0.97 |
| OTU_2785 | k__Bacteria;p__Bacteroidetes;c__Bacteroidia;o__Flavobacteriales;f__unidentified_Flavobacteriales;g__Bergeyella;s__ | 1 |
| OTU_2601 | k__Bacteria;p__Proteobacteria;c__Gammaproteobacteria;o__unidentified_Gammaproteobacteria | 0.83 |
| OTU_2600 | k__Bacteria;p__Gemmatimonadetes;c__unidentified_Gemmatimonadetes;o__Gemmatimonadales;f__Gemmatimonadaceae;g__Gemmatimonas;s__ | 0.99 |
| OTU_2603 | k__Bacteria;p__Chloroflexi;c__Chloroflexia;o__Chloroflexales;f__Chloroflexaceae;g__;s__ | 0.99 |
| OTU_2602 | k__Bacteria;p__Firmicutes;c__Bacilli;o__Bacillales;f__Bacillaceae;g__Bacillus;s__Bacillus_decolorationis | 0.99 |
| OTU_2605 | k__Bacteria;p__Chloroflexi;c__;o__;f__;g__;s__ | 1 |
| OTU_2604 | k__Bacteria;p__Cyanobacteria;c__unidentified_Cyanobacteria;o__unidentified_Cyanobacteria;f__unidentified_Cyanobacteria;g__unidentified_Cyanobacteria;s__Cercis_gigantea | 0.89 |
| OTU_2607 | k__Bacteria;p__Fusobacteria;c__Fusobacteriia;o__Fusobacteriales;f__Fusobacteriaceae;g__Fusobacterium | 0.96 |
| OTU_2606 | k__Bacteria;p__Acidobacteria;c__unidentified_Acidobacteria;o__unidentified_Acidobacteria;f__unidentified_Acidobacteria;g__unidentified_Acidobacteria;s__Aminicenantes_bacterium_clone_OPB95 | 1 |
| OTU_2609 | k__Bacteria;p__Proteobacteria;c__Gammaproteobacteria;o__unidentified_Gammaproteobacteria;f__Competibacteraceae;g__Candidatus_Competibacter;s__ | 0.96 |
| OTU_2608 | k__Bacteria;p__Chloroflexi;c__;o__;f__;g__;s__ | 0.97 |
| OTU_2787 | k__Bacteria;p__Proteobacteria;c__Alphaproteobacteria;o__unidentified_Alphaproteobacteria;f__Acetobacteraceae | 1 |
| OTU_152 | k__Bacteria;p__Deinococcus-Thermus;c__Deinococci;o__Deinococcales;f__Deinococcaceae;g__Deinococcus;s__Deinococcus_sp_Lab-1 | 0.88 |
| OTU_2789 | k__Bacteria;p__Firmicutes;c__Bacilli;o__Bacillales;f__Bacillaceae | 0.8 |
| OTU_150 | k__Bacteria;p__Actinobacteria;c__unidentified_Actinobacteria;o__Propionibacteriales;f__Nocardioidaceae;g__Nocardioides | 1 |
| OTU_151 | k__Bacteria;p__Actinobacteria;c__Coriobacteriia;o__Coriobacteriales;f__Coriobacteriaceae;g__Collinsella | 0.99 |
| OTU_18 | k__Bacteria;p__Cyanobacteria;c__unidentified_Cyanobacteria;o__unidentified_Cyanobacteria;f__unidentified_Cyanobacteria;g__unidentified_Cyanobacteria;s__Bambusa_oldhamii | 1 |
| OTU_19 | k__Bacteria;p__Proteobacteria;c__Alphaproteobacteria;o__Rhizobiales;f__Xanthobacteraceae;g__Bradyrhizobium;s__Bradyrhizobium_elkanii | 0.98 |
| OTU_14 | k__Bacteria;p__Bacteroidetes;c__Bacteroidia;o__Bacteroidales;f__Bacteroidaceae;g__Bacteroides;s__Bacteroides_fragilis | 1 |
| OTU_15 | k__Bacteria;p__Fusobacteria;c__Fusobacteriia;o__Fusobacteriales;f__Fusobacteriaceae;g__Fusobacterium | 0.87 |
| OTU_16 | k__Bacteria;p__Firmicutes;c__Bacilli;o__Lactobacillales;f__Streptococcaceae;g__Streptococcus | 0.98 |
| OTU_17 | k__Bacteria;p__Proteobacteria;c__Gammaproteobacteria;o__Alteromonadales;f__Pseudoalteromonadaceae;g__Pseudoalteromonas | 1 |
| OTU_10 | k__Bacteria;p__Firmicutes;c__Clostridia;o__Clostridiales;f__Lachnospiraceae;g__unidentified_Lachnospiraceae;s__[Ruminococcus]_gnavus | 1 |
| OTU_11 | k__Bacteria;p__Actinobacteria;c__Coriobacteriia;o__Coriobacteriales;f__Coriobacteriaceae;g__Collinsella | 0.99 |
| OTU_12 | k__Bacteria;p__Bacteroidetes;c__Bacteroidia;o__Bacteroidales;f__Bacteroidaceae;g__Bacteroides | 1 |
| OTU_13 | k__Bacteria;p__Firmicutes;c__Bacilli;o__Lactobacillales;f__Enterococcaceae;g__Enterococcus;s__Enterococcus_durans | 0.86 |
| OTU_200 | k__Bacteria;p__Actinobacteria;c__unidentified_Actinobacteria;o__Pseudonocardiales;f__Pseudonocardiaceae;g__Pseudonocardia | 1 |
| OTU_2049 | k__Bacteria;p__Proteobacteria;c__Alphaproteobacteria;o__Rickettsiales;f__unidentified_Rickettsiales;g__unidentified_Rickettsiales;s__ | 0.99 |
| OTU_2048 | k__Bacteria;p__Bacteroidetes;c__Bacteroidia;o__Bacteroidales;f__Muribaculaceae;g__;s__ | 0.99 |
| OTU_2519 | k__Bacteria;p__Proteobacteria;c__Gammaproteobacteria;o__Pseudomonadales;f__Pseudomonadaceae;g__Pseudomonas;s__Pseudomonas_pachastrellae | 1 |
| OTU_154 | k__Bacteria;p__Firmicutes;c__Clostridia;o__Clostridiales;f__unidentified_Clostridiales;g__unidentified_Clostridiales | 0.86 |
| OTU_2043 | k__Bacteria;p__Proteobacteria;c__Alphaproteobacteria;o__unidentified_Alphaproteobacteria;f__unidentified_Alphaproteobacteria;g__unidentified_Alphaproteobacteria;s__alpha_proteobacterium_HIMB114 | 1 |
| OTU_2042 | k__Bacteria;p__Acidobacteria;c__Holophagae;o__;f__;g__;s__ | 1 |
| OTU_2041 | k__Bacteria;p__Proteobacteria;c__Deltaproteobacteria;o__;f__;g__;s__ | 0.9 |
| OTU_155 | k__Bacteria;p__Cyanobacteria;c__unidentified_Cyanobacteria;o__unidentified_Cyanobacteria;f__unidentified_Cyanobacteria;g__unidentified_Cyanobacteria | 0.98 |
| OTU_2047 | k__Bacteria;p__Firmicutes;c__Bacilli;o__Bacillales;f__Paenibacillaceae;g__Paenibacillus;s__Paenibacillus_alginolyticus | 0.81 |
| OTU_2046 | k__Bacteria;p__Firmicutes;c__Bacilli;o__Lactobacillales;f__Lactobacillaceae;g__Lactobacillus | 1 |
| OTU_2045 | k__Bacteria;p__Proteobacteria;c__Alphaproteobacteria;o__Caulobacterales;f__Parvularculaceae | 0.99 |
| OTU_2044 | k__Bacteria | 1 |
| OTU_673 | k__Bacteria;p__Acidobacteria;c__Acidobacteriia;o__Solibacterales;f__unidentified_Solibacterales;g__Candidatus_Solibacter | 1 |
| OTU_332 | k__Bacteria;p__Bacteroidetes;c__Bacteroidia;o__Flavobacteriales;f__;g__;s__ | 0.83 |
| OTU_671 | k__Bacteria;p__Firmicutes;c__Clostridia;o__Clostridiales;f__Lachnospiraceae;g__Anaerosporobacter;s__ | 0.85 |
| OTU_670 | k__Bacteria;p__Actinobacteria;c__Acidimicrobiia;o__;f__;g__;s__ | 0.84 |
| OTU_1518 | k__Bacteria;p__Proteobacteria;c__Alphaproteobacteria;o__unidentified_Alphaproteobacteria;f__unidentified_Alphaproteobacteria | 0.85 |
| OTU_676 | k__Bacteria;p__Proteobacteria;c__Alphaproteobacteria;o__unidentified_Alphaproteobacteria;f__unidentified_Alphaproteobacteria | 0.92 |
| OTU_675 | k__Bacteria;p__Proteobacteria;c__Gammaproteobacteria;o__Alteromonadales;f__Colwelliaceae;g__Thalassotalea | 1 |
| OTU_333 | k__Bacteria;p__Firmicutes;c__Bacilli;o__Lactobacillales;f__Carnobacteriaceae;g__Pisciglobus;s__ | 0.99 |
| OTU_2390 | k__Bacteria;p__Chloroflexi;c__Anaerolineae;o__Caldilineales;f__Caldilineaceae | 1 |
| OTU_1515 | k__Bacteria;p__Actinobacteria;c__unidentified_Actinobacteria;o__Propionibacteriales;f__Nocardioidaceae;g__Nocardioides | 0.96 |
| OTU_679 | k__Bacteria;p__Bacteroidetes;c__Bacteroidia;o__Bacteroidales;f__Muribaculaceae;g__;s__ | 1 |
| OTU_678 | k__Bacteria;p__Proteobacteria;c__Alphaproteobacteria;o__Micropepsales;f__Micropepsaceae;g__;s__ | 0.91 |
| OTU_1510 | k__Bacteria;p__Proteobacteria;c__Gammaproteobacteria;o__unidentified_Gammaproteobacteria;f__Burkholderiaceae;g__Parasutterella;s__ | 1 |
| OTU_330 | k__Bacteria;p__Proteobacteria;c__Deltaproteobacteria;o__Myxococcales;f__;g__;s__ | 0.83 |
| OTU_1512 | k__Bacteria;p__Firmicutes;c__Clostridia;o__Clostridiales;f__Ruminococcaceae | 0.97 |
| OTU_1513 | k__Bacteria;p__Firmicutes;c__Clostridia;o__Clostridiales | 0.84 |
| OTU_331 | k__Bacteria;p__Firmicutes;c__Clostridia;o__Clostridiales;f__Eubacteriaceae;g__Eubacterium;s__Eubacterium_limosum | 0.99 |
| OTU_336 | k__Bacteria;p__Chloroflexi;c__Anaerolineae;o__;f__;g__;s__ | 0.85 |
| OTU_337 | k__Bacteria;p__Deinococcus-Thermus;c__Deinococci;o__Deinococcales;f__Deinococcaceae;g__Deinococcus;s__Deinococcus_grandis | 1 |
| OTU_886 | k__Bacteria;p__Fusobacteria;c__Fusobacteriia;o__Fusobacteriales;f__Leptotrichiaceae;g__Leptotrichia | 1 |
| OTU_887 | k__Bacteria;p__Acidobacteria;c__Acidobacteriia;o__Acidobacteriales;f__unidentified_Acidobacteriales | 1 |
| OTU_499 | k__Bacteria;p__Bacteroidetes;c__Bacteroidia;o__Bacteroidales | 0.93 |
| OTU_498 | k__Bacteria;p__Bacteroidetes;c__Bacteroidia;o__Bacteroidales;f__Prevotellaceae;g__unidentified_Prevotellaceae;s__Prevotella_pleuritidis | 0.99 |
| OTU_497 | k__Bacteria;p__Bacteroidetes;c__Bacteroidia;o__Bacteroidales;f__Rikenellaceae;g__Alistipes;s__ | 0.98 |
| OTU_496 | k__Bacteria;p__Actinobacteria;c__Thermoleophilia;o__Solirubrobacterales;f__;g__;s__ | 1 |
| OTU_495 | k__Bacteria;p__Firmicutes;c__Clostridia;o__Clostridiales;f__Lachnospiraceae;g__Roseburia;s__Roseburia_inulinivorans | 0.98 |
| OTU_494 | k__Bacteria;p__Firmicutes;c__Clostridia;o__Clostridiales;f__Lachnospiraceae | 1 |
| OTU_493 | k__Bacteria;p__Bacteroidetes;c__Bacteroidia;o__Bacteroidales;f__Rikenellaceae;g__Alistipes;s__ | 0.96 |
| OTU_492 | k__Bacteria;p__Bacteroidetes;c__Bacteroidia;o__Chitinophagales;f__Saprospiraceae | 1 |
| OTU_491 | k__Bacteria;p__Proteobacteria;c__Alphaproteobacteria;o__unidentified_Alphaproteobacteria;f__Acetobacteraceae | 1 |
| OTU_490 | k__Bacteria;p__Proteobacteria;c__Alphaproteobacteria;o__Sphingomonadales;f__Sphingomonadaceae;g__Sphingorhabdus | 0.9 |
| OTU_1420 | k__Bacteria;p__Cyanobacteria;c__unidentified_Cyanobacteria;o__unidentified_Cyanobacteria;f__unidentified_Cyanobacteria;g__unidentified_Cyanobacteria;s__Phalacroma_mitra | 0.85 |
| OTU_250 | k__Bacteria;p__Actinobacteria;c__Acidimicrobiia;o__;f__;g__;s__ | 0.95 |
| OTU_253 | k__Bacteria;p__Actinobacteria;c__Thermoleophilia;o__Solirubrobacterales;f__Solirubrobacteraceae;g__Conexibacter;s__ | 0.99 |
| OTU_252 | k__Bacteria;p__Bacteroidetes;c__Bacteroidia;o__Bacteroidales;f__Muribaculaceae;g__;s__ | 0.83 |
| OTU_255 | k__Bacteria;p__Actinobacteria;c__Thermoleophilia;o__Solirubrobacterales;f__Solirubrobacteraceae;g__Conexibacter | 0.99 |
| OTU_254 | k__Bacteria;p__Proteobacteria;c__Gammaproteobacteria | 0.97 |
| OTU_709 | k__Bacteria;p__Firmicutes;c__Clostridia;o__Clostridiales;f__Lachnospiraceae;g__unidentified_Lachnospiraceae;s__Clostridiaceae_bacterium_SH032 | 0.93 |
| OTU_708 | k__Bacteria;p__Proteobacteria;c__Alphaproteobacteria;o__Sphingomonadales;f__Sphingomonadaceae;g__Altererythrobacter | 0.82 |
| OTU_259 | k__Bacteria;p__Proteobacteria;c__Alphaproteobacteria;o__Caulobacterales;f__Caulobacteraceae;g__Brevundimonas | 1 |
| OTU_258 | k__Bacteria;p__Tenericutes;c__Mollicutes | 0.88 |
| OTU_705 | k__Bacteria;p__Proteobacteria;c__Gammaproteobacteria;o__unidentified_Gammaproteobacteria;f__Nitrosomonadaceae;g__Nitrosospira;s__ | 0.81 |
| OTU_704 | k__Bacteria;p__Acidobacteria;c__unidentified_Acidobacteria;o__unidentified_Acidobacteria;f__unidentified_Acidobacteria;g__unidentified_Acidobacteria;s__Acidobacteria_bacterium_RBG_16_70_10 | 0.81 |
| OTU_703 | k__Bacteria;p__Chloroflexi;c__unidentified_Chloroflexi;o__unidentified_Chloroflexi;f__unidentified_Chloroflexi;g__unidentified_Chloroflexi;s__Chloroflexi_bacterium_OLB14 | 0.92 |
| OTU_702 | k__Bacteria;p__Actinobacteria;c__Thermoleophilia | 0.96 |
| OTU_701 | k__Bacteria;p__Proteobacteria;c__Gammaproteobacteria;o__Pseudomonadales;f__Moraxellaceae;g__Moraxella | 0.84 |
| OTU_700 | k__Bacteria;p__Verrucomicrobia;c__Verrucomicrobiae;o__Chthoniobacterales;f__Chthoniobacteraceae;g__Candidatus_Udaeobacter;s__ | 1 |
| OTU_729 | k__Bacteria;p__Proteobacteria;c__Gammaproteobacteria;o__unidentified_Gammaproteobacteria;f__unidentified_Gammaproteobacteria;g__Candidatus_Ovatusbacter;s__ | 0.99 |
| OTU_1908 | k__Bacteria;p__Firmicutes;c__Bacilli;o__Lactobacillales;f__Streptococcaceae;g__Streptococcus;s__Streptococcus_sp_canine_oral_taxon_279 | 0.95 |
| OTU_728 | k__Bacteria;p__Firmicutes;c__Clostridia;o__Clostridiales;f__Lachnospiraceae;g__unidentified_Lachnospiraceae;s__Lachnospiraceae_bacterium_DW67 | 0.97 |
| OTU_239 | k__Bacteria;p__Bacteroidetes;c__Bacteroidia;o__Bacteroidales;f__Bacteroidaceae;g__Bacteroides;s__Bacteroides_sartorii | 0.96 |
| OTU_383 | k__Bacteria;p__Bacteroidetes;c__Bacteroidia;o__Cytophagales;f__Hymenobacteraceae;g__Pontibacter | 1 |
| OTU_382 | k__Bacteria;p__Proteobacteria;c__Gammaproteobacteria;o__Cellvibrionales;f__Halieaceae;g__Luminiphilus;s__ | 1 |
| OTU_381 | k__Bacteria;p__Proteobacteria;c__Gammaproteobacteria;o__Enterobacteriales;f__Enterobacteriaceae | 1 |
| OTU_380 | k__Bacteria;p__Firmicutes;c__Clostridia;o__Clostridiales;f__Ruminococcaceae | 0.96 |
| OTU_387 | k__Bacteria;p__Actinobacteria;c__Thermoleophilia;o__Gaiellales;f__;g__;s__ | 0.96 |
| OTU_386 | k__Bacteria;p__Proteobacteria;c__Alphaproteobacteria;o__Rhodobacterales;f__Rhodobacteraceae;g__Amaricoccus;s__ | 0.95 |
| OTU_385 | k__Bacteria;p__Acidobacteria;c__Acidobacteriia;o__;f__;g__;s__ | 1 |
| OTU_384 | k__Bacteria;p__Actinobacteria;c__Acidimicrobiia | 0.88 |
| OTU_389 | k__Bacteria;p__Chlamydiae;c__unidentified_Chlamydiae;o__Chlamydiales;f__Simkaniaceae;g__;s__ | 0.88 |
| OTU_388 | k__Bacteria;p__Firmicutes;c__Bacilli;o__Lactobacillales;f__Streptococcaceae;g__Streptococcus;s__Streptococcus_minor | 1 |
| OTU_109 | k__Bacteria;p__Actinobacteria;c__unidentified_Actinobacteria;o__Corynebacteriales;f__Corynebacteriaceae;g__unidentified_Corynebacteriaceae;s__Corynebacterium_tuberculostearicum | 1 |
| OTU_233 | k__Bacteria;p__Firmicutes;c__Erysipelotrichia;o__Erysipelotrichales;f__Erysipelotrichaceae;g__Faecalibaculum;s__ | 1 |
| OTU_2934 | k__Bacteria;p__Bacteroidetes;c__Bacteroidia;o__Bacteroidales;f__Prevotellaceae;g__unidentified_Prevotellaceae;s__Prevotella_sp_oral_clone_DA058 | 0.96 |
| OTU_232 | k__Bacteria;p__Bacteroidetes;c__Bacteroidia;o__Sphingobacteriales;f__Sphingobacteriaceae;g__Pedobacter | 0.99 |
| OTU_231 | k__Bacteria;p__Firmicutes;c__Bacilli;o__Lactobacillales;f__Lactobacillaceae;g__Lactobacillus;s__Lactobacillus_aviarius | 0.97 |
| OTU_1734 | k__Bacteria;p__Proteobacteria;c__Alphaproteobacteria;o__Rhodobacterales;f__Rhodobacteraceae | 1 |
| OTU_1735 | k__Bacteria;p__Chloroflexi;c__Anaerolineae | 0.94 |
| OTU_819 | k__Bacteria;p__Actinobacteria;c__unidentified_Actinobacteria;o__Frankiales;f__Acidothermaceae;g__Acidothermus | 0.96 |
| OTU_230 | k__Bacteria;p__Proteobacteria;c__Alphaproteobacteria;o__unidentified_Alphaproteobacteria;f__unidentified_Alphaproteobacteria | 0.98 |
| OTU_1730 | k__Bacteria;p__Bacteroidetes;c__Bacteroidia;o__Flavobacteriales;f__Flavobacteriaceae;g__Lutimonas;s__ | 0.99 |
| OTU_1731 | k__Bacteria;p__Actinobacteria;c__unidentified_Actinobacteria;o__Frankiales;f__Sporichthyaceae;g__Candidatus_Planktophila;s__ | 0.99 |
| OTU_1732 | k__Bacteria;p__Bacteroidetes;c__Ignavibacteria;o__Ignavibacteriales | 1 |
| OTU_1733 | k__Bacteria;p__Proteobacteria;c__Alphaproteobacteria;o__unidentified_Alphaproteobacteria;f__unidentified_Alphaproteobacteria;g__unidentified_Alphaproteobacteria | 0.86 |
| OTU_813 | k__Bacteria;p__Actinobacteria;c__unidentified_Actinobacteria;o__Bifidobacteriales;f__Bifidobacteriaceae;g__Bifidobacterium | 0.86 |
| OTU_812 | k__Bacteria;p__Actinobacteria;c__unidentified_Actinobacteria;o__Streptomycetales;f__Streptomycetaceae;g__Streptomyces | 1 |
| OTU_811 | k__Bacteria;p__Bacteroidetes;c__Bacteroidia;o__Chitinophagales;f__Chitinophagaceae;g__Ferruginibacter | 1 |
| OTU_810 | k__Bacteria;p__Proteobacteria;c__Deltaproteobacteria;o__Bdellovibrionales;f__Bdellovibrionaceae;g__Bdellovibrio | 1 |
| OTU_817 | k__Bacteria;p__Bacteroidetes;c__Bacteroidia;o__Cytophagales;f__Hymenobacteraceae;g__Hymenobacter | 1 |
| OTU_816 | k__Bacteria;p__Acidobacteria;c__Acidobacteriia;o__Acidobacteriales;f__unidentified_Acidobacteriales;g__Terracidiphilus;s__ | 0.99 |
| OTU_815 | k__Bacteria;p__Proteobacteria;c__Alphaproteobacteria;o__unidentified_Alphaproteobacteria;f__Acetobacteraceae;g__Roseomonas | 0.99 |
| OTU_814 | k__Bacteria;p__Bacteroidetes;c__Bacteroidia;o__Chitinophagales;f__Chitinophagaceae;g__Ferruginibacter;s__ | 0.99 |
| OTU_727 | k__Bacteria;p__Actinobacteria;c__Thermoleophilia;o__Solirubrobacterales;f__Solirubrobacteraceae;g__Solirubrobacter;s__ | 1 |
| OTU_726 | k__Bacteria;p__Proteobacteria;c__Alphaproteobacteria;o__Caulobacterales;f__Hyphomonadaceae;g__Hirschia;s__ | 1 |
| OTU_927 | k__Bacteria;p__Proteobacteria;c__Gammaproteobacteria;o__unidentified_Gammaproteobacteria;f__unidentified_Gammaproteobacteria;g__Aquicella;s__ | 1 |
| OTU_926 | k__Bacteria;p__Proteobacteria;c__Alphaproteobacteria;o__Caulobacterales;f__Caulobacteraceae;g__Asticcacaulis;s__ | 1 |
| OTU_925 | k__Bacteria;p__Proteobacteria;c__Alphaproteobacteria;o__Rhizobiales | 1 |
| OTU_924 | k__Bacteria;p__Acidobacteria;c__Acidobacteriia;o__;f__;g__;s__ | 0.87 |
| OTU_923 | k__Bacteria;p__Actinobacteria;c__unidentified_Actinobacteria;o__Micrococcales;f__Microbacteriaceae | 0.99 |
| OTU_922 | k__Bacteria;p__Proteobacteria;c__Gammaproteobacteria;o__Oceanospirillales;f__unidentified_Oceanospirillales;g__Pseudohongiella;s__ | 1 |
| OTU_921 | k__Bacteria;p__Proteobacteria;c__Alphaproteobacteria;o__unidentified_Alphaproteobacteria;f__unidentified_Alphaproteobacteria | 0.92 |
| OTU_920 | k__Bacteria;p__Proteobacteria;c__Gammaproteobacteria;o__unidentified_Gammaproteobacteria;f__unidentified_Gammaproteobacteria;g__unidentified_Gammaproteobacteria | 0.91 |
| OTU_1640 | k__Bacteria;p__Firmicutes;c__Negativicutes;o__Selenomonadales;f__Veillonellaceae;g__unidentified_Veillonellaceae;s__Propionispora_sp | 0.98 |
| OTU_1641 | k__Bacteria;p__Actinobacteria;c__Acidimicrobiia;o__;f__;g__;s__ | 0.97 |
| OTU_1642 | k__Bacteria | 1 |
| OTU_1643 | k__Bacteria;p__Bacteroidetes;c__Bacteroidia;o__Chitinophagales;f__Chitinophagaceae | 1 |
| OTU_1644 | k__Bacteria;p__Tenericutes;c__Mollicutes;o__Mycoplasmatales;f__Mycoplasmataceae;g__Ureaplasma | 0.97 |
| OTU_1645 | k__Bacteria;p__Proteobacteria;c__Alphaproteobacteria;o__Rickettsiales;f__unidentified_Rickettsiales;g__unidentified_Rickettsiales;s__ | 1 |
| OTU_929 | k__Bacteria;p__Proteobacteria;c__Alphaproteobacteria;o__Caulobacterales;f__Hyphomonadaceae;g__Maricaulis;s__Maricaulis_virginensis | 0.93 |
| OTU_928 | k__Bacteria;p__Firmicutes;c__Erysipelotrichia;o__Erysipelotrichales;f__Erysipelotrichaceae | 0.99 |
| OTU_1345 | k__Bacteria;p__Firmicutes;c__Clostridia;o__Clostridiales;f__Ruminococcaceae | 1 |
| OTU_1344 | k__Bacteria;p__Proteobacteria;c__Alphaproteobacteria;o__Rhizobiales;f__unidentified_Rhizobiales;g__Bauldia;s__ | 0.99 |
| OTU_1347 | k__Archaea;p__;c__;o__;f__;g__;s__ | 0.93 |
| OTU_1346 | k__Bacteria;p__Cyanobacteria;c__unidentified_Cyanobacteria;o__unidentified_Cyanobacteria | 1 |
| OTU_1341 | k__Bacteria;p__Planctomycetes;c__Phycisphaerae;o__Phycisphaerales;f__Phycisphaeraceae;g__;s__ | 1 |
| OTU_1340 | k__Bacteria;p__Bacteroidetes;c__Bacteroidia;o__Bacteroidales;f__Prevotellaceae;g__Prevotella;s__Prevotella_pallens | 0.84 |
| OTU_1343 | k__Bacteria;p__Proteobacteria;c__Gammaproteobacteria;o__Xanthomonadales;f__Rhodanobacteraceae;g__Chujaibacter;s__ | 0.98 |
| OTU_1342 | k__Bacteria;p__Firmicutes;c__Clostridia;o__Clostridiales;f__Ruminococcaceae;g__Oscillibacter | 1 |
| OTU_1349 | k__Bacteria;p__Planctomycetes;c__Planctomycetacia;o__unidentified_Planctomycetacia;f__Gemmataceae;g__;s__ | 1 |
| OTU_1348 | k__Bacteria;p__Tenericutes;c__Mollicutes;o__Mycoplasmatales;f__Mycoplasmataceae;g__Mycoplasma;s__Mycoplasma_hyorhinis | 1 |
| OTU_2788 | k__Bacteria;p__Proteobacteria;c__Alphaproteobacteria;o__unidentified_Alphaproteobacteria;f__unidentified_Alphaproteobacteria;g__unidentified_Alphaproteobacteria;s__Acetobacteraceae_bacterium_WX59 | 0.93 |
| OTU_1239 | k__Bacteria;p__Planctomycetes;c__Planctomycetacia;o__;f__;g__;s__ | 1 |
| OTU_1238 | k__Bacteria;p__Actinobacteria;c__unidentified_Actinobacteria;o__Micromonosporales;f__Micromonosporaceae | 0.97 |
| OTU_1231 | k__Bacteria;p__Firmicutes;c__Clostridia;o__Clostridiales;f__Lachnospiraceae | 1 |
| OTU_1230 | k__Bacteria;p__Actinobacteria;c__Acidimicrobiia | 1 |
| OTU_1233 | k__Bacteria;p__Firmicutes;c__Clostridia;o__Clostridiales;f__Ruminococcaceae;g__unidentified_Ruminococcaceae;s__Carnobacterium_sp_N15MGS-251 | 0.89 |
| OTU_1232 | k__Bacteria;p__Proteobacteria;c__Deltaproteobacteria;o__Bdellovibrionales;f__Bdellovibrionaceae;g__Bdellovibrio;s__ | 1 |
| OTU_1235 | k__Bacteria | 0.88 |
| OTU_1234 | k__Bacteria;p__Proteobacteria;c__Deltaproteobacteria;o__Myxococcales | 1 |
| OTU_1237 | k__Bacteria;p__Acidobacteria;c__Acidobacteriia;o__;f__;g__;s__ | 0.97 |
| OTU_1236 | k__Bacteria;p__Bacteroidetes;c__Bacteroidia;o__Bacteroidales;f__Prevotellaceae | 1 |
| OTU_544 | k__Bacteria;p__Latescibacteria;c__;o__;f__;g__;s__ | 1 |
| OTU_415 | k__Bacteria;p__Verrucomicrobia;c__Verrucomicrobiae;o__Opitutales;f__Opitutaceae;g__;s__ | 0.99 |
| OTU_2424 | k__Bacteria;p__Firmicutes;c__Clostridia;o__Clostridiales;f__Syntrophomonadaceae;g__Syntrophomonas | 0.99 |
| OTU_1706 | k__Bacteria;p__Firmicutes;c__Clostridia;o__Clostridiales;f__Ruminococcaceae | 0.8 |
| OTU_835 | k__Bacteria;p__Firmicutes;c__Clostridia;o__Clostridiales;f__unidentified_Clostridiales;g__unidentified_Clostridiales;s__Clostridium_fallax | 0.99 |
| OTU_2458 | k__Bacteria;p__Bacteroidetes;c__Ignavibacteria | 0.91 |
| OTU_2459 | k__Bacteria;p__Firmicutes;c__Clostridia;o__Clostridiales;f__Lachnospiraceae | 1 |
| OTU_834 | k__Bacteria;p__Actinobacteria;c__unidentified_Actinobacteria;o__Propionibacteriales;f__Propionibacteriaceae;g__Microlunatus;s__ | 0.9 |
| OTU_2454 | k__Bacteria;p__Firmicutes;c__Clostridia;o__Clostridiales;f__Lachnospiraceae | 0.99 |
| OTU_2455 | k__Bacteria;p__Proteobacteria;c__Gammaproteobacteria;o__unidentified_Gammaproteobacteria;f__unidentified_Gammaproteobacteria;g__Aquicella;s__ | 0.99 |
| OTU_2456 | k__Bacteria;p__Firmicutes;c__Clostridia;o__Clostridiales;f__Ruminococcaceae;g__Ruminiclostridium;s__ | 0.87 |
| OTU_2457 | k__Bacteria;p__Firmicutes;c__Negativicutes;o__Selenomonadales;f__Veillonellaceae;g__Megamonas | 0.8 |
| OTU_2450 | k__Bacteria;p__Actinobacteria;c__unidentified_Actinobacteria;o__Micrococcales;f__Intrasporangiaceae;g__Aquipuribacter | 1 |
| OTU_837 | k__Bacteria;p__Proteobacteria;c__Alphaproteobacteria;o__Sphingomonadales;f__Sphingomonadaceae | 1 |
| OTU_2452 | k__Bacteria | 1 |
| OTU_2453 | k__Bacteria;p__Proteobacteria;c__Gammaproteobacteria;o__unidentified_Gammaproteobacteria;f__Burkholderiaceae | 0.93 |
| OTU_2298 | k__Bacteria;p__Acidobacteria;c__Acidobacteriia;o__;f__;g__;s__ | 0.84 |
| OTU_836 | k__Bacteria;p__Actinobacteria;c__Thermoleophilia;o__Solirubrobacterales | 1 |
| OTU_2292 | k__Bacteria;p__unidentified_Bacteria;c__unidentified_Bacteria;o__unidentified_Bacteria;f__unidentified_Bacteria | 0.86 |
| OTU_831 | k__Bacteria;p__Bacteroidetes;c__Bacteroidia;o__Chitinophagales;f__Chitinophagaceae;g__Niastella;s__ | 1 |
| OTU_2290 | k__Bacteria;p__Bacteroidetes;c__Bacteroidia;o__Chitinophagales;f__Chitinophagaceae;g__Dinghuibacter;s__ | 1 |
| OTU_2291 | k__Bacteria | 1 |
| OTU_2296 | k__Bacteria;p__Proteobacteria;c__Deltaproteobacteria;o__Myxococcales;f__Haliangiaceae;g__Haliangium | 1 |
| OTU_2297 | k__Bacteria;p__Proteobacteria;c__Gammaproteobacteria;o__unidentified_Gammaproteobacteria | 0.99 |
| OTU_2294 | k__Bacteria;p__Bacteroidetes;c__Bacteroidia;o__Bacteroidales;f__Prevotellaceae;g__Alloprevotella | 1 |
| OTU_830 | k__Bacteria;p__Verrucomicrobia;c__Verrucomicrobiae;o__Verrucomicrobiales;f__Akkermansiaceae;g__Akkermansia;s__ | 0.94 |
| OTU_1628 | k__Bacteria;p__Gemmatimonadetes;c__Longimicrobia;o__Longimicrobiales;f__Longimicrobiaceae;g__;s__ | 0.82 |
| OTU_2675 | k__Bacteria;p__Firmicutes;c__Clostridia;o__Clostridiales;f__Ruminococcaceae;g__Anaerobacterium;s__ | 0.83 |
| OTU_2676 | k__Bacteria;p__Actinobacteria;c__Thermoleophilia;o__Gaiellales;f__;g__;s__ | 0.94 |
| OTU_2677 | k__Bacteria | 1 |
| OTU_2670 | k__Bacteria;p__Proteobacteria;c__Gammaproteobacteria | 0.91 |
| OTU_833 | k__Bacteria;p__Bacteroidetes;c__Bacteroidia;o__Chitinophagales;f__Chitinophagaceae | 1 |
| OTU_2672 | k__Bacteria;p__Proteobacteria;c__Gammaproteobacteria;o__unidentified_Gammaproteobacteria;f__Nitrosomonadaceae | 0.8 |
| OTU_2673 | k__Bacteria;p__Firmicutes;c__Bacilli;o__Bacillales;f__Paenibacillaceae;g__Paenibacillus;s__Paenibacillus_polymyxa | 0.8 |
| OTU_832 | k__Bacteria;p__Firmicutes;c__Clostridia;o__Clostridiales;f__Lachnospiraceae;g__Lachnospira | 0.99 |
| OTU_2678 | k__Bacteria;p__Proteobacteria;c__Gammaproteobacteria;o__Enterobacteriales;f__Enterobacteriaceae | 1 |
| OTU_2679 | k__Bacteria;p__Bacteroidetes;c__Bacteroidia;o__Cytophagales;f__Hymenobacteraceae;g__Hymenobacter | 1 |
| OTU_1710 | k__Bacteria;p__Proteobacteria;c__Gammaproteobacteria;o__unidentified_Gammaproteobacteria | 1 |
| OTU_1629 | k__Bacteria;p__Proteobacteria;c__Gammaproteobacteria;o__unidentified_Gammaproteobacteria;f__Thioalkalispiraceae;g__Thiohalophilus;s__ | 0.95 |
| OTU_1711 | k__Bacteria;p__Chloroflexi;c__Dehalococcoidia | 0.98 |
| OTU_839 | k__Bacteria;p__Proteobacteria;c__Gammaproteobacteria;o__Xanthomonadales;f__Xanthomonadaceae | 1 |
| OTU_838 | k__Bacteria;p__Actinobacteria;c__unidentified_Actinobacteria;o__Micromonosporales;f__Micromonosporaceae | 1 |
| OTU_1703 | k__Bacteria;p__Proteobacteria;c__Alphaproteobacteria;o__Rhizobiales;f__;g__;s__ | 0.86 |
| OTU_349 | k__Bacteria;p__Bacteroidetes;c__Bacteroidia;o__Bacteroidales;f__Bacteroidaceae;g__Bacteroides | 1 |
| OTU_2078 | k__Bacteria;p__Firmicutes;c__Clostridia;o__Clostridiales;f__Ruminococcaceae | 1 |
| OTU_2079 | k__Bacteria;p__Proteobacteria;c__Gammaproteobacteria;o__unidentified_Gammaproteobacteria;f__Nitrosomonadaceae;g__unidentified_Nitrosomonadaceae | 0.8 |
| OTU_2076 | k__Bacteria;p__Proteobacteria;c__Gammaproteobacteria;o__Enterobacteriales;f__Enterobacteriaceae | 1 |
| OTU_2077 | k__Bacteria;p__Bacteroidetes;c__Bacteroidia;o__Bacteroidales;f__Rikenellaceae;g__;s__ | 1 |
| OTU_2074 | k__Bacteria | 1 |
| OTU_2075 | k__Archaea;p__Euryarchaeota;c__Thermoplasmata;o__;f__;g__;s__ | 1 |
| OTU_2072 | k__Bacteria;p__Proteobacteria;c__Alphaproteobacteria;o__Rhodobacterales;f__Rhodobacteraceae;g__Litorimicrobium;s__ | 0.83 |
| OTU_2073 | k__Bacteria;p__Proteobacteria;c__Gammaproteobacteria;o__Alteromonadales;f__Pseudoalteromonadaceae | 0.99 |
| OTU_2070 | k__Bacteria | 1 |
| OTU_2071 | k__Bacteria;p__Proteobacteria;c__Gammaproteobacteria;o__Alteromonadales;f__Idiomarinaceae;g__Idiomarina | 1 |
| OTU_660 | k__Bacteria;p__Firmicutes;c__Clostridia;o__Clostridiales;f__Ruminococcaceae;g__unidentified_Ruminococcaceae;s__Ruminococcus_bromii | 1 |
| OTU_661 | k__Bacteria;p__Firmicutes;c__Clostridia;o__Clostridiales;f__Ruminococcaceae;g__Anaerotruncus;s__ | 1 |
| OTU_662 | k__Bacteria;p__Firmicutes;c__Clostridia;o__Clostridiales;f__Ruminococcaceae;g__unidentified_Ruminococcaceae;s__Ruminococcus_bicirculans | 0.98 |
| OTU_663 | k__Bacteria;p__Acidobacteria;c__Acidobacteriia;o__Solibacterales;f__unidentified_Solibacterales;g__Candidatus_Solibacter;s__ | 0.99 |
| OTU_664 | k__Bacteria;p__Firmicutes;c__Bacilli;o__Lactobacillales;f__Lactobacillaceae;g__Lactobacillus;s__Lactobacillus_apis | 0.99 |
| OTU_665 | k__Bacteria;p__Proteobacteria;c__Gammaproteobacteria;o__unidentified_Gammaproteobacteria;f__unidentified_Gammaproteobacteria;g__Steroidobacter;s__ | 0.99 |
| OTU_666 | k__Bacteria;p__Actinobacteria;c__Acidimicrobiia;o__;f__;g__;s__ | 0.94 |
| OTU_667 | k__Bacteria;p__Bacteroidetes;c__Bacteroidia;o__Bacteroidales;f__unidentified_Bacteroidales | 1 |
| OTU_668 | k__Bacteria;p__Firmicutes;c__Clostridia;o__Clostridiales;f__unidentified_Clostridiales;g__unidentified_Clostridiales | 1 |
| OTU_669 | k__Bacteria;p__Firmicutes;c__Bacilli;o__Bacillales;f__unidentified_Bacillales;g__Thermicanus;s__ | 0.96 |
| OTU_1505 | k__Bacteria;p__Proteobacteria;c__Gammaproteobacteria;o__unidentified_Gammaproteobacteria;f__Burkholderiaceae;g__Bordetella | 0.94 |
| OTU_1504 | k__Bacteria;p__Actinobacteria | 1 |
| OTU_1503 | k__Bacteria;p__Chloroflexi;c__Ktedonobacteria;o__Ktedonobacterales;f__Ktedonobacteraceae;g__;s__ | 0.9 |
| OTU_1502 | k__Bacteria;p__Fusobacteria;c__Fusobacteriia;o__Fusobacteriales;f__Fusobacteriaceae | 1 |
| OTU_1501 | k__Bacteria;p__Proteobacteria;c__Alphaproteobacteria;o__unidentified_Alphaproteobacteria;f__Acetobacteraceae | 1 |
| OTU_1500 | k__Bacteria;p__Firmicutes;c__Clostridia;o__Clostridiales;f__Lachnospiraceae | 1 |
| OTU_952 | k__Bacteria;p__Chloroflexi;c__Anaerolineae;o__Caldilineales;f__Caldilineaceae | 0.97 |
| OTU_108 | k__Bacteria;p__Bacteroidetes;c__Bacteroidia;o__Bacteroidales;f__Muribaculaceae;g__;s__ | 1 |
| OTU_627 | k__Bacteria;p__Proteobacteria;c__Alphaproteobacteria;o__unidentified_Alphaproteobacteria;f__unidentified_Alphaproteobacteria;g__unidentified_Alphaproteobacteria;s__SAR116_cluster_alpha_proteobacterium_HIMB100 | 1 |
| OTU_953 | k__Bacteria;p__Proteobacteria;c__Deltaproteobacteria | 1 |
| OTU_488 | k__Bacteria;p__Firmicutes;c__Bacilli;o__Lactobacillales;f__Lactobacillaceae;g__Lactobacillus;s__Lactobacillus_ingluviei | 0.99 |
| OTU_489 | k__Bacteria;p__Proteobacteria;c__Alphaproteobacteria;o__Sphingomonadales;f__Sphingomonadaceae | 1 |
| OTU_484 | k__Bacteria;p__Proteobacteria;c__Deltaproteobacteria;o__Myxococcales;f__Sandaracinaceae;g__;s__ | 0.92 |
| OTU_485 | k__Bacteria;p__Proteobacteria;c__Gammaproteobacteria | 0.94 |
| OTU_486 | k__Bacteria;p__Proteobacteria;c__Alphaproteobacteria;o__Rhizobiales;f__Xanthobacteraceae | 0.97 |
| OTU_487 | k__Bacteria;p__Proteobacteria;c__Alphaproteobacteria;o__Rhizobiales;f__Beijerinckiaceae | 1 |
| OTU_480 | k__Bacteria | 0.98 |
| OTU_481 | k__Bacteria;p__Cyanobacteria | 1 |
| OTU_482 | k__Bacteria;p__Firmicutes;c__Clostridia;o__Clostridiales;f__Lachnospiraceae | 1 |
| OTU_483 | k__Bacteria;p__Planctomycetes;c__Planctomycetacia;o__unidentified_Planctomycetacia;f__Gemmataceae;g__;s__ | 1 |
| OTU_1433 | k__Bacteria;p__Firmicutes;c__Bacilli;o__Bacillales;f__Paenibacillaceae;g__Paenibacillus | 1 |
| OTU_1432 | k__Bacteria;p__Cyanobacteria;c__unidentified_Cyanobacteria;o__Synechococcales;f__unidentified_Synechococcales;g__unidentified_Synechococcales;s__Synechococcus_sp_RS9916 | 0.83 |
| OTU_1431 | k__Bacteria;p__Bacteroidetes;c__Bacteroidia;o__Bacteroidales;f__Marinifilaceae;g__Odoribacter;s__ | 1 |
| OTU_1430 | k__Bacteria;p__Proteobacteria;c__Gammaproteobacteria;o__unidentified_Gammaproteobacteria;f__Burkholderiaceae;g__unidentified_Burkholderiaceae | 1 |
| OTU_1437 | k__Bacteria;p__Firmicutes;c__Clostridia;o__Clostridiales;f__unidentified_Clostridiales;g__unidentified_Clostridiales | 0.99 |
| OTU_1436 | k__Bacteria;p__Actinobacteria;c__unidentified_Actinobacteria;o__Corynebacteriales;f__Corynebacteriaceae;g__unidentified_Corynebacteriaceae | 0.86 |
| OTU_1435 | k__Bacteria;p__Chloroflexi | 1 |
| OTU_1434 | k__Bacteria;p__Proteobacteria | 0.96 |
| OTU_714 | k__Bacteria;p__Actinobacteria;c__unidentified_Actinobacteria;o__Frankiales;f__Acidothermaceae;g__Acidothermus;s__ | 0.83 |
| OTU_715 | k__Bacteria;p__Proteobacteria;c__Alphaproteobacteria;o__Caulobacterales;f__Caulobacteraceae | 1 |
| OTU_716 | k__Bacteria;p__Proteobacteria;c__Alphaproteobacteria;o__Caulobacterales;f__Caulobacteraceae | 1 |
| OTU_717 | k__Bacteria;p__Proteobacteria;c__Gammaproteobacteria | 0.89 |
| OTU_710 | k__Bacteria;p__Bacteroidetes;c__Bacteroidia;o__Bacteroidales;f__unidentified_Bacteroidales;g__Proteiniphilum;s__ | 1 |
| OTU_711 | k__Bacteria;p__Firmicutes;c__Clostridia;o__Clostridiales;f__Ruminococcaceae | 1 |
| OTU_712 | k__Bacteria;p__Proteobacteria;c__Deltaproteobacteria;o__Myxococcales;f__Archangiaceae;g__Anaeromyxobacter | 0.95 |
| OTU_713 | k__Bacteria;p__Actinobacteria;c__Thermoleophilia;o__Solirubrobacterales | 0.97 |
| OTU_390 | k__Bacteria;p__Proteobacteria;c__Gammaproteobacteria;o__Alteromonadales;f__Shewanellaceae;g__Shewanella;s__Shewanella_putrefaciens | 0.99 |
| OTU_391 | k__Bacteria;p__Proteobacteria;c__Gammaproteobacteria;o__unidentified_Gammaproteobacteria;f__Coxiellaceae;g__Coxiella;s__ | 0.83 |
| OTU_392 | k__Bacteria;p__Bacteroidetes;c__Bacteroidia;o__Flavobacteriales;f__Flavobacteriaceae;g__;s__ | 1 |
| OTU_393 | k__Archaea;p__Euryarchaeota;c__Thermoplasmata | 1 |
| OTU_394 | k__Bacteria;p__Bacteroidetes;c__Bacteroidia;o__Flavobacteriales;f__Flavobacteriaceae;g__;s__ | 0.99 |
| OTU_395 | k__Bacteria;p__Firmicutes;c__Bacilli;o__Lactobacillales;f__Carnobacteriaceae;g__Atopostipes;s__ | 1 |
| OTU_396 | k__Bacteria;p__Firmicutes;c__Clostridia;o__Clostridiales;f__Ruminococcaceae;g__Subdoligranulum;s__ | 0.97 |
| OTU_397 | k__Bacteria;p__Chloroflexi;c__;o__;f__;g__;s__ | 1 |
| OTU_398 | k__Bacteria;p__Actinobacteria;c__unidentified_Actinobacteria;o__Propionibacteriales;f__Nocardioidaceae;g__Aeromicrobium;s__ | 1 |
| OTU_399 | k__Bacteria;p__Proteobacteria;c__Gammaproteobacteria;o__Legionellales;f__Legionellaceae;g__Legionella | 0.98 |
| OTU_956 | k__Bacteria;p__Firmicutes;c__Clostridia;o__Clostridiales;f__Ruminococcaceae;g__Faecalibacterium | 1 |
| OTU_2850 | k__Bacteria;p__Bacteroidetes;c__Bacteroidia;o__Cytophagales;f__Microscillaceae;g__;s__ | 0.98 |
| OTU_2851 | k__Bacteria;p__Firmicutes;c__Clostridia;o__Clostridiales | 0.96 |
| OTU_2852 | k__Bacteria;p__Firmicutes;c__Clostridia;o__Clostridiales;f__Ruminococcaceae | 0.99 |
| OTU_2853 | k__Bacteria;p__Proteobacteria;c__Gammaproteobacteria;o__unidentified_Gammaproteobacteria;f__unidentified_Gammaproteobacteria;g__Aquicella;s__ | 0.96 |
| OTU_2854 | k__Bacteria;p__Firmicutes;c__Clostridia;o__Clostridiales;f__Ruminococcaceae | 0.95 |
| OTU_2855 | k__Bacteria;p__Verrucomicrobia;c__Verrucomicrobiae;o__Verrucomicrobiales;f__Akkermansiaceae;g__Akkermansia;s__ | 1 |
| OTU_2856 | k__Bacteria;p__Bacteroidetes;c__Bacteroidia;o__Chitinophagales;f__Chitinophagaceae | 0.88 |
| OTU_2857 | k__Bacteria;p__Actinobacteria;c__Thermoleophilia;o__Solirubrobacterales;f__;g__;s__ | 0.82 |
| OTU_2858 | k__Bacteria;p__Firmicutes;c__Clostridia;o__Clostridiales;f__Gracilibacteraceae;g__Lutispora;s__ | 0.94 |
| OTU_2859 | k__Bacteria;p__Bacteroidetes;c__Bacteroidia;o__Chitinophagales;f__Chitinophagaceae;g__Ferruginibacter;s__ | 0.81 |
| OTU_1727 | k__Bacteria;p__unidentified_Bacteria;c__unidentified_Bacteria;o__unidentified_Bacteria;f__unidentified_Bacteria;g__Candidatus_Omnitrophus;s__ | 1 |
| OTU_1726 | k__Bacteria;p__Chloroflexi | 0.88 |
| OTU_1725 | k__Bacteria | 1 |
| OTU_1724 | k__Bacteria;p__Gemmatimonadetes;c__unidentified_Gemmatimonadetes;o__Gemmatimonadales;f__Gemmatimonadaceae;g__Gemmatimonas;s__ | 0.94 |
| OTU_1723 | k__Bacteria;p__Proteobacteria;c__Alphaproteobacteria | 1 |
| OTU_1722 | k__Bacteria;p__Actinobacteria;c__Acidimicrobiia;o__unidentified_Acidimicrobiia;f__Iamiaceae;g__Iamia;s__ | 0.98 |
| OTU_1721 | k__Bacteria;p__Acidobacteria;c__unidentified_Acidobacteria;o__unidentified_Acidobacteria;f__unidentified_Acidobacteria;g__Luteitalea;s__ | 0.98 |
| OTU_1720 | k__Bacteria;p__Chloroflexi;c__Anaerolineae;o__Anaerolineales;f__Anaerolineaceae;g__;s__ | 0.95 |
| OTU_800 | k__Bacteria;p__Bacteroidetes;c__Bacteroidia;o__Chitinophagales;f__Saprospiraceae;g__;s__ | 0.92 |
| OTU_801 | k__Bacteria;p__Actinobacteria;c__Acidimicrobiia | 0.93 |
| OTU_802 | k__Bacteria;p__Firmicutes;c__Bacilli;o__Bacillales;f__Paenibacillaceae;g__Aneurinibacillus | 1 |
| OTU_803 | k__Bacteria;p__Proteobacteria;c__Alphaproteobacteria;o__Caulobacterales;f__Hyphomonadaceae;g__Henriciella | 1 |
| OTU_804 | k__Bacteria;p__Acidobacteria;c__Acidobacteriia | 1 |
| OTU_805 | k__Bacteria;p__Chloroflexi;c__Anaerolineae;o__Anaerolineales;f__Anaerolineaceae;g__;s__ | 0.87 |
| OTU_1729 | k__Bacteria;p__Proteobacteria;c__Gammaproteobacteria;o__Oceanospirillales;f__unidentified_Oceanospirillales;g__Marinomonas;s__Marinomonas_gallaica | 0.89 |
| OTU_807 | k__Bacteria;p__Proteobacteria;c__Gammaproteobacteria;o__Cellvibrionales;f__Porticoccaceae | 0.97 |
| OTU_1620 | k__Bacteria;p__Proteobacteria;c__Gammaproteobacteria;o__unidentified_Gammaproteobacteria;f__Burkholderiaceae;g__Hydrogenophaga | 0.86 |
| OTU_1841 | k__Bacteria;p__Proteobacteria;c__Alphaproteobacteria;o__unidentified_Alphaproteobacteria;f__Acetobacteraceae | 0.99 |
| OTU_954 | k__Bacteria;p__Verrucomicrobia;c__Verrucomicrobiae | 1 |
| OTU_934 | k__Bacteria;p__Proteobacteria;c__Gammaproteobacteria;o__unidentified_Gammaproteobacteria;f__unidentified_Gammaproteobacteria;g__Aquicella;s__ | 0.99 |
| OTU_935 | k__Bacteria;p__Bacteroidetes;c__Bacteroidia;o__Sphingobacteriales;f__Sphingobacteriaceae;g__Pedobacter | 0.91 |
| OTU_1659 | k__Bacteria;p__Firmicutes;c__Clostridia;o__Clostridiales;f__Ruminococcaceae | 1 |
| OTU_937 | k__Bacteria;p__Actinobacteria;c__Thermoleophilia;o__Solirubrobacterales;f__Solirubrobacteraceae;g__Solirubrobacter;s__ | 0.98 |
| OTU_930 | k__Bacteria;p__Verrucomicrobia;c__Verrucomicrobiae;o__Chthoniobacterales;f__Chthoniobacteraceae;g__Chthoniobacter;s__ | 1 |
| OTU_931 | k__Bacteria;p__Chloroflexi;c__Ktedonobacteria;o__Ktedonobacterales;f__;g__;s__ | 0.95 |
| OTU_932 | k__Bacteria;p__Chloroflexi;c__Ktedonobacteria;o__Ktedonobacterales;f__Ktedonobacteraceae | 0.9 |
| OTU_933 | k__Bacteria;p__Acidobacteria;c__Acidobacteriia | 1 |
| OTU_1653 | k__Bacteria;p__Proteobacteria;c__Gammaproteobacteria;o__Cellvibrionales;f__Halieaceae;g__;s__ | 0.88 |
| OTU_1652 | k__Bacteria;p__Verrucomicrobia;c__Verrucomicrobiae;o__Chthoniobacterales;f__Chthoniobacteraceae;g__Chthoniobacter;s__ | 1 |
| OTU_1651 | k__Bacteria;p__Acidobacteria;c__Acidobacteriia;o__Solibacterales;f__unidentified_Solibacterales;g__Bryobacter;s__ | 1 |
| OTU_1650 | k__Bacteria;p__Spirochaetes;c__Spirochaetia | 0.81 |
| OTU_1657 | k__Bacteria;p__Proteobacteria;c__Alphaproteobacteria | 0.97 |
| OTU_1656 | k__Bacteria;p__Actinobacteria;c__Acidimicrobiia;o__unidentified_Acidimicrobiia;f__unidentified_Acidimicrobiia;g__Ilumatobacter;s__Ilumatobacter_fluminis | 0.85 |
| OTU_1655 | k__Bacteria;p__Actinobacteria;c__Thermoleophilia;o__Gaiellales;f__;g__;s__ | 0.86 |
| OTU_1654 | k__Bacteria;p__Proteobacteria;c__Gammaproteobacteria;o__unidentified_Gammaproteobacteria;f__unidentified_Gammaproteobacteria;g__unidentified_Gammaproteobacteria;s__Steroidobacter_sp_WWH78 | 1 |
| OTU_2167 | k__Bacteria;p__Chloroflexi;c__Anaerolineae;o__Anaerolineales;f__Anaerolineaceae;g__;s__ | 0.99 |
| OTU_1718 | k__Bacteria;p__Actinobacteria;c__Acidimicrobiia;o__;f__;g__;s__ | 0.94 |
| OTU_2160 | k__Bacteria;p__Firmicutes;c__Bacilli;o__Bacillales;f__Bacillaceae;g__Bacillus;s__Bacillus_aryabhattai | 0.99 |
| OTU_2518 | k__Bacteria;p__Firmicutes;c__Clostridia;o__Clostridiales;f__Lachnospiraceae;g__Syntrophococcus;s__ | 1 |
| OTU_1972 | k__Bacteria;p__Proteobacteria;c__Gammaproteobacteria | 0.97 |
| OTU_707 | k__Bacteria;p__Bacteroidetes;c__Bacteroidia;o__Chitinophagales;f__Saprospiraceae;g__;s__ | 1 |
| OTU_2162 | k__Bacteria;p__Actinobacteria;c__Acidimicrobiia | 1 |
| OTU_1973 | k__Bacteria;p__Proteobacteria;c__Alphaproteobacteria;o__unidentified_Alphaproteobacteria;f__Acetobacteraceae;g__Acetobacter;s__Acetobacter_pasteurianus | 0.97 |
| OTU_100 | k__Bacteria;p__Firmicutes;c__Clostridia;o__Clostridiales;f__unidentified_Clostridiales;g__Oceanirhabdus;s__Oceanirhabdus_sediminicola | 0.98 |
| OTU_2163 | k__Bacteria;p__Proteobacteria;c__Alphaproteobacteria;o__Rhizobiales;f__Rhizobiaceae | 0.99 |
| OTU_1970 | k__Bacteria;p__Bacteroidetes;c__Bacteroidia;o__Cytophagales;f__Cyclobacteriaceae;g__Imperialibacter;s__ | 0.8 |
| OTU_2515 | k__Bacteria;p__Proteobacteria;c__Alphaproteobacteria;o__Rhizobiales;f__unidentified_Rhizobiales;g__unidentified_Rhizobiales;s__Rhizobiales_bacterium_GB3 | 1 |
| OTU_1971 | k__Bacteria;p__Acidobacteria;c__Acidobacteriia;o__Solibacterales;f__unidentified_Solibacterales;g__Candidatus_Solibacter;s__ | 0.99 |
| OTU_1719 | k__Bacteria;p__Chloroflexi;c__Ktedonobacteria;o__Ktedonobacterales;f__Ktedonobacteraceae | 0.9 |
| OTU_2514 | k__Bacteria;p__Bacteroidetes;c__Bacteroidia;o__Chitinophagales;f__Saprospiraceae;g__;s__ | 0.93 |
| OTU_1976 | k__Bacteria | 1 |
| OTU_2517 | k__Bacteria;p__Proteobacteria;c__Alphaproteobacteria;o__Rickettsiales;f__;g__;s__ | 0.82 |
| OTU_1977 | k__Bacteria;p__Bacteroidetes;c__Bacteroidia;o__Bacteroidales;f__Muribaculaceae;g__;s__ | 0.99 |
| OTU_706 | k__Bacteria;p__Actinobacteria;c__Acidimicrobiia;o__;f__;g__;s__ | 0.91 |
| OTU_2040 | k__Bacteria;p__Bacteroidetes;c__Bacteroidia;o__Bacteroidales;f__Bacteroidaceae;g__Bacteroides;s__ | 0.95 |
| OTU_1974 | k__Bacteria;p__Firmicutes;c__Clostridia;o__Clostridiales;f__Christensenellaceae;g__;s__ | 0.98 |
| OTU_2511 | k__Bacteria;p__Proteobacteria;c__Deltaproteobacteria;o__Myxococcales;f__Haliangiaceae;g__Haliangium;s__ | 0.99 |
| OTU_1975 | k__Bacteria;p__Chloroflexi;c__Chloroflexia;o__Thermomicrobiales;f__;g__;s__ | 0.99 |
| OTU_2510 | k__Bacteria;p__Proteobacteria;c__Alphaproteobacteria;o__Rhizobiales;f__Rhizobiaceae | 0.99 |
| OTU_2513 | k__Bacteria;p__Firmicutes;c__Erysipelotrichia;o__Erysipelotrichales;f__Erysipelotrichaceae;g__Candidatus_Stoquefichus;s__ | 0.92 |
| OTU_2512 | k__Bacteria;p__Firmicutes;c__Clostridia;o__Clostridiales;f__Lachnospiraceae | 0.99 |
| OTU_958 | k__Bacteria;p__Proteobacteria;c__Alphaproteobacteria;o__unidentified_Alphaproteobacteria;f__unidentified_Alphaproteobacteria | 0.92 |
| OTU_672 | k__Bacteria;p__Bacteroidetes;c__Bacteroidia;o__Bacteroidales;f__Prevotellaceae;g__unidentified_Prevotellaceae;s__Prevotella_baroniae | 1 |
| OTU_822 | k__Bacteria;p__Actinobacteria;c__Thermoleophilia;o__Gaiellales;f__;g__;s__ | 1 |
| OTU_778 | k__Bacteria;p__Proteobacteria;c__Deltaproteobacteria;o__Myxococcales | 0.87 |
| OTU_779 | k__Bacteria;p__Firmicutes;c__Clostridia;o__Clostridiales;f__Ruminococcaceae | 0.83 |
| OTU_1248 | k__Bacteria;p__Chloroflexi;c__Ktedonobacteria;o__Ktedonobacterales | 0.87 |
| OTU_1249 | k__Bacteria;p__Proteobacteria;c__Alphaproteobacteria;o__Rickettsiales;f__unidentified_Rickettsiales;g__unidentified_Rickettsiales;s__ | 1 |
| OTU_1244 | k__Bacteria;p__Bacteroidetes;c__Bacteroidia | 0.98 |
| OTU_677 | k__Bacteria;p__Chloroflexi;c__Chloroflexia;o__Thermomicrobiales;f__;g__;s__ | 0.98 |
| OTU_1246 | k__Bacteria;p__Proteobacteria;c__Alphaproteobacteria;o__unidentified_Alphaproteobacteria;f__unidentified_Alphaproteobacteria;g__Dongia;s__ | 1 |
| OTU_1247 | k__Bacteria | 1 |
| OTU_1240 | k__Bacteria;p__Proteobacteria;c__Gammaproteobacteria;o__Acidiferrobacterales;f__Acidiferrobacteraceae;g__Sulfurifustis;s__ | 1 |
| OTU_1241 | k__Bacteria;p__Proteobacteria;c__Gammaproteobacteria;o__unidentified_Gammaproteobacteria;f__Nitrosomonadaceae;g__Nitrosomonas | 0.98 |
| OTU_1242 | k__Bacteria;p__Bacteroidetes;c__Bacteroidia;o__Bacteroidales;f__Rikenellaceae;g__unidentified_Rikenellaceae;s__Rikenellaceae_bacterium_DTU002 | 1 |
| OTU_1519 | k__Bacteria;p__Firmicutes;c__Clostridia;o__Clostridiales;f__Syntrophomonadaceae;g__Syntrophomonas;s__ | 0.92 |
| OTU_1088 | k__Bacteria;p__Bacteroidetes;c__Ignavibacteria;o__Ignavibacteriales;f__Ignavibacteriaceae;g__Ignavibacterium;s__Ignavibacterium_album | 0.84 |
| OTU_1089 | k__Bacteria;p__Chloroflexi;c__Anaerolineae;o__Anaerolineales;f__Anaerolineaceae;g__Anaerolinea;s__ | 1 |
| OTU_1082 | k__Bacteria;p__Bacteroidetes;c__Bacteroidia;o__Sphingobacteriales;f__;g__;s__ | 0.99 |
| OTU_1083 | k__Bacteria;p__Chloroflexi;c__Ktedonobacteria;o__Ktedonobacterales;f__;g__;s__ | 1 |
| OTU_1080 | k__Bacteria;p__Tenericutes;c__Mollicutes;o__Mycoplasmatales;f__Mycoplasmataceae;g__Mycoplasma | 1 |
| OTU_674 | k__Bacteria;p__Bacteroidetes;c__Bacteroidia;o__Sphingobacteriales;f__Sphingobacteriaceae | 1 |
| OTU_1086 | k__Bacteria;p__Proteobacteria;c__Deltaproteobacteria;o__Myxococcales;f__Polyangiaceae | 0.96 |
| OTU_1087 | k__Bacteria;p__Firmicutes;c__Clostridia;o__Clostridiales;f__Lachnospiraceae | 1 |
| OTU_1084 | k__Bacteria;p__Bacteroidetes;c__Bacteroidia | 0.87 |
| OTU_1085 | k__Bacteria;p__Bacteroidetes;c__Bacteroidia;o__Chitinophagales;f__Chitinophagaceae;g__Terrimonas;s__ | 1 |
| OTU_1514 | k__Bacteria;p__Bacteroidetes;c__Bacteroidia;o__Bacteroidales;f__Barnesiellaceae;g__;s__ | 0.96 |
| OTU_1516 | k__Bacteria;p__Proteobacteria;c__Alphaproteobacteria;o__Rhodobacterales;f__Rhodobacteraceae | 1 |
| OTU_1517 | k__Bacteria;p__unidentified_Bacteria;c__unidentified_Bacteria;o__unidentified_Bacteria;f__unidentified_Bacteria;g__unidentified_Bacteria | 1 |
| OTU_900 | k__Bacteria;p__Actinobacteria;c__unidentified_Actinobacteria;o__Propionibacteriales;f__Nocardioidaceae;g__Nocardioides | 0.97 |
| OTU_820 | k__Bacteria;p__Proteobacteria;c__Deltaproteobacteria;o__Myxococcales;f__Polyangiaceae | 0.89 |
| OTU_776 | k__Bacteria;p__Actinobacteria;c__unidentified_Actinobacteria;o__Frankiales;f__Geodermatophilaceae;g__Blastococcus;s__ | 0.97 |
| OTU_1511 | k__Bacteria;p__Verrucomicrobia;c__Verrucomicrobiae;o__Opitutales;f__Puniceicoccaceae;g__Cerasicoccus;s__ | 1 |
| OTU_1882 | k__Bacteria;p__Bacteroidetes;c__Bacteroidia;o__Cytophagales;f__Hymenobacteraceae | 0.81 |
| OTU_1883 | k__Bacteria;p__Caldiserica;c__Caldisericia;o__Caldisericales;f__Caldisericaceae;g__Caldisericum;s__ | 0.98 |
| OTU_1880 | k__Bacteria;p__Proteobacteria;c__Gammaproteobacteria;o__unidentified_Gammaproteobacteria;f__unidentified_Gammaproteobacteria;g__unidentified_Gammaproteobacteria;s__agricultural_soil_bacterium_SC-I-16 | 0.98 |
| OTU_1881 | k__Bacteria | 1 |
| OTU_1886 | k__Bacteria;p__Proteobacteria;c__Deltaproteobacteria;o__Oligoflexales;f__Oligoflexaceae;g__;s__ | 0.99 |
| OTU_1887 | k__Bacteria;p__Bacteroidetes;c__Bacteroidia;o__Cytophagales;f__Cyclobacteriaceae;g__Algoriphagus | 1 |
| OTU_1884 | k__Bacteria;p__Chloroflexi | 0.8 |
| OTU_1885 | k__Bacteria;p__Firmicutes;c__Clostridia;o__Clostridiales;f__unidentified_Clostridiales;g__Anaerovorax;s__ | 0.8 |
| OTU_1888 | k__Bacteria;p__Bacteroidetes;c__Bacteroidia;o__Sphingobacteriales;f__;g__;s__ | 0.98 |
| OTU_1889 | k__Bacteria;p__Firmicutes;c__Clostridia;o__Clostridiales;f__Lachnospiraceae;g__unidentified_Lachnospiraceae;s__bacterium_ic1296 | 1 |
| OTU_909 | k__Bacteria;p__Proteobacteria;c__Alphaproteobacteria;o__Rhizobiales;f__Rhizobiaceae;g__unidentified_Rhizobiaceae | 0.99 |
| OTU_1398 | k__Bacteria;p__Actinobacteria;c__Coriobacteriia;o__Coriobacteriales;f__Eggerthellaceae;g__Slackia;s__Slackia_exigua | 0.86 |
| OTU_1399 | k__Bacteria;p__Proteobacteria;c__Alphaproteobacteria;o__Rhizobiales;f__unidentified_Rhizobiales;g__Kaistia;s__ | 0.97 |
| OTU_1396 | k__Bacteria;p__Actinobacteria;c__Thermoleophilia;o__Solirubrobacterales;f__Solirubrobacteraceae | 0.93 |
| OTU_1397 | k__Bacteria;p__Bacteroidetes;c__Bacteroidia;o__Bacteroidales;f__Muribaculaceae;g__;s__ | 0.99 |
| OTU_1394 | k__Archaea;p__Euryarchaeota;c__Thermoplasmata;o__;f__;g__;s__ | 1 |
| OTU_1395 | k__Bacteria;p__Nitrospinae;c__Nitrospinia;o__Nitrospinales;f__Nitrospinaceae;g__Nitrospina;s__ | 1 |
| OTU_1392 | k__Bacteria;p__Bacteroidetes;c__Bacteroidia;o__Chitinophagales;f__Saprospiraceae;g__Aureispira;s__ | 1 |
| OTU_1393 | k__Bacteria;p__Bacteroidetes;c__Bacteroidia;o__Flavobacteriales | 0.93 |
| OTU_1390 | k__Bacteria;p__Verrucomicrobia;c__Verrucomicrobiae;o__Opitutales;f__Puniceicoccaceae | 0.85 |
| OTU_1391 | k__Bacteria;p__Proteobacteria;c__Deltaproteobacteria;o__Myxococcales;f__Archangiaceae;g__Anaeromyxobacter;s__bacterium_enrichment_culture_clone_auto7_4W | 0.83 |
| OTU_1868 | k__Bacteria;p__Gemmatimonadetes;c__unidentified_Gemmatimonadetes;o__Gemmatimonadales;f__Gemmatimonadaceae;g__Gemmatimonas;s__Microcystis_sp_SAG_4390 | 0.91 |
| OTU_1869 | k__Bacteria;p__Firmicutes;c__Clostridia;o__Clostridiales;f__Ruminococcaceae | 1 |
| OTU_826 | k__Bacteria;p__Bacteroidetes;c__Bacteroidia;o__Bacteroidales;f__Porphyromonadaceae;g__Porphyromonas | 0.99 |
| OTU_1860 | k__Bacteria;p__Actinobacteria;c__Thermoleophilia;o__Gaiellales;f__;g__;s__ | 0.9 |
| OTU_1861 | k__Bacteria;p__Actinobacteria;c__unidentified_Actinobacteria;o__Frankiales;f__Acidothermaceae;g__Acidothermus | 0.89 |
| OTU_2614 | k__Bacteria;p__Bacteroidetes;c__Bacteroidia;o__Bacteroidales | 0.99 |
| OTU_1863 | k__Bacteria;p__Proteobacteria;c__Alphaproteobacteria;o__unidentified_Alphaproteobacteria;f__Acetobacteraceae | 1 |
| OTU_1864 | k__Bacteria;p__unidentified_Bacteria;c__unidentified_Bacteria;o__unidentified_Bacteria;f__unidentified_Bacteria;g__unidentified_Bacteria | 0.88 |
| OTU_1865 | k__Bacteria;p__Actinobacteria;c__Coriobacteriia;o__Coriobacteriales;f__Eggerthellaceae;g__Enterorhabdus | 0.91 |
| OTU_1866 | k__Bacteria | 1 |
| OTU_1867 | k__Bacteria;p__Firmicutes;c__Bacilli;o__Lactobacillales;f__Streptococcaceae;g__Streptococcus | 1 |
| OTU_827 | k__Bacteria;p__Bacteroidetes;c__Bacteroidia;o__Flavobacteriales;f__unidentified_Flavobacteriales;g__Moheibacter;s__ | 0.99 |
| OTU_2449 | k__Bacteria;p__unidentified_Bacteria;c__unidentified_Bacteria;o__unidentified_Bacteria;f__unidentified_Bacteria;g__Candidatus_Entotheonella;s__ | 0.96 |
| OTU_2448 | k__Bacteria;p__Actinobacteria;c__Coriobacteriia;o__Coriobacteriales;f__Eggerthellaceae;g__Enterorhabdus;s__ | 0.97 |
| OTU_2447 | k__Bacteria;p__Proteobacteria | 0.84 |
| OTU_2446 | k__Bacteria;p__Planctomycetes;c__Planctomycetacia;o__Planctomycetales;f__unidentified_Planctomycetales;g__Planctopirus;s__ | 1 |
| OTU_2445 | k__Bacteria;p__Proteobacteria;c__Alphaproteobacteria;o__Caulobacterales;f__Hyphomonadaceae;g__;s__ | 0.94 |
| OTU_2444 | k__Bacteria;p__Verrucomicrobia;c__Verrucomicrobiae;o__Opitutales;f__Opitutaceae;g__Opitutus;s__ | 0.92 |
| OTU_2443 | k__Bacteria;p__Firmicutes;c__Clostridia;o__Clostridiales;f__Peptococcaceae;g__unidentified_Peptococcaceae | 0.98 |
| OTU_2442 | k__Bacteria;p__Bacteroidetes;c__Bacteroidia;o__Cytophagales;f__Cyclobacteriaceae;g__Imperialibacter;s__Imperialibacter_roseus | 0.91 |
| OTU_2441 | k__Bacteria;p__Proteobacteria;c__Gammaproteobacteria;o__Alteromonadales;f__Colwelliaceae;g__Thalassotalea;s__Thalassotalea_sp_LPB0090 | 0.99 |
| OTU_2440 | k__Bacteria;p__Firmicutes;c__Clostridia;o__Clostridiales;f__Ruminococcaceae | 0.97 |
| OTU_2289 | k__Bacteria;p__Bacteroidetes;c__Bacteroidia;o__Flavobacteriales;f__Cryomorphaceae;g__;s__ | 1 |
| OTU_2288 | k__Bacteria;p__Cyanobacteria;c__unidentified_Cyanobacteria;o__unidentified_Cyanobacteria;f__unidentified_Cyanobacteria;g__unidentified_Cyanobacteria;s__Picochlorum_sp_SENEW3 | 0.91 |
| OTU_2285 | k__Bacteria;p__Verrucomicrobia;c__Verrucomicrobiae;o__Verrucomicrobiales;f__Rubritaleaceae;g__Luteolibacter | 0.93 |
| OTU_2284 | k__Bacteria;p__Cyanobacteria;c__unidentified_Cyanobacteria;o__Nostocales | 0.97 |
| OTU_2287 | k__Bacteria;p__Fusobacteria;c__Fusobacteriia;o__Fusobacteriales;f__Fusobacteriaceae;g__Fusobacterium;s__Fusobacterium_sp_RMA_1065 | 0.8 |
| OTU_2286 | k__Bacteria;p__Proteobacteria;c__Gammaproteobacteria;o__Alteromonadales;f__Pseudoalteromonadaceae;g__Psychrosphaera;s__ | 0.99 |
| OTU_2281 | k__Bacteria;p__Proteobacteria;c__Alphaproteobacteria;o__Rhizobiales;f__unidentified_Rhizobiales | 0.85 |
| OTU_2280 | k__Bacteria;p__Firmicutes;c__Clostridia;o__Clostridiales;f__Lachnospiraceae;g__unidentified_Lachnospiraceae;s__Clostridium_sp_Culture-54 | 0.89 |
| OTU_2283 | k__Bacteria;p__Chlamydiae;c__unidentified_Chlamydiae;o__Chlamydiales;f__Simkaniaceae | 0.98 |
| OTU_2282 | k__Bacteria;p__Proteobacteria;c__Alphaproteobacteria;o__unidentified_Alphaproteobacteria;f__unidentified_Alphaproteobacteria | 0.83 |
| OTU_2667 | k__Bacteria;p__Melainabacteria;c__unidentified_Melainabacteria;o__Obscuribacterales;f__;g__;s__ | 1 |
| OTU_2666 | k__Bacteria;p__Actinobacteria;c__Acidimicrobiia;o__;f__;g__;s__ | 1 |
| OTU_2665 | k__Bacteria | 1 |
| OTU_2664 | k__Bacteria;p__Bacteroidetes;c__Bacteroidia;o__Sphingobacteriales;f__Sphingobacteriaceae;g__Sphingobacterium;s__Sphingobacterium_nematocida | 0.86 |
| OTU_2663 | k__Bacteria;p__Firmicutes;c__Clostridia;o__Clostridiales;f__Clostridiaceae;g__Anaeromicrobium;s__bacterium_enrichment_culture_clone_PKWE30-19 | 1 |
| OTU_2662 | k__Bacteria;p__Actinobacteria;c__unidentified_Actinobacteria;o__Pseudonocardiales;f__Pseudonocardiaceae;g__Pseudonocardia | 0.98 |
| OTU_2661 | k__Bacteria;p__Proteobacteria;c__Gammaproteobacteria;o__Enterobacteriales;f__Enterobacteriaceae | 1 |
| OTU_2660 | k__Bacteria;p__Armatimonadetes;c__;o__;f__;g__;s__ | 0.83 |
| OTU_2669 | k__Bacteria;p__Chlamydiae;c__unidentified_Chlamydiae;o__Chlamydiales;f__Simkaniaceae | 0.98 |
| OTU_2668 | k__Bacteria;p__Rokubacteria;c__unidentified_Rokubacteria;o__unidentified_Rokubacteria;f__unidentified_Rokubacteria;g__unidentified_Rokubacteria;s__NC10_bacterium_enrichment_culture_clone_Ino-F12 | 0.84 |
| OTU_825 | k__Bacteria;p__Spirochaetes;c__Spirochaetia;o__Spirochaetales;f__Spirochaetaceae;g__unidentified_Spirochaetaceae | 1 |
| OTU_3008 | k__Bacteria;p__Kiritimatiellaeota;c__Kiritimatiellae;o__;f__;g__;s__ | 0.99 |
| OTU_3009 | k__Bacteria;p__Planctomycetes;c__Phycisphaerae;o__Tepidisphaerales;f__;g__;s__ | 1 |
| OTU_3004 | k__Bacteria;p__Actinobacteria;c__unidentified_Actinobacteria;o__Micrococcales;f__Dermabacteraceae;g__Brachybacterium;s__Brachybacterium_paraconglomeratum | 0.99 |
| OTU_3005 | k__Bacteria;p__Proteobacteria;c__Alphaproteobacteria;o__Rickettsiales;f__unidentified_Rickettsiales;g__unidentified_Rickettsiales;s__ | 0.88 |
| OTU_3006 | k__Bacteria;p__Verrucomicrobia;c__Verrucomicrobiae;o__Chthoniobacterales;f__Chthoniobacteraceae | 0.98 |
| OTU_3007 | k__Bacteria;p__Bacteroidetes;c__Bacteroidia;o__Flavobacteriales;f__Crocinitomicaceae;g__Fluviicola;s__ | 0.87 |
| OTU_3000 | k__Bacteria;p__Proteobacteria;c__Alphaproteobacteria;o__unidentified_Alphaproteobacteria | 0.94 |
| OTU_3001 | k__Bacteria;p__Proteobacteria;c__Alphaproteobacteria;o__Rhizobiales;f__Hyphomicrobiaceae;g__Hyphomicrobium | 0.96 |
| OTU_3002 | k__Bacteria;p__Bacteroidetes;c__Bacteroidia;o__Sphingobacteriales;f__;g__;s__ | 0.9 |
| OTU_3003 | k__Bacteria;p__Actinobacteria;c__unidentified_Actinobacteria;o__Propionibacteriales;f__Nocardioidaceae;g__Nocardioides | 1 |
| OTU_2061 | k__Bacteria;p__Firmicutes;c__Clostridia;o__Clostridiales;f__unidentified_Clostridiales | 0.8 |
| OTU_2060 | k__Bacteria;p__Proteobacteria;c__Gammaproteobacteria;o__Oceanospirillales;f__Kangiellaceae;g__Kangiella;s__Kangiella_japonica | 1 |
| OTU_2063 | k__Bacteria;p__Bacteroidetes;c__Bacteroidia;o__Bacteroidales;f__Paludibacteraceae;g__Paludibacter | 1 |
| OTU_2062 | k__Bacteria;p__Firmicutes;c__Clostridia;o__Clostridiales | 0.86 |
| OTU_2065 | k__Bacteria;p__Firmicutes;c__Clostridia;o__Clostridiales;f__unidentified_Clostridiales;g__unidentified_Clostridiales | 0.95 |
| OTU_2064 | k__Bacteria;p__Bacteroidetes;c__Rhodothermia;o__Rhodothermales;f__Rhodothermaceae;g__Rubricoccus | 0.86 |
| OTU_2067 | k__Bacteria;p__Proteobacteria;c__Alphaproteobacteria;o__unidentified_Alphaproteobacteria;f__Paracaedibacteraceae | 0.81 |
| OTU_2066 | k__Bacteria;p__Proteobacteria;c__Gammaproteobacteria;o__unidentified_Gammaproteobacteria | 0.99 |
| OTU_2069 | k__Bacteria;p__Proteobacteria;c__Alphaproteobacteria;o__Rhizobiales;f__Beijerinckiaceae;g__Methylobacterium | 1 |
| OTU_2068 | k__Bacteria;p__Proteobacteria;c__Alphaproteobacteria;o__Caulobacterales;f__Hyphomonadaceae | 0.87 |
| OTU_1532 | k__Bacteria;p__Chloroflexi;c__Anaerolineae;o__;f__;g__;s__ | 0.83 |
| OTU_1533 | k__Bacteria;p__Proteobacteria;c__Gammaproteobacteria;o__unidentified_Gammaproteobacteria;f__Nitrosomonadaceae;g__;s__ | 1 |
| OTU_2719 | k__Bacteria;p__Actinobacteria;c__unidentified_Actinobacteria;o__Propionibacteriales;f__Nocardioidaceae;g__Nocardioides | 0.98 |
| OTU_2718 | k__Bacteria;p__Planctomycetes;c__;o__;f__;g__;s__ | 1 |
| OTU_1536 | k__Bacteria;p__Firmicutes;c__Erysipelotrichia;o__Erysipelotrichales;f__Erysipelotrichaceae;g__Faecalitalea;s__ | 0.94 |
| OTU_1537 | k__Bacteria;p__Proteobacteria;c__Deltaproteobacteria;o__Bdellovibrionales;f__Bacteriovoracaceae;g__Peredibacter | 1 |
| OTU_1534 | k__Bacteria;p__Acidobacteria;c__Acidobacteriia;o__;f__;g__;s__ | 0.94 |
| OTU_1535 | k__Bacteria;p__Actinobacteria;c__unidentified_Actinobacteria;o__Propionibacteriales;f__Propionibacteriaceae;g__Tessaracoccus | 1 |
| OTU_655 | k__Bacteria;p__unidentified_Bacteria;c__unidentified_Bacteria;o__unidentified_Bacteria;f__unidentified_Bacteria;g__Candidatus_Saccharimonas;s__ | 1 |
| OTU_654 | k__Bacteria;p__Actinobacteria;c__Thermoleophilia;o__Solirubrobacterales;f__;g__;s__ | 0.8 |
| OTU_657 | k__Bacteria;p__Bacteroidetes;c__Bacteroidia;o__Bacteroidales;f__Prevotellaceae;g__unidentified_Prevotellaceae;s__Prevotella_loescheii | 1 |
| OTU_2710 | k__Bacteria;p__Actinobacteria;c__unidentified_Actinobacteria;o__Frankiales;f__Sporichthyaceae;g__;s__ | 1 |
| OTU_123 | k__Bacteria;p__Firmicutes;c__Clostridia;o__Clostridiales;f__unidentified_Clostridiales;g__Sedimentibacter;s__ | 0.87 |
| OTU_650 | k__Bacteria;p__Actinobacteria;c__Thermoleophilia;o__Solirubrobacterales;f__Solirubrobacteraceae;g__Patulibacter;s__Patulibacter_minatonensis | 0.96 |
| OTU_653 | k__Bacteria;p__Bacteroidetes;c__Bacteroidia;o__Bacteroidales;f__Muribaculaceae;g__;s__ | 0.88 |
| OTU_652 | k__Bacteria;p__Bacteroidetes;c__Bacteroidia;o__Flavobacteriales;f__Flavobacteriaceae;g__Flavobacterium;s__Flavobacterium_indicum | 0.89 |
| OTU_83 | k__Bacteria;p__Firmicutes;c__Clostridia;o__Clostridiales;f__Lachnospiraceae;g__Blautia | 1 |
| OTU_82 | k__Bacteria;p__Actinobacteria;c__unidentified_Actinobacteria;o__Corynebacteriales;f__Dietziaceae;g__Dietzia;s__Dietzia_timorensis | 0.85 |
| OTU_2768 | k__Bacteria;p__Spirochaetes;c__Spirochaetia;o__Spirochaetales;f__Spirochaetaceae;g__unidentified_Spirochaetaceae;s__Treponema_sp_Ru2 | 0.82 |
| OTU_173 | k__Bacteria;p__Proteobacteria;c__Gammaproteobacteria;o__Xanthomonadales;f__Xanthomonadaceae;g__Lysobacter | 0.99 |
| OTU_174 | k__Bacteria;p__Proteobacteria;c__Deltaproteobacteria;o__Desulfovibrionales;f__Desulfovibrionaceae;g__Desulfovibrio | 1 |
| OTU_157 | k__Bacteria;p__Proteobacteria;c__Gammaproteobacteria;o__unidentified_Gammaproteobacteria;f__unidentified_Gammaproteobacteria;g__Acidibacter;s__ | 1 |
| OTU_175 | k__Bacteria;p__Bacteroidetes;c__Bacteroidia;o__Flavobacteriales;f__Flavobacteriaceae;g__Salinimicrobium;s__ | 0.96 |
| OTU_176 | k__Bacteria;p__Firmicutes;c__Clostridia;o__Clostridiales;f__Ruminococcaceae;g__Faecalibacterium;s__ | 1 |
| OTU_1577 | k__Bacteria;p__Spirochaetes;c__Spirochaetia;o__Spirochaetales;f__Spirochaetaceae;g__unidentified_Spirochaetaceae;s__Treponema_porcinum | 0.84 |
| OTU_84 | k__Bacteria;p__Bacteroidetes;c__Bacteroidia;o__Flavobacteriales;f__Flavobacteriaceae | 1 |
| OTU_1406 | k__Bacteria;p__Firmicutes;c__Clostridia;o__Clostridiales;f__Lachnospiraceae | 1 |
| OTU_1407 | k__Bacteria;p__Chloroflexi;c__Anaerolineae | 0.97 |
| OTU_1404 | k__Bacteria;p__Planctomycetes;c__Planctomycetacia;o__;f__;g__;s__ | 0.99 |
| OTU_1405 | k__Bacteria;p__Actinobacteria;c__Thermoleophilia;o__Gaiellales;f__Gaiellaceae;g__Gaiella;s__ | 1 |
| OTU_1402 | k__Bacteria;p__Proteobacteria;c__Gammaproteobacteria;o__unidentified_Gammaproteobacteria;f__unidentified_Gammaproteobacteria;g__Methylophaga | 1 |
| OTU_1403 | k__Bacteria;p__Cyanobacteria;c__unidentified_Cyanobacteria;o__Nostocales;f__Nostocaceae | 0.98 |
| OTU_1400 | k__Bacteria;p__Firmicutes;c__Clostridia;o__Clostridiales;f__unidentified_Clostridiales;g__unidentified_Clostridiales | 0.83 |
| OTU_1401 | k__Bacteria;p__Firmicutes;c__Clostridia;o__Clostridiales;f__Christensenellaceae;g__unidentified_Christensenellaceae | 0.8 |
| OTU_721 | k__Bacteria;p__Proteobacteria;c__Deltaproteobacteria;o__Desulfuromonadales;f__Geobacteraceae;g__Geobacter;s__Geobacter_soli | 0.95 |
| OTU_720 | k__Bacteria | 0.98 |
| OTU_723 | k__Bacteria;p__Proteobacteria;c__Gammaproteobacteria;o__unidentified_Gammaproteobacteria;f__Methylophilaceae;g__;s__ | 0.99 |
| OTU_722 | k__Bacteria;p__Bacteroidetes;c__Bacteroidia;o__Bacteroidales;f__;g__;s__ | 0.98 |
| OTU_725 | k__Bacteria;p__Proteobacteria;c__Alphaproteobacteria;o__Caulobacterales;f__Caulobacteraceae;g__;s__ | 0.95 |
| OTU_724 | k__Bacteria;p__Actinobacteria;c__unidentified_Actinobacteria;o__Frankiales;f__Acidothermaceae;g__Acidothermus;s__ | 1 |
| OTU_1408 | k__Bacteria;p__Proteobacteria;c__Alphaproteobacteria;o__Sphingomonadales;f__Sphingomonadaceae;g__Sphingomonas;s__Sphingomonas_aerolata | 1 |
| OTU_1409 | k__Bacteria;p__unidentified_Bacteria;c__unidentified_Bacteria;o__unidentified_Bacteria;f__unidentified_Bacteria;g__unidentified_Bacteria;s__Marinimicrobia_bacterium_JGI_0000113-D11 | 1 |
| OTU_944 | k__Bacteria;p__Cyanobacteria;c__unidentified_Cyanobacteria;o__unidentified_Cyanobacteria;f__unidentified_Cyanobacteria;g__unidentified_Cyanobacteria | 1 |
| OTU_88 | k__Bacteria;p__Cyanobacteria;c__unidentified_Cyanobacteria;o__unidentified_Cyanobacteria;f__unidentified_Cyanobacteria;g__unidentified_Cyanobacteria | 0.99 |
| OTU_1809 | k__Bacteria;p__Actinobacteria;c__unidentified_Actinobacteria | 1 |
| OTU_2269 | k__Bacteria;p__Firmicutes;c__Clostridia;o__Clostridiales;f__Lachnospiraceae | 1 |
| OTU_2713 | k__Bacteria;p__Proteobacteria | 0.85 |
| OTU_2843 | k__Bacteria;p__Bacteroidetes;c__Bacteroidia;o__Cytophagales;f__Microscillaceae;g__;s__ | 0.94 |
| OTU_2842 | k__Bacteria;p__Bacteroidetes;c__Bacteroidia;o__Flavobacteriales;f__unidentified_Flavobacteriales;g__Chryseobacterium | 1 |
| OTU_2841 | k__Bacteria;p__Firmicutes;c__Bacilli;o__Bacillales | 1 |
| OTU_2840 | k__Bacteria | 1 |
| OTU_2847 | k__Bacteria;p__Proteobacteria;c__Alphaproteobacteria;o__Rhizobiales;f__Beijerinckiaceae | 0.99 |
| OTU_2846 | k__Bacteria;p__Proteobacteria;c__Gammaproteobacteria | 1 |
| OTU_2845 | k__Bacteria;p__Chloroflexi;c__Dehalococcoidia;o__;f__;g__;s__ | 0.97 |
| OTU_2844 | k__Bacteria;p__Acidobacteria | 1 |
| OTU_1712 | k__Bacteria;p__Chloroflexi;c__Ktedonobacteria;o__Ktedonobacterales | 0.84 |
| OTU_1713 | k__Bacteria;p__Actinobacteria;c__Thermoleophilia;o__Solirubrobacterales;f__;g__;s__ | 0.96 |
| OTU_2849 | k__Bacteria;p__Firmicutes;c__Negativicutes;o__Selenomonadales;f__Veillonellaceae;g__Sporomusa | 1 |
| OTU_2848 | k__Bacteria;p__Planctomycetes;c__Phycisphaerae;o__Phycisphaerales;f__Phycisphaeraceae | 0.85 |
| OTU_1716 | k__Bacteria;p__Actinobacteria;c__Thermoleophilia;o__Gaiellales;f__;g__;s__ | 1 |
| OTU_1717 | k__Bacteria;p__Bacteroidetes;c__Bacteroidia;o__Bacteroidales;f__Bacteroidaceae;g__Bacteroides | 1 |
| OTU_1714 | k__Bacteria;p__Acidobacteria;c__Acidobacteriia | 1 |
| OTU_1715 | k__Bacteria;p__Nitrospirae;c__;o__;f__;g__;s__ | 0.95 |
| OTU_2712 | k__Bacteria;p__Proteobacteria;c__Alphaproteobacteria;o__Rhizobiales;f__unidentified_Rhizobiales | 0.89 |
| OTU_1299 | k__Archaea;p__Thaumarchaeota;c__Nitrososphaeria;o__Nitrosopumilales;f__Nitrosopumilaceae;g__Candidatus_Nitrosopelagicus;s__ | 1 |
| OTU_1298 | k__Bacteria;p__Actinobacteria;c__unidentified_Actinobacteria;o__Frankiales | 0.91 |
| OTU_209 | k__Bacteria;p__Actinobacteria;c__Thermoleophilia;o__Solirubrobacterales;f__Solirubrobacteraceae;g__Conexibacter;s__ | 0.85 |
| OTU_101 | k__Bacteria;p__Firmicutes;c__Bacilli;o__Bacillales;f__Planococcaceae;g__Sporosarcina | 1 |
| OTU_2711 | k__Bacteria;p__Proteobacteria;c__Gammaproteobacteria;o__Oceanospirillales;f__Saccharospirillaceae;g__Oleibacter;s__Oleibacter_marinus | 0.93 |
| OTU_64 | k__Bacteria;p__Proteobacteria;c__Alphaproteobacteria;o__Rhizobiales;f__Xanthobacteraceae | 0.99 |
| OTU_1074 | k__Bacteria;p__Elusimicrobia;c__;o__;f__;g__;s__ | 1 |
| OTU_901 | k__Bacteria;p__Proteobacteria;c__Alphaproteobacteria;o__Rhizobiales;f__Xanthobacteraceae | 0.92 |
| OTU_251 | k__Bacteria;p__Firmicutes;c__Clostridia;o__Clostridiales;f__unidentified_Clostridiales;g__unidentified_Clostridiales;s__Clostridium_bowmanii | 0.99 |
| OTU_903 | k__Bacteria;p__Verrucomicrobia;c__Verrucomicrobiae;o__Chthoniobacterales;f__Chthoniobacteraceae;g__Chthoniobacter;s__ | 0.94 |
| OTU_902 | k__Bacteria;p__Verrucomicrobia;c__Verrucomicrobiae;o__Verrucomicrobiales;f__;g__;s__ | 1 |
| OTU_905 | k__Bacteria;p__Bacteroidetes;c__Bacteroidia;o__Cytophagales;f__Microscillaceae;g__Flexibacter;s__ | 1 |
| OTU_904 | k__Bacteria;p__Proteobacteria;c__Alphaproteobacteria;o__Rhizobiales;f__Beijerinckiaceae;g__Methylobacterium;s__Methylobacterium_soli | 0.9 |
| OTU_1668 | k__Bacteria;p__Proteobacteria;c__Alphaproteobacteria;o__unidentified_Alphaproteobacteria;f__unidentified_Alphaproteobacteria;g__Inquilinus;s__Inquilinus_limosus | 1 |
| OTU_1421 | k__Bacteria;p__Cyanobacteria;c__unidentified_Cyanobacteria;o__Nostocales | 1 |
| OTU_1666 | k__Bacteria;p__Proteobacteria;c__Alphaproteobacteria;o__unidentified_Alphaproteobacteria | 0.89 |
| OTU_908 | k__Bacteria;p__Planctomycetes;c__Planctomycetacia;o__unidentified_Planctomycetacia;f__unidentified_Planctomycetacia;g__Pirellula;s__ | 0.9 |
| OTU_1664 | k__Bacteria;p__Proteobacteria;c__Gammaproteobacteria | 1 |
| OTU_1665 | k__Bacteria;p__Bacteroidetes;c__Bacteroidia;o__Cytophagales;f__Microscillaceae;g__Ohtaekwangia;s__ | 1 |
| OTU_1662 | k__Bacteria;p__Acidobacteria;c__unidentified_Acidobacteria;o__unidentified_Acidobacteria;f__Pyrinomonadaceae;g__;s__ | 1 |
| OTU_1663 | k__Bacteria;p__Proteobacteria;c__Gammaproteobacteria;o__unidentified_Gammaproteobacteria;f__unidentified_Gammaproteobacteria | 0.92 |
| OTU_1660 | k__Bacteria;p__Gracilibacteria;c__unidentified_Gracilibacteria;o__unidentified_Gracilibacteria;f__unidentified_Gracilibacteria;g__unidentified_Gracilibacteria;s__bacterium_RFB_D08 | 0.85 |
| OTU_1661 | k__Bacteria | 1 |
| OTU_1423 | k__Bacteria;p__Bacteroidetes;c__Bacteroidia;o__Chitinophagales;f__Chitinophagaceae;g__Flavisolibacter;s__ | 0.86 |
| OTU_1295 | k__Bacteria;p__Acidobacteria;c__unidentified_Acidobacteria;o__unidentified_Acidobacteria;f__unidentified_Acidobacteria;g__Aridibacter;s__ | 1 |
| OTU_943 | k__Bacteria;p__Deinococcus-Thermus;c__Deinococci;o__Deinococcales;f__Deinococcaceae;g__Deinococcus | 1 |
| OTU_1424 | k__Bacteria;p__Actinobacteria;c__unidentified_Actinobacteria;o__Propionibacteriales;f__Nocardioidaceae;g__Nocardioides;s__Nocardioides_plantarum | 0.97 |
| OTU_1294 | k__Bacteria;p__Proteobacteria;c__Gammaproteobacteria;o__unidentified_Gammaproteobacteria;f__unidentified_Gammaproteobacteria;g__unidentified_Gammaproteobacteria | 0.85 |
| OTU_2717 | k__Bacteria;p__Bacteroidetes;c__Bacteroidia;o__Sphingobacteriales;f__;g__;s__ | 0.99 |
| OTU_1425 | k__Bacteria;p__Firmicutes;c__Clostridia;o__Clostridiales;f__Lachnospiraceae | 1 |
| OTU_1426 | k__Bacteria;p__Acidobacteria;c__unidentified_Acidobacteria;o__unidentified_Acidobacteria;f__unidentified_Acidobacteria;g__Stenotrophobacter;s__ | 0.97 |
| OTU_1427 | k__Bacteria;p__Actinobacteria;c__unidentified_Actinobacteria;o__Micromonosporales;f__Micromonosporaceae;g__Virgisporangium | 0.98 |
| OTU_1428 | k__Bacteria;p__Firmicutes;c__Bacilli;o__Bacillales;f__Staphylococcaceae;g__Jeotgalicoccus;s__ | 0.97 |
| OTU_942 | k__Bacteria;p__Acidobacteria;c__unidentified_Acidobacteria;o__unidentified_Acidobacteria;f__unidentified_Acidobacteria | 0.97 |
| OTU_1429 | k__Bacteria;p__Proteobacteria;c__Gammaproteobacteria;o__Oceanospirillales;f__unidentified_Oceanospirillales;g__Marinobacterium;s__Marinobacterium_marisflavi | 0.99 |
| OTU_2716 | k__Bacteria;p__Proteobacteria;c__Gammaproteobacteria | 1 |
| OTU_61 | k__Bacteria;p__Firmicutes;c__Clostridia;o__Clostridiales;f__Lachnospiraceae;g__Lachnoclostridium | 0.8 |
| OTU_2715 | k__Bacteria;p__Bacteroidetes;c__Bacteroidia;o__Bacteroidales;f__Rikenellaceae;g__;s__ | 0.95 |
| OTU_1259 | k__Bacteria;p__Firmicutes;c__Clostridia;o__Clostridiales;f__Lachnospiraceae;g__unidentified_Lachnospiraceae;s__Clostridium_sp_Clone-47 | 0.85 |
| OTU_1258 | k__Bacteria;p__Proteobacteria;c__Gammaproteobacteria | 0.97 |
| OTU_1257 | k__Bacteria;p__Firmicutes;c__Clostridia;o__Clostridiales;f__Lachnospiraceae | 1 |
| OTU_1256 | k__Bacteria;p__Acidobacteria | 0.89 |
| OTU_1255 | k__Bacteria;p__Actinobacteria;c__unidentified_Actinobacteria;o__Corynebacteriales;f__Nocardiaceae;g__Rhodococcus | 1 |
| OTU_1254 | k__Bacteria;p__Proteobacteria;c__Deltaproteobacteria;o__Oligoflexales;f__Oligoflexaceae;g__;s__ | 0.95 |
| OTU_1253 | k__Bacteria;p__Firmicutes;c__Clostridia;o__Clostridiales;f__Ruminococcaceae | 0.96 |
| OTU_1252 | k__Bacteria;p__Gemmatimonadetes;c__unidentified_Gemmatimonadetes;o__Gemmatimonadales;f__Gemmatimonadaceae;g__Gemmatimonas;s__ | 1 |
| OTU_1251 | k__Bacteria;p__Actinobacteria;c__unidentified_Actinobacteria;o__Micrococcales;f__Microbacteriaceae;g__Rhodoluna;s__ | 0.99 |
| OTU_1250 | k__Bacteria;p__Proteobacteria;c__Alphaproteobacteria;o__Sphingomonadales;f__Sphingomonadaceae;g__Novosphingobium | 0.99 |
| OTU_1099 | k__Bacteria;p__Proteobacteria;c__Gammaproteobacteria;o__unidentified_Gammaproteobacteria;f__unidentified_Gammaproteobacteria;g__Acidibacter | 1 |
| OTU_1098 | k__Bacteria;p__Proteobacteria;c__Alphaproteobacteria;o__Rhizobiales;f__Rhizobiaceae | 0.85 |
| OTU_1095 | k__Bacteria;p__Actinobacteria;c__unidentified_Actinobacteria | 1 |
| OTU_1094 | k__Bacteria;p__Actinobacteria;c__Thermoleophilia;o__Gaiellales;f__Gaiellaceae;g__Gaiella;s__ | 1 |
| OTU_1097 | k__Bacteria;p__Bacteroidetes;c__Bacteroidia;o__Chitinophagales;f__Chitinophagaceae;g__Ferruginibacter | 0.97 |
| OTU_1096 | k__Bacteria;p__Firmicutes;c__Clostridia;o__Clostridiales;f__Lachnospiraceae | 1 |
| OTU_1091 | k__Bacteria;p__Proteobacteria | 0.84 |
| OTU_1090 | k__Bacteria | 0.99 |
| OTU_1093 | k__Bacteria;p__Proteobacteria;c__Deltaproteobacteria;o__Myxococcales;f__Haliangiaceae;g__Haliangium;s__ | 0.95 |
| OTU_1092 | k__Bacteria | 0.99 |
| OTU_130 | k__Bacteria;p__Proteobacteria;c__Gammaproteobacteria;o__Xanthomonadales;f__Xanthomonadaceae | 1 |
| OTU_149 | k__Bacteria;p__Proteobacteria;c__Gammaproteobacteria;o__unidentified_Gammaproteobacteria;f__unidentified_Gammaproteobacteria;g__unidentified_Gammaproteobacteria;s__gamma_proteobacterium_SCGC_AAA076-P13 | 1 |
| OTU_1895 | k__Bacteria;p__Proteobacteria;c__Alphaproteobacteria;o__unidentified_Alphaproteobacteria;f__Acetobacteraceae | 1 |
| OTU_1894 | k__Bacteria;p__Elusimicrobia;c__;o__;f__;g__;s__ | 1 |
| OTU_1897 | k__Bacteria;p__Acidobacteria;c__Acidobacteriia;o__Acidobacteriales;f__unidentified_Acidobacteriales;g__Granulicella | 0.92 |
| OTU_1896 | k__Bacteria;p__Acidobacteria;c__;o__;f__;g__;s__ | 0.91 |
| OTU_1891 | k__Bacteria;p__Firmicutes;c__Clostridia;o__Clostridiales;f__Lachnospiraceae | 1 |
| OTU_1890 | k__Bacteria;p__Proteobacteria;c__Deltaproteobacteria;o__Syntrophobacterales;f__Syntrophaceae;g__;s__ | 0.97 |
| OTU_1893 | k__Bacteria;p__Proteobacteria;c__Alphaproteobacteria;o__Rhodobacterales;f__Rhodobacteraceae | 1 |
| OTU_1892 | k__Bacteria;p__Acidobacteria;c__unidentified_Acidobacteria;o__unidentified_Acidobacteria;f__unidentified_Acidobacteria | 0.92 |
| OTU_1899 | k__Bacteria;p__Firmicutes | 0.92 |
| OTU_1898 | k__Bacteria;p__Proteobacteria;c__Gammaproteobacteria;o__unidentified_Gammaproteobacteria;f__Neisseriaceae;g__Neisseria;s__Neisseria_oralis | 0.94 |
| OTU_131 | k__Bacteria;p__Proteobacteria;c__Alphaproteobacteria;o__Rickettsiales;f__unidentified_Rickettsiales;g__unidentified_Rickettsiales;s__ | 1 |
| OTU_2873 | k__Bacteria;p__Actinobacteria;c__Acidimicrobiia | 1 |
| OTU_1381 | k__Bacteria;p__Acidobacteria;c__Acidobacteriia;o__Solibacterales;f__unidentified_Solibacterales;g__Bryobacter;s__ | 1 |
| OTU_1380 | k__Bacteria;p__Proteobacteria;c__Deltaproteobacteria;o__Desulfobacterales;f__Desulfobulbaceae | 1 |
| OTU_1383 | k__Bacteria;p__Proteobacteria;c__Gammaproteobacteria;o__Aeromonadales;f__Succinivibrionaceae;g__Succinivibrio;s__ | 0.82 |
| OTU_1382 | k__Bacteria | 1 |
| OTU_1385 | k__Bacteria;p__Bacteroidetes;c__Bacteroidia;o__Chitinophagales;f__Chitinophagaceae;g__Sediminibacterium;s__ | 1 |
| OTU_1384 | k__Bacteria;p__Proteobacteria;c__Deltaproteobacteria;o__Myxococcales | 1 |
| OTU_1387 | k__Bacteria;p__Bacteroidetes;c__Bacteroidia;o__Flavobacteriales;f__Flavobacteriaceae;g__;s__ | 1 |
| OTU_1386 | k__Bacteria;p__Actinobacteria;c__unidentified_Actinobacteria;o__Frankiales;f__Sporichthyaceae;g__;s__ | 0.99 |
| OTU_1389 | k__Bacteria;p__Actinobacteria;c__Thermoleophilia | 0.8 |
| OTU_1388 | k__Bacteria;p__Proteobacteria;c__Alphaproteobacteria;o__Sphingomonadales;f__Sphingomonadaceae;g__Novosphingobium | 0.94 |
| OTU_148 | k__Bacteria;p__Proteobacteria;c__Gammaproteobacteria;o__Pseudomonadales;f__Pseudomonadaceae;g__Pseudomonas;s__Pseudomonas_psychrotolerans | 1 |
| OTU_2384 | k__Bacteria;p__Bacteroidetes;c__Bacteroidia;o__Bacteroidales;f__Prevotellaceae;g__unidentified_Prevotellaceae | 0.85 |
| OTU_2385 | k__Bacteria;p__Planctomycetes;c__Planctomycetacia;o__unidentified_Planctomycetacia;f__unidentified_Planctomycetacia;g__Pirellula;s__ | 0.85 |
| OTU_2386 | k__Bacteria;p__Actinobacteria;c__unidentified_Actinobacteria;o__Propionibacteriales;f__Propionibacteriaceae | 1 |
| OTU_1878 | k__Bacteria;p__Chloroflexi;c__unidentified_Chloroflexi;o__unidentified_Chloroflexi;f__unidentified_Chloroflexi;g__unidentified_Chloroflexi;s__Chloroflexi_bacterium_OLB14 | 0.93 |
| OTU_2380 | k__Bacteria;p__Proteobacteria;c__Alphaproteobacteria | 0.96 |
| OTU_2381 | k__Bacteria;p__Proteobacteria;c__Deltaproteobacteria;o__Syntrophobacterales;f__Syntrophaceae;g__Smithella;s__ | 0.99 |
| OTU_2382 | k__Bacteria;p__Bacteroidetes;c__Bacteroidia;o__Bacteroidales;f__Rikenellaceae;g__Alistipes;s__ | 1 |
| OTU_2383 | k__Bacteria;p__Verrucomicrobia;c__Verrucomicrobiae;o__Verrucomicrobiales;f__Rubritaleaceae;g__Luteolibacter;s__Verrucomicrobia_bacterium_SCGC_AAA027-I19 | 1 |
| OTU_1873 | k__Bacteria;p__Proteobacteria;c__Gammaproteobacteria | 0.99 |
| OTU_1872 | k__Bacteria;p__Proteobacteria;c__Deltaproteobacteria;o__Desulfarculales;f__Desulfarculaceae;g__;s__ | 0.88 |
| OTU_1871 | k__Bacteria;p__Planctomycetes;c__Phycisphaerae | 0.91 |
| OTU_1870 | k__Bacteria;p__Proteobacteria;c__Deltaproteobacteria;o__Desulfarculales;f__Desulfarculaceae | 0.84 |
| OTU_2388 | k__Bacteria;p__Bacteroidetes;c__Bacteroidia;o__Bacteroidales;f__Muribaculaceae;g__;s__ | 0.81 |
| OTU_2389 | k__Bacteria;p__Firmicutes;c__Clostridia;o__Clostridiales;f__Ruminococcaceae | 0.99 |
| OTU_1875 | k__Bacteria;p__Proteobacteria;c__Alphaproteobacteria;o__Rhizobiales;f__Rhizobiaceae;g__Fulvimarina;s__Fulvimarina_manganoxydans | 1 |
| OTU_1874 | k__Bacteria;p__Proteobacteria;c__Gammaproteobacteria;o__unidentified_Gammaproteobacteria | 1 |
| OTU_2039 | k__Bacteria;p__Rokubacteria;c__unidentified_Rokubacteria;o__unidentified_Rokubacteria;f__unidentified_Rokubacteria;g__unidentified_Rokubacteria;s__bacterium_WX65 | 0.99 |
| OTU_2516 | k__Bacteria;p__Proteobacteria;c__Deltaproteobacteria;o__Bdellovibrionales;f__Bdellovibrionaceae;g__;s__ | 0.97 |
| OTU_2472 | k__Bacteria;p__Bacteroidetes;c__Bacteroidia;o__Flavobacteriales;f__Flavobacteriaceae | 1 |
| OTU_2473 | k__Bacteria;p__Actinobacteria;c__Acidimicrobiia;o__Actinomarinales;f__;g__;s__ | 1 |
| OTU_2470 | k__Bacteria;p__Proteobacteria;c__Alphaproteobacteria;o__Caulobacterales;f__Caulobacteraceae;g__Brevundimonas;s__Brevundimonas_terrae | 0.95 |
| OTU_2471 | k__Bacteria | 0.98 |
| OTU_2476 | k__Bacteria;p__Proteobacteria;c__Gammaproteobacteria;o__unidentified_Gammaproteobacteria;f__Nitrosomonadaceae | 0.96 |
| OTU_2477 | k__Bacteria;p__Proteobacteria;c__Deltaproteobacteria;o__Oligoflexales;f__Oligoflexaceae;g__Silvanigrella | 0.87 |
| OTU_2474 | k__Bacteria;p__Firmicutes;c__Clostridia;o__Clostridiales;f__Lachnospiraceae | 1 |
| OTU_2475 | k__Bacteria;p__Actinobacteria;c__Acidimicrobiia | 0.98 |
| OTU_2478 | k__Bacteria;p__Proteobacteria;c__Alphaproteobacteria;o__unidentified_Alphaproteobacteria;f__unidentified_Alphaproteobacteria;g__Dongia | 1 |
| OTU_2479 | k__Bacteria;p__Firmicutes;c__Erysipelotrichia;o__Erysipelotrichales;f__Erysipelotrichaceae;g__Coprobacillus | 0.99 |
| OTU_2270 | k__Bacteria;p__Proteobacteria;c__Alphaproteobacteria;o__unidentified_Alphaproteobacteria;f__Acetobacteraceae | 1 |
| OTU_2271 | k__Bacteria;p__Proteobacteria;c__Deltaproteobacteria;o__Desulfovibrionales;f__Desulfovibrionaceae;g__Desulfovibrio | 0.99 |
| OTU_2272 | k__Bacteria;p__Proteobacteria;c__Gammaproteobacteria;o__Thiotrichales;f__Thiotrichaceae;g__Thiothrix;s__Thiothrix_sp_FBR0112 | 0.92 |
| OTU_2273 | k__Bacteria;p__Actinobacteria;c__Acidimicrobiia;o__;f__;g__;s__ | 0.99 |
| OTU_2274 | k__Bacteria;p__Planctomycetes;c__Planctomycetacia;o__unidentified_Planctomycetacia;f__Gemmataceae;g__;s__ | 1 |
| OTU_2275 | k__Bacteria;p__Proteobacteria;c__Gammaproteobacteria;o__unidentified_Gammaproteobacteria;f__Woeseiaceae;g__;s__ | 0.87 |
| OTU_2276 | k__Bacteria;p__Chloroflexi;c__Ktedonobacteria;o__Ktedonobacterales;f__Ktedonobacteraceae;g__;s__ | 0.97 |
| OTU_2277 | k__Bacteria;p__Tenericutes;c__Mollicutes;o__Anaeroplasmatales;f__Anaeroplasmataceae;g__Anaeroplasma;s__ | 1 |
| OTU_2278 | k__Bacteria;p__Firmicutes;c__Clostridia;o__Clostridiales;f__Ruminococcaceae;g__;s__ | 0.87 |
| OTU_2279 | k__Bacteria;p__Planctomycetes;c__Planctomycetacia;o__Planctomycetales;f__unidentified_Planctomycetales;g__Planctomicrobium;s__ | 1 |
| OTU_2498 | k__Bacteria;p__Chloroflexi;c__Anaerolineae;o__Anaerolineales;f__Anaerolineaceae | 1 |
| OTU_2499 | k__Bacteria;p__Proteobacteria;c__Gammaproteobacteria;o__unidentified_Gammaproteobacteria;f__Neisseriaceae | 1 |
| OTU_2490 | k__Bacteria;p__Chlamydiae;c__unidentified_Chlamydiae;o__Chlamydiales | 1 |
| OTU_2491 | k__Bacteria;p__Verrucomicrobia;c__Verrucomicrobiae;o__Verrucomicrobiales;f__Verrucomicrobiaceae;g__;s__ | 0.99 |
| OTU_2492 | k__Bacteria;p__Actinobacteria;c__Thermoleophilia;o__Gaiellales;f__;g__;s__ | 0.96 |
| OTU_2493 | k__Bacteria;p__Firmicutes;c__Clostridia;o__Clostridiales;f__Lachnospiraceae;g__unidentified_Lachnospiraceae;s__[Ruminococcus]_gnavus | 0.98 |
| OTU_2494 | k__Bacteria;p__Cyanobacteria;c__unidentified_Cyanobacteria;o__Nostocales;f__Nostocaceae;g__unidentified_Nostocaceae | 1 |
| OTU_2495 | k__Bacteria;p__Proteobacteria;c__Gammaproteobacteria;o__unidentified_Gammaproteobacteria;f__unidentified_Gammaproteobacteria;g__Candidatus_Ovatusbacter;s__ | 1 |
| OTU_2496 | k__Bacteria;p__Bacteroidetes;c__Bacteroidia;o__Bacteroidales | 0.95 |
| OTU_2497 | k__Bacteria;p__Proteobacteria;c__Gammaproteobacteria | 1 |
| OTU_821 | k__Bacteria;p__Bacteroidetes;c__Bacteroidia;o__Bacteroidales;f__Rikenellaceae;g__Anaerocella;s__ | 1 |
| OTU_3019 | k__Bacteria | 1 |
| OTU_3018 | k__Bacteria;p__Bacteroidetes;c__Bacteroidia;o__Bacteroidales;f__Tannerellaceae;g__Parabacteroides;s__Porphyromonadaceae_bacterium_DJF_B175 | 1 |
| OTU_3017 | k__Bacteria;p__Proteobacteria;c__Alphaproteobacteria | 1 |
| OTU_3016 | k__Bacteria;p__Acidobacteria;c__Acidobacteriia;o__;f__;g__;s__ | 1 |
| OTU_3015 | k__Bacteria;p__Actinobacteria;c__Acidimicrobiia;o__;f__;g__;s__ | 0.99 |
| OTU_3014 | k__Bacteria;p__Firmicutes;c__Clostridia;o__Clostridiales;f__unidentified_Clostridiales | 0.87 |
| OTU_3013 | k__Bacteria;p__Firmicutes;c__Clostridia;o__Clostridiales;f__Ruminococcaceae | 0.99 |
| OTU_3012 | k__Bacteria;p__Planctomycetes;c__Planctomycetacia;o__Planctomycetales;f__unidentified_Planctomycetales;g__unidentified_Planctomycetales;s__Planctomyces_sp_SCGC_AG-212-M04 | 1 |
| OTU_3011 | k__Bacteria;p__Acidobacteria;c__Acidobacteriia;o__Acidobacteriales;f__unidentified_Acidobacteriales;g__Edaphobacter;s__ | 0.8 |
| OTU_3010 | k__Bacteria;p__Proteobacteria;c__Deltaproteobacteria;o__Myxococcales;f__Polyangiaceae;g__Pajaroellobacter;s__ | 0.89 |
| OTU_2014 | k__Bacteria;p__Bacteroidetes;c__Bacteroidia;o__Chitinophagales;f__Chitinophagaceae;g__Flavisolibacter;s__Flavisolibacter_ginsengisoli | 0.87 |
| OTU_2015 | k__Bacteria;p__Actinobacteria;c__Acidimicrobiia;o__;f__;g__;s__ | 0.89 |
| OTU_2016 | k__Bacteria;p__Melainabacteria | 0.99 |
| OTU_2017 | k__Bacteria;p__Proteobacteria;c__Alphaproteobacteria;o__Rhizobiales | 0.86 |
| OTU_2010 | k__Bacteria;p__Proteobacteria;c__Gammaproteobacteria;o__unidentified_Gammaproteobacteria;f__Burkholderiaceae;g__Polynucleobacter;s__Polynucleobacter_asymbioticus | 0.95 |
| OTU_2011 | k__Bacteria;p__Firmicutes;c__Clostridia;o__Clostridiales;f__Ruminococcaceae;g__Ruminiclostridium;s__ | 1 |
| OTU_2012 | k__Bacteria;p__Bacteroidetes;c__Bacteroidia;o__Sphingobacteriales;f__;g__;s__ | 0.96 |
| OTU_2013 | k__Bacteria;p__Proteobacteria;c__Alphaproteobacteria;o__Rhodobacterales;f__Rhodobacteraceae;g__Loktanella | 0.82 |
| OTU_2018 | k__Bacteria;p__Firmicutes;c__Clostridia;o__Clostridiales;f__Ruminococcaceae;g__unidentified_Ruminococcaceae | 0.85 |
| OTU_2019 | k__Bacteria;p__Firmicutes;c__Clostridia;o__Clostridiales;f__Lachnospiraceae;g__Blautia | 0.99 |
| OTU_1525 | k__Bacteria;p__Proteobacteria;c__Alphaproteobacteria;o__Rhodospirillales;f__unidentified_Rhodospirillales;g__Thalassospira;s__ | 0.96 |
| OTU_1524 | k__Bacteria;p__Chloroflexi;c__Anaerolineae;o__;f__;g__;s__ | 0.93 |
| OTU_648 | k__Bacteria;p__Tenericutes;c__Mollicutes;o__Mycoplasmatales;f__Mycoplasmataceae;g__Mycoplasma;s__Mycoplasma_moatsii | 0.91 |
| OTU_649 | k__Bacteria;p__Proteobacteria;c__Gammaproteobacteria;o__Pseudomonadales;f__Moraxellaceae;g__Acinetobacter | 1 |
| OTU_138 | k__Bacteria;p__Proteobacteria;c__Alphaproteobacteria;o__Sphingomonadales;f__Sphingomonadaceae;g__Sphingopyxis;s__Sphingopyxis_terrae | 0.8 |
| OTU_139 | k__Bacteria | 0.98 |
| OTU_2728 | k__Bacteria;p__Firmicutes;c__Clostridia;o__Clostridiales;f__Ruminococcaceae;g__Fastidiosipila;s__ | 1 |
| OTU_2729 | k__Bacteria;p__Firmicutes;c__Clostridia;o__Clostridiales;f__Ruminococcaceae | 0.97 |
| OTU_642 | k__Bacteria;p__Proteobacteria;c__Gammaproteobacteria;o__unidentified_Gammaproteobacteria;f__unidentified_Gammaproteobacteria;g__unidentified_Gammaproteobacteria | 1 |
| OTU_643 | k__Bacteria;p__Firmicutes;c__Bacilli;o__Bacillales;f__Paenibacillaceae;g__Paenibacillus;s__Paenibacillus_anaericanus | 0.95 |
| OTU_2724 | k__Bacteria;p__Gemmatimonadetes;c__;o__;f__;g__;s__ | 0.98 |
| OTU_2725 | k__Bacteria;p__Proteobacteria;c__Alphaproteobacteria;o__Sphingomonadales;f__Sphingomonadaceae | 1 |
| OTU_2722 | k__Bacteria;p__Proteobacteria;c__Alphaproteobacteria;o__Rhizobiales;f__Rhizobiaceae;g__unidentified_Rhizobiaceae | 1 |
| OTU_2723 | k__Bacteria;p__Actinobacteria;c__unidentified_Actinobacteria;o__Streptomycetales;f__Streptomycetaceae | 1 |
| OTU_2720 | k__Bacteria;p__Planctomycetes;c__Planctomycetacia;o__unidentified_Planctomycetacia;f__unidentified_Planctomycetacia | 1 |
| OTU_2721 | k__Bacteria;p__Chloroflexi;c__Anaerolineae;o__Anaerolineales;f__Anaerolineaceae;g__;s__ | 1 |
| OTU_404 | k__Bacteria;p__Firmicutes;c__Clostridia;o__Clostridiales;f__Lachnospiraceae | 1 |
| OTU_405 | k__Bacteria;p__Chloroflexi;c__Anaerolineae | 0.97 |
| OTU_626 | k__Bacteria;p__Firmicutes;c__Clostridia;o__Clostridiales;f__Ruminococcaceae | 1 |
| OTU_406 | k__Bacteria;p__Bacteroidetes;c__Bacteroidia;o__Flavobacteriales;f__Flavobacteriaceae;g__Flavobacterium;s__Flavobacterium_hercynium | 0.98 |
| OTU_2128 | k__Bacteria;p__Deinococcus-Thermus;c__Deinococci;o__Deinococcales;f__Trueperaceae;g__Truepera;s__ | 0.99 |
| OTU_2129 | k__Bacteria;p__Synergistetes;c__Synergistia;o__Synergistales;f__Synergistaceae;g__Fretibacterium | 1 |
| OTU_2658 | k__Bacteria;p__Bacteroidetes;c__Bacteroidia;o__Flavobacteriales;f__unidentified_Flavobacteriales;g__Bergeyella;s__Bergeyella_zoohelcum | 1 |
| OTU_2659 | k__Bacteria;p__Proteobacteria;c__Gammaproteobacteria;o__unidentified_Gammaproteobacteria;f__unidentified_Gammaproteobacteria;g__Steroidobacter;s__ | 1 |
| OTU_2120 | k__Bacteria;p__Planctomycetes;c__Planctomycetacia;o__unidentified_Planctomycetacia;f__Gemmataceae;g__;s__ | 0.98 |
| OTU_2653 | k__Bacteria;p__Actinobacteria;c__Acidimicrobiia;o__;f__;g__;s__ | 0.91 |
| OTU_2122 | k__Bacteria;p__Verrucomicrobia;c__Verrucomicrobiae;o__Verrucomicrobiales | 0.85 |
| OTU_2123 | k__Bacteria;p__Acidobacteria;c__Acidobacteriia;o__Solibacterales;f__unidentified_Solibacterales;g__Candidatus_Solibacter;s__ | 0.95 |
| OTU_2124 | k__Bacteria;p__Actinobacteria;c__unidentified_Actinobacteria;o__Micrococcales;f__Brevibacteriaceae;g__Brevibacterium | 1 |
| OTU_2125 | k__Bacteria;p__Chloroflexi | 1 |
| OTU_2126 | k__Bacteria;p__Bacteroidetes;c__Bacteroidia;o__Flavobacteriales;f__Flavobacteriaceae;g__unidentified_Flavobacteriaceae;s__Flavobacteria_bacterium_MS024-3C | 0.86 |
| OTU_401 | k__Bacteria;p__Proteobacteria;c__Deltaproteobacteria;o__;f__;g__;s__ | 0.81 |
| OTU_736 | k__Bacteria;p__Chloroflexi;c__Ktedonobacteria;o__Ktedonobacterales;f__;g__;s__ | 0.93 |
| OTU_737 | k__Bacteria;p__unidentified_Bacteria;c__unidentified_Bacteria;o__Campylobacterales;f__unidentified_Campylobacterales;g__Sulfurimonas;s__Sulfurimonas_sp_HDS01 | 0.82 |
| OTU_734 | k__Bacteria;p__Proteobacteria;c__Deltaproteobacteria;o__Desulfuromonadales | 1 |
| OTU_735 | k__Bacteria;p__Bacteroidetes;c__Bacteroidia;o__Sphingobacteriales;f__Sphingobacteriaceae;g__Sphingobacterium | 1 |
| OTU_732 | k__Bacteria;p__Firmicutes;c__Clostridia;o__Clostridiales;f__Lachnospiraceae;g__Blautia;s__Ruminococcus_sp_Marseille-P328 | 0.98 |
| OTU_733 | k__Bacteria;p__Bacteroidetes;c__Bacteroidia;o__Chitinophagales;f__Chitinophagaceae;g__unidentified_Chitinophagaceae;s__Terrimonas_sp_YJ03 | 0.96 |
| OTU_730 | k__Bacteria;p__Verrucomicrobia;c__Verrucomicrobiae | 1 |
| OTU_731 | k__Bacteria;p__Firmicutes;c__Bacilli;o__Bacillales;f__Paenibacillaceae;g__Cohnella | 0.97 |
| OTU_1411 | k__Bacteria;p__Firmicutes;c__Bacilli;o__Bacillales;f__Paenibacillaceae;g__Paenibacillus | 0.98 |
| OTU_1410 | k__Bacteria;p__Bacteroidetes;c__Bacteroidia;o__Cytophagales;f__Microscillaceae;g__;s__ | 1 |
| OTU_1413 | k__Bacteria;p__Cyanobacteria;c__unidentified_Cyanobacteria;o__Nostocales;f__unidentified_Nostocales;g__unidentified_Nostocales;s__Chroococcus_sp_JJCV | 0.92 |
| OTU_403 | k__Bacteria;p__Proteobacteria;c__Gammaproteobacteria;o__Pseudomonadales;f__Moraxellaceae;g__Moraxella;s__Moraxella_osloensis | 0.8 |
| OTU_1415 | k__Bacteria | 0.99 |
| OTU_1414 | k__Bacteria;p__Proteobacteria;c__Deltaproteobacteria;o__Myxococcales | 1 |
| OTU_738 | k__Bacteria;p__Proteobacteria;c__Alphaproteobacteria;o__Sneathiellales;f__Sneathiellaceae;g__Ferrovibrio;s__ | 0.83 |
| OTU_1416 | k__Bacteria;p__Acidobacteria;c__unidentified_Acidobacteria;o__unidentified_Acidobacteria;f__unidentified_Acidobacteria;g__unidentified_Acidobacteria;s__Acidobacteria_bacterium_SCN_69-37 | 0.96 |
| OTU_228 | k__Bacteria;p__Proteobacteria;c__Alphaproteobacteria;o__Rhodobacterales;f__Rhodobacteraceae;g__Paracoccus;s__Paracoccus_carotinifaciens | 0.84 |
| OTU_229 | k__Bacteria;p__Proteobacteria;c__Gammaproteobacteria;o__Oceanospirillales;f__Alcanivoracaceae;g__Alcanivorax | 1 |
| OTU_220 | k__Bacteria;p__Proteobacteria;c__Alphaproteobacteria;o__Rhizobiales;f__Rhizobiaceae;g__Neorhizobium;s__Neorhizobium_galegae | 0.98 |
| OTU_221 | k__Bacteria;p__Acidobacteria;c__Acidobacteriia;o__Solibacterales;f__unidentified_Solibacterales;g__Bryobacter;s__ | 1 |
| OTU_222 | k__Bacteria;p__Actinobacteria;c__unidentified_Actinobacteria;o__Micrococcales;f__Microbacteriaceae;g__Microbacterium;s__Microbacterium_endophyticum | 0.88 |
| OTU_223 | k__Bacteria;p__Proteobacteria;c__Alphaproteobacteria;o__Rhodobacterales;f__Rhodobacteraceae;g__Rhodobacter | 0.87 |
| OTU_224 | k__Bacteria;p__Bacteroidetes;c__Bacteroidia;o__Bacteroidales;f__Tannerellaceae;g__Parabacteroides | 1 |
| OTU_225 | k__Bacteria;p__Proteobacteria;c__Alphaproteobacteria;o__Rhizobiales;f__Rhizobiaceae | 1 |
| OTU_226 | k__Bacteria;p__Proteobacteria;c__Deltaproteobacteria;o__Oligoflexales;f__Oligoflexaceae;g__Oligoflexus;s__Oligoflexus_tunisiensis | 0.82 |
| OTU_227 | k__Bacteria;p__Firmicutes;c__Negativicutes;o__Selenomonadales;f__Veillonellaceae;g__Megamonas;s__ | 0.97 |
| OTU_959 | k__Bacteria;p__Actinobacteria;c__unidentified_Actinobacteria;o__Streptosporangiales;f__Streptosporangiaceae;g__Nonomuraea | 1 |
| OTU_408 | k__Bacteria;p__Bacteroidetes;c__Bacteroidia;o__Flavobacteriales;f__Crocinitomicaceae;g__Fluviicola;s__ | 1 |
| OTU_2743 | k__Bacteria;p__Planctomycetes;c__Planctomycetacia;o__;f__;g__;s__ | 1 |
| OTU_2902 | k__Bacteria;p__Actinobacteria;c__unidentified_Actinobacteria | 1 |
| OTU_409 | k__Bacteria;p__Firmicutes;c__Clostridia;o__Clostridiales;f__unidentified_Clostridiales;g__unidentified_Clostridiales;s__Clostridium_beijerinckii | 0.98 |
| OTU_2623 | k__Bacteria;p__Proteobacteria;c__Gammaproteobacteria;o__Cellvibrionales;f__Halieaceae | 1 |
| OTU_1633 | k__Bacteria;p__Latescibacteria;c__;o__;f__;g__;s__ | 0.98 |
| OTU_2622 | k__Bacteria;p__Bacteroidetes;c__Bacteroidia;o__Chitinophagales;f__Chitinophagaceae | 1 |
| OTU_1632 | k__Bacteria;p__Actinobacteria;c__Coriobacteriia;o__Coriobacteriales;f__Atopobiaceae;g__;s__ | 0.99 |
| OTU_2621 | k__Bacteria;p__Actinobacteria;c__unidentified_Actinobacteria;o__Micrococcales;f__Micrococcaceae;g__Rothia | 1 |
| OTU_1862 | k__Bacteria;p__Acidobacteria;c__Acidobacteriia;o__;f__;g__;s__ | 1 |
| OTU_2620 | k__Bacteria;p__Actinobacteria;c__Acidimicrobiia;o__Actinomarinales | 1 |
| OTU_501 | k__Bacteria;p__Firmicutes;c__Bacilli;o__Bacillales;f__Bacillaceae;g__Bacillus;s__Bacillus_sporothermodurans | 0.94 |
| OTU_1736 | k__Bacteria;p__Proteobacteria;c__Gammaproteobacteria;o__unidentified_Gammaproteobacteria;f__Rhodocyclaceae;g__Dechloromonas;s__ | 0.87 |
| OTU_2626 | k__Bacteria;p__Bacteroidetes;c__Bacteroidia;o__Bacteroidales;f__Paludibacteraceae;g__Paludibacter;s__ | 0.99 |
| OTU_2876 | k__Bacteria;p__Firmicutes;c__Clostridia;o__Clostridiales;f__Ruminococcaceae | 0.9 |
| OTU_2877 | k__Bacteria;p__Firmicutes;c__Clostridia;o__Clostridiales;f__Lachnospiraceae;g__unidentified_Lachnospiraceae | 1 |
| OTU_2874 | k__Bacteria;p__Firmicutes;c__Clostridia;o__Clostridiales;f__Lachnospiraceae | 1 |
| OTU_2875 | k__Bacteria;p__Bacteroidetes;c__Bacteroidia;o__Bacteroidales;f__Rikenellaceae;g__;s__ | 0.84 |
| OTU_2872 | k__Bacteria;p__Actinobacteria;c__unidentified_Actinobacteria;o__Micrococcales;f__Micrococcaceae | 1 |
| OTU_2625 | k__Bacteria;p__Firmicutes;c__Bacilli;o__Lactobacillales;f__Streptococcaceae;g__Streptococcus | 1 |
| OTU_2870 | k__Bacteria;p__Proteobacteria;c__Gammaproteobacteria;o__Enterobacteriales;f__Enterobacteriaceae | 0.93 |
| OTU_2871 | k__Bacteria;p__Proteobacteria;c__Alphaproteobacteria;o__unidentified_Alphaproteobacteria | 0.9 |
| OTU_1705 | k__Bacteria;p__Proteobacteria;c__Alphaproteobacteria;o__Rhodobacterales;f__Rhodobacteraceae | 1 |
| OTU_1704 | k__Bacteria;p__Actinobacteria;c__Thermoleophilia;o__Gaiellales;f__Gaiellaceae;g__Gaiella;s__ | 0.91 |
| OTU_1707 | k__Bacteria;p__Actinobacteria;c__unidentified_Actinobacteria;o__Propionibacteriales;f__Nocardioidaceae;g__Nocardioides | 1 |
| OTU_2624 | k__Bacteria;p__Verrucomicrobia;c__Verrucomicrobiae;o__Opitutales;f__Opitutaceae;g__Opitutus;s__ | 0.99 |
| OTU_1701 | k__Bacteria;p__Actinobacteria;c__Coriobacteriia;o__Coriobacteriales;f__Coriobacteriaceae;g__Collinsella;s__Collinsella_tanakaei | 0.85 |
| OTU_1700 | k__Bacteria;p__Bacteroidetes;c__Bacteroidia;o__Bacteroidales | 1 |
| OTU_2878 | k__Bacteria;p__Chloroflexi;c__Anaerolineae;o__;f__;g__;s__ | 0.9 |
| OTU_1702 | k__Bacteria;p__Chloroflexi;c__Anaerolineae;o__;f__;g__;s__ | 0.87 |
| OTU_142 | k__Bacteria;p__Bacteroidetes;c__Bacteroidia;o__Bacteroidales;f__Bacteroidaceae;g__Bacteroides | 1 |
| OTU_1808 | k__Bacteria;p__Actinobacteria;c__Coriobacteriia;o__Coriobacteriales;f__Eggerthellaceae;g__Enterorhabdus;s__ | 1 |
| OTU_2650 | k__Bacteria;p__Planctomycetes;c__;o__;f__;g__;s__ | 0.92 |
| OTU_1967 | k__Bacteria;p__Proteobacteria;c__Alphaproteobacteria;o__Rhizobiales;f__Hyphomicrobiaceae;g__Hyphomicrobium | 0.99 |
| OTU_1738 | k__Bacteria;p__Proteobacteria;c__Alphaproteobacteria | 1 |
| OTU_1739 | k__Bacteria;p__Firmicutes;c__Clostridia;o__Clostridiales;f__Christensenellaceae;g__;s__ | 1 |
| OTU_2651 | k__Bacteria;p__Bacteroidetes;c__Bacteroidia;o__Chitinophagales;f__Chitinophagaceae | 1 |
| OTU_76 | k__Bacteria;p__Proteobacteria;c__Alphaproteobacteria;o__Rhizobiales;f__Beijerinckiaceae;g__Bosea;s__ | 0.94 |
| OTU_1671 | k__Bacteria;p__Firmicutes;c__Erysipelotrichia;o__Erysipelotrichales;f__Erysipelotrichaceae | 0.94 |
| OTU_1670 | k__Bacteria;p__Proteobacteria;c__Gammaproteobacteria;o__unidentified_Gammaproteobacteria;f__Burkholderiaceae | 1 |
| OTU_1673 | k__Bacteria;p__Planctomycetes;c__Planctomycetacia;o__unidentified_Planctomycetacia;f__unidentified_Planctomycetacia;g__Pirellula;s__ | 1 |
| OTU_1672 | k__Bacteria;p__Actinobacteria;c__Thermoleophilia;o__Gaiellales;f__Gaiellaceae;g__Gaiella;s__ | 1 |
| OTU_1675 | k__Bacteria;p__Actinobacteria;c__unidentified_Actinobacteria;o__Micrococcales;f__Microbacteriaceae | 0.91 |
| OTU_1674 | k__Bacteria;p__Planctomycetes;c__Phycisphaerae;o__Phycisphaerales;f__Phycisphaeraceae;g__;s__ | 1 |
| OTU_918 | k__Bacteria;p__Proteobacteria;c__Alphaproteobacteria;o__Rhizobiales;f__Xanthobacteraceae;g__;s__ | 0.88 |
| OTU_919 | k__Bacteria;p__Verrucomicrobia;c__Verrucomicrobiae;o__Chthoniobacterales;f__unidentified_Chthoniobacterales;g__Candidatus_Xiphinematobacter;s__ | 1 |
| OTU_916 | k__Bacteria;p__Proteobacteria;c__Gammaproteobacteria;o__Cellvibrionales;f__Microbulbiferaceae;g__Microbulbifer | 1 |
| OTU_917 | k__Bacteria;p__Planctomycetes;c__Planctomycetacia;o__unidentified_Planctomycetacia;f__Gemmataceae;g__;s__ | 1 |
| OTU_914 | k__Bacteria;p__Bacteroidetes;c__Bacteroidia;o__Bacteroidales;f__Bacteroidaceae;g__Bacteroides | 1 |
| OTU_915 | k__Bacteria;p__Acidobacteria;c__Acidobacteriia;o__Solibacterales;f__unidentified_Solibacterales | 0.85 |
| OTU_912 | k__Bacteria;p__Proteobacteria;c__Alphaproteobacteria;o__Rickettsiales;f__unidentified_Rickettsiales;g__unidentified_Rickettsiales;s__ | 0.94 |
| OTU_913 | k__Bacteria;p__Proteobacteria;c__Gammaproteobacteria;o__Alteromonadales;f__unidentified_Alteromonadales;g__Marinobacter | 1 |
| OTU_910 | k__Bacteria;p__Acidobacteria;c__Acidobacteriia;o__Acidobacteriales;f__unidentified_Acidobacteriales | 1 |
| OTU_911 | k__Bacteria;p__Actinobacteria;c__unidentified_Actinobacteria;o__Micrococcales;f__Brevibacteriaceae;g__Brevibacterium;s__Brevibacterium_epidermidis | 0.85 |
| OTU_77 | k__Bacteria;p__unidentified_Bacteria;c__unidentified_Bacteria;o__Campylobacterales;f__Helicobacteraceae;g__Helicobacter;s__Helicobacter_ganmani | 0.92 |
| OTU_2638 | k__Bacteria;p__Proteobacteria;c__Alphaproteobacteria;o__Rhizobiales;f__Beijerinckiaceae;g__Microvirga;s__ | 0.87 |
| OTU_74 | k__Bacteria;p__Proteobacteria;c__Gammaproteobacteria;o__Pseudomonadales;f__Moraxellaceae;g__Enhydrobacter;s__Moraxella_osloensis | 1 |
| OTU_1618 | k__Bacteria;p__Firmicutes;c__Bacilli;o__Bacillales;f__Bacillaceae;g__Bacillus | 1 |
| OTU_2639 | k__Bacteria;p__Actinobacteria;c__Rubrobacteria;o__Rubrobacterales;f__unidentified_Rubrobacterales;g__Rubrobacter;s__ | 1 |
| OTU_128 | k__Bacteria;p__Proteobacteria;c__Gammaproteobacteria;o__Vibrionales;f__Vibrionaceae;g__Vibrio | 1 |
| OTU_141 | k__Bacteria;p__Firmicutes;c__Bacilli;o__Lactobacillales;f__Streptococcaceae;g__Streptococcus;s__Streptococcus_parauberis | 1 |
| OTU_75 | k__Bacteria;p__Bacteroidetes;c__Bacteroidia;o__Flavobacteriales;f__Cryomorphaceae;g__;s__ | 1 |
| OTU_72 | k__Bacteria;p__Actinobacteria;c__Coriobacteriia;o__Coriobacteriales;f__Eggerthellaceae;g__Slackia;s__ | 1 |
| OTU_1262 | k__Bacteria;p__Firmicutes;c__Clostridia;o__Clostridiales;f__Lachnospiraceae | 1 |
| OTU_1263 | k__Bacteria;p__Firmicutes;c__Clostridia;o__Clostridiales;f__Lachnospiraceae | 1 |
| OTU_1260 | k__Bacteria;p__Bacteroidetes;c__Bacteroidia;o__Bacteroidales | 0.82 |
| OTU_1261 | k__Bacteria;p__Proteobacteria;c__Deltaproteobacteria;o__Desulfovibrionales;f__Desulfovibrionaceae;g__Desulfovibrio;s__Desulfovibrio_desulfuricans | 1 |
| OTU_1266 | k__Bacteria;p__Chloroflexi;c__Ktedonobacteria;o__Ktedonobacterales;f__Ktedonobacteraceae | 0.95 |
| OTU_1267 | k__Bacteria;p__Proteobacteria;c__Gammaproteobacteria;o__Enterobacteriales;f__Enterobacteriaceae | 1 |
| OTU_1264 | k__Bacteria;p__Proteobacteria;c__Gammaproteobacteria;o__unidentified_Gammaproteobacteria;f__Burkholderiaceae;g__Duganella | 0.99 |
| OTU_1265 | k__Bacteria;p__Bacteroidetes;c__Bacteroidia;o__Flavobacteriales;f__Flavobacteriaceae;g__Flavobacterium | 1 |
| OTU_1268 | k__Bacteria;p__Firmicutes;c__Clostridia;o__Clostridiales;f__unidentified_Clostridiales;g__Anaerococcus;s__Anaerococcus_octavius | 0.96 |
| OTU_1269 | k__Bacteria;p__Actinobacteria;c__unidentified_Actinobacteria;o__Corynebacteriales;f__Corynebacteriaceae;g__Corynebacterium;s__Corynebacterium_durum | 0.85 |
| OTU_1060 | k__Bacteria;p__Bacteroidetes;c__Bacteroidia;o__Bacteroidales;f__Muribaculaceae;g__;s__ | 1 |
| OTU_1061 | k__Bacteria;p__Bacteroidetes;c__Bacteroidia;o__Bacteroidales;f__Prevotellaceae;g__;s__ | 0.93 |
| OTU_1062 | k__Bacteria | 1 |
| OTU_1063 | k__Bacteria;p__Firmicutes;c__Negativicutes;o__Selenomonadales;f__Veillonellaceae;g__Veillonella;s__ | 1 |
| OTU_1064 | k__Bacteria;p__Firmicutes;c__Clostridia;o__Clostridiales;f__Lachnospiraceae | 1 |
| OTU_1065 | k__Bacteria;p__Firmicutes;c__Bacilli;o__Bacillales;f__Alicyclobacillaceae;g__Tumebacillus;s__ | 1 |
| OTU_1066 | k__Bacteria;p__Firmicutes;c__Clostridia;o__Clostridiales;f__Lachnospiraceae | 1 |
| OTU_1067 | k__Bacteria;p__Bacteroidetes;c__Bacteroidia;o__Sphingobacteriales;f__;g__;s__ | 0.99 |
| OTU_1068 | k__Bacteria;p__Proteobacteria;c__Gammaproteobacteria | 0.97 |
| OTU_1069 | k__Bacteria;p__Planctomycetes;c__Planctomycetacia | 1 |
| OTU_73 | k__Bacteria;p__Proteobacteria;c__Gammaproteobacteria;o__unidentified_Gammaproteobacteria;f__Burkholderiaceae | 1 |
| OTU_70 | k__Bacteria;p__Firmicutes;c__Erysipelotrichia;o__Erysipelotrichales;f__Erysipelotrichaceae;g__Turicibacter;s__ | 1 |
| OTU_202 | k__Bacteria;p__Firmicutes;c__Clostridia;o__Clostridiales;f__unidentified_Clostridiales | 0.9 |
| OTU_3049 | k__Bacteria;p__Proteobacteria;c__Deltaproteobacteria;o__Myxococcales;f__Haliangiaceae;g__Haliangium;s__ | 0.98 |
| OTU_823 | k__Bacteria;p__Firmicutes;c__Bacilli;o__Bacillales;f__Paenibacillaceae;g__Paenibacillus | 0.96 |
| OTU_2201 | k__Bacteria;p__Planctomycetes;c__Phycisphaerae;o__Phycisphaerales;f__Phycisphaeraceae;g__;s__ | 0.95 |
| OTU_2900 | k__Bacteria;p__Planctomycetes;c__Planctomycetacia;o__unidentified_Planctomycetacia;f__Gemmataceae;g__Gemmata;s__ | 0.94 |
| OTU_2200 | k__Bacteria;p__Bacteroidetes;c__Bacteroidia;o__Bacteroidales;f__Marinifilaceae;g__Odoribacter;s__ | 0.99 |
| OTU_71 | k__Bacteria;p__Bacteroidetes;c__Bacteroidia;o__Flavobacteriales;f__Flavobacteriaceae;g__;s__ | 0.99 |
| OTU_203 | k__Bacteria;p__Actinobacteria;c__unidentified_Actinobacteria;o__Propionibacteriales;f__Nocardioidaceae;g__Nocardioides | 1 |
| OTU_2397 | k__Bacteria;p__Firmicutes;c__Clostridia;o__Clostridiales;f__Lachnospiraceae;g__Roseburia;s__Eubacterium_sp_14-2 | 1 |
| OTU_2396 | k__Bacteria | 1 |
| OTU_2395 | k__Bacteria | 1 |
| OTU_2394 | k__Bacteria;p__Bacteroidetes;c__Bacteroidia;o__Cytophagales;f__Cyclobacteriaceae;g__unidentified_Cyclobacteriaceae | 0.97 |
| OTU_2393 | k__Bacteria;p__Bacteroidetes;c__Bacteroidia;o__Cytophagales;f__Hymenobacteraceae;g__Hymenobacter | 1 |
| OTU_2392 | k__Bacteria | 1 |
| OTU_2391 | k__Bacteria;p__Proteobacteria;c__Gammaproteobacteria | 0.97 |
| OTU_1849 | k__Bacteria;p__Firmicutes;c__Clostridia;o__Clostridiales;f__Lachnospiraceae;g__Pseudobutyrivibrio;s__ | 0.98 |
| OTU_1846 | k__Bacteria;p__Actinobacteria;c__Thermoleophilia;o__Gaiellales;f__;g__;s__ | 0.95 |
| OTU_2209 | k__Bacteria;p__Proteobacteria;c__Alphaproteobacteria;o__unidentified_Alphaproteobacteria;f__unidentified_Alphaproteobacteria;g__Stella;s__ | 0.94 |
| OTU_1844 | k__Bacteria;p__Bacteroidetes;c__Bacteroidia;o__Flavobacteriales;f__Flavobacteriaceae | 1 |
| OTU_1845 | k__Bacteria;p__Proteobacteria;c__Alphaproteobacteria;o__Rhodobacterales;f__Rhodobacteraceae;g__Paracoccus | 1 |
| OTU_1842 | k__Bacteria;p__Firmicutes;c__Clostridia;o__Clostridiales;f__Ruminococcaceae | 0.92 |
| OTU_1843 | k__Bacteria;p__Verrucomicrobia;c__Verrucomicrobiae | 0.97 |
| OTU_2399 | k__Bacteria;p__Planctomycetes;c__Phycisphaerae;o__Tepidisphaerales;f__;g__;s__ | 1 |
| OTU_2208 | k__Bacteria;p__Actinobacteria;c__unidentified_Actinobacteria;o__Pseudonocardiales;f__Pseudonocardiaceae;g__Pseudonocardia;s__ | 0.94 |
| OTU_201 | k__Bacteria | 1 |
| OTU_206 | k__Bacteria;p__Acidobacteria;c__Acidobacteriia;o__;f__;g__;s__ | 0.97 |
| OTU_207 | k__Bacteria;p__Deinococcus-Thermus;c__Deinococci;o__Deinococcales;f__Deinococcaceae;g__Deinococcus;s__Deinococcus_radiodurans | 0.94 |
| OTU_2465 | k__Bacteria;p__Chloroflexi;c__Ktedonobacteria;o__Ktedonobacterales;f__Ktedonobacteraceae;g__;s__ | 0.89 |
| OTU_2464 | k__Bacteria;p__Firmicutes;c__Clostridia;o__Clostridiales;f__Ruminococcaceae | 1 |
| OTU_2467 | k__Bacteria;p__Proteobacteria;c__Gammaproteobacteria;o__unidentified_Gammaproteobacteria;f__Burkholderiaceae;g__Sutterella;s__ | 0.94 |
| OTU_2466 | k__Bacteria;p__Proteobacteria;c__Alphaproteobacteria;o__Sphingomonadales;f__Sphingomonadaceae;g__Sphingobium | 1 |
| OTU_2461 | k__Archaea;p__Crenarchaeota;c__;o__;f__;g__;s__ | 1 |
| OTU_204 | k__Bacteria;p__Proteobacteria;c__Alphaproteobacteria;o__Rhizobiales | 1 |
| OTU_2463 | k__Bacteria;p__Firmicutes;c__Clostridia;o__Clostridiales;f__Ruminococcaceae;g__Anaerotruncus;s__ | 0.97 |
| OTU_2462 | k__Bacteria;p__Firmicutes;c__Clostridia;o__Clostridiales | 0.93 |
| OTU_205 | k__Bacteria;p__Bacteroidetes;c__Bacteroidia;o__Bacteroidales;f__Muribaculaceae;g__;s__ | 1 |
| OTU_2469 | k__Bacteria;p__Proteobacteria;c__Deltaproteobacteria;o__Myxococcales | 0.99 |
| OTU_2468 | k__Bacteria;p__Proteobacteria;c__Alphaproteobacteria;o__Caulobacterales;f__Caulobacteraceae | 1 |
| OTU_2263 | k__Bacteria;p__Firmicutes;c__Clostridia;o__Clostridiales;f__Ruminococcaceae;g__unidentified_Ruminococcaceae;s__Ruminiclostridium_sp_KB18 | 1 |
| OTU_2262 | k__Bacteria;p__Firmicutes;c__Clostridia;o__Clostridiales;f__Ruminococcaceae;g__Caproiciproducens;s__ | 0.99 |
| OTU_2261 | k__Bacteria;p__Firmicutes;c__Negativicutes;o__Selenomonadales;f__Veillonellaceae;g__Megamonas;s__ | 0.99 |
| OTU_2260 | k__Archaea;p__Euryarchaeota;c__Methanomicrobia;o__Methanomicrobiales;f__Methanomicrobiaceae;g__unidentified_Methanomicrobiaceae;s__archaeon_enrichment_culture_clone_A6 | 0.92 |
| OTU_2267 | k__Bacteria;p__Proteobacteria;c__Alphaproteobacteria;o__unidentified_Alphaproteobacteria;f__unidentified_Alphaproteobacteria;g__Skermanella;s__ | 0.86 |
| OTU_2266 | k__Bacteria;p__Actinobacteria;c__Coriobacteriia;o__Coriobacteriales;f__Eggerthellaceae;g__Enterorhabdus;s__ | 0.98 |
| OTU_2265 | k__Bacteria;p__Chloroflexi;c__Anaerolineae;o__Ardenticatenales;f__Ardenticatenaceae;g__;s__ | 0.98 |
| OTU_2264 | k__Bacteria;p__Bacteroidetes;c__Bacteroidia;o__Flavobacteriales;f__Flavobacteriaceae;g__Flavobacterium | 1 |
| OTU_1280 | k__Bacteria;p__Tenericutes;c__Mollicutes;o__;f__;g__;s__ | 1 |
| OTU_1281 | k__Bacteria | 0.99 |
| OTU_1282 | k__Bacteria;p__Verrucomicrobia;c__Verrucomicrobiae;o__;f__;g__;s__ | 0.96 |
| OTU_2268 | k__Bacteria;p__Firmicutes;c__Clostridia;o__Clostridiales;f__Lachnospiraceae;g__unidentified_Lachnospiraceae;s__Clostridium_sp_ASF502 | 0.98 |
| OTU_1284 | k__Bacteria;p__Proteobacteria;c__Alphaproteobacteria;o__Sphingomonadales;f__Sphingomonadaceae;g__Novosphingobium | 0.99 |
| OTU_1285 | k__Bacteria | 0.98 |
| OTU_1286 | k__Bacteria;p__Firmicutes;c__Erysipelotrichia;o__Erysipelotrichales;f__Erysipelotrichaceae;g__Dubosiella;s__Firmicutes_bacterium_M10-2 | 1 |
| OTU_1287 | k__Bacteria;p__Firmicutes;c__Clostridia;o__Clostridiales;f__Ruminococcaceae;g__unidentified_Ruminococcaceae | 0.94 |
| OTU_2991 | k__Bacteria;p__Acidobacteria;c__Acidobacteriia;o__Solibacterales;f__unidentified_Solibacterales;g__Bryobacter;s__ | 0.85 |
| OTU_2489 | k__Bacteria;p__Acidobacteria;c__Acidobacteriia;o__Solibacterales;f__unidentified_Solibacterales;g__Candidatus_Solibacter | 1 |
| OTU_2488 | k__Bacteria;p__Actinobacteria;c__Thermoleophilia;o__Solirubrobacterales;f__Solirubrobacteraceae;g__Patulibacter;s__ | 0.86 |
| OTU_1649 | k__Archaea;p__Euryarchaeota;c__Thermoplasmata;o__;f__;g__;s__ | 1 |
| OTU_2483 | k__Bacteria;p__Chloroflexi;c__Ktedonobacteria;o__Ktedonobacterales;f__;g__;s__ | 0.93 |
| OTU_2501 | k__Bacteria;p__Planctomycetes;c__Planctomycetacia;o__;f__;g__;s__ | 0.97 |
| OTU_2481 | k__Bacteria;p__Actinobacteria;c__Acidimicrobiia | 0.91 |
| OTU_2480 | k__Bacteria;p__Bacteroidetes;c__Bacteroidia;o__Bacteroidales;f__Rikenellaceae;g__unidentified_Rikenellaceae;s__iron-reducing_enrichment_clone_Cl-A7 | 1 |
| OTU_2487 | k__Bacteria;p__Firmicutes;c__Clostridia;o__Clostridiales;f__Ruminococcaceae;g__unidentified_Ruminococcaceae | 0.85 |
| OTU_2486 | k__Bacteria;p__Proteobacteria;c__Gammaproteobacteria;o__unidentified_Gammaproteobacteria | 0.99 |
| OTU_2485 | k__Bacteria;p__Verrucomicrobia;c__Verrucomicrobiae;o__Chthoniobacterales;f__Chthoniobacteraceae | 0.9 |
| OTU_2484 | k__Bacteria;p__Firmicutes;c__Clostridia;o__Clostridiales;f__Christensenellaceae | 0.81 |
| OTU_2992 | k__Bacteria;p__Firmicutes;c__Clostridia;o__Clostridiales;f__Ruminococcaceae | 0.92 |
| OTU_120 | k__Bacteria;p__Firmicutes;c__Clostridia;o__Clostridiales;f__Lachnospiraceae;g__Lachnoclostridium;s__Lachnospiraceae_bacterium_2_1_46FAA | 1 |
| OTU_2995 | k__Bacteria;p__Firmicutes;c__Erysipelotrichia;o__Erysipelotrichales;f__Erysipelotrichaceae;g__unidentified_Erysipelotrichaceae;s__[Clostridium]_innocuum | 1 |
| OTU_2994 | k__Bacteria;p__Tenericutes;c__Mollicutes;o__Mycoplasmatales;f__Mycoplasmataceae;g__Mycoplasma;s__Mycoplasma_gallinarum | 1 |
| OTU_3022 | k__Bacteria;p__Proteobacteria;c__Alphaproteobacteria;o__Sphingomonadales;f__Sphingomonadaceae | 1 |
| OTU_3023 | k__Bacteria;p__Actinobacteria;c__unidentified_Actinobacteria;o__Frankiales;f__Sporichthyaceae | 1 |
| OTU_3020 | k__Bacteria;p__Proteobacteria;c__Deltaproteobacteria | 0.95 |
| OTU_3021 | k__Bacteria;p__Bacteroidetes;c__Bacteroidia;o__Chitinophagales;f__Chitinophagaceae;g__Sediminibacterium | 0.84 |
| OTU_3026 | k__Bacteria;p__Proteobacteria;c__Gammaproteobacteria | 0.94 |
| OTU_3027 | k__Bacteria;p__Proteobacteria;c__Gammaproteobacteria;o__unidentified_Gammaproteobacteria;f__Burkholderiaceae;g__Cupriavidus | 1 |
| OTU_3024 | k__Bacteria;p__Planctomycetes;c__Planctomycetacia;o__unidentified_Planctomycetacia;f__unidentified_Planctomycetacia | 0.81 |
| OTU_3025 | k__Bacteria;p__Bacteroidetes;c__Bacteroidia;o__Bacteroidales;f__Porphyromonadaceae;g__Porphyromonas;s__Porphyromonas_pogonae | 1 |
| OTU_3028 | k__Bacteria;p__Proteobacteria;c__Alphaproteobacteria;o__Sphingomonadales;f__Sphingomonadaceae;g__Sphingomonas | 1 |
| OTU_2996 | k__Bacteria;p__Proteobacteria;c__Deltaproteobacteria;o__Oligoflexales | 1 |
| OTU_2007 | k__Bacteria;p__Proteobacteria;c__Gammaproteobacteria;o__unidentified_Gammaproteobacteria | 1 |
| OTU_2006 | k__Bacteria | 1 |
| OTU_2005 | k__Bacteria;p__Actinobacteria;c__Coriobacteriia;o__Coriobacteriales;f__Coriobacteriaceae;g__Collinsella | 1 |
| OTU_2004 | k__Bacteria;p__Fusobacteria;c__Fusobacteriia;o__Fusobacteriales;f__Fusobacteriaceae;g__Fusobacterium;s__Fusobacterium_sp_RMA_1065 | 0.84 |
| OTU_2003 | k__Bacteria | 1 |
| OTU_2002 | k__Bacteria;p__Proteobacteria;c__Alphaproteobacteria;o__Sphingomonadales;f__Sphingomonadaceae;g__Sphingomonas | 0.98 |
| OTU_2001 | k__Bacteria;p__Bacteroidetes;c__Bacteroidia;o__Bacteroidales;f__Muribaculaceae;g__;s__ | 0.9 |
| OTU_2000 | k__Bacteria | 0.95 |
| OTU_2009 | k__Bacteria;p__Proteobacteria;c__Deltaproteobacteria;o__Myxococcales;f__Nannocystaceae;g__Nannocystis;s__Nannocystis_pusilla | 1 |
| OTU_2008 | k__Bacteria;p__Proteobacteria;c__Alphaproteobacteria;o__unidentified_Alphaproteobacteria | 0.93 |
| OTU_2731 | k__Bacteria;p__Proteobacteria;c__Gammaproteobacteria;o__Alteromonadales;f__Idiomarinaceae;g__Aliidiomarina | 1 |
| OTU_2730 | k__Bacteria;p__Chloroflexi;c__Anaerolineae | 0.96 |
| OTU_2733 | k__Bacteria;p__Proteobacteria;c__Deltaproteobacteria;o__Bdellovibrionales;f__Bacteriovoracaceae | 1 |
| OTU_2732 | k__Bacteria;p__Firmicutes;c__Bacilli;o__Lactobacillales;f__Aerococcaceae;g__Dolosicoccus;s__ | 1 |
| OTU_2735 | k__Bacteria | 1 |
| OTU_2734 | k__Bacteria;p__Chloroflexi;c__Chloroflexia;o__Chloroflexales | 0.84 |
| OTU_2737 | k__Bacteria;p__Proteobacteria;c__Alphaproteobacteria;o__unidentified_Alphaproteobacteria;f__Acetobacteraceae;g__Gluconobacter;s__Gluconobacter_frateurii | 0.98 |
| OTU_2736 | k__Bacteria;p__Actinobacteria;c__unidentified_Actinobacteria;o__Micrococcales;f__Micrococcaceae;g__Glutamicibacter;s__ | 1 |
| OTU_2739 | k__Bacteria;p__Acidobacteria;c__Acidobacteriia | 1 |
| OTU_2738 | k__Bacteria;p__Cyanobacteria;c__unidentified_Cyanobacteria;o__unidentified_Cyanobacteria;f__unidentified_Cyanobacteria;g__unidentified_Cyanobacteria;s__Prasiolopsis_sp_SAG_8481 | 0.98 |
| OTU_103 | k__Bacteria;p__Spirochaetes;c__Spirochaetia;o__Spirochaetales;f__Spirochaetaceae;g__unidentified_Spirochaetaceae;s__Spirochaetaceae_bacterium_SURF-1 | 0.9 |
| OTU_102 | k__Bacteria;p__Firmicutes;c__Clostridia;o__Clostridiales;f__Lachnospiraceae;g__Blautia;s__Ruminococcus_sp_5_1_39BFAA | 0.99 |
| OTU_105 | k__Bacteria;p__Firmicutes;c__Clostridia;o__Clostridiales;f__Ruminococcaceae | 1 |
| OTU_1879 | k__Bacteria;p__Proteobacteria;c__Gammaproteobacteria;o__Alteromonadales;f__Alteromonadaceae;g__Rheinheimera | 1 |
| OTU_107 | k__Bacteria;p__Bacteroidetes;c__Bacteroidia;o__Cytophagales;f__Cyclobacteriaceae;g__Marinoscillum;s__ | 1 |
| OTU_106 | k__Bacteria;p__Bacteroidetes;c__Bacteroidia;o__Bacteroidales;f__Bacteroidaceae;g__Bacteroides | 1 |
| OTU_2387 | k__Bacteria;p__Bacteroidetes;c__Bacteroidia;o__Bacteroidales;f__Muribaculaceae;g__;s__ | 0.99 |
| OTU_143 | k__Bacteria;p__Cyanobacteria;c__unidentified_Cyanobacteria;o__unidentified_Cyanobacteria;f__unidentified_Cyanobacteria;g__unidentified_Cyanobacteria;s__Teleaulax_amphioxeia | 0.83 |
| OTU_1647 | k__Bacteria;p__Bacteroidetes;c__Bacteroidia;o__Flavobacteriales;f__;g__;s__ | 1 |
| OTU_179 | k__Bacteria;p__Chloroflexi;c__Anaerolineae;o__Anaerolineales;f__Anaerolineaceae | 0.9 |
| OTU_2139 | k__Bacteria;p__Verrucomicrobia;c__Verrucomicrobiae;o__Chthoniobacterales;f__Chthoniobacteraceae;g__Candidatus_Udaeobacter;s__ | 1 |
| OTU_2138 | k__Bacteria;p__Bacteroidetes;c__Bacteroidia;o__Bacteroidales;f__Bacteroidaceae;g__Bacteroides;s__Bacteroides_eggerthii | 0.98 |
| OTU_2649 | k__Bacteria;p__Bacteroidetes;c__Bacteroidia;o__Bacteroidales;f__Rikenellaceae;g__;s__ | 0.99 |
| OTU_2648 | k__Bacteria;p__Bacteroidetes;c__Bacteroidia;o__Flavobacteriales;f__Flavobacteriaceae | 1 |
| OTU_2645 | k__Bacteria;p__Bacteroidetes;c__Bacteroidia;o__Flavobacteriales;f__Crocinitomicaceae;g__Brumimicrobium | 1 |
| OTU_2644 | k__Bacteria;p__Bacteroidetes;c__Bacteroidia;o__Cytophagales;f__Microscillaceae;g__Ohtaekwangia;s__ | 1 |
| OTU_2647 | k__Bacteria;p__Firmicutes;c__Clostridia;o__Clostridiales;f__Ruminococcaceae;g__Butyricicoccus | 1 |
| OTU_2130 | k__Bacteria;p__Proteobacteria;c__Gammaproteobacteria;o__Pseudomonadales;f__Moraxellaceae;g__Acinetobacter | 1 |
| OTU_2641 | k__Bacteria;p__Proteobacteria;c__Alphaproteobacteria;o__Rhizobiales;f__Xanthobacteraceae | 0.9 |
| OTU_2640 | k__Bacteria;p__Proteobacteria;c__Gammaproteobacteria | 0.95 |
| OTU_2643 | k__Bacteria;p__Actinobacteria;c__unidentified_Actinobacteria;o__Actinomycetales;f__Actinomycetaceae;g__Trueperella;s__Trueperella_pyogenes | 1 |
| OTU_2642 | k__Bacteria;p__Proteobacteria;c__Deltaproteobacteria;o__Myxococcales;f__Polyangiaceae;g__Pajaroellobacter;s__ | 0.9 |
| OTU_215 | k__Bacteria;p__Bacteroidetes;c__Bacteroidia;o__Bacteroidales;f__Rikenellaceae;g__Alistipes;s__Alistipes_finegoldii | 1 |
| OTU_214 | k__Bacteria;p__Firmicutes;c__Bacilli;o__Lactobacillales;f__Enterococcaceae;g__Enterococcus;s__Enterococcus_cecorum | 0.96 |
| OTU_217 | k__Bacteria;p__Actinobacteria;c__unidentified_Actinobacteria;o__Corynebacteriales;f__Mycobacteriaceae;g__Mycobacterium;s__Mycobacterium_celatum | 0.91 |
| OTU_216 | k__Bacteria;p__Bacteroidetes;c__Bacteroidia;o__Bacteroidales;f__Muribaculaceae;g__;s__ | 0.98 |
| OTU_211 | k__Bacteria;p__Proteobacteria;c__Gammaproteobacteria | 0.92 |
| OTU_1469 | k__Bacteria;p__Thermotogae;c__unidentified_Thermotogae;o__Thermotogales;f__Fervidobacteriaceae;g__Fervidobacterium;s__ | 1 |
| OTU_213 | k__Bacteria;p__Bacteroidetes;c__Bacteroidia;o__Bacteroidales;f__Tannerellaceae;g__Parabacteroides;s__Parabacteroides_merdae | 0.99 |
| OTU_212 | k__Bacteria;p__Actinobacteria;c__unidentified_Actinobacteria | 1 |
| OTU_1464 | k__Bacteria;p__Planctomycetes;c__Phycisphaerae;o__Phycisphaerales;f__Phycisphaeraceae;g__;s__ | 1 |
| OTU_1877 | k__Archaea;p__Euryarchaeota;c__Thermoplasmata | 1 |
| OTU_1466 | k__Bacteria;p__Chloroflexi;c__Anaerolineae | 0.85 |
| OTU_1467 | k__Bacteria;p__Proteobacteria;c__Gammaproteobacteria | 0.95 |
| OTU_1460 | k__Bacteria;p__Bacteroidetes;c__Bacteroidia;o__Sphingobacteriales;f__unidentified_Sphingobacteriales;g__unidentified_Sphingobacteriales;s__Bacteroidetes_bacterium_OLB10 | 1 |
| OTU_1461 | k__Bacteria;p__Bacteroidetes;c__Bacteroidia;o__Sphingobacteriales;f__Sphingobacteriaceae;g__Mucilaginibacter | 0.96 |
| OTU_1462 | k__Bacteria | 1 |
| OTU_1876 | k__Bacteria;p__Actinobacteria;c__unidentified_Actinobacteria;o__Corynebacteriales;f__Corynebacteriaceae;g__unidentified_Corynebacteriaceae | 0.94 |
| OTU_585 | k__Bacteria | 1 |
| OTU_584 | k__Bacteria;p__Bacteroidetes;c__Bacteroidia;o__Cytophagales;f__Hymenobacteraceae;g__Hymenobacter | 1 |
| OTU_587 | k__Bacteria;p__Firmicutes;c__Clostridia;o__Clostridiales;f__Lachnospiraceae | 1 |
| OTU_586 | k__Bacteria;p__Bacteroidetes;c__Bacteroidia;o__Bacteroidales;f__Bacteroidaceae;g__Bacteroides;s__Bacteroides_caccae | 1 |
| OTU_581 | k__Bacteria;p__Bacteroidetes;c__Bacteroidia;o__Flavobacteriales;f__unidentified_Flavobacteriales;g__Chryseobacterium | 0.99 |
| OTU_580 | k__Bacteria;p__Proteobacteria;c__Gammaproteobacteria;o__Xanthomonadales;f__Rhodanobacteraceae | 0.87 |
| OTU_583 | k__Bacteria;p__Proteobacteria;c__Gammaproteobacteria;o__Xanthomonadales;f__Rhodanobacteraceae;g__Dokdonella;s__ | 0.97 |
| OTU_582 | k__Bacteria;p__Actinobacteria;c__Thermoleophilia;o__Solirubrobacterales;f__;g__;s__ | 0.96 |
| OTU_589 | k__Bacteria;p__Proteobacteria;c__Alphaproteobacteria;o__unidentified_Alphaproteobacteria;f__unidentified_Alphaproteobacteria;g__unidentified_Alphaproteobacteria | 0.93 |
| OTU_588 | k__Archaea | 0.98 |
| OTU_2615 | k__Bacteria;p__Proteobacteria;c__Alphaproteobacteria;o__Rickettsiales;f__Rickettsiaceae;g__Candidatus_Megaira;s__ | 0.99 |
| OTU_1676 | k__Bacteria;p__Bacteroidetes;c__Bacteroidia;o__Flavobacteriales;f__Flavobacteriaceae;g__Pseudofulvibacter;s__ | 0.8 |
| OTU_1848 | k__Bacteria;p__Firmicutes;c__Bacilli;o__Bacillales;f__Paenibacillaceae;g__Paenibacillus;s__Paenibacillus_chinensis | 1 |
| OTU_80 | k__Bacteria;p__Cyanobacteria;c__unidentified_Cyanobacteria;o__unidentified_Cyanobacteria;f__unidentified_Cyanobacteria;g__unidentified_Cyanobacteria;s__Virgulinella_fragilis | 0.89 |
| OTU_344 | k__Bacteria;p__Actinobacteria;c__Thermoleophilia;o__Solirubrobacterales;f__Solirubrobacteraceae;g__Solirubrobacter;s__ | 1 |
| OTU_2869 | k__Bacteria;p__Chloroflexi;c__Anaerolineae | 0.86 |
| OTU_2868 | k__Bacteria;p__unidentified_Bacteria;c__unidentified_Bacteria;o__Campylobacterales;f__Campylobacteraceae;g__Campylobacter | 1 |
| OTU_197 | k__Bacteria;p__Bacteroidetes;c__Bacteroidia;o__Bacteroidales;f__Rikenellaceae;g__Alistipes;s__ | 0.99 |
| OTU_2861 | k__Bacteria;p__Firmicutes;c__Clostridia;o__Clostridiales;f__Lachnospiraceae | 0.97 |
| OTU_2860 | k__Bacteria;p__Actinobacteria;c__unidentified_Actinobacteria;o__Bifidobacteriales;f__Bifidobacteriaceae;g__Bifidobacterium | 1 |
| OTU_2863 | k__Bacteria;p__Actinobacteria;c__Thermoleophilia;o__Gaiellales;f__;g__;s__ | 0.93 |
| OTU_2862 | k__Bacteria;p__Atribacteria;c__;o__;f__;g__;s__ | 1 |
| OTU_2865 | k__Bacteria;p__Bacteroidetes;c__Bacteroidia;o__Chitinophagales;f__Chitinophagaceae;g__Dinghuibacter;s__ | 0.93 |
| OTU_2864 | k__Bacteria;p__Proteobacteria;c__Alphaproteobacteria;o__Rhodobacterales;f__Rhodobacteraceae | 1 |
| OTU_2867 | k__Bacteria;p__Nitrospirae | 1 |
| OTU_2866 | k__Bacteria;p__Firmicutes;c__Clostridia;o__Clostridiales;f__Ruminococcaceae;g__Anaerotruncus;s__ | 1 |
| OTU_361 | k__Bacteria;p__Actinobacteria;c__unidentified_Actinobacteria;o__Propionibacteriales;f__Nocardioidaceae;g__Nocardioides | 0.99 |
| OTU_360 | k__Bacteria;p__Proteobacteria;c__Deltaproteobacteria;o__;f__;g__;s__ | 0.85 |
| OTU_363 | k__Bacteria;p__Firmicutes;c__Bacilli;o__Bacillales;f__Bacillaceae | 0.92 |
| OTU_362 | k__Bacteria;p__Proteobacteria;c__Alphaproteobacteria;o__Rhizobiales;f__Rhizobiaceae | 0.82 |
| OTU_365 | k__Bacteria;p__Proteobacteria;c__Alphaproteobacteria;o__unidentified_Alphaproteobacteria;f__unidentified_Alphaproteobacteria;g__unidentified_Alphaproteobacteria;s__Candidatus_Pelagibacter_ubique | 0.93 |
| OTU_364 | k__Bacteria;p__Acidobacteria | 1 |
| OTU_367 | k__Bacteria | 0.99 |
| OTU_366 | k__Bacteria;p__Proteobacteria;c__Gammaproteobacteria;o__unidentified_Gammaproteobacteria;f__unidentified_Gammaproteobacteria;g__unidentified_Gammaproteobacteria;s__beta_proteobacterium_WF17 | 0.89 |
| OTU_369 | k__Bacteria;p__Gemmatimonadetes;c__;o__;f__;g__;s__ | 0.99 |
| OTU_368 | k__Bacteria;p__Proteobacteria;c__Alphaproteobacteria;o__Sphingomonadales;f__Sphingomonadaceae;g__Rhizorhapis | 0.9 |
| OTU_691 | k__Bacteria;p__Proteobacteria;c__Deltaproteobacteria;o__Myxococcales;f__Haliangiaceae;g__Haliangium;s__ | 1 |
| OTU_690 | k__Bacteria;p__Firmicutes;c__Clostridia;o__Clostridiales;f__Defluviitaleaceae;g__unidentified_Defluviitaleaceae | 1 |
| OTU_693 | k__Bacteria;p__unidentified_Bacteria;c__unidentified_Bacteria;o__Campylobacterales;f__unidentified_Campylobacterales;g__Sulfurospirillum | 0.97 |
| OTU_692 | k__Bacteria;p__Proteobacteria;c__Alphaproteobacteria;o__Rhizobiales | 0.82 |
| OTU_695 | k__Bacteria;p__Verrucomicrobia;c__Verrucomicrobiae;o__;f__;g__;s__ | 0.98 |
| OTU_694 | k__Bacteria;p__Proteobacteria;c__Deltaproteobacteria;o__Desulfovibrionales;f__Desulfovibrionaceae;g__Desulfovibrio | 1 |
| OTU_697 | k__Bacteria;p__Planctomycetes;c__Planctomycetacia;o__unidentified_Planctomycetacia;f__Gemmataceae;g__;s__ | 1 |
| OTU_696 | k__Bacteria;p__Firmicutes;c__Bacilli;o__Bacillales;f__Paenibacillaceae;g__Paenibacillus | 1 |
| OTU_699 | k__Bacteria;p__Firmicutes;c__Clostridia;o__Clostridiales;f__Lachnospiraceae | 1 |
| OTU_698 | k__Bacteria;p__Bacteroidetes;c__Bacteroidia;o__Bacteroidales;f__Prevotellaceae;g__Alloprevotella | 0.82 |
| OTU_1121 | k__Bacteria;p__Proteobacteria;c__Deltaproteobacteria;o__Myxococcales;f__Polyangiaceae;g__Pajaroellobacter | 0.89 |
| OTU_1604 | k__Bacteria;p__Firmicutes;c__Clostridia;o__Clostridiales;f__Ruminococcaceae;g__;s__ | 0.82 |
| OTU_1605 | k__Bacteria;p__Verrucomicrobia;c__Verrucomicrobiae;o__Verrucomicrobiales;f__Rubritaleaceae;g__Luteolibacter;s__ | 1 |
| OTU_1606 | k__Bacteria;p__Proteobacteria;c__Alphaproteobacteria;o__Rhodobacterales;f__Rhodobacteraceae | 1 |
| OTU_1607 | k__Bacteria;p__unidentified_Bacteria;c__unidentified_Bacteria;o__Halanaerobiales;f__Halanaerobiaceae;g__Halanaerobium | 1 |
| OTU_1600 | k__Bacteria;p__Proteobacteria;c__Gammaproteobacteria;o__unidentified_Gammaproteobacteria | 1 |
| OTU_1601 | k__Bacteria;p__Bacteroidetes;c__Bacteroidia;o__Bacteroidales;f__Bacteroidaceae;g__Bacteroides;s__Bacteroides_barnesiae | 1 |
| OTU_1602 | k__Bacteria;p__Bacteroidetes;c__Bacteroidia;o__Sphingobacteriales | 0.9 |
| OTU_1603 | k__Bacteria;p__Firmicutes;c__Clostridia;o__Clostridiales;f__Lachnospiraceae | 1 |
| OTU_963 | k__Bacteria;p__Bacteroidetes;c__Bacteroidia;o__Flavobacteriales;f__;g__;s__ | 0.96 |
| OTU_962 | k__Bacteria;p__Proteobacteria;c__Deltaproteobacteria;o__Bdellovibrionales;f__Bdellovibrionaceae;g__Bdellovibrio;s__Bdellovibrionales_bacterium_Ga0074137 | 1 |
| OTU_961 | k__Bacteria;p__Actinobacteria;c__Thermoleophilia;o__;f__;g__;s__ | 1 |
| OTU_960 | k__Bacteria;p__Proteobacteria;c__Alphaproteobacteria;o__Rhizobiales;f__Beijerinckiaceae;g__Methylovirgula;s__ | 0.92 |
| OTU_1608 | k__Bacteria;p__Elusimicrobia;c__;o__;f__;g__;s__ | 0.84 |
| OTU_1609 | k__Bacteria;p__Proteobacteria;c__Deltaproteobacteria;o__Myxococcales;f__Polyangiaceae;g__Pajaroellobacter;s__ | 0.93 |
| OTU_965 | k__Bacteria;p__Firmicutes;c__Clostridia;o__Clostridiales;f__Lachnospiraceae | 0.98 |
| OTU_964 | k__Bacteria;p__Firmicutes;c__Clostridia;o__Clostridiales;f__Ruminococcaceae;g__Harryflintia;s__ | 0.91 |
| OTU_2955 | k__Bacteria;p__Actinobacteria;c__Coriobacteriia;o__Coriobacteriales;f__Eggerthellaceae | 1 |
| OTU_2954 | k__Bacteria;p__Firmicutes;c__Clostridia;o__Clostridiales;f__unidentified_Clostridiales;g__unidentified_Clostridiales | 0.99 |
| OTU_2957 | k__Bacteria;p__Acidobacteria;c__Acidobacteriia;o__Solibacterales;f__unidentified_Solibacterales;g__Bryobacter;s__ | 0.93 |
| OTU_1737 | k__Bacteria;p__Firmicutes;c__Clostridia;o__Clostridiales;f__Ruminococcaceae | 0.96 |
| OTU_2956 | k__Bacteria;p__Bacteroidetes;c__Bacteroidia | 1 |
| OTU_471 | k__Bacteria;p__Proteobacteria;c__Alphaproteobacteria;o__Sphingomonadales;f__Sphingomonadaceae | 1 |
| OTU_1689 | k__Bacteria;p__Bacteroidetes;c__Bacteroidia;o__Cytophagales;f__Cytophagaceae;g__Rhodocytophaga;s__ | 0.88 |
| OTU_1118 | k__Bacteria;p__Actinobacteria;c__unidentified_Actinobacteria;o__Pseudonocardiales;f__Pseudonocardiaceae;g__Lechevalieria | 0.97 |
| OTU_1119 | k__Bacteria;p__Acidobacteria;c__Acidobacteriia;o__Acidobacteriales;f__unidentified_Acidobacteriales;g__Candidatus_Koribacter;s__ | 0.9 |
| OTU_2953 | k__Bacteria;p__Firmicutes;c__Clostridia;o__Clostridiales | 0.86 |
| OTU_1110 | k__Bacteria;p__Verrucomicrobia;c__Verrucomicrobiae;o__Verrucomicrobiales;f__Rubritaleaceae;g__Luteolibacter;s__ | 0.97 |
| OTU_1111 | k__Archaea;p__Euryarchaeota;c__Methanomicrobia;o__Methanomicrobiales;f__Methanomicrobiaceae;g__Methanoculleus;s__ | 0.86 |
| OTU_1112 | k__Bacteria;p__Actinobacteria;c__unidentified_Actinobacteria;o__Micrococcales | 0.98 |
| OTU_1113 | k__Bacteria;p__Bacteroidetes;c__Bacteroidia;o__Flavobacteriales;f__Flavobacteriaceae;g__Aquibacter;s__ | 1 |
| OTU_1114 | k__Bacteria;p__Bacteroidetes;c__Bacteroidia | 0.92 |
| OTU_1115 | k__Bacteria;p__Firmicutes;c__Clostridia;o__Clostridiales | 0.99 |
| OTU_1116 | k__Bacteria;p__Proteobacteria;c__Alphaproteobacteria;o__Rhizobiales;f__Beijerinckiaceae;g__Methylobacterium | 1 |
| OTU_1117 | k__Bacteria;p__Chloroflexi;c__Anaerolineae;o__;f__;g__;s__ | 0.93 |
| OTU_89 | k__Bacteria;p__Firmicutes;c__Clostridia;o__Clostridiales;f__Peptostreptococcaceae;g__Romboutsia;s__ | 0.99 |
| OTU_1335 | k__Bacteria;p__Bacteroidetes;c__Bacteroidia;o__Chitinophagales;f__Chitinophagaceae;g__Flaviaesturariibacter;s__ | 0.97 |
| OTU_808 | k__Bacteria;p__Proteobacteria;c__Alphaproteobacteria;o__unidentified_Alphaproteobacteria;f__unidentified_Alphaproteobacteria | 0.89 |
| OTU_1681 | k__Bacteria;p__Proteobacteria;c__Gammaproteobacteria;o__unidentified_Gammaproteobacteria;f__Burkholderiaceae;g__Advenella;s__ | 0.85 |
| OTU_1275 | k__Bacteria;p__Proteobacteria;c__Deltaproteobacteria;o__Bdellovibrionales;f__Bdellovibrionaceae;g__Bdellovibrio;s__ | 1 |
| OTU_1274 | k__Bacteria;p__Cyanobacteria;c__unidentified_Cyanobacteria;o__unidentified_Cyanobacteria;f__unidentified_Cyanobacteria;g__unidentified_Cyanobacteria | 1 |
| OTU_1277 | k__Bacteria;p__Firmicutes;c__Clostridia;o__Clostridiales;f__Lachnospiraceae;g__Lachnoclostridium;s__[Clostridium]_fimetarium | 0.97 |
| OTU_1276 | k__Bacteria;p__Chloroflexi;c__Anaerolineae;o__Anaerolineales;f__Anaerolineaceae;g__;s__ | 0.97 |
| OTU_1271 | k__Bacteria;p__Firmicutes;c__Clostridia;o__Clostridiales;f__Lachnospiraceae | 0.99 |
| OTU_1270 | k__Bacteria;p__Bacteroidetes;c__Bacteroidia;o__Sphingobacteriales;f__Sphingobacteriaceae;g__Pedobacter | 0.89 |
| OTU_1273 | k__Bacteria;p__Bacteroidetes;c__Bacteroidia;o__Chitinophagales;f__Chitinophagaceae | 1 |
| OTU_1272 | k__Bacteria;p__Bacteroidetes;c__Bacteroidia;o__Sphingobacteriales;f__Lentimicrobiaceae;g__unidentified_Lentimicrobiaceae | 1 |
| OTU_1279 | k__Bacteria;p__Proteobacteria;c__Gammaproteobacteria;o__unidentified_Gammaproteobacteria;f__Burkholderiaceae;g__Sutterella;s__ | 0.81 |
| OTU_1278 | k__Bacteria;p__Proteobacteria;c__Alphaproteobacteria;o__Rickettsiales;f__unidentified_Rickettsiales;g__unidentified_Rickettsiales;s__ | 0.99 |
| OTU_1073 | k__Bacteria;p__Proteobacteria;c__Alphaproteobacteria | 0.99 |
| OTU_1072 | k__Bacteria;p__Proteobacteria;c__Alphaproteobacteria;o__Rhodobacterales;f__Rhodobacteraceae;g__unidentified_Rhodobacteraceae;s__alpha_proteobacterium_GMD37D2 | 0.99 |
| OTU_1071 | k__Bacteria;p__Actinobacteria;c__Thermoleophilia | 0.88 |
| OTU_1070 | k__Bacteria;p__Chloroflexi;c__Ktedonobacteria;o__Ktedonobacterales | 0.95 |
| OTU_1077 | k__Bacteria | 1 |
| OTU_1076 | k__Bacteria;p__Chloroflexi;c__Ktedonobacteria;o__Ktedonobacterales;f__;g__;s__ | 0.97 |
| OTU_1075 | k__Bacteria;p__Proteobacteria;c__Gammaproteobacteria;o__Xanthomonadales;f__Rhodanobacteraceae;g__Rhodanobacter;s__Rhodanobacter_sp | 0.99 |
| OTU_809 | k__Archaea;p__Thaumarchaeota;c__Nitrososphaeria;o__Nitrososphaerales;f__Nitrososphaeraceae;g__;s__ | 1 |
| OTU_1079 | k__Bacteria;p__Planctomycetes;c__Planctomycetacia;o__Planctomycetales;f__unidentified_Planctomycetales;g__Planctopirus;s__ | 1 |
| OTU_1078 | k__Bacteria;p__Proteobacteria;c__Gammaproteobacteria;o__Xanthomonadales;f__Xanthomonadaceae | 1 |
| OTU_1728 | k__Bacteria;p__Tenericutes;c__Mollicutes;o__Anaeroplasmatales;f__Anaeroplasmataceae;g__Anaeroplasma;s__ | 0.95 |
| OTU_1479 | k__Bacteria;p__Firmicutes;c__Bacilli;o__Lactobacillales;f__Carnobacteriaceae;g__Jeotgalibaca;s__Jeotgalibaca_dankookensis | 0.82 |
| OTU_375 | k__Bacteria;p__Bacteroidetes;c__Bacteroidia;o__Chitinophagales;f__Chitinophagaceae | 1 |
| OTU_1766 | k__Bacteria | 0.99 |
| OTU_2558 | k__Bacteria;p__Firmicutes;c__Clostridia;o__Clostridiales;f__Lachnospiraceae;g__Marvinbryantia;s__ | 0.99 |
| OTU_1851 | k__Bacteria;p__Actinobacteria;c__unidentified_Actinobacteria;o__Propionibacteriales | 0.8 |
| OTU_1850 | k__Bacteria;p__Proteobacteria;c__Gammaproteobacteria;o__unidentified_Gammaproteobacteria;f__Burkholderiaceae | 1 |
| OTU_1853 | k__Bacteria;p__Spirochaetes;c__Spirochaetia;o__Spirochaetales;f__Spirochaetaceae;g__unidentified_Spirochaetaceae | 0.86 |
| OTU_1852 | k__Bacteria;p__Proteobacteria;c__Gammaproteobacteria;o__Chromatiales;f__;g__;s__ | 0.92 |
| OTU_1855 | k__Bacteria;p__Firmicutes;c__Clostridia;o__Clostridiales;f__Lachnospiraceae | 1 |
| OTU_1854 | k__Bacteria;p__Bacteroidetes;c__Bacteroidia;o__Cytophagales;f__Microscillaceae;g__Siphonobacter;s__Siphonobacter_aquaeclarae | 1 |
| OTU_1857 | k__Bacteria;p__Proteobacteria | 0.87 |
| OTU_1856 | k__Bacteria;p__Proteobacteria;c__Alphaproteobacteria;o__Rickettsiales;f__unidentified_Rickettsiales;g__unidentified_Rickettsiales;s__ | 0.89 |
| OTU_1859 | k__Bacteria;p__Bacteroidetes;c__Bacteroidia;o__Chitinophagales;f__Saprospiraceae | 1 |
| OTU_1858 | k__Bacteria;p__Bacteroidetes;c__Bacteroidia;o__Bacteroidales | 1 |
| OTU_160 | k__Bacteria;p__Proteobacteria;c__Alphaproteobacteria;o__Rhizobiales;f__Beijerinckiaceae;g__Roseiarcus;s__ | 1 |
| OTU_2256 | k__Bacteria | 0.99 |
| OTU_2257 | k__Bacteria;p__Proteobacteria;c__Gammaproteobacteria;o__Enterobacteriales;f__Enterobacteriaceae;g__Morganella;s__ | 0.97 |
| OTU_2254 | k__Bacteria;p__Planctomycetes;c__Planctomycetacia;o__Planctomycetales;f__unidentified_Planctomycetales;g__Planctomicrobium;s__ | 1 |
| OTU_2255 | k__Bacteria;p__Proteobacteria;c__Alphaproteobacteria;o__Rickettsiales;f__unidentified_Rickettsiales;g__unidentified_Rickettsiales;s__ | 0.95 |
| OTU_2252 | k__Bacteria;p__Cyanobacteria;c__unidentified_Cyanobacteria;o__unidentified_Cyanobacteria;f__unidentified_Cyanobacteria;g__unidentified_Cyanobacteria | 1 |
| OTU_2253 | k__Bacteria;p__Bacteroidetes;c__Ignavibacteria;o__;f__;g__;s__ | 0.97 |
| OTU_2250 | k__Bacteria;p__Proteobacteria;c__Alphaproteobacteria;o__Rickettsiales;f__unidentified_Rickettsiales;g__unidentified_Rickettsiales;s__ | 1 |
| OTU_2251 | k__Bacteria;p__Gemmatimonadetes;c__unidentified_Gemmatimonadetes;o__Gemmatimonadales;f__Gemmatimonadaceae;g__;s__ | 1 |
| OTU_1293 | k__Bacteria;p__Actinobacteria;c__Nitriliruptoria;o__Nitriliruptorales;f__Nitriliruptoraceae | 0.94 |
| OTU_1292 | k__Bacteria;p__Bacteroidetes;c__Bacteroidia;o__Cytophagales;f__Cytophagaceae;g__Sporocytophaga;s__Sporocytophaga_myxococcoides | 0.97 |
| OTU_1291 | k__Bacteria;p__Firmicutes;c__Clostridia;o__Clostridiales;f__Ruminococcaceae | 0.98 |
| OTU_1290 | k__Bacteria;p__Firmicutes;c__Clostridia;o__Clostridiales;f__Ruminococcaceae | 0.98 |
| OTU_1297 | k__Bacteria;p__Bacteroidetes;c__Bacteroidia;o__Chitinophagales;f__Chitinophagaceae;g__Terrimonas;s__ | 0.85 |
| OTU_1296 | k__Bacteria;p__Proteobacteria;c__Deltaproteobacteria | 0.95 |
| OTU_2258 | k__Bacteria;p__Firmicutes;c__Clostridia;o__Clostridiales | 0.99 |
| OTU_2259 | k__Bacteria;p__Firmicutes;c__Clostridia;o__Clostridiales;f__Ruminococcaceae | 0.88 |
| OTU_8 | k__Bacteria;p__unidentified_Bacteria;c__unidentified_Bacteria;o__Campylobacterales;f__Campylobacteraceae;g__Campylobacter;s__ | 0.82 |
| OTU_9 | k__Bacteria;p__Firmicutes;c__Bacilli;o__Lactobacillales;f__Lactobacillaceae;g__Lactobacillus | 1 |
| OTU_2 | k__Bacteria;p__Firmicutes;c__Bacilli;o__Lactobacillales;f__Streptococcaceae;g__Streptococcus | 1 |
| OTU_3 | k__Bacteria;p__Proteobacteria;c__Gammaproteobacteria;o__Enterobacteriales;f__Enterobacteriaceae;g__unidentified_Enterobacteriaceae;s__Escherichia_coli | 0.9 |
| OTU_1 | k__Bacteria;p__Firmicutes;c__Negativicutes;o__Selenomonadales;f__Veillonellaceae;g__Megamonas;s__ | 1 |
| OTU_6 | k__Bacteria;p__Proteobacteria;c__Alphaproteobacteria;o__Sphingomonadales;f__Sphingomonadaceae;g__Sphingomonas | 0.99 |
| OTU_7 | k__Bacteria;p__Cyanobacteria;c__unidentified_Cyanobacteria;o__unidentified_Cyanobacteria;f__unidentified_Cyanobacteria;g__unidentified_Cyanobacteria;s__Lolium_perenne | 0.95 |
| OTU_4 | k__Bacteria;p__Actinobacteria;c__unidentified_Actinobacteria;o__Bifidobacteriales;f__Bifidobacteriaceae;g__Bifidobacterium | 1 |
| OTU_5 | k__Bacteria;p__Firmicutes;c__Clostridia;o__Clostridiales;f__unidentified_Clostridiales;g__unidentified_Clostridiales;s__Clostridium_perfringens | 1 |
| OTU_3035 | k__Bacteria;p__Firmicutes;c__Clostridia;o__Clostridiales;f__unidentified_Clostridiales;g__unidentified_Clostridiales | 1 |
| OTU_3034 | k__Bacteria;p__Planctomycetes;c__Planctomycetacia;o__unidentified_Planctomycetacia;f__Gemmataceae;g__;s__ | 0.9 |
| OTU_3037 | k__Bacteria;p__Proteobacteria;c__Alphaproteobacteria;o__Rickettsiales | 0.84 |
| OTU_3036 | k__Bacteria | 1 |
| OTU_3031 | k__Bacteria;p__Firmicutes;c__Clostridia;o__Clostridiales;f__Ruminococcaceae | 1 |
| OTU_3030 | k__Bacteria;p__Proteobacteria;c__Gammaproteobacteria;o__Methylococcales;f__unidentified_Methylococcales | 1 |
| OTU_3033 | k__Bacteria;p__Proteobacteria;c__Gammaproteobacteria;o__unidentified_Gammaproteobacteria;f__Rhodocyclaceae;g__Denitratisoma;s__Denitratisoma_oestradiolicum | 0.87 |
| OTU_3032 | k__Bacteria;p__Proteobacteria;c__Gammaproteobacteria;o__Pseudomonadales;f__Moraxellaceae;g__Psychrobacter | 1 |
| OTU_2032 | k__Bacteria;p__Bacteroidetes;c__Ignavibacteria | 0.92 |
| OTU_2033 | k__Bacteria;p__Gemmatimonadetes;c__Longimicrobia;o__Longimicrobiales;f__Longimicrobiaceae;g__;s__ | 1 |
| OTU_2030 | k__Bacteria;p__Actinobacteria;c__unidentified_Actinobacteria;o__Frankiales;f__Cryptosporangiaceae;g__Fodinicola | 1 |
| OTU_2031 | k__Bacteria;p__Proteobacteria;c__Gammaproteobacteria | 0.99 |
| OTU_3039 | k__Bacteria;p__Planctomycetes;c__Planctomycetacia;o__unidentified_Planctomycetacia;f__unidentified_Planctomycetacia;g__Pirellula;s__Pirellula_sp_Br1-4 | 0.86 |
| OTU_3038 | k__Bacteria;p__Proteobacteria;c__Deltaproteobacteria;o__Myxococcales;f__Archangiaceae;g__Anaeromyxobacter;s__ | 0.91 |
| OTU_2034 | k__Bacteria;p__Proteobacteria;c__Alphaproteobacteria;o__Rhizobiales;f__Hyphomicrobiaceae;g__Pedomicrobium;s__ | 0.96 |
| OTU_2035 | k__Bacteria;p__Firmicutes;c__Clostridia;o__Clostridiales;f__Lachnospiraceae;g__Shuttleworthia;s__ | 0.96 |
| OTU_2744 | k__Bacteria;p__Bacteroidetes;c__Bacteroidia;o__Sphingobacteriales;f__;g__;s__ | 0.98 |
| OTU_2745 | k__Bacteria;p__Actinobacteria;c__unidentified_Actinobacteria;o__Bifidobacteriales;f__Bifidobacteriaceae;g__Bifidobacterium | 1 |
| OTU_2746 | k__Bacteria;p__Proteobacteria;c__Gammaproteobacteria;o__unidentified_Gammaproteobacteria;f__Methylophilaceae;g__Methylophilus;s__ | 0.8 |
| OTU_2747 | k__Bacteria;p__Firmicutes;c__Bacilli;o__Lactobacillales;f__Streptococcaceae;g__Streptococcus | 0.99 |
| OTU_2740 | k__Bacteria;p__Proteobacteria;c__Alphaproteobacteria;o__unidentified_Alphaproteobacteria;f__Acetobacteraceae | 1 |
| OTU_2741 | k__Bacteria;p__Proteobacteria;c__Alphaproteobacteria;o__Rhizobiales;f__Xanthobacteraceae | 1 |
| OTU_2742 | k__Bacteria;p__Proteobacteria;c__Deltaproteobacteria;o__Myxococcales;f__Sandaracinaceae | 1 |
| OTU_2038 | k__Bacteria;p__Actinobacteria;c__unidentified_Actinobacteria;o__Frankiales;f__Frankiaceae;g__Jatrophihabitans | 0.91 |
| OTU_2748 | k__Bacteria;p__Firmicutes;c__Clostridia;o__Clostridiales;f__unidentified_Clostridiales;g__unidentified_Clostridiales;s__Clostridium_novyi | 0.95 |
| OTU_2749 | k__Bacteria;p__Bacteroidetes;c__Bacteroidia;o__Bacteroidales | 1 |
| OTU_210 | k__Bacteria;p__Bacteroidetes;c__Bacteroidia;o__Flavobacteriales;f__unidentified_Flavobacteriales;g__Cloacibacterium;s__ | 1 |
| OTU_164 | k__Bacteria;p__Proteobacteria;c__Alphaproteobacteria;o__Rhizobiales;f__Xanthobacteraceae | 1 |
| OTU_2108 | k__Bacteria;p__Acidobacteria;c__Acidobacteriia;o__Solibacterales;f__;g__;s__ | 0.9 |
| OTU_2109 | k__Bacteria | 0.81 |
| OTU_2106 | k__Bacteria;p__;c__;o__;f__;g__;s__ | 0.88 |
| OTU_2107 | k__Bacteria;p__Proteobacteria;c__Alphaproteobacteria;o__Sphingomonadales;f__Sphingomonadaceae;g__Altererythrobacter;s__ | 0.92 |
| OTU_2104 | k__Bacteria;p__Bacteroidetes;c__Bacteroidia;o__Chitinophagales;f__Saprospiraceae;g__Aureispira;s__ | 1 |
| OTU_2105 | k__Bacteria;p__Proteobacteria;c__Deltaproteobacteria;o__Myxococcales;f__Myxococcaceae;g__Myxococcus;s__Myxococcus_fulvus | 1 |
| OTU_2102 | k__Bacteria;p__Chloroflexi;c__Anaerolineae | 0.93 |
| OTU_2103 | k__Bacteria;p__Proteobacteria | 0.95 |
| OTU_2100 | k__Bacteria;p__Actinobacteria;c__;o__;f__;g__;s__ | 1 |
| OTU_2101 | k__Bacteria;p__Planctomycetes;c__Planctomycetacia;o__;f__;g__;s__ | 1 |
| OTU_750 | k__Bacteria;p__Firmicutes;c__Negativicutes;o__Selenomonadales;f__Veillonellaceae;g__Megasphaera;s__Megasphaera_elsdenii | 1 |
| OTU_751 | k__Bacteria;p__Firmicutes;c__Negativicutes;o__Selenomonadales;f__Veillonellaceae;g__Dialister;s__ | 1 |
| OTU_752 | k__Bacteria;p__Tenericutes;c__Mollicutes;o__Haloplasmatales;f__Haloplasmataceae;g__Haloplasma | 1 |
| OTU_753 | k__Bacteria;p__Firmicutes;c__Clostridia;o__Clostridiales;f__Ruminococcaceae;g__Butyricicoccus;s__ | 0.86 |
| OTU_754 | k__Bacteria;p__Bacteroidetes;c__Bacteroidia;o__Bacteroidales;f__Muribaculaceae;g__;s__ | 0.99 |
| OTU_755 | k__Bacteria;p__Proteobacteria;c__Alphaproteobacteria;o__Rhizobiales;f__unidentified_Rhizobiales;g__Labrys;s__Labrys_miyagiensis | 0.9 |
| OTU_756 | k__Bacteria;p__Proteobacteria;c__Gammaproteobacteria;o__Oceanospirillales;f__Halomonadaceae;g__Halomonas | 1 |
| OTU_757 | k__Bacteria;p__Chloroflexi;c__Ktedonobacteria;o__Ktedonobacterales;f__;g__;s__ | 0.98 |
| OTU_758 | k__Bacteria;p__Proteobacteria;c__Alphaproteobacteria;o__Rhodospirillales;f__unidentified_Rhodospirillales;g__unidentified_Rhodospirillales;s__alpha_proteobacterium_HIMB59 | 1 |
| OTU_1476 | k__Bacteria;p__Chloroflexi;c__Anaerolineae;o__;f__;g__;s__ | 0.91 |
| OTU_208 | k__Bacteria;p__Proteobacteria;c__Alphaproteobacteria;o__Rhizobiales;f__Beijerinckiaceae;g__Methylobacterium | 1 |
| OTU_1474 | k__Bacteria;p__Proteobacteria;c__Alphaproteobacteria;o__unidentified_Alphaproteobacteria;f__unidentified_Alphaproteobacteria;g__Reyranella;s__ | 1 |
| OTU_1473 | k__Bacteria;p__Proteobacteria;c__Alphaproteobacteria;o__Sphingomonadales;f__Sphingomonadaceae;g__Erythrobacter | 1 |
| OTU_1472 | k__Bacteria;p__Proteobacteria;c__Gammaproteobacteria;o__Xanthomonadales;f__Rhodanobacteraceae;g__Dyella;s__ | 0.9 |
| OTU_1471 | k__Bacteria;p__Firmicutes;c__Clostridia;o__Clostridiales;f__Lachnospiraceae | 1 |
| OTU_1470 | k__Bacteria;p__Chloroflexi;c__Anaerolineae;o__Anaerolineales;f__Anaerolineaceae;g__;s__ | 0.88 |
| OTU_592 | k__Bacteria;p__Proteobacteria;c__Alphaproteobacteria;o__Sphingomonadales;f__Sphingomonadaceae;g__Sphingobium | 1 |
| OTU_593 | k__Bacteria;p__Firmicutes;c__Clostridia;o__Clostridiales;f__Lachnospiraceae;g__unidentified_Lachnospiraceae;s__Lachnospiraceae_bacterium_COE1 | 0.94 |
| OTU_590 | k__Bacteria;p__Actinobacteria;c__Thermoleophilia;o__Solirubrobacterales | 0.92 |
| OTU_591 | k__Bacteria;p__Bacteroidetes;c__Bacteroidia;o__Cytophagales;f__Cyclobacteriaceae;g__Mariniradius;s__ | 1 |
| OTU_596 | k__Bacteria;p__Proteobacteria;c__Deltaproteobacteria;o__Myxococcales;f__Archangiaceae;g__Anaeromyxobacter;s__ | 0.81 |
| OTU_597 | k__Bacteria;p__Proteobacteria;c__Gammaproteobacteria;o__Alteromonadales;f__Idiomarinaceae;g__Idiomarina | 1 |
| OTU_594 | k__Bacteria;p__Proteobacteria;c__Alphaproteobacteria;o__Rhizobiales;f__Xanthobacteraceae | 0.87 |
| OTU_595 | k__Bacteria;p__Proteobacteria;c__Gammaproteobacteria;o__unidentified_Gammaproteobacteria;f__unidentified_Gammaproteobacteria;g__Deefgea;s__Deefgea_chitinilytica | 0.92 |
| OTU_598 | k__Bacteria;p__Firmicutes;c__Bacilli;o__Lactobacillales;f__Lactobacillaceae;g__Lactobacillus | 1 |
| OTU_599 | k__Bacteria;p__Proteobacteria;c__Alphaproteobacteria;o__Caulobacterales;f__Caulobacteraceae;g__Caulobacter | 1 |
| OTU_116 | k__Bacteria;p__Firmicutes;c__Clostridia;o__Clostridiales;f__Lachnospiraceae;g__unidentified_Lachnospiraceae;s__Coprococcus_sp_HPP0074 | 0.94 |
| OTU_117 | k__Bacteria;p__Proteobacteria;c__Deltaproteobacteria;o__Desulfovibrionales;f__Desulfovibrionaceae;g__;s__ | 1 |
| OTU_114 | k__Bacteria;p__Proteobacteria;c__Gammaproteobacteria;o__Cellvibrionales;f__Spongiibacteraceae;g__Spongiibacter;s__ | 1 |
| OTU_115 | k__Bacteria;p__Proteobacteria;c__Gammaproteobacteria;o__Pseudomonadales;f__Moraxellaceae;g__Psychrobacter;s__Psychrobacter_maritimus | 0.96 |
| OTU_112 | k__Bacteria;p__Proteobacteria;c__Gammaproteobacteria;o__Alteromonadales;f__Alteromonadaceae;g__Alteromonas | 0.99 |
| OTU_113 | k__Bacteria;p__Firmicutes;c__Clostridia;o__Clostridiales;f__unidentified_Clostridiales;g__unidentified_Clostridiales;s__Clostridium_moniliforme | 0.97 |
| OTU_110 | k__Bacteria;p__Bacteroidetes;c__Bacteroidia;o__Bacteroidales;f__Prevotellaceae;g__unidentified_Prevotellaceae;s__Prevotella_copri | 1 |
| OTU_111 | k__Bacteria;p__Firmicutes;c__Clostridia;o__Clostridiales;f__Ruminococcaceae;g__Flavonifractor;s__ | 0.87 |
| OTU_1477 | k__Bacteria;p__Bacteroidetes;c__Bacteroidia;o__Bacteroidales;f__Rikenellaceae;g__;s__ | 1 |
| OTU_118 | k__Bacteria;p__Bacteroidetes;c__Bacteroidia;o__Chitinophagales;f__Chitinophagaceae;g__;s__ | 0.86 |
| OTU_119 | k__Bacteria;p__Actinobacteria;c__unidentified_Actinobacteria;o__Corynebacteriales;f__Corynebacteriaceae;g__Lawsonella;s__ | 1 |
| OTU_1330 | k__Bacteria;p__Firmicutes;c__Clostridia;o__Clostridiales;f__Peptostreptococcaceae;g__Terrisporobacter;s__ | 0.86 |
| OTU_2818 | k__Bacteria;p__Proteobacteria;c__Gammaproteobacteria;o__Enterobacteriales;f__Enterobacteriaceae | 1 |
| OTU_2819 | k__Bacteria;p__Firmicutes;c__Clostridia;o__Clostridiales;f__Ruminococcaceae | 1 |
| OTU_2814 | k__Bacteria;p__Bacteroidetes;c__Bacteroidia;o__Bacteroidales;f__Prevotellaceae;g__;s__ | 0.96 |
| OTU_2815 | k__Bacteria;p__Proteobacteria;c__Alphaproteobacteria;o__Rhizobiales;f__unidentified_Rhizobiales;g__Arsenicitalea;s__ | 0.84 |
| OTU_2816 | k__Bacteria;p__Actinobacteria;c__unidentified_Actinobacteria;o__Frankiales;f__Nakamurellaceae;g__Nakamurella | 0.99 |
| OTU_2817 | k__Bacteria;p__Firmicutes;c__Clostridia;o__Clostridiales;f__Lachnospiraceae;g__unidentified_Lachnospiraceae;s__Clostridiales_bacterium_HAW-EB17 | 1 |
| OTU_2810 | k__Bacteria;p__Acidobacteria;c__;o__;f__;g__;s__ | 0.95 |
| OTU_2811 | k__Bacteria;p__Planctomycetes;c__Planctomycetacia;o__unidentified_Planctomycetacia;f__Gemmataceae;g__Fimbriiglobus;s__ | 0.87 |
| OTU_2812 | k__Bacteria;p__Cyanobacteria;c__unidentified_Cyanobacteria;o__unidentified_Cyanobacteria;f__unidentified_Cyanobacteria;g__unidentified_Cyanobacteria;s__Watanabea_reniformis | 0.82 |
| OTU_2813 | k__Bacteria;p__Cyanobacteria;c__unidentified_Cyanobacteria;o__unidentified_Cyanobacteria;f__unidentified_Cyanobacteria;g__unidentified_Cyanobacteria | 1 |
| OTU_340 | k__Bacteria;p__Firmicutes;c__Clostridia;o__Clostridiales;f__Lachnospiraceae;g__unidentified_Lachnospiraceae;s__Lachnospiraceae_bacterium_A4 | 0.8 |
| OTU_378 | k__Bacteria;p__Acidobacteria;c__Acidobacteriia;o__;f__;g__;s__ | 1 |
| OTU_379 | k__Bacteria;p__Proteobacteria;c__Gammaproteobacteria;o__Cellvibrionales;f__Halieaceae;g__;s__ | 0.88 |
| OTU_376 | k__Bacteria;p__Actinobacteria;c__Thermoleophilia;o__Solirubrobacterales;f__;g__;s__ | 0.82 |
| OTU_377 | k__Bacteria;p__Firmicutes;c__Clostridia;o__Clostridiales;f__Lachnospiraceae;g__Dorea;s__Dorea_formicigenerans | 1 |
| OTU_374 | k__Bacteria;p__Bacteroidetes;c__Bacteroidia;o__Chitinophagales;f__Chitinophagaceae;g__;s__ | 0.93 |
| OTU_968 | k__Bacteria;p__Proteobacteria;c__Gammaproteobacteria;o__unidentified_Gammaproteobacteria | 0.85 |
| OTU_372 | k__Bacteria;p__Actinobacteria;c__unidentified_Actinobacteria;o__Micrococcales;f__Cellulomonadaceae;g__Cellulomonas | 1 |
| OTU_373 | k__Bacteria;p__unidentified_Bacteria;c__unidentified_Bacteria;o__Campylobacterales;f__Helicobacteraceae;g__Helicobacter;s__Helicobacter_hepaticus | 1 |
| OTU_370 | k__Bacteria;p__Actinobacteria;c__Thermoleophilia;o__Solirubrobacterales;f__Solirubrobacteraceae;g__Conexibacter;s__ | 0.94 |
| OTU_371 | k__Bacteria;p__Bacteroidetes;c__Bacteroidia;o__Cytophagales;f__Hymenobacteraceae;g__Adhaeribacter | 1 |
| OTU_688 | k__Bacteria;p__Proteobacteria;c__Alphaproteobacteria;o__unidentified_Alphaproteobacteria;f__unidentified_Alphaproteobacteria;g__Reyranella;s__ | 0.81 |
| OTU_689 | k__Bacteria;p__Chloroflexi;c__Anaerolineae;o__;f__;g__;s__ | 0.99 |
| OTU_686 | k__Bacteria;p__Firmicutes;c__Clostridia;o__Clostridiales;f__Lachnospiraceae | 1 |
| OTU_687 | k__Bacteria;p__Firmicutes;c__Clostridia;o__Clostridiales;f__Lachnospiraceae | 1 |
| OTU_684 | k__Bacteria;p__Bacteroidetes;c__Bacteroidia;o__Bacteroidales;f__Bacteroidaceae;g__Bacteroides | 0.92 |
| OTU_685 | k__Bacteria;p__Acidobacteria;c__Acidobacteriia;o__Solibacterales;f__unidentified_Solibacterales;g__Bryobacter;s__ | 0.97 |
| OTU_682 | k__Bacteria;p__Actinobacteria;c__Acidimicrobiia;o__;f__;g__;s__ | 0.97 |
| OTU_683 | k__Bacteria;p__Chloroflexi;c__Chloroflexia;o__Chloroflexales;f__Roseiflexaceae;g__;s__ | 1 |
| OTU_680 | k__Bacteria;p__Chloroflexi;c__;o__;f__;g__;s__ | 0.88 |
| OTU_681 | k__Bacteria;p__Actinobacteria;c__Thermoleophilia;o__Solirubrobacterales;f__Solirubrobacteraceae | 1 |
| OTU_1527 | k__Bacteria | 0.93 |
| OTU_2920 | k__Bacteria;p__Planctomycetes;c__Planctomycetacia | 0.94 |
| OTU_2921 | k__Bacteria;p__Bacteroidetes;c__Bacteroidia;o__Bacteroidales | 0.96 |
| OTU_2922 | k__Bacteria;p__Acidobacteria;c__Acidobacteriia;o__Acidobacteriales | 1 |
| OTU_2923 | k__Bacteria;p__Bacteroidetes;c__Bacteroidia;o__Chitinophagales;f__Chitinophagaceae;g__Segetibacter;s__ | 1 |
| OTU_2924 | k__Bacteria;p__Bacteroidetes;c__Bacteroidia;o__Bacteroidales;f__Prevotellaceae | 1 |
| OTU_2925 | k__Bacteria;p__Proteobacteria;c__Gammaproteobacteria;o__Legionellales;f__Legionellaceae;g__Legionella | 1 |
| OTU_2926 | k__Bacteria;p__Acidobacteria;c__unidentified_Acidobacteria;o__unidentified_Acidobacteria;f__Pyrinomonadaceae | 1 |
| OTU_2927 | k__Bacteria | 1 |
| OTU_2928 | k__Bacteria;p__Gemmatimonadetes;c__unidentified_Gemmatimonadetes;o__Gemmatimonadales;f__Gemmatimonadaceae;g__Gemmatimonas | 0.8 |
| OTU_2929 | k__Bacteria;p__Cyanobacteria;c__unidentified_Cyanobacteria;o__Synechococcales | 1 |
| OTU_1520 | k__Archaea;p__unidentified_Archaea;c__unidentified_Archaea;o__unidentified_Archaea;f__unidentified_Archaea;g__unidentified_Archaea | 1 |
| OTU_978 | k__Bacteria;p__Latescibacteria;c__;o__;f__;g__;s__ | 0.99 |
| OTU_979 | k__Bacteria;p__Actinobacteria;c__Acidimicrobiia | 1 |
| OTU_1615 | k__Bacteria;p__Firmicutes;c__Negativicutes;o__Selenomonadales;f__Veillonellaceae;g__Dialister | 1 |
| OTU_1614 | k__Bacteria;p__Firmicutes;c__Clostridia;o__Clostridiales;f__Peptostreptococcaceae;g__Filifactor;s__ | 1 |
| OTU_219 | k__Bacteria;p__Bacteroidetes;c__Bacteroidia;o__Bacteroidales;f__Rikenellaceae;g__Alistipes;s__ | 1 |
| OTU_1523 | k__Bacteria;p__Firmicutes;c__Clostridia;o__Clostridiales;f__Ruminococcaceae;g__unidentified_Ruminococcaceae | 0.92 |
| OTU_1611 | k__Bacteria;p__Bacteroidetes;c__Bacteroidia | 1 |
| OTU_1610 | k__Bacteria | 1 |
| OTU_970 | k__Bacteria;p__Bacteroidetes;c__Bacteroidia;o__Flavobacteriales;f__Flavobacteriaceae;g__Marixanthomonas | 0.8 |
| OTU_971 | k__Bacteria | 1 |
| OTU_972 | k__Bacteria;p__Cyanobacteria;c__unidentified_Cyanobacteria;o__unidentified_Cyanobacteria;f__unidentified_Cyanobacteria;g__unidentified_Cyanobacteria;s__Nannochloropsis_gaditana | 1 |
| OTU_1522 | k__Bacteria;p__Proteobacteria;c__Deltaproteobacteria;o__unidentified_Deltaproteobacteria;f__Syntrophorhabdaceae;g__Syntrophorhabdus;s__ | 0.97 |
| OTU_974 | k__Bacteria;p__Proteobacteria;c__Gammaproteobacteria;o__unidentified_Gammaproteobacteria | 1 |
| OTU_975 | k__Bacteria;p__Firmicutes;c__Bacilli;o__Lactobacillales;f__Carnobacteriaceae;g__Carnobacterium;s__Carnobacterium_maltaromaticum | 0.99 |
| OTU_976 | k__Bacteria;p__Proteobacteria;c__Gammaproteobacteria;o__Xanthomonadales;f__Rhodanobacteraceae;g__;s__ | 0.98 |
| OTU_977 | k__Bacteria;p__Proteobacteria;c__Deltaproteobacteria;o__Myxococcales;f__Haliangiaceae;g__Haliangium;s__ | 0.87 |
| OTU_134 | k__Bacteria;p__Bacteroidetes;c__Bacteroidia;o__Bacteroidales;f__Paludibacteraceae | 1 |
| OTU_135 | k__Bacteria;p__Actinobacteria;c__unidentified_Actinobacteria;o__Micrococcales;f__Cellulomonadaceae;g__Oerskovia;s__Oerskovia_turbata | 0.92 |
| OTU_2804 | k__Bacteria;p__Acidobacteria;c__Acidobacteriia | 1 |
| OTU_136 | k__Bacteria;p__unidentified_Bacteria;c__unidentified_Bacteria;o__Campylobacterales;f__unidentified_Campylobacterales;g__Sulfurospirillum;s__ | 0.94 |
| OTU_1617 | k__Bacteria;p__Proteobacteria;c__Deltaproteobacteria;o__Myxococcales | 1 |
| OTU_218 | k__Bacteria;p__Firmicutes;c__Clostridia;o__Clostridiales;f__Lachnospiraceae;g__Catonella;s__ | 1 |
| OTU_137 | k__Bacteria;p__Proteobacteria;c__Gammaproteobacteria;o__unidentified_Gammaproteobacteria;f__Burkholderiaceae;g__Delftia | 0.91 |
| OTU_1616 | k__Bacteria | 1 |
| OTU_646 | k__Bacteria;p__Melainabacteria | 1 |
| OTU_2885 | k__Bacteria;p__Planctomycetes;c__Planctomycetacia;o__unidentified_Planctomycetacia;f__Gemmataceae;g__;s__ | 0.96 |
| OTU_647 | k__Bacteria;p__Planctomycetes;c__Planctomycetacia;o__unidentified_Planctomycetacia;f__unidentified_Planctomycetacia;g__unidentified_Planctomycetacia;s__Planctomycetaceae_bacterium_LX124 | 0.87 |
| OTU_2884 | k__Bacteria;p__Actinobacteria;c__unidentified_Actinobacteria;o__Frankiales;f__Acidothermaceae;g__Acidothermus;s__ | 0.96 |
| OTU_644 | k__Bacteria;p__Chlamydiae;c__unidentified_Chlamydiae;o__Chlamydiales | 1 |
| OTU_2219 | k__Bacteria;p__Firmicutes;c__Bacilli;o__Bacillales;f__Alicyclobacillaceae;g__Alicyclobacillus | 1 |
| OTU_1613 | k__Bacteria;p__Verrucomicrobia;c__Verrucomicrobiae;o__Chthoniobacterales;f__Chthoniobacteraceae;g__Chthoniobacter;s__ | 0.91 |
| OTU_645 | k__Bacteria;p__Proteobacteria;c__Alphaproteobacteria;o__Rhizobiales;f__Xanthobacteraceae;g__Variibacter;s__Variibacter_gotjawalensis | 0.89 |
| OTU_1612 | k__Bacteria;p__Proteobacteria;c__Gammaproteobacteria;o__unidentified_Gammaproteobacteria;f__Burkholderiaceae;g__Parasutterella;s__Burkholderiales_bacterium_YL45 | 1 |
| OTU_1109 | k__Bacteria;p__Proteobacteria;c__Gammaproteobacteria;o__unidentified_Gammaproteobacteria;f__Neisseriaceae;g__Kingella;s__ | 0.95 |
| OTU_1108 | k__Bacteria;p__Actinobacteria;c__Thermoleophilia;o__Gaiellales;f__;g__;s__ | 1 |
| OTU_1758 | k__Bacteria;p__Proteobacteria;c__Gammaproteobacteria;o__unidentified_Gammaproteobacteria;f__Burkholderiaceae;g__Lautropia;s__ | 1 |
| OTU_1103 | k__Bacteria;p__Firmicutes;c__Bacilli;o__Lactobacillales;f__Lactobacillaceae;g__Lactobacillus | 1 |
| OTU_1102 | k__Archaea;p__unidentified_Archaea;c__unidentified_Archaea;o__unidentified_Archaea;f__unidentified_Archaea;g__unidentified_Archaea;s__Lokiarchaeum_sp_GC14_75 | 0.88 |
| OTU_1101 | k__Bacteria;p__Fusobacteria;c__Fusobacteriia;o__Fusobacteriales;f__Fusobacteriaceae;g__Fusobacterium | 0.98 |
| OTU_876 | k__Bacteria;p__Acidobacteria;c__Holophagae;o__;f__;g__;s__ | 1 |
| OTU_1107 | k__Bacteria;p__Chloroflexi;c__Anaerolineae;o__Anaerolineales;f__Anaerolineaceae;g__;s__ | 0.92 |
| OTU_1106 | k__Bacteria;p__Elusimicrobia;c__;o__;f__;g__;s__ | 0.99 |
| OTU_1105 | k__Bacteria;p__Cyanobacteria;c__unidentified_Cyanobacteria | 0.97 |
| OTU_1104 | k__Bacteria;p__Acidobacteria | 1 |
| OTU_1756 | k__Bacteria;p__Proteobacteria;c__Deltaproteobacteria;o__Bradymonadales;f__;g__;s__ | 0.93 |
| OTU_190 | k__Bacteria;p__Cyanobacteria;c__unidentified_Cyanobacteria;o__unidentified_Cyanobacteria;f__unidentified_Cyanobacteria;g__unidentified_Cyanobacteria | 1 |
| OTU_2036 | k__Bacteria;p__Actinobacteria;c__unidentified_Actinobacteria;o__Corynebacteriales;f__Nocardiaceae;g__Gordonia | 0.97 |
| OTU_1757 | k__Bacteria;p__Actinobacteria;c__unidentified_Actinobacteria;o__Corynebacteriales;f__Nocardiaceae;g__Williamsia | 0.99 |
| OTU_973 | k__Bacteria;p__Actinobacteria;c__Acidimicrobiia | 1 |
| OTU_2037 | k__Bacteria;p__Firmicutes;c__Clostridia;o__Clostridiales;f__Lachnospiraceae | 0.96 |
| OTU_2887 | k__Bacteria;p__Acidobacteria;c__unidentified_Acidobacteria;o__unidentified_Acidobacteria;f__unidentified_Acidobacteria;g__unidentified_Acidobacteria;s__Acidobacteria_bacterium_SCN_69-37 | 0.87 |
| OTU_1619 | k__Bacteria;p__Bacteroidetes;c__Bacteroidia;o__Bacteroidales;f__Muribaculaceae;g__;s__ | 1 |
| OTU_1751 | k__Bacteria;p__Proteobacteria;c__Deltaproteobacteria;o__Myxococcales;f__Sandaracinaceae;g__;s__ | 0.91 |
| OTU_1046 | k__Bacteria;p__Chloroflexi;c__unidentified_Chloroflexi;o__unidentified_Chloroflexi;f__unidentified_Chloroflexi;g__unidentified_Chloroflexi;s__bacterium_Ellin6529 | 1 |
| OTU_1047 | k__Bacteria;p__Gemmatimonadetes;c__unidentified_Gemmatimonadetes;o__Gemmatimonadales;f__Gemmatimonadaceae;g__Gemmatimonas;s__ | 0.81 |
| OTU_1044 | k__Bacteria;p__Actinobacteria;c__Thermoleophilia;o__Solirubrobacterales;f__;g__;s__ | 1 |
| OTU_1045 | k__Bacteria;p__Bacteroidetes;c__Bacteroidia;o__Bacteroidales;f__Muribaculaceae;g__;s__ | 0.89 |
| OTU_1042 | k__Bacteria;p__Actinobacteria;c__Thermoleophilia;o__Solirubrobacterales;f__;g__;s__ | 1 |
| OTU_1043 | k__Bacteria;p__Firmicutes;c__Clostridia;o__Clostridiales | 0.87 |
| OTU_1040 | k__Bacteria;p__Proteobacteria;c__Gammaproteobacteria;o__Xanthomonadales;f__Xanthomonadaceae;g__Lysobacter | 1 |
| OTU_1041 | k__Bacteria;p__Proteobacteria;c__Alphaproteobacteria;o__Rhodospirillales;f__unidentified_Rhodospirillales;g__unidentified_Rhodospirillales | 0.82 |
| OTU_1048 | k__Bacteria;p__Planctomycetes;c__Planctomycetacia;o__unidentified_Planctomycetacia;f__Gemmataceae;g__;s__ | 0.86 |
| OTU_1049 | k__Archaea;p__Thaumarchaeota;c__Nitrososphaeria;o__;f__;g__;s__ | 1 |
| OTU_2886 | k__Bacteria;p__Proteobacteria;c__Gammaproteobacteria;o__Xanthomonadales | 0.84 |
| OTU_2714 | k__Bacteria;p__Firmicutes;c__Clostridia;o__Clostridiales;f__unidentified_Clostridiales;g__Anaerovorax | 0.89 |
| OTU_1747 | k__Bacteria;p__Proteobacteria;c__Gammaproteobacteria;o__Pasteurellales;f__Pasteurellaceae;g__Actinobacillus;s__[Haemophilus]_parasuis | 1 |
| OTU_1475 | k__Bacteria;p__Proteobacteria;c__Gammaproteobacteria;o__unidentified_Gammaproteobacteria;f__Ectothiorhodospiraceae;g__;s__ | 1 |
| OTU_417 | k__Bacteria;p__Proteobacteria;c__Gammaproteobacteria;o__unidentified_Gammaproteobacteria;f__Neisseriaceae;g__Neisseria;s__Neisseria_subflava | 0.97 |
| OTU_1579 | k__Bacteria;p__Firmicutes;c__Clostridia;o__Clostridiales;f__Ruminococcaceae | 0.95 |
| OTU_3029 | k__Bacteria;p__Cyanobacteria;c__unidentified_Cyanobacteria;o__Nostocales | 1 |
| OTU_1824 | k__Bacteria;p__Proteobacteria;c__Deltaproteobacteria;o__Desulfovibrionales;f__Desulfovibrionaceae;g__Desulfovibrio;s__Desulfovibrio_marinus | 0.94 |
| OTU_1825 | k__Bacteria;p__Chlamydiae;c__unidentified_Chlamydiae;o__Chlamydiales;f__Parachlamydiaceae | 0.97 |
| OTU_1826 | k__Bacteria;p__Planctomycetes;c__Planctomycetacia;o__unidentified_Planctomycetacia;f__Isosphaeraceae;g__Aquisphaera;s__ | 0.97 |
| OTU_1827 | k__Bacteria;p__Acidobacteria;c__Acidobacteriia;o__Acidobacteriales;f__unidentified_Acidobacteriales;g__Granulicella;s__ | 1 |
| OTU_1820 | k__Bacteria;p__Proteobacteria;c__Gammaproteobacteria | 1 |
| OTU_1821 | k__Bacteria;p__Proteobacteria;c__Deltaproteobacteria;o__Myxococcales;f__Haliangiaceae;g__Haliangium | 0.83 |
| OTU_1822 | k__Bacteria;p__Proteobacteria;c__Alphaproteobacteria | 0.83 |
| OTU_1823 | k__Bacteria;p__Proteobacteria;c__Alphaproteobacteria;o__unidentified_Alphaproteobacteria;f__Acetobacteraceae;g__Rubritepida;s__ | 0.85 |
| OTU_2883 | k__Bacteria;p__Cyanobacteria;c__unidentified_Cyanobacteria;o__Nostocales;f__unidentified_Nostocales;g__unidentified_Nostocales;s__Chroococcidiopsis_sp_SAG_2025 | 1 |
| OTU_1828 | k__Bacteria;p__Planctomycetes;c__Planctomycetacia;o__Planctomycetales;f__;g__;s__ | 0.97 |
| OTU_1829 | k__Bacteria | 1 |
| OTU_818 | k__Bacteria;p__Firmicutes;c__Clostridia;o__Clostridiales;f__Lachnospiraceae | 1 |
| OTU_1081 | k__Bacteria;p__Proteobacteria;c__Deltaproteobacteria;o__Myxococcales;f__Archangiaceae;g__Anaeromyxobacter | 0.98 |
| OTU_2249 | k__Bacteria;p__Proteobacteria;c__Gammaproteobacteria;o__unidentified_Gammaproteobacteria;f__Woeseiaceae;g__Woeseia;s__ | 0.84 |
| OTU_58 | k__Bacteria;p__Fusobacteria;c__Fusobacteriia;o__Fusobacteriales;f__Fusobacteriaceae;g__Fusobacterium;s__Fusobacterium_mortiferum | 0.87 |
| OTU_2792 | k__Bacteria;p__Firmicutes;c__Clostridia;o__Clostridiales | 0.96 |
| OTU_2241 | k__Bacteria;p__Bacteroidetes;c__Bacteroidia;o__Flavobacteriales;f__Flavobacteriaceae;g__unidentified_Flavobacteriaceae;s__bacterium_WHC3-2 | 1 |
| OTU_2882 | k__Bacteria;p__Proteobacteria;c__Gammaproteobacteria;o__Cellvibrionales;f__Cellvibrionaceae;g__Aestuariicella;s__ | 1 |
| OTU_2243 | k__Bacteria;p__Proteobacteria;c__Alphaproteobacteria;o__Sneathiellales;f__Sneathiellaceae;g__Taonella;s__ | 1 |
| OTU_2242 | k__Bacteria;p__Planctomycetes;c__Planctomycetacia;o__unidentified_Planctomycetacia;f__Gemmataceae;g__Fimbriiglobus;s__ | 0.94 |
| OTU_2245 | k__Bacteria;p__Kiritimatiellaeota;c__Kiritimatiellae;o__;f__;g__;s__ | 1 |
| OTU_2244 | k__Bacteria;p__Proteobacteria;c__Gammaproteobacteria;o__Pseudomonadales;f__Moraxellaceae;g__Cavicella;s__ | 1 |
| OTU_2247 | k__Bacteria;p__Proteobacteria;c__Gammaproteobacteria;o__Oceanospirillales | 0.81 |
| OTU_2246 | k__Bacteria;p__Actinobacteria;c__Acidimicrobiia;o__;f__;g__;s__ | 0.92 |
| OTU_1910 | k__Bacteria;p__Proteobacteria;c__Alphaproteobacteria;o__Rickettsiales | 0.85 |
| OTU_1911 | k__Bacteria;p__Chloroflexi;c__Anaerolineae;o__Anaerolineales;f__Anaerolineaceae;g__;s__ | 0.91 |
| OTU_1912 | k__Bacteria;p__Proteobacteria;c__Alphaproteobacteria;o__Sphingomonadales;f__Sphingomonadaceae | 1 |
| OTU_1913 | k__Bacteria;p__Actinobacteria;c__unidentified_Actinobacteria;o__Micrococcales;f__Microbacteriaceae;g__Candidatus_Planktoluna;s__ | 1 |
| OTU_1914 | k__Bacteria;p__Proteobacteria;c__Gammaproteobacteria | 0.98 |
| OTU_1915 | k__Bacteria;p__Cyanobacteria;c__unidentified_Cyanobacteria;o__unidentified_Cyanobacteria;f__unidentified_Cyanobacteria;g__unidentified_Cyanobacteria | 0.99 |
| OTU_1916 | k__Bacteria;p__Firmicutes;c__Clostridia;o__Clostridiales;f__unidentified_Clostridiales;g__unidentified_Clostridiales | 1 |
| OTU_1917 | k__Bacteria;p__Actinobacteria;c__Coriobacteriia;o__Coriobacteriales;f__Eggerthellaceae;g__Enterorhabdus;s__ | 0.96 |
| OTU_1918 | k__Bacteria | 1 |
| OTU_1919 | k__Bacteria;p__Firmicutes;c__Clostridia;o__Thermoanaerobacterales;f__unidentified_Thermoanaerobacterales;g__Thermoanaerobacterium;s__ | 0.99 |
| OTU_2881 | k__Bacteria;p__Firmicutes;c__Clostridia;o__Clostridiales;f__Lachnospiraceae;g__Vallitalea;s__ | 1 |
| OTU_2652 | k__Bacteria;p__Cyanobacteria;c__unidentified_Cyanobacteria;o__unidentified_Cyanobacteria;f__unidentified_Cyanobacteria;g__unidentified_Cyanobacteria;s__Bambusa_oldhamii | 1 |
| OTU_2121 | k__Bacteria;p__Bacteroidetes;c__Bacteroidia;o__Chitinophagales;f__Chitinophagaceae | 1 |
| OTU_52 | k__Bacteria;p__Actinobacteria;c__unidentified_Actinobacteria;o__Propionibacteriales;f__Nocardioidaceae;g__Nocardioides | 1 |
| OTU_53 | k__Bacteria;p__Proteobacteria;c__Gammaproteobacteria;o__Xanthomonadales;f__Xanthomonadaceae;g__Stenotrophomonas;s__Stenotrophomonas_rhizophila | 1 |
| OTU_2029 | k__Bacteria;p__Planctomycetes;c__Planctomycetacia;o__;f__;g__;s__ | 0.98 |
| OTU_2028 | k__Bacteria;p__Proteobacteria;c__Alphaproteobacteria;o__unidentified_Alphaproteobacteria;f__unidentified_Alphaproteobacteria | 0.91 |
| OTU_2025 | k__Bacteria;p__Bacteroidetes;c__Bacteroidia;o__Bacteroidales | 0.92 |
| OTU_2656 | k__Bacteria;p__Proteobacteria;c__Gammaproteobacteria;o__unidentified_Gammaproteobacteria;f__Burkholderiaceae;g__Limnohabitans | 0.83 |
| OTU_2027 | k__Bacteria;p__Proteobacteria;c__Alphaproteobacteria;o__Sphingomonadales;f__Sphingomonadaceae;g__Sphingoaurantiacus;s__ | 1 |
| OTU_2026 | k__Bacteria;p__Acidobacteria;c__unidentified_Acidobacteria;o__unidentified_Acidobacteria;f__Pyrinomonadaceae;g__;s__ | 0.99 |
| OTU_2021 | k__Bacteria;p__Firmicutes;c__Negativicutes;o__Selenomonadales;f__Veillonellaceae;g__Megamonas;s__ | 0.83 |
| OTU_2020 | k__Bacteria;p__Proteobacteria;c__Alphaproteobacteria;o__unidentified_Alphaproteobacteria;f__unidentified_Alphaproteobacteria;g__Tistrella;s__Tistrella_mobilis | 1 |
| OTU_2023 | k__Bacteria;p__Proteobacteria;c__Deltaproteobacteria;o__Oligoflexales;f__Oligoflexaceae;g__Silvanigrella | 0.88 |
| OTU_2657 | k__Bacteria;p__Firmicutes;c__Clostridia;o__Clostridiales;f__Ruminococcaceae;g__Caproiciproducens | 0.81 |
| OTU_2227 | k__Bacteria;p__Firmicutes;c__Bacilli;o__Bacillales;f__Paenibacillaceae;g__Paenibacillus | 0.93 |
| OTU_2654 | k__Bacteria;p__Firmicutes;c__Clostridia;o__Clostridiales;f__unidentified_Clostridiales | 0.81 |
| OTU_1439 | k__Bacteria;p__Proteobacteria;c__Gammaproteobacteria;o__unidentified_Gammaproteobacteria;f__Burkholderiaceae;g__Pseudoduganella;s__ | 0.94 |
| OTU_2655 | k__Bacteria;p__Gemmatimonadetes;c__unidentified_Gemmatimonadetes;o__unidentified_Gemmatimonadetes;f__unidentified_Gemmatimonadetes;g__unidentified_Gemmatimonadetes;s__saltmarsh_clone_LCP-68 | 0.81 |
| OTU_2757 | k__Bacteria;p__Actinobacteria;c__Coriobacteriia;o__Coriobacteriales;f__Atopobiaceae;g__Olsenella;s__bacterium_OL-1 | 0.94 |
| OTU_2756 | k__Bacteria;p__Chloroflexi;c__unidentified_Chloroflexi;o__unidentified_Chloroflexi;f__unidentified_Chloroflexi;g__unidentified_Chloroflexi | 0.97 |
| OTU_2755 | k__Bacteria;p__Bacteroidetes;c__Bacteroidia;o__Bacteroidales;f__Marinifilaceae;g__Odoribacter | 1 |
| OTU_2754 | k__Bacteria;p__Firmicutes;c__Clostridia;o__Clostridiales;f__Lachnospiraceae;g__unidentified_Lachnospiraceae;s__Clostridium_sp_L2-50 | 0.97 |
| OTU_2753 | k__Bacteria;p__Bacteroidetes;c__Bacteroidia;o__Cytophagales;f__Hymenobacteraceae;g__Hymenobacter | 1 |
| OTU_2752 | k__Bacteria;p__unidentified_Bacteria;c__unidentified_Bacteria;o__unidentified_Bacteria;f__unidentified_Bacteria;g__Candidatus_Saccharimonas;s__ | 1 |
| OTU_2751 | k__Bacteria;p__Acidobacteria;c__unidentified_Acidobacteria;o__unidentified_Acidobacteria;f__unidentified_Acidobacteria;g__unidentified_Acidobacteria;s__Acidobacteria_bacterium_RBG_16_70_10 | 0.8 |
| OTU_2750 | k__Bacteria;p__Firmicutes;c__Clostridia;o__Clostridiales | 1 |
| OTU_2759 | k__Bacteria;p__Firmicutes;c__Clostridia;o__Clostridiales;f__Christensenellaceae;g__;s__ | 1 |
| OTU_2758 | k__Bacteria;p__Firmicutes;c__Clostridia;o__Clostridiales | 0.93 |
| OTU_2612 | k__Bacteria;p__Proteobacteria;c__Gammaproteobacteria;o__unidentified_Gammaproteobacteria;f__Burkholderiaceae | 1 |
| OTU_2111 | k__Bacteria;p__Actinobacteria;c__Thermoleophilia;o__Solirubrobacterales;f__Solirubrobacteraceae;g__unidentified_Solirubrobacteraceae;s__Phytoplasma_sp_RYL-GD | 0.95 |
| OTU_2110 | k__Bacteria;p__Acidobacteria;c__unidentified_Acidobacteria;o__unidentified_Acidobacteria;f__unidentified_Acidobacteria;g__Blastocatella;s__ | 0.8 |
| OTU_2113 | k__Bacteria;p__Bacteroidetes;c__Bacteroidia;o__Bacteroidales | 0.93 |
| OTU_2112 | k__Bacteria;p__Proteobacteria | 0.94 |
| OTU_2115 | k__Bacteria;p__Proteobacteria;c__Alphaproteobacteria;o__Rhodobacterales;f__Rhodobacteraceae;g__Palleronia;s__Palleronia_marisminoris | 0.94 |
| OTU_2114 | k__Bacteria;p__Gracilibacteria;c__;o__;f__;g__;s__ | 0.98 |
| OTU_2117 | k__Bacteria | 1 |
| OTU_2116 | k__Bacteria;p__unidentified_Bacteria;c__unidentified_Bacteria;o__Campylobacterales;f__unidentified_Campylobacterales;g__Sulfurovum | 1 |
| OTU_2119 | k__Bacteria;p__Bacteroidetes;c__Bacteroidia;o__Bacteroidales;f__Rikenellaceae;g__;s__ | 0.99 |
| OTU_2118 | k__Bacteria;p__Chloroflexi;c__Anaerolineae;o__Anaerolineales;f__Anaerolineaceae;g__;s__ | 0.94 |
| OTU_1442 | k__Bacteria;p__Actinobacteria;c__unidentified_Actinobacteria;o__Bifidobacteriales;f__Bifidobacteriaceae;g__Bifidobacterium | 0.95 |
| OTU_1443 | k__Bacteria;p__Firmicutes;c__Bacilli;o__Bacillales;f__Alicyclobacillaceae;g__Tumebacillus | 1 |
| OTU_1440 | k__Bacteria;p__Planctomycetes;c__Planctomycetacia;o__unidentified_Planctomycetacia;f__Gemmataceae;g__Gemmata | 1 |
| OTU_1441 | k__Bacteria | 1 |
| OTU_1446 | k__Bacteria;p__Bacteroidetes;c__Bacteroidia;o__Chitinophagales;f__Chitinophagaceae;g__Terrimonas | 0.94 |
| OTU_1447 | k__Bacteria;p__Proteobacteria;c__Deltaproteobacteria;o__Myxococcales | 1 |
| OTU_1444 | k__Bacteria;p__Bacteroidetes;c__Bacteroidia;o__Bacteroidales;f__Tannerellaceae;g__Parabacteroides | 0.99 |
| OTU_1445 | k__Bacteria;p__Actinobacteria;c__unidentified_Actinobacteria;o__Micrococcales;f__Promicromonosporaceae;g__Promicromonospora | 1 |
| OTU_765 | k__Bacteria;p__Bacteroidetes;c__Bacteroidia;o__Bacteroidales;f__Muribaculaceae;g__;s__ | 0.98 |
| OTU_764 | k__Bacteria;p__Proteobacteria;c__Alphaproteobacteria;o__Sphingomonadales;f__Sphingomonadaceae;g__Sphingomonas | 0.98 |
| OTU_1448 | k__Bacteria;p__Bacteroidetes;c__Bacteroidia;o__Bacteroidales;f__Porphyromonadaceae;g__Porphyromonas | 1 |
| OTU_1449 | k__Bacteria;p__Bacteroidetes;c__Bacteroidia;o__Flavobacteriales;f__unidentified_Flavobacteriales;g__Chryseobacterium | 1 |
| OTU_761 | k__Bacteria;p__Bacteroidetes;c__Bacteroidia;o__Bacteroidales;f__;g__;s__ | 0.94 |
| OTU_760 | k__Bacteria;p__Bacteroidetes;c__Bacteroidia;o__Bacteroidales | 1 |
| OTU_763 | k__Bacteria;p__Actinobacteria;c__Acidimicrobiia | 1 |
| OTU_762 | k__Bacteria;p__Actinobacteria;c__Acidimicrobiia;o__;f__;g__;s__ | 0.98 |
| OTU_1417 | k__Bacteria;p__Chloroflexi;c__Ktedonobacteria;o__Ktedonobacterales;f__;g__;s__ | 0.99 |
| OTU_569 | k__Bacteria;p__Cyanobacteria | 1 |
| OTU_568 | k__Bacteria;p__Actinobacteria;c__unidentified_Actinobacteria;o__Propionibacteriales;f__Nocardioidaceae;g__Nocardioides | 0.85 |
| OTU_567 | k__Bacteria;p__Proteobacteria;c__Gammaproteobacteria;o__Pasteurellales;f__Pasteurellaceae | 1 |
| OTU_566 | k__Bacteria;p__Bacteroidetes;c__Bacteroidia;o__Bacteroidales;f__Muribaculaceae;g__;s__ | 1 |
| OTU_565 | k__Bacteria;p__Proteobacteria;c__Gammaproteobacteria;o__unidentified_Gammaproteobacteria;f__Nitrosomonadaceae;g__;s__ | 1 |
| OTU_739 | k__Bacteria;p__Proteobacteria;c__Gammaproteobacteria;o__unidentified_Gammaproteobacteria;f__unidentified_Gammaproteobacteria;g__unidentified_Gammaproteobacteria;s__bacterium_endosymbiont_of_Onthophagus_Taurus | 0.97 |
| OTU_563 | k__Bacteria;p__Actinobacteria;c__Thermoleophilia;o__Solirubrobacterales;f__Solirubrobacteraceae;g__Conexibacter | 1 |
| OTU_562 | k__Bacteria;p__Firmicutes;c__Clostridia;o__Clostridiales;f__Ruminococcaceae;g__Caproiciproducens | 0.98 |
| OTU_561 | k__Bacteria;p__Firmicutes;c__Clostridia;o__Clostridiales;f__Ruminococcaceae;g__unidentified_Ruminococcaceae;s__Firmicutes_bacterium_ASF500 | 0.99 |
| OTU_560 | k__Bacteria;p__Bacteroidetes;c__Bacteroidia;o__Bacteroidales;f__Muribaculaceae;g__;s__ | 0.85 |
| OTU_1550 | k__Bacteria;p__Bacteroidetes;c__Bacteroidia;o__Bacteroidales;f__Muribaculaceae;g__;s__ | 1 |
| OTU_1551 | k__Bacteria;p__Armatimonadetes;c__Chthonomonadetes;o__Chthonomonadales;f__;g__;s__ | 1 |
| OTU_1552 | k__Bacteria;p__Firmicutes;c__Clostridia;o__Clostridiales;f__Lachnospiraceae;g__unidentified_Lachnospiraceae;s__[Ruminococcus]_gnavus | 0.93 |
| OTU_94 | k__Bacteria;p__Firmicutes;c__Clostridia;o__Clostridiales;f__unidentified_Clostridiales;g__unidentified_Clostridiales | 1 |
| OTU_162 | k__Bacteria;p__Actinobacteria;c__unidentified_Actinobacteria;o__Corynebacteriales;f__Corynebacteriaceae;g__unidentified_Corynebacteriaceae;s__Corynebacterium_mucifaciens | 1 |
| OTU_161 | k__Bacteria;p__Proteobacteria;c__Alphaproteobacteria;o__unidentified_Alphaproteobacteria;f__unidentified_Alphaproteobacteria;g__unidentified_Alphaproteobacteria;s__Candidatus_Pelagibacter_ubique | 0.97 |
| OTU_1553 | k__Bacteria;p__Bacteroidetes;c__Bacteroidia;o__Sphingobacteriales;f__Sphingobacteriaceae;g__Mucilaginibacter | 1 |
| OTU_90 | k__Bacteria;p__Proteobacteria;c__Gammaproteobacteria;o__Pseudomonadales;f__Moraxellaceae;g__Psychrobacter;s__Psychrobacter_nivimaris | 0.91 |
| OTU_91 | k__Bacteria;p__Firmicutes;c__Bacilli;o__Lactobacillales;f__Lactobacillaceae;g__Lactobacillus;s__Lactobacillus_reuteri | 0.97 |
| OTU_92 | k__Bacteria;p__Bacteroidetes;c__Bacteroidia;o__Bacteroidales;f__Porphyromonadaceae;g__Porphyromonas;s__Porphyromonas_endodontalis | 1 |
| OTU_93 | k__Bacteria;p__Firmicutes;c__Clostridia;o__Clostridiales;f__Lachnospiraceae | 1 |
| OTU_1554 | k__Bacteria;p__Actinobacteria;c__Acidimicrobiia;o__unidentified_Acidimicrobiia;f__Iamiaceae;g__Iamia | 0.97 |
| OTU_169 | k__Bacteria;p__unidentified_Bacteria;c__unidentified_Bacteria;o__Campylobacterales;f__Campylobacteraceae;g__Campylobacter;s__Campylobacter_showae | 1 |
| OTU_168 | k__Bacteria;p__Firmicutes;c__Bacilli;o__Lactobacillales;f__Streptococcaceae;g__Lactococcus | 1 |
| OTU_98 | k__Bacteria;p__Proteobacteria;c__Gammaproteobacteria;o__Aeromonadales;f__Aeromonadaceae;g__Aeromonas;s__Aeromonas_veronii | 0.91 |
| OTU_99 | k__Bacteria;p__Proteobacteria;c__Gammaproteobacteria;o__Oceanospirillales;f__Alcanivoracaceae;g__Alcanivorax | 1 |
| OTU_1555 | k__Bacteria;p__Firmicutes;c__Clostridia;o__Clostridiales;f__unidentified_Clostridiales;g__unidentified_Clostridiales;s__Clostridium_amylolyticum | 0.98 |
| OTU_1526 | k__Bacteria;p__Proteobacteria;c__Gammaproteobacteria;o__unidentified_Gammaproteobacteria | 0.93 |
| OTU_1100 | k__Bacteria;p__Bacteroidetes;c__Bacteroidia;o__Flavobacteriales;f__;g__;s__ | 0.97 |
| OTU_639 | k__Bacteria;p__Proteobacteria;c__Alphaproteobacteria;o__unidentified_Alphaproteobacteria;f__unidentified_Alphaproteobacteria;g__unidentified_Alphaproteobacteria;s__alpha_proteobacterium_SCGC_AAA015-N04 | 1 |
| OTU_2809 | k__Bacteria;p__Cyanobacteria;c__unidentified_Cyanobacteria;o__unidentified_Cyanobacteria;f__unidentified_Cyanobacteria;g__unidentified_Cyanobacteria | 1 |
| OTU_2808 | k__Bacteria;p__Cyanobacteria;c__unidentified_Cyanobacteria;o__unidentified_Cyanobacteria;f__unidentified_Cyanobacteria;g__unidentified_Cyanobacteria | 1 |
| OTU_2807 | k__Bacteria;p__Actinobacteria | 0.82 |
| OTU_2806 | k__Bacteria;p__Firmicutes;c__Clostridia;o__Clostridiales;f__Ruminococcaceae | 0.99 |
| OTU_2805 | k__Bacteria;p__Actinobacteria;c__unidentified_Actinobacteria;o__Propionibacteriales;f__Propionibacteriaceae;g__Tessaracoccus | 0.94 |
| OTU_1557 | k__Bacteria;p__Actinobacteria;c__unidentified_Actinobacteria;o__Frankiales;f__;g__;s__ | 1 |
| OTU_2803 | k__Bacteria;p__Firmicutes;c__Clostridia;o__Clostridiales | 0.97 |
| OTU_2802 | k__Bacteria;p__Actinobacteria;c__unidentified_Actinobacteria | 0.99 |
| OTU_2801 | k__Bacteria;p__Planctomycetes;c__Planctomycetacia | 0.99 |
| OTU_2800 | k__Bacteria | 1 |
| OTU_1558 | k__Bacteria;p__Bacteroidetes;c__Bacteroidia;o__Sphingobacteriales;f__Sphingobacteriaceae;g__Pedobacter | 0.81 |
| OTU_309 | k__Bacteria;p__Firmicutes;c__Clostridia;o__Clostridiales;f__unidentified_Clostridiales;g__unidentified_Clostridiales;s__endosymbiont_TC1_of_Trimyema_compressum | 1 |
| OTU_308 | k__Bacteria;p__Proteobacteria;c__Alphaproteobacteria;o__unidentified_Alphaproteobacteria;f__unidentified_Alphaproteobacteria | 0.96 |
| OTU_1559 | k__Bacteria;p__Acidobacteria;c__unidentified_Acidobacteria;o__unidentified_Acidobacteria;f__unidentified_Acidobacteria;g__unidentified_Acidobacteria;s__Acidobacteria_bacterium_SCN_69-37 | 0.93 |
| OTU_303 | k__Bacteria;p__Proteobacteria;c__Alphaproteobacteria;o__Sphingomonadales;f__Sphingomonadaceae;g__Sphingomonas;s__Sphingomonas_jaspsi | 0.93 |
| OTU_302 | k__Bacteria;p__Firmicutes;c__Clostridia;o__Clostridiales;f__unidentified_Clostridiales;g__Anaerosalibacter;s__Anaerosalibacter_bizertensis | 0.99 |
| OTU_301 | k__Bacteria;p__Actinobacteria;c__Thermoleophilia;o__Gaiellales;f__;g__;s__ | 0.8 |
| OTU_300 | k__Bacteria;p__Actinobacteria;c__Acidimicrobiia | 1 |
| OTU_307 | k__Bacteria;p__Firmicutes;c__Clostridia;o__Clostridiales;f__Lachnospiraceae;g__unidentified_Lachnospiraceae;s__[Clostridium]_colinum | 0.99 |
| OTU_306 | k__Bacteria;p__Actinobacteria;c__Thermoleophilia;o__Gaiellales;f__;g__;s__ | 0.99 |
| OTU_305 | k__Bacteria;p__Firmicutes;c__Clostridia;o__Clostridiales;f__Lachnospiraceae | 1 |
| OTU_304 | k__Bacteria;p__unidentified_Bacteria;c__unidentified_Bacteria;o__unidentified_Bacteria;f__unidentified_Bacteria;g__unidentified_Bacteria | 0.87 |
| OTU_1521 | k__Bacteria;p__Proteobacteria;c__Deltaproteobacteria;o__Bdellovibrionales;f__Bdellovibrionaceae;g__;s__ | 1 |
| OTU_1595 | k__Bacteria;p__Bacteroidetes;c__Bacteroidia;o__Cytophagales;f__Cyclobacteriaceae | 0.96 |
| OTU_1596 | k__Bacteria;p__Chloroflexi;c__;o__;f__;g__;s__ | 0.96 |
| OTU_1597 | k__Bacteria;p__Actinobacteria;c__unidentified_Actinobacteria;o__Corynebacteriales;f__Corynebacteriaceae;g__unidentified_Corynebacteriaceae | 0.88 |
| OTU_1590 | k__Bacteria;p__Bacteroidetes;c__Bacteroidia;o__Cytophagales;f__Microscillaceae;g__Ohtaekwangia;s__Globodera_pallida | 0.97 |
| OTU_1591 | k__Bacteria;p__Gemmatimonadetes;c__unidentified_Gemmatimonadetes;o__Gemmatimonadales;f__Gemmatimonadaceae;g__Gemmatirosa;s__ | 0.99 |
| OTU_1592 | k__Bacteria;p__Proteobacteria;c__Gammaproteobacteria;o__unidentified_Gammaproteobacteria;f__unidentified_Gammaproteobacteria;g__Acidibacter | 1 |
| OTU_1593 | k__Bacteria;p__Firmicutes;c__Negativicutes;o__Selenomonadales;f__Veillonellaceae;g__Sporomusa;s__ | 1 |
| OTU_950 | k__Bacteria;p__Firmicutes;c__Clostridia;o__Clostridiales;f__Ruminococcaceae | 0.99 |
| OTU_1598 | k__Bacteria;p__Firmicutes;c__Bacilli;o__Bacillales;f__Paenibacillaceae;g__Cohnella | 0.99 |
| OTU_1599 | k__Bacteria;p__Bacteroidetes;c__Bacteroidia;o__Chitinophagales;f__Chitinophagaceae | 1 |
| OTU_1669 | k__Bacteria;p__Fusobacteria;c__Fusobacteriia;o__Fusobacteriales;f__Fusobacteriaceae;g__Fusobacterium;s__Fusobacterium_mortiferum | 0.82 |
| OTU_829 | k__Bacteria;p__Proteobacteria;c__Alphaproteobacteria;o__Caulobacterales;f__Parvularculaceae;g__Parvularcula | 0.83 |
| OTU_2889 | k__Bacteria;p__Firmicutes;c__Clostridia;o__Clostridiales;f__unidentified_Clostridiales;g__Tissierella;s__Tissierella_creatinini | 0.89 |
| OTU_945 | k__Bacteria;p__Proteobacteria;c__Gammaproteobacteria;o__Pseudomonadales;f__Moraxellaceae;g__Acinetobacter;s__Acinetobacter_ursingii | 0.97 |
| OTU_416 | k__Bacteria;p__Planctomycetes;c__Phycisphaerae;o__Phycisphaerales;f__Phycisphaeraceae;g__;s__ | 0.98 |
| OTU_2931 | k__Bacteria;p__Actinobacteria;c__Rubrobacteria;o__Rubrobacterales;f__unidentified_Rubrobacterales;g__Rubrobacter;s__ | 1 |
| OTU_946 | k__Bacteria;p__Firmicutes;c__Clostridia;o__Clostridiales;f__Ruminococcaceae | 0.98 |
| OTU_941 | k__Bacteria;p__Actinobacteria;c__Coriobacteriia;o__Coriobacteriales;f__Eggerthellaceae;g__Enterorhabdus;s__ | 1 |
| OTU_940 | k__Bacteria;p__Proteobacteria;c__Gammaproteobacteria;o__Pseudomonadales;f__Moraxellaceae;g__Moraxella;s__Moraxella_catarrhalis | 0.82 |
| OTU_2935 | k__Bacteria;p__Proteobacteria;c__Alphaproteobacteria;o__Rhizobiales;f__unidentified_Rhizobiales;g__Labrys;s__ | 0.8 |
| OTU_410 | k__Bacteria;p__Firmicutes;c__Clostridia;o__Clostridiales;f__Ruminococcaceae | 1 |
| OTU_1622 | k__Bacteria;p__Proteobacteria;c__Alphaproteobacteria | 0.95 |
| OTU_1623 | k__Bacteria;p__Actinobacteria;c__Thermoleophilia;o__Solirubrobacterales;f__;g__;s__ | 0.99 |
| OTU_2939 | k__Bacteria;p__Bacteroidetes;c__Bacteroidia;o__Flavobacteriales;f__Flavobacteriaceae;g__Nonlabens;s__ | 1 |
| OTU_2938 | k__Bacteria;p__Bacteroidetes;c__Bacteroidia;o__Chitinophagales;f__Chitinophagaceae;g__Dinghuibacter;s__ | 0.99 |
| OTU_1626 | k__Bacteria;p__Acidobacteria;c__Acidobacteriia;o__Acidobacteriales;f__;g__;s__ | 0.85 |
| OTU_1627 | k__Bacteria;p__Proteobacteria;c__Gammaproteobacteria;o__unidentified_Gammaproteobacteria;f__unidentified_Gammaproteobacteria;g__unidentified_Gammaproteobacteria;s__Rhodobacteraceae_bacterium_REDSEA-S29_B10 | 0.94 |
| OTU_1624 | k__Bacteria;p__Acidobacteria;c__unidentified_Acidobacteria;o__unidentified_Acidobacteria;f__unidentified_Acidobacteria;g__unidentified_Acidobacteria;s__Acidobacteria_bacterium_SCN_69-37 | 0.99 |
| OTU_1625 | k__Bacteria;p__Actinobacteria;c__Thermoleophilia;o__Gaiellales;f__;g__;s__ | 0.88 |
| OTU_787 | k__Bacteria;p__Actinobacteria;c__unidentified_Actinobacteria;o__Micrococcales;f__Micrococcaceae;g__Kocuria;s__Kocuria_kristinae | 1 |
| OTU_786 | k__Bacteria;p__Chloroflexi;c__Chloroflexia;o__Thermomicrobiales;f__;g__;s__ | 1 |
| OTU_785 | k__Bacteria;p__Proteobacteria;c__Alphaproteobacteria;o__Rhizobiales;f__Hyphomicrobiaceae | 1 |
| OTU_784 | k__Bacteria;p__Verrucomicrobia;c__Verrucomicrobiae;o__;f__;g__;s__ | 1 |
| OTU_783 | k__Bacteria;p__Verrucomicrobia;c__Verrucomicrobiae;o__unidentified_Verrucomicrobiae;f__unidentified_Verrucomicrobiae;g__Pedosphaera;s__ | 1 |
| OTU_782 | k__Bacteria;p__Proteobacteria;c__Alphaproteobacteria;o__unidentified_Alphaproteobacteria;f__Acetobacteraceae | 1 |
| OTU_781 | k__Bacteria;p__Proteobacteria;c__Gammaproteobacteria | 0.99 |
| OTU_780 | k__Bacteria;p__Acidobacteria;c__unidentified_Acidobacteria;o__unidentified_Acidobacteria;f__unidentified_Acidobacteria;g__Stenotrophobacter;s__ | 1 |
| OTU_1667 | k__Bacteria;p__Bacteroidetes;c__Bacteroidia;o__Flavobacteriales;f__;g__;s__ | 0.9 |
| OTU_789 | k__Bacteria;p__Proteobacteria;c__Gammaproteobacteria;o__Xanthomonadales;f__Rhodanobacteraceae;g__Pseudofulvimonas;s__ | 1 |
| OTU_788 | k__Bacteria;p__Nitrospirae;c__Nitrospira;o__Nitrospirales;f__Nitrospiraceae;g__unidentified_Nitrospiraceae | 0.87 |
| OTU_1138 | k__Bacteria;p__Firmicutes;c__Clostridia;o__Clostridiales;f__Lachnospiraceae | 1 |
| OTU_1139 | k__Bacteria;p__Bacteroidetes;c__Bacteroidia;o__Sphingobacteriales;f__unidentified_Sphingobacteriales;g__unidentified_Sphingobacteriales;s__Bacteroidetes_bacterium_UKL13-3 | 1 |
| OTU_1136 | k__Bacteria;p__Proteobacteria;c__Gammaproteobacteria;o__unidentified_Gammaproteobacteria;f__Nitrosomonadaceae;g__;s__ | 0.9 |
| OTU_1137 | k__Bacteria;p__Planctomycetes;c__Planctomycetacia;o__unidentified_Planctomycetacia;f__unidentified_Planctomycetacia;g__Rubripirellula;s__ | 1 |
| OTU_1134 | k__Bacteria;p__Bacteroidetes;c__Bacteroidia;o__Bacteroidales;f__Rikenellaceae;g__Alistipes;s__ | 1 |
| OTU_1135 | k__Bacteria;p__Proteobacteria;c__Alphaproteobacteria;o__Sphingomonadales;f__Sphingomonadaceae;g__Sphingomonas | 1 |
| OTU_1132 | k__Bacteria;p__;c__;o__;f__;g__;s__ | 0.8 |
| OTU_1133 | k__Bacteria;p__Bacteroidetes;c__Bacteroidia | 0.92 |
| OTU_1130 | k__Bacteria;p__Firmicutes;c__Negativicutes;o__Selenomonadales;f__Veillonellaceae;g__unidentified_Veillonellaceae;s__Selenomonas_artemidis | 0.98 |
| OTU_1131 | k__Bacteria;p__Proteobacteria;c__Gammaproteobacteria;o__Salinisphaerales;f__Solimonadaceae;g__Oceanococcus;s__Oceanococcus_atlanticus | 1 |
| OTU_951 | k__Archaea;p__Euryarchaeota;c__Thermoplasmata;o__unidentified_Thermoplasmata;f__unidentified_Thermoplasmata;g__unidentified_Thermoplasmata | 0.84 |
| OTU_1059 | k__Bacteria;p__Proteobacteria;c__Alphaproteobacteria;o__Rhodobacterales;f__Rhodobacteraceae;g__Tranquillimonas;s__ | 1 |
| OTU_1058 | k__Bacteria;p__Firmicutes;c__Clostridia;o__Clostridiales;f__unidentified_Clostridiales;g__unidentified_Clostridiales | 0.9 |
| OTU_1051 | k__Bacteria;p__Actinobacteria;c__unidentified_Actinobacteria;o__Corynebacteriales;f__Corynebacteriaceae;g__Corynebacterium;s__ | 0.96 |
| OTU_1050 | k__Bacteria;p__Firmicutes;c__Bacilli;o__Bacillales;f__Paenibacillaceae;g__Thermobacillus;s__ | 0.99 |
| OTU_1053 | k__Bacteria;p__Proteobacteria;c__Gammaproteobacteria;o__Cellvibrionales;f__Cellvibrionaceae | 1 |
| OTU_1052 | k__Bacteria;p__Acidobacteria;c__Acidobacteriia;o__;f__;g__;s__ | 1 |
| OTU_1055 | k__Bacteria;p__Firmicutes;c__Clostridia;o__Clostridiales;f__Ruminococcaceae;g__unidentified_Ruminococcaceae;s__[Clostridium]_papyrosolvens | 1 |
| OTU_1054 | k__Bacteria;p__Proteobacteria;c__Gammaproteobacteria;o__Xanthomonadales;f__Xanthomonadaceae;g__Luteimonas | 0.99 |
| OTU_1057 | k__Bacteria;p__Firmicutes;c__Clostridia;o__Clostridiales;f__Lachnospiraceae;g__unidentified_Lachnospiraceae | 0.94 |
| OTU_1056 | k__Bacteria;p__Actinobacteria;c__Acidimicrobiia;o__;f__;g__;s__ | 1 |
| OTU_178 | k__Bacteria;p__Actinobacteria;c__unidentified_Actinobacteria;o__Micrococcales;f__Micrococcaceae;g__Paenarthrobacter;s__Paenarthrobacter_nitroguajacolicus | 0.99 |
| OTU_2451 | k__Bacteria;p__Proteobacteria;c__Gammaproteobacteria;o__unidentified_Gammaproteobacteria;f__Burkholderiaceae | 1 |
| OTU_1529 | k__Bacteria;p__Firmicutes;c__Erysipelotrichia;o__Erysipelotrichales;f__Erysipelotrichaceae;g__Erysipelothrix;s__ | 0.91 |
| OTU_81 | k__Bacteria;p__Firmicutes;c__Clostridia;o__Clostridiales;f__Ruminococcaceae | 1 |
| OTU_1366 | k__Bacteria;p__Chloroflexi;c__Ktedonobacteria;o__Ktedonobacterales;f__Ktedonobacteraceae;g__;s__ | 0.91 |
| OTU_2351 | k__Bacteria;p__Proteobacteria;c__Gammaproteobacteria;o__Pasteurellales;f__Pasteurellaceae | 1 |
| OTU_1528 | k__Bacteria;p__Proteobacteria;c__Gammaproteobacteria;o__unidentified_Gammaproteobacteria;f__Rhodocyclaceae | 0.96 |
| OTU_2299 | k__Bacteria;p__Proteobacteria;c__Gammaproteobacteria;o__unidentified_Gammaproteobacteria;f__Neisseriaceae;g__Eikenella | 0.96 |
| OTU_2896 | k__Bacteria;p__Acidobacteria;c__unidentified_Acidobacteria;o__unidentified_Acidobacteria;f__unidentified_Acidobacteria;g__unidentified_Acidobacteria | 0.99 |
| OTU_1837 | k__Bacteria;p__Tenericutes;c__Mollicutes;o__Mycoplasmatales;f__Mycoplasmataceae;g__Mycoplasma | 1 |
| OTU_1836 | k__Bacteria | 1 |
| OTU_1835 | k__Bacteria;p__Bacteroidetes;c__Bacteroidia;o__Bacteroidales;f__Muribaculaceae;g__;s__ | 1 |
| OTU_1834 | k__Bacteria;p__Actinobacteria;c__Acidimicrobiia;o__;f__;g__;s__ | 1 |
| OTU_1833 | k__Bacteria;p__Proteobacteria;c__Gammaproteobacteria;o__unidentified_Gammaproteobacteria;f__unidentified_Gammaproteobacteria;g__unidentified_Gammaproteobacteria | 0.98 |
| OTU_1832 | k__Bacteria;p__Proteobacteria;c__Gammaproteobacteria;o__unidentified_Gammaproteobacteria;f__Burkholderiaceae;g__unidentified_Burkholderiaceae | 0.93 |
| OTU_1831 | k__Bacteria;p__Proteobacteria;c__Alphaproteobacteria;o__Rhodobacterales;f__Rhodobacteraceae | 1 |
| OTU_1830 | k__Bacteria | 1 |
| OTU_1839 | k__Bacteria;p__Bacteroidetes;c__Bacteroidia;o__Chitinophagales;f__Chitinophagaceae;g__unidentified_Chitinophagaceae;s__Sphingobacteriaceae_bacterium_BR5-29 | 0.86 |
| OTU_1838 | k__Bacteria;p__Cyanobacteria;c__unidentified_Cyanobacteria;o__unidentified_Cyanobacteria;f__unidentified_Cyanobacteria;g__unidentified_Cyanobacteria;s__Cyanobacteria/Melainabacteria_group_bacterium_S15B-MN24_CBMW_12 | 0.86 |
| OTU_2293 | k__Bacteria;p__Cyanobacteria;c__unidentified_Cyanobacteria;o__unidentified_Cyanobacteria;f__unidentified_Cyanobacteria;g__unidentified_Cyanobacteria;s__Picochlorum_sp_SENEW3 | 1 |
| OTU_2897 | k__Bacteria;p__Proteobacteria;c__Alphaproteobacteria;o__Rhizobiales;f__Xanthobacteraceae;g__Pseudolabrys;s__ | 0.87 |
| OTU_1800 | k__Bacteria;p__Proteobacteria;c__Gammaproteobacteria;o__Xanthomonadales | 1 |
| OTU_824 | k__Bacteria;p__Proteobacteria;c__Alphaproteobacteria;o__Rickettsiales;f__unidentified_Rickettsiales;g__unidentified_Rickettsiales;s__ | 0.97 |
| OTU_354 | k__Bacteria;p__Bacteroidetes;c__Bacteroidia;o__Chitinophagales;f__Chitinophagaceae;g__Ferruginibacter;s__ | 1 |
| OTU_1801 | k__Bacteria;p__Firmicutes;c__Bacilli;o__Bacillales;f__Paenibacillaceae;g__Aneurinibacillus;s__ | 1 |
| OTU_2238 | k__Bacteria | 1 |
| OTU_2239 | k__Bacteria;p__Bacteroidetes;c__Bacteroidia;o__Chitinophagales;f__Chitinophagaceae | 1 |
| OTU_355 | k__Bacteria;p__Proteobacteria;c__Gammaproteobacteria;o__unidentified_Gammaproteobacteria;f__Nitrosomonadaceae;g__unidentified_Nitrosomonadaceae;s__Betaproteobacteria_bacterium_GR16-43 | 0.86 |
| OTU_2234 | k__Bacteria;p__Firmicutes;c__Bacilli;o__Bacillales;f__Paenibacillaceae;g__Paenibacillus | 1 |
| OTU_2235 | k__Bacteria;p__Planctomycetes;c__Planctomycetacia;o__unidentified_Planctomycetacia;f__unidentified_Planctomycetacia;g__Blastopirellula;s__Pirellula_sp | 1 |
| OTU_2236 | k__Bacteria;p__Proteobacteria;c__Gammaproteobacteria;o__Xanthomonadales;f__Xanthomonadaceae;g__Stenotrophomonas | 1 |
| OTU_2237 | k__Bacteria;p__Proteobacteria;c__Gammaproteobacteria;o__Alteromonadales;f__Alteromonadaceae;g__Aestuariibacter | 0.92 |
| OTU_2230 | k__Bacteria;p__Verrucomicrobia;c__Verrucomicrobiae;o__Opitutales;f__Opitutaceae | 1 |
| OTU_2231 | k__Bacteria | 1 |
| OTU_2232 | k__Bacteria;p__Proteobacteria;c__Alphaproteobacteria;o__unidentified_Alphaproteobacteria;f__Acetobacteraceae | 1 |
| OTU_2233 | k__Bacteria;p__Planctomycetes;c__Planctomycetacia;o__unidentified_Planctomycetacia;f__Gemmataceae;g__Gemmata;s__ | 0.97 |
| OTU_1903 | k__Bacteria;p__Firmicutes | 0.84 |
| OTU_1902 | k__Bacteria;p__Firmicutes;c__Clostridia;o__Clostridiales;f__Ruminococcaceae;g__unidentified_Ruminococcaceae | 0.99 |
| OTU_1901 | k__Bacteria;p__Firmicutes;c__Clostridia;o__Clostridiales;f__Lachnospiraceae | 1 |
| OTU_1900 | k__Bacteria;p__Firmicutes;c__Clostridia;o__Clostridiales;f__Ruminococcaceae | 0.99 |
| OTU_1907 | k__Bacteria;p__Firmicutes;c__Clostridia;o__Clostridiales;f__Lachnospiraceae;g__Blautia | 0.91 |
| OTU_1906 | k__Bacteria;p__Firmicutes;c__Clostridia;o__Clostridiales | 0.89 |
| OTU_1905 | k__Bacteria;p__Gemmatimonadetes;c__Longimicrobia;o__Longimicrobiales;f__Longimicrobiaceae | 1 |
| OTU_1904 | k__Bacteria;p__Acidobacteria;c__;o__;f__;g__;s__ | 0.92 |
| OTU_1709 | k__Bacteria;p__Acidobacteria;c__;o__;f__;g__;s__ | 0.92 |
| OTU_1909 | k__Bacteria;p__Verrucomicrobia;c__Verrucomicrobiae | 1 |
| OTU_2295 | k__Bacteria;p__Bacteroidetes;c__Bacteroidia;o__Bacteroidales;f__Prevotellaceae;g__unidentified_Prevotellaceae;s__Prevotella_salivae | 1 |
| OTU_1708 | k__Bacteria;p__Proteobacteria;c__Gammaproteobacteria;o__Oceanospirillales;f__Litoricolaceae;g__Litoricola;s__ | 1 |
| OTU_2674 | k__Bacteria | 0.98 |
| OTU_352 | k__Bacteria;p__Firmicutes;c__Clostridia;o__Clostridiales;f__Lachnospiraceae | 1 |
| OTU_353 | k__Bacteria;p__Proteobacteria;c__Alphaproteobacteria;o__Sphingomonadales;f__Sphingomonadaceae;g__Sphingomonas | 1 |
| OTU_981 | k__Bacteria;p__Chlamydiae;c__unidentified_Chlamydiae;o__Chlamydiales | 1 |
| OTU_1699 | k__Bacteria;p__Proteobacteria;c__Gammaproteobacteria;o__Oceanospirillales;f__unidentified_Oceanospirillales | 0.97 |
| OTU_980 | k__Bacteria;p__Bacteroidetes;c__Bacteroidia;o__Flavobacteriales;f__Crocinitomicaceae | 0.99 |
| OTU_1478 | k__Bacteria;p__Cyanobacteria;c__unidentified_Cyanobacteria;o__unidentified_Cyanobacteria;f__unidentified_Cyanobacteria;g__unidentified_Cyanobacteria | 1 |
| OTU_828 | k__Bacteria | 0.97 |
| OTU_2671 | k__Bacteria;p__Acidobacteria;c__;o__;f__;g__;s__ | 0.85 |
| OTU_2582 | k__Bacteria;p__Proteobacteria;c__Gammaproteobacteria;o__unidentified_Gammaproteobacteria;f__unidentified_Gammaproteobacteria | 0.8 |
| OTU_2583 | k__Bacteria;p__Proteobacteria;c__Gammaproteobacteria;o__Pseudomonadales;f__Pseudomonadaceae;g__Pseudomonas | 0.96 |
| OTU_2580 | k__Bacteria;p__Proteobacteria;c__Alphaproteobacteria;o__unidentified_Alphaproteobacteria;f__unidentified_Alphaproteobacteria | 0.94 |
| OTU_2581 | k__Bacteria;p__Firmicutes;c__Clostridia;o__Clostridiales;f__Ruminococcaceae | 0.82 |
| OTU_2586 | k__Bacteria;p__Actinobacteria;c__;o__;f__;g__;s__ | 1 |
| OTU_2587 | k__Bacteria;p__Bacteroidetes;c__Bacteroidia;o__Flavobacteriales;f__Flavobacteriaceae;g__Dokdonia;s__ | 0.95 |
| OTU_2584 | k__Bacteria;p__Actinobacteria;c__unidentified_Actinobacteria;o__Micrococcales | 0.98 |
| OTU_2585 | k__Bacteria;p__Actinobacteria | 1 |
| OTU_358 | k__Bacteria;p__Bacteroidetes;c__Bacteroidia;o__Bacteroidales;f__Prevotellaceae;g__Prevotella;s__Prevotella_maculosa | 0.99 |
| OTU_2588 | k__Bacteria;p__Proteobacteria;c__Gammaproteobacteria;o__unidentified_Gammaproteobacteria;f__Gallionellaceae;g__Candidatus_Nitrotoga;s__ | 0.98 |
| OTU_2589 | k__Bacteria;p__Acidobacteria;c__unidentified_Acidobacteria;o__unidentified_Acidobacteria;f__unidentified_Acidobacteria | 0.91 |
| OTU_359 | k__Bacteria;p__Proteobacteria;c__Alphaproteobacteria;o__Rhizobiales;f__Beijerinckiaceae;g__Microvirga;s__ | 0.96 |
| OTU_2340 | k__Bacteria;p__Proteobacteria;c__Alphaproteobacteria;o__Micropepsales;f__Micropepsaceae;g__;s__ | 1 |
| OTU_2341 | k__Bacteria;p__Proteobacteria;c__Gammaproteobacteria;o__unidentified_Gammaproteobacteria;f__Woeseiaceae;g__Woeseia;s__ | 0.97 |
| OTU_2342 | k__Bacteria;p__Actinobacteria;c__Acidimicrobiia;o__;f__;g__;s__ | 0.95 |
| OTU_2343 | k__Bacteria;p__Proteobacteria;c__Gammaproteobacteria;o__Alteromonadales;f__Pseudoalteromonadaceae | 0.94 |
| OTU_2344 | k__Bacteria;p__Firmicutes;c__Erysipelotrichia;o__Erysipelotrichales;f__Erysipelotrichaceae;g__Ileibacterium;s__Ileibacterium_valens | 0.97 |
| OTU_2345 | k__Bacteria | 0.99 |
| OTU_2346 | k__Bacteria;p__Verrucomicrobia;c__Verrucomicrobiae;o__;f__;g__;s__ | 0.89 |
| OTU_2347 | k__Bacteria;p__Proteobacteria;c__Gammaproteobacteria;o__Aeromonadales;f__Succinivibrionaceae;g__Succinivibrio;s__ | 1 |
| OTU_2348 | k__Bacteria;p__Actinobacteria;c__Thermoleophilia | 0.88 |
| OTU_2349 | k__Bacteria;p__Proteobacteria;c__Alphaproteobacteria | 0.87 |
| OTU_2879 | k__Bacteria;p__Proteobacteria;c__Deltaproteobacteria;o__Myxococcales;f__Polyangiaceae | 1 |
| OTU_2568 | k__Bacteria;p__Bacteroidetes;c__Bacteroidia;o__Flavobacteriales | 0.89 |
| OTU_2569 | k__Bacteria;p__Actinobacteria;c__;o__;f__;g__;s__ | 1 |
| OTU_2560 | k__Bacteria;p__Planctomycetes;c__Planctomycetacia;o__unidentified_Planctomycetacia;f__Isosphaeraceae | 1 |
| OTU_2561 | k__Bacteria;p__Proteobacteria;c__Deltaproteobacteria;o__Myxococcales;f__Sandaracinaceae;g__;s__ | 1 |
| OTU_2562 | k__Bacteria;p__Bacteroidetes;c__Bacteroidia;o__Bacteroidales;f__Prevotellaceae;g__Prevotella | 0.99 |
| OTU_2563 | k__Bacteria;p__Planctomycetes;c__Planctomycetacia;o__;f__;g__;s__ | 0.95 |
| OTU_2564 | k__Bacteria;p__Bacteroidetes;c__Bacteroidia;o__Bacteroidales;f__Marinifilaceae;g__Butyricimonas | 1 |
| OTU_2565 | k__Bacteria;p__Firmicutes;c__Clostridia;o__Clostridiales;f__Peptococcaceae;g__;s__ | 0.84 |
| OTU_2566 | k__Bacteria | 1 |
| OTU_2567 | k__Bacteria;p__Proteobacteria;c__Deltaproteobacteria;o__Desulfobacterales;f__Desulfobulbaceae | 1 |
| OTU_1638 | k__Bacteria;p__Bacteroidetes;c__Bacteroidia;o__Flavobacteriales;f__Flavobacteriaceae | 0.88 |
| OTU_412 | k__Bacteria;p__Proteobacteria;c__Gammaproteobacteria;o__Pasteurellales;f__Pasteurellaceae | 1 |
| OTU_2950 | k__Bacteria;p__Bacteroidetes;c__Bacteroidia;o__Bacteroidales;f__Muribaculaceae;g__;s__ | 1 |
| OTU_957 | k__Bacteria;p__Acidobacteria;c__unidentified_Acidobacteria;o__unidentified_Acidobacteria;f__unidentified_Acidobacteria;g__unidentified_Acidobacteria | 0.99 |
| OTU_2696 | k__Bacteria;p__Proteobacteria;c__Gammaproteobacteria;o__unidentified_Gammaproteobacteria;f__Burkholderiaceae | 1 |
| OTU_2697 | k__Bacteria;p__Fusobacteria;c__Fusobacteriia;o__Fusobacteriales;f__Fusobacteriaceae;g__Fusobacterium | 0.99 |
| OTU_2694 | k__Bacteria;p__Proteobacteria;c__Gammaproteobacteria;o__Cellvibrionales;f__Porticoccaceae;g__Porticoccus;s__ | 1 |
| OTU_2695 | k__Bacteria;p__Proteobacteria;c__Gammaproteobacteria;o__unidentified_Gammaproteobacteria | 0.99 |
| OTU_2692 | k__Bacteria;p__Firmicutes;c__Clostridia;o__Clostridiales;f__Lachnospiraceae | 0.99 |
| OTU_2693 | k__Bacteria | 1 |
| OTU_2690 | k__Bacteria;p__Proteobacteria;c__Alphaproteobacteria;o__Caulobacterales;f__Caulobacteraceae | 0.94 |
| OTU_2691 | k__Bacteria;p__Proteobacteria;c__Alphaproteobacteria;o__Rhodobacterales;f__Rhodobacteraceae;g__Amylibacter;s__ | 1 |
| OTU_2168 | k__Bacteria;p__Firmicutes;c__Clostridia;o__Clostridiales;f__Ruminococcaceae | 0.87 |
| OTU_2169 | k__Bacteria;p__Bacteroidetes;c__Bacteroidia;o__Bacteroidales;f__Prolixibacteraceae | 1 |
| OTU_2698 | k__Bacteria;p__Planctomycetes;c__Phycisphaerae;o__Tepidisphaerales;f__;g__;s__ | 1 |
| OTU_2699 | k__Bacteria;p__Firmicutes;c__Clostridia;o__Clostridiales;f__unidentified_Clostridiales;g__unidentified_Clostridiales | 0.82 |
| OTU_1455 | k__Bacteria | 0.93 |
| OTU_1454 | k__Bacteria | 0.98 |
| OTU_1457 | k__Bacteria;p__Cyanobacteria;c__unidentified_Cyanobacteria;o__Synechococcales | 1 |
| OTU_1456 | k__Bacteria;p__Proteobacteria;c__Deltaproteobacteria | 0.96 |
| OTU_1451 | k__Bacteria;p__Actinobacteria;c__unidentified_Actinobacteria;o__Actinomycetales;f__Actinomycetaceae;g__Actinomyces | 1 |
| OTU_1450 | k__Bacteria;p__Proteobacteria;c__Gammaproteobacteria;o__Pseudomonadales;f__Moraxellaceae;g__Acinetobacter;s__Acinetobacter_celticus | 0.99 |
| OTU_1453 | k__Bacteria;p__Bacteroidetes;c__Bacteroidia;o__Bacteroidales;f__Muribaculaceae;g__;s__ | 1 |
| OTU_1452 | k__Bacteria;p__Actinobacteria;c__unidentified_Actinobacteria;o__Pseudonocardiales;f__Pseudonocardiaceae | 0.99 |
| OTU_772 | k__Bacteria;p__Firmicutes;c__Clostridia;o__Clostridiales;f__Lachnospiraceae | 1 |
| OTU_773 | k__Bacteria;p__Actinobacteria;c__Acidimicrobiia;o__Actinomarinales;f__;g__;s__ | 1 |
| OTU_770 | k__Bacteria;p__Bacteroidetes;c__Bacteroidia;o__Bacteroidales;f__Muribaculaceae;g__;s__ | 1 |
| OTU_771 | k__Bacteria;p__Firmicutes;c__Clostridia;o__Clostridiales;f__unidentified_Clostridiales;g__Sedimentibacter;s__ | 0.98 |
| OTU_1459 | k__Bacteria;p__Actinobacteria;c__Acidimicrobiia | 0.96 |
| OTU_1458 | k__Bacteria | 0.97 |
| OTU_774 | k__Bacteria;p__Proteobacteria;c__Alphaproteobacteria | 1 |
| OTU_775 | k__Bacteria;p__Planctomycetes;c__Planctomycetacia;o__unidentified_Planctomycetacia;f__Gemmataceae;g__Gemmata;s__ | 1 |
| OTU_578 | k__Bacteria;p__Proteobacteria;c__Alphaproteobacteria;o__unidentified_Alphaproteobacteria;f__unidentified_Alphaproteobacteria;g__unidentified_Alphaproteobacteria | 0.95 |
| OTU_579 | k__Bacteria;p__Actinobacteria;c__unidentified_Actinobacteria;o__Corynebacteriales;f__Mycobacteriaceae;g__Mycobacterium | 0.98 |
| OTU_574 | k__Bacteria;p__Firmicutes;c__Clostridia;o__Clostridiales;f__Lachnospiraceae | 0.98 |
| OTU_575 | k__Bacteria;p__Firmicutes;c__Clostridia;o__Clostridiales;f__Lachnospiraceae | 1 |
| OTU_576 | k__Bacteria;p__Firmicutes;c__Clostridia;o__Clostridiales;f__Lachnospiraceae;g__unidentified_Lachnospiraceae;s__[Eubacterium]_hallii | 1 |
| OTU_577 | k__Bacteria;p__Actinobacteria;c__unidentified_Actinobacteria;o__Micromonosporales;f__Micromonosporaceae;g__Luedemannella;s__ | 0.89 |
| OTU_570 | k__Bacteria;p__Firmicutes;c__Bacilli;o__Lactobacillales;f__Leuconostocaceae;g__Weissella | 1 |
| OTU_571 | k__Bacteria;p__Bacteroidetes;c__Bacteroidia;o__Chitinophagales;f__Chitinophagaceae;g__Parafilimonas;s__ | 1 |
| OTU_572 | k__Bacteria;p__Proteobacteria;c__Gammaproteobacteria;o__Xanthomonadales;f__Xanthomonadaceae;g__Pseudoxanthomonas | 1 |
| OTU_573 | k__Bacteria;p__Proteobacteria;c__Alphaproteobacteria;o__Caulobacterales;f__Hyphomonadaceae;g__;s__ | 1 |
| OTU_2952 | k__Bacteria;p__Bacteroidetes;c__Bacteroidia;o__Bacteroidales;f__Barnesiellaceae;g__Barnesiella | 0.95 |
| OTU_170 | k__Bacteria;p__Bacteroidetes;c__Bacteroidia;o__Flavobacteriales;f__Crocinitomicaceae | 0.98 |
| OTU_171 | k__Bacteria;p__Proteobacteria;c__Alphaproteobacteria;o__Rhodobacterales;f__Rhodobacteraceae | 1 |
| OTU_172 | k__Bacteria;p__Actinobacteria;c__unidentified_Actinobacteria;o__Micrococcales;f__Dermacoccaceae;g__Kytococcus | 0.98 |
| OTU_2769 | k__Bacteria | 1 |
| OTU_87 | k__Bacteria;p__Bacteroidetes;c__Bacteroidia;o__Bacteroidales;f__Bacteroidaceae;g__Bacteroides;s__Bacteroides_uniformis | 1 |
| OTU_86 | k__Bacteria;p__Proteobacteria;c__Gammaproteobacteria;o__Xanthomonadales;f__Xanthomonadaceae | 1 |
| OTU_85 | k__Bacteria;p__Bacteroidetes;c__Bacteroidia;o__Flavobacteriales;f__unidentified_Flavobacteriales;g__Chryseobacterium | 1 |
| OTU_177 | k__Bacteria;p__Actinobacteria;c__unidentified_Actinobacteria;o__Frankiales;f__Nakamurellaceae;g__Nakamurella | 0.99 |
| OTU_2762 | k__Bacteria | 0.94 |
| OTU_2763 | k__Bacteria;p__Proteobacteria;c__Alphaproteobacteria | 1 |
| OTU_2760 | k__Bacteria;p__Bacteroidetes;c__Bacteroidia;o__Bacteroidales;f__Rikenellaceae;g__Alistipes;s__Tidjanibacter_massiliensis | 1 |
| OTU_2761 | k__Bacteria;p__Gemmatimonadetes;c__unidentified_Gemmatimonadetes;o__Gemmatimonadales;f__Gemmatimonadaceae;g__Gemmatimonas;s__ | 0.96 |
| OTU_2766 | k__Bacteria;p__Firmicutes;c__Clostridia;o__Clostridiales;f__Peptostreptococcaceae;g__Clostridioides | 0.91 |
| OTU_2767 | k__Bacteria;p__Firmicutes;c__Clostridia;o__Clostridiales;f__Ruminococcaceae;g__Intestinimonas;s__ | 1 |
| OTU_2764 | k__Bacteria;p__Firmicutes;c__Clostridia;o__Clostridiales;f__unidentified_Clostridiales | 0.99 |
| OTU_2765 | k__Bacteria;p__Firmicutes;c__Erysipelotrichia;o__Erysipelotrichales;f__Erysipelotrichaceae | 1 |
| OTU_2832 | k__Bacteria;p__Bacteroidetes;c__Bacteroidia;o__Bacteroidales;f__Muribaculaceae;g__unidentified_Muribaculaceae;s__Bacteroidales_bacterium_H4 | 1 |
| OTU_2833 | k__Bacteria;p__Acidobacteria;c__;o__;f__;g__;s__ | 0.89 |
| OTU_2830 | k__Bacteria | 1 |
| OTU_2831 | k__Bacteria;p__Bacteroidetes;c__Bacteroidia;o__Chitinophagales;f__Chitinophagaceae | 1 |
| OTU_2836 | k__Bacteria;p__Proteobacteria;c__Gammaproteobacteria;o__unidentified_Gammaproteobacteria;f__Burkholderiaceae;g__Limnobacter | 0.8 |
| OTU_2837 | k__Bacteria;p__Gemmatimonadetes;c__unidentified_Gemmatimonadetes;o__Gemmatimonadales;f__Gemmatimonadaceae;g__Gemmatimonas;s__Gemmatimonadetes_bacterium_Ellin7146 | 0.93 |
| OTU_2834 | k__Bacteria;p__Actinobacteria;c__unidentified_Actinobacteria;o__Propionibacteriales;f__Nocardioidaceae;g__Nocardioides | 0.96 |
| OTU_2835 | k__Bacteria;p__Proteobacteria;c__Deltaproteobacteria;o__Desulfovibrionales;f__Desulfovibrionaceae;g__;s__ | 0.98 |
| OTU_2838 | k__Bacteria;p__Actinobacteria;c__unidentified_Actinobacteria;o__Frankiales;f__Sporichthyaceae;g__;s__ | 0.98 |
| OTU_2839 | k__Bacteria;p__Proteobacteria;c__Gammaproteobacteria;o__Pseudomonadales;f__Moraxellaceae;g__Acinetobacter | 1 |
| OTU_318 | k__Bacteria;p__Proteobacteria;c__Alphaproteobacteria;o__unidentified_Alphaproteobacteria;f__unidentified_Alphaproteobacteria;g__unidentified_Alphaproteobacteria | 0.85 |
| OTU_319 | k__Bacteria;p__Bacteroidetes;c__Bacteroidia;o__Bacteroidales;f__Bacteroidaceae;g__Bacteroides | 1 |
| OTU_450 | k__Bacteria;p__Proteobacteria;c__Gammaproteobacteria;o__unidentified_Gammaproteobacteria;f__unidentified_Gammaproteobacteria;g__unidentified_Gammaproteobacteria;s__bacterium_endosymbiont_of_Onthophagus_Taurus | 0.87 |
| OTU_2990 | k__Bacteria;p__Proteobacteria;c__Gammaproteobacteria;o__unidentified_Gammaproteobacteria;f__Burkholderiaceae;g__Janthinobacterium | 0.99 |
| OTU_310 | k__Bacteria;p__Proteobacteria;c__Alphaproteobacteria;o__unidentified_Alphaproteobacteria;f__Paracaedibacteraceae | 0.94 |
| OTU_311 | k__Bacteria;p__Proteobacteria;c__Gammaproteobacteria;o__Oceanospirillales;f__Halomonadaceae;g__Cobetia;s__Cobetia_marina | 1 |
| OTU_312 | k__Bacteria;p__Chloroflexi;c__Ktedonobacteria;o__Ktedonobacterales;f__;g__;s__ | 0.93 |
| OTU_313 | k__Bacteria;p__Firmicutes;c__Clostridia;o__Clostridiales;f__Ruminococcaceae | 0.98 |
| OTU_314 | k__Bacteria;p__Proteobacteria;c__Alphaproteobacteria;o__unidentified_Alphaproteobacteria;f__Geminicoccaceae;g__Candidatus_Alysiosphaera;s__ | 0.99 |
| OTU_315 | k__Bacteria;p__Firmicutes;c__Clostridia;o__Clostridiales;f__Lachnospiraceae | 1 |
| OTU_316 | k__Bacteria;p__Firmicutes;c__Clostridia;o__Clostridiales;f__unidentified_Clostridiales;g__Fonticella;s__ | 0.99 |
| OTU_317 | k__Bacteria;p__Proteobacteria;c__Alphaproteobacteria;o__;f__;g__;s__ | 0.86 |
| OTU_1587 | k__Bacteria;p__Rokubacteria;c__;o__;f__;g__;s__ | 1 |
| OTU_1586 | k__Bacteria;p__Proteobacteria;c__Deltaproteobacteria;o__Myxococcales | 1 |
| OTU_1585 | k__Bacteria;p__Verrucomicrobia;c__Verrucomicrobiae;o__Verrucomicrobiales;f__Verrucomicrobiaceae;g__;s__ | 1 |
| OTU_1584 | k__Bacteria;p__Proteobacteria;c__Deltaproteobacteria;o__Myxococcales;f__Sandaracinaceae;g__;s__ | 1 |
| OTU_1583 | k__Bacteria;p__Firmicutes;c__Clostridia;o__Clostridiales;f__Lachnospiraceae;g__unidentified_Lachnospiraceae;s__Clostridium_sp_ASF356 | 0.99 |
| OTU_1582 | k__Bacteria;p__Actinobacteria;c__Acidimicrobiia | 1 |
| OTU_1581 | k__Bacteria;p__Actinobacteria;c__unidentified_Actinobacteria | 1 |
| OTU_1580 | k__Bacteria;p__Bacteroidetes;c__Bacteroidia;o__Bacteroidales;f__Prolixibacteraceae | 0.97 |
| OTU_2898 | k__Bacteria;p__Actinobacteria;c__Acidimicrobiia;o__;f__;g__;s__ | 0.99 |
| OTU_1589 | k__Bacteria;p__Proteobacteria;c__Gammaproteobacteria;o__unidentified_Gammaproteobacteria;f__unidentified_Gammaproteobacteria;g__Marinicella;s__ | 0.91 |
| OTU_1588 | k__Bacteria;p__Actinobacteria;c__Acidimicrobiia | 1 |
| OTU_457 | k__Bacteria;p__Firmicutes;c__Bacilli;o__Lactobacillales;f__Lactobacillaceae;g__Lactobacillus;s__Lactobacillus_iners | 0.93 |
| OTU_2993 | k__Bacteria;p__Chlamydiae;c__unidentified_Chlamydiae;o__Chlamydiales;f__Parachlamydiaceae;g__Neochlamydia | 0.84 |
| OTU_2726 | k__Bacteria;p__Gemmatimonadetes;c__unidentified_Gemmatimonadetes;o__Gemmatimonadales;f__Gemmatimonadaceae | 1 |
| OTU_348 | k__Bacteria;p__Proteobacteria;c__Gammaproteobacteria;o__Alteromonadales;f__Pseudoalteromonadaceae;g__Psychrosphaera;s__ | 0.87 |
| OTU_2825 | k__Bacteria;p__Proteobacteria;c__Gammaproteobacteria | 1 |
| OTU_2899 | k__Bacteria;p__Cyanobacteria;c__unidentified_Cyanobacteria;o__unidentified_Cyanobacteria;f__unidentified_Cyanobacteria;g__unidentified_Cyanobacteria | 1 |
| OTU_2906 | k__Bacteria;p__Verrucomicrobia;c__Verrucomicrobiae;o__Chthoniobacterales;f__Chthoniobacteraceae | 0.98 |
| OTU_2907 | k__Bacteria;p__Planctomycetes;c__;o__;f__;g__;s__ | 0.98 |
| OTU_2904 | k__Bacteria;p__Proteobacteria;c__Alphaproteobacteria | 0.84 |
| OTU_2905 | k__Bacteria;p__Proteobacteria;c__Alphaproteobacteria;o__unidentified_Alphaproteobacteria;f__unidentified_Alphaproteobacteria | 0.8 |
| OTU_1639 | k__Bacteria;p__Firmicutes;c__Clostridia;o__Clostridiales;f__unidentified_Clostridiales;g__Anaerococcus;s__Anaerococcus_provenciensis | 0.93 |
| OTU_2903 | k__Bacteria;p__Proteobacteria;c__Gammaproteobacteria;o__unidentified_Gammaproteobacteria | 0.97 |
| OTU_402 | k__Bacteria;p__Firmicutes;c__Clostridia;o__Clostridiales;f__Lachnospiraceae;g__Roseburia | 0.83 |
| OTU_2901 | k__Bacteria;p__Proteobacteria;c__Alphaproteobacteria;o__Rhodobacterales;f__Rhodobacteraceae | 0.9 |
| OTU_1635 | k__Bacteria;p__Firmicutes;c__Clostridia;o__Clostridiales;f__Christensenellaceae;g__;s__ | 0.94 |
| OTU_1634 | k__Bacteria;p__Bacteroidetes;c__Bacteroidia;o__Cytophagales;f__Cyclobacteriaceae;g__Algoriphagus;s__Algoriphagus_ornithinivorans | 0.99 |
| OTU_1637 | k__Bacteria;p__Firmicutes;c__Bacilli;o__Bacillales;f__Bacillaceae | 0.9 |
| OTU_1636 | k__Bacteria;p__Firmicutes;c__Clostridia;o__Clostridiales;f__Ruminococcaceae;g__unidentified_Ruminococcaceae;s__Clostridiales_bacterium_CIEAF_026 | 0.81 |
| OTU_1631 | k__Bacteria;p__Cyanobacteria;c__unidentified_Cyanobacteria;o__unidentified_Cyanobacteria;f__unidentified_Cyanobacteria;g__unidentified_Cyanobacteria | 1 |
| OTU_1630 | k__Bacteria;p__Firmicutes;c__Clostridia;o__Clostridiales;f__Ruminococcaceae | 0.88 |
| OTU_2908 | k__Bacteria;p__Verrucomicrobia;c__Verrucomicrobiae;o__Chthoniobacterales;f__Chthoniobacteraceae;g__;s__ | 1 |
| OTU_2909 | k__Bacteria;p__Proteobacteria;c__Deltaproteobacteria;o__Desulfobacterales;f__Desulfobulbaceae;g__Desulfobulbus;s__ | 0.87 |
| OTU_794 | k__Bacteria;p__Proteobacteria;c__Deltaproteobacteria;o__Myxococcales;f__Archangiaceae;g__Anaeromyxobacter | 0.99 |
| OTU_795 | k__Bacteria;p__Actinobacteria;c__Acidimicrobiia | 1 |
| OTU_796 | k__Bacteria;p__Bacteroidetes;c__Bacteroidia;o__Bacteroidales;f__Rikenellaceae | 0.98 |
| OTU_797 | k__Bacteria;p__Proteobacteria;c__Alphaproteobacteria;o__unidentified_Alphaproteobacteria;f__Acetobacteraceae;g__Rhodovastum;s__ | 0.85 |
| OTU_2824 | k__Bacteria;p__Actinobacteria;c__unidentified_Actinobacteria;o__Catenulisporales;f__Catenulisporaceae;g__Catenulispora;s__Catenulispora_sp | 0.98 |
| OTU_791 | k__Bacteria;p__Actinobacteria;c__Acidimicrobiia;o__;f__;g__;s__ | 1 |
| OTU_792 | k__Bacteria;p__Bacteroidetes;c__Bacteroidia;o__Chitinophagales;f__Chitinophagaceae;g__Parasegetibacter;s__ | 0.81 |
| OTU_793 | k__Bacteria;p__Bacteroidetes;c__Bacteroidia;o__Chitinophagales;f__Chitinophagaceae | 1 |
| OTU_798 | k__Bacteria | 1 |
| OTU_799 | k__Bacteria;p__Bacteroidetes;c__Bacteroidia;o__Bacteroidales;f__Porphyromonadaceae;g__Porphyromonas;s__ | 0.98 |
| OTU_2165 | k__Bacteria;p__Acidobacteria;c__unidentified_Acidobacteria;o__unidentified_Acidobacteria;f__Pyrinomonadaceae;g__;s__ | 0.99 |
| OTU_2959 | k__Bacteria;p__Proteobacteria;c__Gammaproteobacteria | 1 |
| OTU_1965 | k__Bacteria;p__Firmicutes;c__Clostridia;o__Clostridiales;f__Lachnospiraceae | 1 |
| OTU_2827 | k__Bacteria;p__Melainabacteria;c__unidentified_Melainabacteria;o__Obscuribacterales;f__;g__;s__ | 0.99 |
| OTU_1964 | k__Bacteria;p__Proteobacteria;c__Deltaproteobacteria;o__;f__;g__;s__ | 0.81 |
| OTU_2166 | k__Bacteria;p__Actinobacteria;c__unidentified_Actinobacteria;o__Frankiales;f__Geodermatophilaceae;g__Modestobacter;s__ | 0.96 |
| OTU_1966 | k__Bacteria;p__Proteobacteria;c__Gammaproteobacteria;o__Xanthomonadales;f__Rhodanobacteraceae;g__Dokdonella | 1 |
| OTU_2958 | k__Bacteria | 0.98 |
| OTU_1961 | k__Bacteria;p__Actinobacteria;c__unidentified_Actinobacteria;o__Frankiales;f__Sporichthyaceae | 1 |
| OTU_1960 | k__Bacteria | 1 |
| OTU_2826 | k__Bacteria | 1 |
| OTU_1120 | k__Bacteria;p__Proteobacteria;c__Alphaproteobacteria | 1 |
| OTU_1123 | k__Bacteria;p__Proteobacteria;c__Gammaproteobacteria;o__unidentified_Gammaproteobacteria;f__Methylophilaceae | 0.96 |
| OTU_1122 | k__Bacteria;p__Actinobacteria;c__Rubrobacteria;o__Rubrobacterales;f__unidentified_Rubrobacterales;g__Rubrobacter;s__ | 1 |
| OTU_1125 | k__Bacteria;p__Proteobacteria;c__Deltaproteobacteria;o__Myxococcales;f__Haliangiaceae;g__Haliangium;s__ | 1 |
| OTU_1963 | k__Bacteria;p__Proteobacteria;c__Deltaproteobacteria;o__Myxococcales;f__Polyangiaceae;g__Sorangium;s__ | 0.92 |
| OTU_1127 | k__Bacteria;p__Actinobacteria;c__Thermoleophilia;o__Gaiellales;f__;g__;s__ | 0.82 |
| OTU_1126 | k__Bacteria;p__Acidobacteria;c__Acidobacteriia;o__unidentified_Acidobacteriia;f__unidentified_Acidobacteriia;g__unidentified_Acidobacteriia;s__bacterium_Ellin7505 | 0.94 |
| OTU_1129 | k__Bacteria;p__Bacteroidetes;c__Bacteroidia;o__Flavobacteriales;f__Flavobacteriaceae;g__;s__ | 1 |
| OTU_1128 | k__Bacteria;p__unidentified_Bacteria;c__unidentified_Bacteria;o__unidentified_Bacteria;f__unidentified_Bacteria;g__unidentified_Bacteria;s__soil_bacterium_WF55 | 0.95 |
| OTU_1962 | k__Bacteria;p__Proteobacteria;c__Deltaproteobacteria;o__Desulfovibrionales;f__Desulfovibrionaceae;g__Mailhella;s__ | 1 |
| OTU_2997 | k__Bacteria;p__Firmicutes;c__Clostridia;o__Clostridiales;f__Ruminococcaceae | 0.81 |
| OTU_777 | k__Bacteria;p__Firmicutes;c__Clostridia;o__Clostridiales;f__Lachnospiraceae;g__Tyzzerella;s__ | 1 |
| OTU_2821 | k__Bacteria;p__Firmicutes;c__Clostridia;o__Clostridiales;f__Christensenellaceae;g__;s__ | 0.96 |
| OTU_2708 | k__Bacteria;p__Firmicutes;c__Erysipelotrichia;o__Erysipelotrichales;f__Erysipelotrichaceae;g__Erysipelothrix;s__Erysipelothrix_rhusiopathiae | 1 |
| OTU_2709 | k__Bacteria;p__Bacteroidetes;c__Bacteroidia;o__Flavobacteriales;f__Flavobacteriaceae;g__;s__ | 1 |
| OTU_2727 | k__Bacteria;p__Acidobacteria | 1 |
| OTU_907 | k__Bacteria;p__Firmicutes;c__Clostridia;o__Clostridiales;f__Lachnospiraceae | 1 |
| OTU_132 | k__Bacteria;p__Bacteroidetes;c__Bacteroidia;o__Bacteroidales;f__Prevotellaceae;g__Alloprevotella;s__ | 1 |
| OTU_1028 | k__Bacteria;p__Planctomycetes;c__Planctomycetacia | 1 |
| OTU_1029 | k__Bacteria;p__Fusobacteria;c__Fusobacteriia;o__Fusobacteriales;f__Leptotrichiaceae;g__Leptotrichia;s__Leptotrichia_sp_oral_clone_FP036 | 1 |
| OTU_955 | k__Bacteria;p__Firmicutes;c__Clostridia;o__Clostridiales;f__Lachnospiraceae;g__Epulopiscium;s__ | 0.94 |
| OTU_1025 | k__Bacteria;p__Acidobacteria;c__;o__;f__;g__;s__ | 0.96 |
| OTU_1026 | k__Bacteria;p__Proteobacteria;c__Alphaproteobacteria;o__Rhizobiales;f__Hyphomicrobiaceae;g__Pedomicrobium;s__ | 0.95 |
| OTU_1027 | k__Bacteria;p__Verrucomicrobia;c__Verrucomicrobiae;o__Chthoniobacterales;f__Chthoniobacteraceae;g__Chthoniobacter;s__ | 0.98 |
| OTU_2820 | k__Bacteria;p__Proteobacteria;c__Alphaproteobacteria;o__Rickettsiales | 0.92 |
| OTU_1021 | k__Bacteria;p__Chloroflexi | 0.83 |
| OTU_1022 | k__Bacteria;p__Proteobacteria;c__Alphaproteobacteria;o__Rhizobiales;f__unidentified_Rhizobiales;g__Methyloceanibacter;s__ | 1 |
| OTU_1023 | k__Bacteria;p__Proteobacteria;c__Gammaproteobacteria;o__unidentified_Gammaproteobacteria;f__unidentified_Gammaproteobacteria;g__Acidibacter;s__ | 0.92 |
| OTU_1509 | k__Bacteria;p__Bacteroidetes;c__Bacteroidia | 1 |
| OTU_2161 | k__Bacteria;p__Firmicutes;c__Erysipelotrichia;o__Erysipelotrichales;f__Erysipelotrichaceae;g__Solobacterium;s__Solobacterium_moorei | 1 |
| OTU_2999 | k__Bacteria;p__Cyanobacteria;c__unidentified_Cyanobacteria;o__Nostocales;f__Nostocaceae | 0.8 |
| OTU_1508 | k__Bacteria;p__Acidobacteria;c__unidentified_Acidobacteria;o__unidentified_Acidobacteria;f__unidentified_Acidobacteria;g__unidentified_Acidobacteria;s__uncultivated_soil_bacterium_clone_S111 | 0.99 |
| OTU_906 | k__Bacteria;p__Actinobacteria;c__unidentified_Actinobacteria;o__Micrococcales;f__Intrasporangiaceae;g__Ornithinicoccus;s__ | 0.8 |
| OTU_2700 | k__Bacteria;p__Firmicutes;c__Erysipelotrichia;o__Erysipelotrichales;f__Erysipelotrichaceae;g__Erysipelatoclostridium | 0.89 |
| OTU_2701 | k__Bacteria;p__Bacteroidetes;c__Bacteroidia;o__Bacteroidales;f__Bacteroidaceae;g__Bacteroides;s__Bacteroides_nordii | 0.88 |
| OTU_2823 | k__Bacteria;p__Firmicutes;c__Bacilli;o__Lactobacillales;f__Leuconostocaceae;g__Weissella;s__Weissella_viridescens | 1 |
| OTU_2702 | k__Bacteria;p__Acidobacteria | 1 |
| OTU_1778 | k__Bacteria;p__Bacteroidetes;c__Bacteroidia;o__Bacteroidales;f__;g__;s__ | 0.87 |
| OTU_1538 | k__Bacteria;p__Chloroflexi;c__Anaerolineae;o__Anaerolineales;f__Anaerolineaceae;g__Leptolinea;s__Leptolinea_tardivitalis | 1 |
| OTU_2703 | k__Bacteria;p__Proteobacteria;c__Deltaproteobacteria | 0.97 |
| OTU_2998 | k__Bacteria;p__Proteobacteria;c__Deltaproteobacteria;o__Desulfobacterales;f__Desulfobacteraceae | 1 |
| OTU_2704 | k__Bacteria;p__Proteobacteria;c__Gammaproteobacteria;o__unidentified_Gammaproteobacteria;f__unidentified_Gammaproteobacteria;g__Acidibacter;s__ | 1 |
| OTU_624 | k__Bacteria | 1 |
| OTU_2705 | k__Bacteria;p__Chloroflexi;c__Ktedonobacteria;o__Ktedonobacterales;f__Ktedonobacteraceae;g__;s__ | 0.9 |
| OTU_2706 | k__Bacteria;p__Firmicutes;c__Clostridia;o__Clostridiales;f__Peptococcaceae;g__Dehalobacter | 1 |
| OTU_2822 | k__Bacteria;p__Firmicutes;c__Clostridia;o__Clostridiales | 0.85 |
| OTU_2707 | k__Bacteria;p__Acidobacteria | 1 |
| OTU_1539 | k__Bacteria;p__Bacteroidetes;c__Bacteroidia;o__Flavobacteriales;f__unidentified_Flavobacteriales;g__Ornithobacterium;s__ | 1 |
| OTU_1331 | k__Bacteria;p__Firmicutes;c__Clostridia;o__Clostridiales;f__Ruminococcaceae;g__Oscillibacter;s__ | 1 |
| OTU_1332 | k__Bacteria;p__Bacteroidetes;c__Bacteroidia;o__Chitinophagales;f__Chitinophagaceae | 1 |
| OTU_1333 | k__Bacteria;p__Acidobacteria;c__Acidobacteriia;o__Acidobacteriales;f__;g__;s__ | 1 |
| OTU_1334 | k__Bacteria;p__Proteobacteria;c__Gammaproteobacteria;o__unidentified_Gammaproteobacteria | 0.98 |
| OTU_1677 | k__Bacteria;p__Cyanobacteria;c__unidentified_Cyanobacteria;o__Nostocales;f__Nostocaceae;g__unidentified_Nostocaceae;s__Nostoc_commune | 0.98 |
| OTU_1336 | k__Bacteria;p__Proteobacteria;c__Gammaproteobacteria;o__Xanthomonadales;f__Xanthomonadaceae;g__Pseudoxanthomonas;s__Pseudoxanthomonas_indica | 0.94 |
| OTU_1337 | k__Bacteria;p__Bacteroidetes;c__Bacteroidia;o__Bacteroidales;f__Prevotellaceae;g__unidentified_Prevotellaceae;s__Prevotella_sp_DJF_CP65 | 0.88 |
| OTU_1338 | k__Bacteria;p__Proteobacteria;c__Gammaproteobacteria;o__unidentified_Gammaproteobacteria | 1 |
| OTU_1339 | k__Bacteria;p__Proteobacteria;c__Alphaproteobacteria;o__Rhodobacterales;f__Rhodobacteraceae | 1 |
| OTU_1124 | k__Bacteria;p__Firmicutes;c__Bacilli;o__Bacillales;f__Bacillaceae;g__Geobacillus;s__Geobacillus_stearothermophilus | 1 |
| OTU_1679 | k__Bacteria;p__Acidobacteria;c__Holophagae | 1 |
| OTU_1678 | k__Bacteria;p__Chloroflexi;c__Anaerolineae;o__Caldilineales;f__Caldilineaceae | 0.99 |
| OTU_451 | k__Bacteria;p__Chloroflexi;c__Dehalococcoidia | 0.99 |
| OTU_1773 | k__Bacteria;p__Cyanobacteria;c__unidentified_Cyanobacteria;o__unidentified_Cyanobacteria;f__unidentified_Cyanobacteria;g__unidentified_Cyanobacteria | 1 |
| OTU_2460 | k__Bacteria | 1 |
| OTU_1776 | k__Bacteria;p__Proteobacteria;c__Gammaproteobacteria;o__Xanthomonadales | 0.99 |
| OTU_2933 | k__Bacteria;p__Verrucomicrobia;c__Verrucomicrobiae;o__Verrucomicrobiales;f__Rubritaleaceae;g__Luteolibacter;s__ | 0.85 |
| OTU_1777 | k__Bacteria;p__Firmicutes;c__Clostridia;o__Clostridiales | 0.87 |
| OTU_2229 | k__Bacteria;p__Bacteroidetes;c__Bacteroidia;o__Cytophagales;f__Spirosomaceae;g__Runella;s__ | 0.99 |
| OTU_2228 | k__Bacteria;p__Deinococcus-Thermus;c__Deinococci;o__Thermales;f__Thermaceae;g__Meiothermus | 1 |
| OTU_133 | k__Bacteria;p__Proteobacteria;c__Alphaproteobacteria;o__Caulobacterales;f__Caulobacteraceae;g__Brevundimonas;s__Brevundimonas_diminuta | 1 |
| OTU_2226 | k__Bacteria;p__Proteobacteria;c__Deltaproteobacteria;o__Myxococcales | 0.99 |
| OTU_2225 | k__Bacteria;p__Proteobacteria;c__Alphaproteobacteria;o__unidentified_Alphaproteobacteria;f__Acetobacteraceae;g__Roseomonas | 0.97 |
| OTU_2224 | k__Bacteria;p__Firmicutes;c__Clostridia;o__Clostridiales;f__Ruminococcaceae;g__unidentified_Ruminococcaceae;s__iron-reducing_bacterium_enrichment_culture_clone_FEA_2_C3 | 0.91 |
| OTU_2223 | k__Bacteria;p__Proteobacteria;c__Deltaproteobacteria;o__unidentified_Deltaproteobacteria;f__unidentified_Deltaproteobacteria;g__unidentified_Deltaproteobacteria;s__SAR324_cluster_bacterium_JCVI-SC_AAA005 | 1 |
| OTU_2222 | k__Bacteria;p__unidentified_Bacteria;c__unidentified_Bacteria;o__Campylobacterales;f__Campylobacteraceae;g__Campylobacter | 1 |
| OTU_2221 | k__Bacteria;p__Bacteroidetes;c__Bacteroidia;o__Flavobacteriales;f__Flavobacteriaceae;g__Tenacibaculum | 0.94 |
| OTU_2220 | k__Bacteria;p__Proteobacteria;c__Gammaproteobacteria;o__unidentified_Gammaproteobacteria;f__Nitrosomonadaceae;g__;s__ | 0.84 |
| OTU_1936 | k__Bacteria;p__Firmicutes;c__Clostridia;o__Clostridiales;f__Ruminococcaceae | 0.93 |
| OTU_1937 | k__Bacteria;p__Bacteroidetes;c__Bacteroidia;o__Bacteroidales;f__Marinifilaceae;g__Odoribacter;s__ | 1 |
| OTU_1934 | k__Bacteria;p__Actinobacteria;c__Acidimicrobiia;o__;f__;g__;s__ | 0.98 |
| OTU_1935 | k__Bacteria | 0.98 |
| OTU_1932 | k__Bacteria;p__Gracilibacteria;c__unidentified_Gracilibacteria;o__unidentified_Gracilibacteria;f__unidentified_Gracilibacteria;g__unidentified_Gracilibacteria;s__bacterium_RFB_D08 | 0.97 |
| OTU_1933 | k__Bacteria;p__Proteobacteria;c__Gammaproteobacteria;o__Legionellales;f__Legionellaceae;g__Legionella | 1 |
| OTU_1930 | k__Archaea;p__Euryarchaeota;c__Methanomicrobia;o__Methanosarcinales;f__Methanosaetaceae;g__Methanosaeta;s__ | 1 |
| OTU_1931 | k__Bacteria;p__Bacteroidetes;c__Bacteroidia;o__Bacteroidales;f__Prolixibacteraceae;g__;s__ | 0.86 |
| OTU_1938 | k__Bacteria | 0.96 |
| OTU_1939 | k__Bacteria;p__Firmicutes;c__Clostridia;o__Clostridiales;f__Ruminococcaceae;g__unidentified_Ruminococcaceae | 0.8 |
| OTU_1688 | k__Bacteria;p__Actinobacteria;c__;o__;f__;g__;s__ | 0.89 |
| OTU_238 | k__Bacteria;p__Proteobacteria;c__Alphaproteobacteria;o__Rhizobiales;f__unidentified_Rhizobiales;g__Devosia | 0.98 |
| OTU_640 | k__Bacteria | 1 |
| OTU_188 | k__Bacteria;p__Proteobacteria;c__Gammaproteobacteria;o__unidentified_Gammaproteobacteria;f__unidentified_Gammaproteobacteria;g__unidentified_Gammaproteobacteria | 1 |
| OTU_2595 | k__Bacteria | 1 |
| OTU_2594 | k__Bacteria;p__Planctomycetes;c__Planctomycetacia;o__unidentified_Planctomycetacia;f__Isosphaeraceae;g__Singulisphaera;s__ | 0.98 |
| OTU_2597 | k__Bacteria;p__Planctomycetes;c__Planctomycetacia;o__unidentified_Planctomycetacia;f__Isosphaeraceae | 1 |
| OTU_2596 | k__Bacteria;p__Bacteroidetes;c__Bacteroidia;o__Bacteroidales;f__Prevotellaceae;g__Alloprevotella;s__ | 0.94 |
| OTU_2591 | k__Bacteria;p__Bacteroidetes;c__Bacteroidia | 0.91 |
| OTU_2590 | k__Bacteria;p__Proteobacteria;c__Gammaproteobacteria;o__unidentified_Gammaproteobacteria;f__Competibacteraceae;g__Candidatus_Competibacter;s__ | 1 |
| OTU_2593 | k__Bacteria;p__Firmicutes;c__Clostridia;o__Clostridiales;f__Ruminococcaceae | 0.99 |
| OTU_2592 | k__Bacteria;p__Chloroflexi;c__Chloroflexia;o__Chloroflexales;f__Herpetosiphonaceae;g__Herpetosiphon;s__ | 1 |
| OTU_2599 | k__Bacteria;p__Proteobacteria;c__Deltaproteobacteria;o__Myxococcales;f__Nannocystaceae;g__Nannocystis;s__ | 0.95 |
| OTU_2598 | Unknown | 0 |
| OTU_2353 | k__Bacteria;p__Bacteroidetes;c__Bacteroidia;o__Bacteroidales;f__Prevotellaceae | 0.98 |
| OTU_2352 | k__Bacteria;p__Armatimonadetes;c__Chthonomonadetes;o__Chthonomonadales;f__;g__;s__ | 0.9 |
| OTU_641 | k__Bacteria;p__Proteobacteria;c__Gammaproteobacteria;o__Oceanospirillales;f__Saccharospirillaceae;g__Oleispira | 1 |
| OTU_2350 | k__Bacteria;p__Proteobacteria;c__Gammaproteobacteria;o__unidentified_Gammaproteobacteria;f__Hydrogenophilaceae;g__;s__ | 0.92 |
| OTU_2357 | k__Bacteria;p__Proteobacteria;c__Gammaproteobacteria;o__Salinisphaerales;f__Salinisphaeraceae;g__Salinisphaera | 1 |
| OTU_2356 | k__Bacteria;p__Bacteroidetes;c__Bacteroidia;o__Bacteroidales;f__Bacteroidaceae;g__Bacteroides;s__Bacteroides_sp_Marseille-P3166 | 1 |
| OTU_2355 | k__Bacteria;p__Proteobacteria;c__Gammaproteobacteria | 0.81 |
| OTU_2354 | k__Bacteria;p__Actinobacteria;c__unidentified_Actinobacteria | 1 |
| OTU_1802 | k__Bacteria;p__Firmicutes;c__Negativicutes;o__Selenomonadales;f__Veillonellaceae;g__Dialister | 0.92 |
| OTU_1803 | k__Bacteria;p__Bacteroidetes;c__Bacteroidia;o__Bacteroidales;f__Bacteroidaceae;g__Bacteroides | 1 |
| OTU_2359 | k__Bacteria | 1 |
| OTU_2358 | k__Bacteria;p__Bacteroidetes;c__Bacteroidia;o__Chitinophagales;f__Chitinophagaceae;g__Chitinophaga;s__Chitinophaga_japonensis | 0.8 |
| OTU_1806 | k__Bacteria;p__Proteobacteria;c__Gammaproteobacteria;o__Methylococcales;f__unidentified_Methylococcales;g__Methylomonas | 0.97 |
| OTU_1807 | k__Bacteria | 1 |
| OTU_1804 | k__Bacteria;p__Proteobacteria;c__Alphaproteobacteria;o__Rhizobiales;f__Xanthobacteraceae;g__Bradyrhizobium | 0.94 |
| OTU_1805 | k__Bacteria;p__Proteobacteria;c__Deltaproteobacteria;o__Syntrophobacterales;f__Syntrophobacteraceae;g__;s__ | 0.86 |
| OTU_2579 | k__Bacteria;p__Cyanobacteria;c__unidentified_Cyanobacteria;o__Nostocales;f__unidentified_Nostocales;g__unidentified_Nostocales;s__Oscillatoria_sp_SAG_7779 | 0.86 |
| OTU_2578 | k__Bacteria;p__Rokubacteria;c__;o__;f__;g__;s__ | 1 |
| OTU_2573 | k__Bacteria;p__Planctomycetes;c__Planctomycetacia;o__Planctomycetales;f__;g__;s__ | 1 |
| OTU_2572 | k__Bacteria;p__Firmicutes;c__Bacilli;o__Lactobacillales;f__Lactobacillaceae;g__Lactobacillus;s__Lactobacillus_intestinalis | 0.98 |
| OTU_2571 | k__Bacteria | 0.99 |
| OTU_2570 | k__Bacteria;p__Chloroflexi | 1 |
| OTU_2577 | k__Bacteria;p__Acidobacteria;c__Acidobacteriia;o__Solibacterales;f__unidentified_Solibacterales | 0.92 |
| OTU_2576 | k__Bacteria;p__Actinobacteria;c__Coriobacteriia;o__Coriobacteriales;f__Eggerthellaceae;g__Enterorhabdus | 0.92 |
| OTU_2575 | k__Bacteria;p__Firmicutes;c__Clostridia;o__Clostridiales;f__Lachnospiraceae;g__Blautia;s__Blautia_obeum | 0.88 |
| OTU_2574 | k__Bacteria;p__Bacteroidetes;c__Bacteroidia;o__Bacteroidales;f__Prolixibacteraceae;g__;s__ | 0.98 |
| OTU_2689 | k__Bacteria;p__Proteobacteria;c__Gammaproteobacteria;o__Enterobacteriales;f__Enterobacteriaceae | 0.99 |
| OTU_2688 | k__Bacteria;p__Proteobacteria;c__Gammaproteobacteria;o__Enterobacteriales;f__Enterobacteriaceae | 1 |
| OTU_2681 | k__Bacteria;p__Cyanobacteria;c__unidentified_Cyanobacteria;o__unidentified_Cyanobacteria;f__Leptolyngbyaceae;g__;s__ | 0.95 |
| OTU_2680 | k__Bacteria;p__Actinobacteria;c__Thermoleophilia;o__Gaiellales;f__;g__;s__ | 0.87 |
| OTU_2683 | k__Bacteria;p__Firmicutes;c__Bacilli;o__Bacillales | 0.98 |
| OTU_2682 | k__Bacteria;p__Planctomycetes;c__Planctomycetacia;o__unidentified_Planctomycetacia;f__Gemmataceae;g__;s__ | 0.91 |
| OTU_2685 | k__Bacteria;p__Planctomycetes;c__Phycisphaerae;o__Phycisphaerales;f__Phycisphaeraceae;g__;s__ | 0.93 |
| OTU_2684 | k__Bacteria;p__Firmicutes;c__Clostridia;o__Clostridiales;f__Lachnospiraceae;g__unidentified_Lachnospiraceae;s__[Ruminococcus]_gnavus | 0.84 |
| OTU_2687 | k__Bacteria;p__Bacteroidetes;c__Bacteroidia;o__Bacteroidales;f__;g__;s__ | 0.99 |
| OTU_2686 | k__Bacteria;p__Proteobacteria;c__Alphaproteobacteria;o__unidentified_Alphaproteobacteria;f__unidentified_Alphaproteobacteria;g__Pyruvatibacter;s__Pyruvatibacter_mobilis | 1 |
| OTU_2177 | k__Bacteria;p__Cyanobacteria;c__unidentified_Cyanobacteria;o__unidentified_Cyanobacteria;f__unidentified_Cyanobacteria;g__unidentified_Cyanobacteria | 0.87 |
| OTU_2176 | k__Bacteria;p__unidentified_Bacteria;c__unidentified_Bacteria;o__Campylobacterales;f__unidentified_Campylobacterales;g__Sulfurospirillum;s__Sulfurospirillum_cavolei | 1 |
| OTU_2175 | k__Bacteria;p__Proteobacteria;c__Alphaproteobacteria;o__Rickettsiales;f__unidentified_Rickettsiales;g__unidentified_Rickettsiales | 0.81 |
| OTU_2174 | k__Bacteria;p__Proteobacteria;c__Alphaproteobacteria;o__Rickettsiales;f__unidentified_Rickettsiales;g__unidentified_Rickettsiales;s__ | 0.83 |
| OTU_2173 | k__Bacteria;p__Proteobacteria;c__Gammaproteobacteria;o__Oceanospirillales;f__Hahellaceae;g__Hahella;s__Hahella_ganghwensis | 0.86 |
| OTU_2172 | k__Bacteria | 1 |
| OTU_2171 | k__Bacteria;p__Proteobacteria;c__Deltaproteobacteria;o__Myxococcales;f__Polyangiaceae;g__Pajaroellobacter;s__ | 1 |
| OTU_2170 | k__Bacteria | 1 |
| OTU_1648 | k__Bacteria;p__Actinobacteria;c__unidentified_Actinobacteria;o__Bifidobacteriales;f__Bifidobacteriaceae;g__Bifidobacterium | 0.95 |
| OTU_2179 | k__Bacteria;p__Proteobacteria;c__Alphaproteobacteria;o__Rhodobacterales;f__Rhodobacteraceae;g__Rubellimicrobium;s__ | 1 |
| OTU_2178 | k__Bacteria | 1 |
| OTU_2248 | k__Bacteria;p__Proteobacteria;c__Gammaproteobacteria;o__Alteromonadales;f__unidentified_Alteromonadales;g__Marinobacter;s__Marinobacter_algicola | 0.99 |
| OTU_79 | k__Bacteria;p__Firmicutes;c__Bacilli;o__Lactobacillales;f__Streptococcaceae;g__Streptococcus | 1 |
| OTU_549 | k__Bacteria;p__Proteobacteria;c__Alphaproteobacteria;o__Rhodobacterales;f__Rhodobacteraceae | 0.97 |
| OTU_2775 | k__Bacteria;p__Cyanobacteria;c__unidentified_Cyanobacteria;o__Nostocales | 1 |
| OTU_2947 | k__Bacteria;p__Firmicutes;c__Clostridia;o__Clostridiales;f__Ruminococcaceae | 0.97 |
| OTU_144 | k__Bacteria;p__Cyanobacteria;c__unidentified_Cyanobacteria;o__unidentified_Cyanobacteria;f__unidentified_Cyanobacteria;g__unidentified_Cyanobacteria | 1 |
| OTU_541 | k__Bacteria;p__Verrucomicrobia;c__Verrucomicrobiae;o__;f__;g__;s__ | 0.89 |
| OTU_540 | k__Bacteria;p__Actinobacteria;c__unidentified_Actinobacteria;o__Micrococcales;f__Microbacteriaceae;g__Microbacterium | 0.89 |
| OTU_543 | k__Bacteria;p__Bacteroidetes;c__Bacteroidia;o__Bacteroidales;f__Prevotellaceae;g__;s__ | 0.97 |
| OTU_542 | k__Bacteria;p__Firmicutes;c__Bacilli;o__Bacillales;f__Paenibacillaceae;g__Paenibacillus | 0.99 |
| OTU_545 | k__Bacteria;p__Actinobacteria;c__Acidimicrobiia;o__unidentified_Acidimicrobiia;f__Iamiaceae;g__Iamia;s__ | 1 |
| OTU_147 | k__Bacteria;p__Bacteroidetes;c__Bacteroidia;o__Cytophagales;f__Cytophagaceae;g__Cytophaga | 1 |
| OTU_547 | k__Bacteria;p__Bacteroidetes;c__Bacteroidia;o__Flavobacteriales;f__;g__;s__ | 0.98 |
| OTU_546 | k__Bacteria;p__Proteobacteria;c__Alphaproteobacteria;o__unidentified_Alphaproteobacteria;f__unidentified_Alphaproteobacteria | 1 |
| OTU_146 | k__Bacteria;p__Bacteroidetes;c__Bacteroidia;o__Bacteroidales;f__Marinifilaceae;g__Odoribacter;s__ | 1 |
| OTU_1014 | k__Bacteria;p__Cyanobacteria;c__unidentified_Cyanobacteria;o__unidentified_Cyanobacteria;f__unidentified_Cyanobacteria;g__unidentified_Cyanobacteria;s__Bathycoccus_prasinos | 1 |
| OTU_1767 | k__Bacteria;p__unidentified_Bacteria;c__unidentified_Bacteria;o__unidentified_Bacteria;f__unidentified_Bacteria;g__Candidatus_Saccharimonas;s__ | 1 |
| OTU_140 | k__Bacteria;p__Proteobacteria;c__Alphaproteobacteria;o__unidentified_Alphaproteobacteria;f__Acetobacteraceae | 1 |
| OTU_2779 | k__Bacteria;p__unidentified_Bacteria;c__unidentified_Bacteria;o__unidentified_Bacteria;f__unidentified_Bacteria;g__unidentified_Bacteria;s__bacterium_GBS-1 | 1 |
| OTU_2778 | k__Bacteria;p__Proteobacteria;c__Alphaproteobacteria | 0.97 |
| OTU_78 | k__Bacteria;p__Actinobacteria;c__unidentified_Actinobacteria;o__Corynebacteriales;f__Mycobacteriaceae;g__Mycobacterium | 1 |
| OTU_2240 | k__Bacteria;p__Chloroflexi;c__Anaerolineae;o__Ardenticatenales;f__;g__;s__ | 1 |
| OTU_145 | k__Bacteria;p__Proteobacteria;c__Deltaproteobacteria;o__Myxococcales;f__Sandaracinaceae | 1 |
| OTU_2774 | k__Bacteria;p__Chloroflexi;c__unidentified_Chloroflexi;o__unidentified_Chloroflexi;f__unidentified_Chloroflexi;g__unidentified_Chloroflexi;s__bacterium_Ellin6543 | 0.8 |
| OTU_2777 | k__Bacteria;p__Proteobacteria;c__Alphaproteobacteria;o__Sphingomonadales;f__Sphingomonadaceae;g__Sphingomonas | 0.98 |
| OTU_2776 | k__Bacteria;p__Proteobacteria;c__Gammaproteobacteria;o__Cardiobacteriales;f__unidentified_Cardiobacteriales;g__Ignatzschineria | 1 |
| OTU_2771 | k__Bacteria;p__Actinobacteria;c__Acidimicrobiia | 1 |
| OTU_2770 | k__Bacteria;p__Actinobacteria;c__unidentified_Actinobacteria;o__Micromonosporales;f__Micromonosporaceae;g__Hamadaea;s__ | 0.99 |
| OTU_2773 | k__Bacteria;p__Acidobacteria;c__Acidobacteriia;o__Solibacterales;f__unidentified_Solibacterales;g__Candidatus_Solibacter;s__ | 0.95 |
| OTU_2772 | k__Bacteria;p__Chloroflexi;c__Anaerolineae;o__unidentified_Anaerolineae;f__unidentified_Anaerolineae;g__unidentified_Anaerolineae;s__Chloroflexi_bacterium_OLB13 | 1 |
